# Supplementary material for: Chlorinated metabolites from Streptomyces sp. highlight the role of biosynthetic mosaics and superclusters in the evolution of chemical diversity
Source: Royal Society of Chemistry journal article supplement (doi:10.1039/d1ob00600b), 2021-01-01
Supplement: d1ob00600b1.pdf [file d1ob00600b1.pdf]

## SUPPORTING INFORMATION

### **Chlorinated metabolites from an Australian *Streptomyces* sp. highlight the role of biosynthetic mosaics and superclusters in the evolution of chemical diversity**

Mahmud T. Morshed,<sup>a</sup> Ernest Lacey,<sup>a,b</sup> Daniel Vuong,<sup>b</sup> Alastair E. Lacey,<sup>b</sup>  
Soo Sum Lean,<sup>c</sup> Stephen A. Moggach,<sup>c</sup> Peter Karuso,<sup>a</sup> Yit-Heng Chooi,<sup>c</sup>  
Thomas J. Booth<sup>c\*</sup> and Andrew M. Piggott<sup>a\*</sup>

<sup>a</sup>*Department of Molecular Sciences, Macquarie University, NSW 2109, Australia*

<sup>b</sup>*Microbial Screening Technologies, Smithfield, NSW 2164, Australia*

<sup>c</sup>*School of Molecular Sciences, University of Western Australia, Perth, WA 6009, Australia*

## Table of Contents

|    |                                                                        |    |
|----|------------------------------------------------------------------------|----|
| 1. | General experimental details .....                                     | 5  |
| 2. | Cultivation and extraction of <i>Streptomyces</i> sp. MST-144321 ..... | 6  |
| 3. | Isolation and purification of metabolites .....                        | 7  |
| 4. | Characterisation of compounds .....                                    | 9  |
| 5. | Biological screening .....                                             | 10 |
| 6. | Extraction and sequencing of genomic DNA .....                         | 12 |
| 7. | Genomic Features of MST-144321 .....                                   | 13 |
| 8. | Single-crystal X-ray diffraction analysis .....                        | 13 |

## Supplementary Tables

|                   |                                                                                                                                                          |    |
|-------------------|----------------------------------------------------------------------------------------------------------------------------------------------------------|----|
| <b>Table S1.</b>  | <sup>1</sup> H (600 MHz) and <sup>13</sup> C (150 MHz) NMR data for deschlorosvetamycin A ( <b>1</b> ) in DMSO- <i>d</i> <sub>6</sub> .....              | 15 |
| <b>Table S2.</b>  | <sup>1</sup> H (600 MHz) and <sup>13</sup> C (150 MHz) NMR data for svetamycin H ( <b>2</b> ) in DMSO- <i>d</i> <sub>6</sub> .....                       | 16 |
| <b>Table S3.</b>  | <sup>1</sup> H (600 MHz) and <sup>13</sup> C (150 MHz) NMR data for svetamycin A ( <b>3</b> ) in DMSO- <i>d</i> <sub>6</sub> .....                       | 17 |
| <b>Table S4.</b>  | <sup>1</sup> H (600 MHz) and <sup>13</sup> C (150 MHz) NMR data for borregomycin E ( <b>4</b> ) in DMSO- <i>d</i> <sub>6</sub> .....                     | 18 |
| <b>Table S5.</b>  | <sup>1</sup> H (600 MHz) and <sup>13</sup> C (150 MHz) NMR data for borregomycin F ( <b>5</b> ) in DMSO- <i>d</i> <sub>6</sub> .....                     | 19 |
| <b>Table S6.</b>  | <sup>1</sup> H (600 MHz) and <sup>13</sup> C (150 MHz) NMR data for borregomycin B ( <b>6</b> ) in DMSO- <i>d</i> <sub>6</sub> .....                     | 20 |
| <b>Table S7.</b>  | <sup>1</sup> H (600 MHz) and <sup>13</sup> C (150 MHz) NMR data for borregomycin C ( <b>7</b> ) in DMSO- <i>d</i> <sub>6</sub> .....                     | 21 |
| <b>Table S8.</b>  | <sup>1</sup> H (600 MHz) and <sup>13</sup> C (150 MHz) NMR data for (+)-ABX-G ( <b>8</b> ) in DMSO- <i>d</i> <sub>6</sub> .....                          | 22 |
| <b>Table S9.</b>  | <sup>1</sup> H (600 MHz) and <sup>13</sup> C (150 MHz) NMR data for (–)-ABX-K ( <b>9</b> ) in DMSO- <i>d</i> <sub>6</sub> .....                          | 23 |
| <b>Table S10.</b> | <sup>1</sup> H (600 MHz) and <sup>13</sup> C (150 MHz) NMR data for (–)-ABX-A ( <b>10</b> ) in DMSO- <i>d</i> <sub>6</sub> .....                         | 24 |
| <b>Table S11.</b> | <sup>1</sup> H (600 MHz) and <sup>13</sup> C (150 MHz) NMR data for (–)-ABX-B ( <b>11</b> ) in DMSO- <i>d</i> <sub>6</sub> .....                         | 25 |
| <b>Table S12.</b> | <sup>1</sup> H (600 MHz) and <sup>13</sup> C (150 MHz) NMR data for (–)-ABX-C ( <b>12</b> ) in DMSO- <i>d</i> <sub>6</sub> .....                         | 26 |
| <b>Table S13.</b> | <sup>1</sup> H (600 MHz) and <sup>13</sup> C (150 MHz) NMR data for (–)-ABX-D ( <b>13</b> ) in CDCl <sub>3</sub> .....                                   | 27 |
| <b>Table S14.</b> | <sup>1</sup> H (600 MHz) and <sup>13</sup> C (150 MHz) NMR data for (–)-ABX-E ( <b>14</b> ) in DMSO- <i>d</i> <sub>6</sub> .....                         | 28 |
| <b>Table S15.</b> | <sup>1</sup> H (600 MHz) and <sup>13</sup> C (150 MHz) NMR data for (–)-BABX ( <b>15</b> ) in CDCl <sub>3</sub> .....                                    | 29 |
| <b>Table S16.</b> | XYZ coordinates for geometry-optimised (DFT-D3(BJ)/PBE0/def2-SV(P)-COSMO(MeCN)) ground-state structure of (6 <i>R</i> ,16 <i>R</i> )-ABX-G .....         | 30 |
| <b>Table S17.</b> | XYZ coordinates for geometry-optimised (DFT-D3(BJ)/PBE0/def2-SV(P)-COSMO(MeCN)) ground-state structure of (6 <i>S</i> ,16 <i>S</i> )-ABX-G .....         | 31 |
| <b>Table S18.</b> | XYZ coordinates for geometry-optimised (DFT-D3(BJ)/PBE0/def2-SV(P)-COSMO(MeCN)) ground-state structure of (6 <i>R</i> ,16 <i>R</i> )-ABX-K .....         | 32 |
| <b>Table S19.</b> | XYZ coordinates for geometry-optimised (DFT-D3(BJ)/PBE0/def2-SV(P)-COSMO(MeCN)) ground-state structure of (6 <i>S</i> ,16 <i>S</i> )-ABX-K .....         | 33 |
| <b>Table S20.</b> | Genes encoding the svetamycin ( <i>sve</i> ) biosynthetic gene cluster and their closest known homologues .....                                          | 34 |
| <b>Table S21.</b> | cblaster analysis of the svetamycin ( <i>sve</i> ) BGC showing hits against the MIBiG database .....                                                     | 35 |
| <b>Table S22.</b> | Genes encoding the borregomycin/anthrabenzoxocinone ( <i>bab</i> ) biosynthetic super cluster and their closest known homologues .....                   | 36 |
| <b>Table S23.</b> | cblaster analysis of the borregomycin/anthrabenzoxocinone ( <i>bab</i> ) biosynthetic super cluster showing hits against the MIBiG database .....        | 37 |
| <b>Table S24.</b> | Biosynthetic gene clusters in the MST-144321 genome as predicted by AntiSMASH v4.0 .....                                                                 | 38 |
| <b>Table S25.</b> | Homologues of proteins encoded by the tjipanazole ( <i>tjp</i> ) BGC in the genome of <i>Streptomyces</i> sp. MST-144321 .....                           | 39 |
| <b>Table S26.</b> | Media recipes .....                                                                                                                                      | 40 |
| <b>Table S27.</b> | Comparison of composition and abundance of secondary metabolites from methanolic extracts of <i>Streptomyces</i> sp. MST-144321 from various media ..... | 41 |
| <b>Table S28.</b> | cblaster search results for svetamycin against the NCBI database .....                                                                                   | 42 |
| <b>Table S29.</b> | Single-crystal XRD experimental details for svetamycin A ( <b>3</b> ) .....                                                                              | 43 |

## Supplementary Figures

|                                                                                                                                                                |    |
|----------------------------------------------------------------------------------------------------------------------------------------------------------------|----|
| <b>Figure S1.</b> HPLC trace of crude ethyl acetate extract of <i>Streptomyces</i> sp. MST-144321 after cultivation on pearl barley media for 10 days .....    | 44 |
| <b>Figure S2.</b> HPLC traces of the methanolic extracts of <i>Streptomyces</i> sp. MST-144321 grown on various media for 7 days at 28 °C. ....                | 45 |
| <b>Figure S3.</b> Fractionation of crude ethyl acetate extract of <i>Streptomyces</i> sp. MST-144321 after cultivation on pearl barley media for 10 days ..... | 46 |
| <b>Figure S4.</b> <sup>1</sup> H NMR spectrum (600 MHz, DMSO- <i>d</i> <sub>6</sub> ) of deschlorosvetamycin A (1).....                                        | 47 |
| <b>Figure S5.</b> <sup>13</sup> C NMR spectrum (150 MHz, DMSO- <i>d</i> <sub>6</sub> ) of deschlorosvetamycin A (1).....                                       | 48 |
| <b>Figure S6.</b> <sup>1</sup> H- <sup>13</sup> C HSQC NMR spectrum (600 MHz, DMSO- <i>d</i> <sub>6</sub> ) of deschlorosvetamycin A (1).....                  | 49 |
| <b>Figure S7.</b> <sup>1</sup> H- <sup>13</sup> C HMBC NMR spectrum (600 MHz, DMSO- <i>d</i> <sub>6</sub> ) of deschlorosvetamycin A (1).....                  | 50 |
| <b>Figure S8.</b> <sup>1</sup> H- <sup>1</sup> H COSY NMR spectrum (600 MHz, DMSO- <i>d</i> <sub>6</sub> ) of deschlorosvetamycin A (1).....                   | 51 |
| <b>Figure S9.</b> <sup>1</sup> H- <sup>1</sup> H ROESY NMR spectrum (600 MHz, DMSO- <i>d</i> <sub>6</sub> ) of deschlorosvetamycin A (1) .....                 | 52 |
| <b>Figure S10.</b> <sup>1</sup> H NMR spectrum (600 MHz, DMSO- <i>d</i> <sub>6</sub> ) of svetamycin H (2) .....                                               | 53 |
| <b>Figure S11.</b> <sup>13</sup> C NMR spectrum (150 MHz, DMSO- <i>d</i> <sub>6</sub> ) of svetamycin H (2) .....                                              | 54 |
| <b>Figure S12.</b> <sup>1</sup> H- <sup>13</sup> C HSQC NMR spectrum (600 MHz, DMSO- <i>d</i> <sub>6</sub> ) of svetamycin H (2) .....                         | 55 |
| <b>Figure S13.</b> <sup>1</sup> H- <sup>13</sup> C HMBC NMR spectrum (600 MHz, DMSO- <i>d</i> <sub>6</sub> ) of svetamycin H (2) .....                         | 56 |
| <b>Figure S14.</b> <sup>1</sup> H- <sup>1</sup> H COSY NMR spectrum (600 MHz, DMSO- <i>d</i> <sub>6</sub> ) of svetamycin H (2) .....                          | 57 |
| <b>Figure S15.</b> <sup>1</sup> H- <sup>1</sup> H ROESY NMR spectrum (600 MHz, DMSO- <i>d</i> <sub>6</sub> ) of svetamycin H (2).....                          | 58 |
| <b>Figure S16.</b> <sup>1</sup> H NMR spectrum (600 MHz, DMSO- <i>d</i> <sub>6</sub> ) of svetamycin A (3) .....                                               | 59 |
| <b>Figure S17.</b> <sup>13</sup> C NMR spectrum (150 MHz, DMSO- <i>d</i> <sub>6</sub> ) of svetamycin A (3) .....                                              | 60 |
| <b>Figure S18.</b> <sup>1</sup> H NMR spectrum (600 MHz, DMSO- <i>d</i> <sub>6</sub> ) of borregomycin E (4).....                                              | 61 |
| <b>Figure S19.</b> <sup>13</sup> C NMR spectrum (150 MHz, DMSO- <i>d</i> <sub>6</sub> ) of borregomycin E (4) .....                                            | 62 |
| <b>Figure S20.</b> <sup>1</sup> H- <sup>13</sup> C HSQC NMR spectrum (600 MHz, DMSO- <i>d</i> <sub>6</sub> ) of borregomycin E (4) .....                       | 63 |
| <b>Figure S21.</b> <sup>1</sup> H- <sup>13</sup> C HMBC NMR spectrum (600 MHz, DMSO- <i>d</i> <sub>6</sub> ) of borregomycin E (4) .....                       | 64 |
| <b>Figure S22.</b> <sup>1</sup> H- <sup>1</sup> H COSY NMR spectrum (600 MHz, DMSO- <i>d</i> <sub>6</sub> ) of borregomycin E (4).....                         | 65 |
| <b>Figure S23.</b> <sup>1</sup> H- <sup>1</sup> H ROESY NMR spectrum (600 MHz, DMSO- <i>d</i> <sub>6</sub> ) of borregomycin E (4).....                        | 66 |
| <b>Figure S24.</b> <sup>1</sup> H NMR spectrum (600 MHz, DMSO- <i>d</i> <sub>6</sub> ) of borregomycin F (5).....                                              | 67 |
| <b>Figure S25.</b> <sup>13</sup> C NMR spectrum (150 MHz, DMSO- <i>d</i> <sub>6</sub> ) of borregomycin F (5).....                                             | 68 |
| <b>Figure S26.</b> <sup>1</sup> H- <sup>13</sup> C HSQC NMR spectrum (600 MHz, DMSO- <i>d</i> <sub>6</sub> ) of borregomycin F (5).....                        | 69 |
| <b>Figure S27.</b> <sup>1</sup> H- <sup>13</sup> C HMBC NMR spectrum (600 MHz, DMSO- <i>d</i> <sub>6</sub> ) of borregomycin F (5) .....                       | 70 |
| <b>Figure S28.</b> <sup>1</sup> H- <sup>1</sup> H COSY NMR spectrum (600 MHz, DMSO- <i>d</i> <sub>6</sub> ) of borregomycin F (5).....                         | 71 |
| <b>Figure S29.</b> <sup>1</sup> H- <sup>1</sup> H ROESY NMR spectrum (600 MHz, DMSO- <i>d</i> <sub>6</sub> ) of borregomycin F (5) .....                       | 72 |
| <b>Figure S30.</b> <sup>1</sup> H NMR spectrum (600 MHz, DMSO- <i>d</i> <sub>6</sub> ) of borregomycin B (6) .....                                             | 73 |
| <b>Figure S31.</b> <sup>13</sup> C NMR spectrum (150 MHz, DMSO- <i>d</i> <sub>6</sub> ) of borregomycin B (6) .....                                            | 74 |
| <b>Figure S32.</b> <sup>1</sup> H NMR spectrum (600 MHz, DMSO- <i>d</i> <sub>6</sub> ) of borregomycin C (7) .....                                             | 75 |
| <b>Figure S33.</b> <sup>13</sup> C NMR spectrum (150 MHz, DMSO- <i>d</i> <sub>6</sub> ) of borregomycin C (7) .....                                            | 76 |
| <b>Figure S34.</b> <sup>1</sup> H NMR spectrum (600 MHz, DMSO- <i>d</i> <sub>6</sub> ) of (+)-ABX-G (8) .....                                                  | 77 |
| <b>Figure S35.</b> <sup>13</sup> C NMR spectrum (150 MHz, DMSO- <i>d</i> <sub>6</sub> ) of (+)-ABX-G (8) .....                                                 | 78 |
| <b>Figure S36.</b> <sup>1</sup> H- <sup>13</sup> C HSQC NMR spectrum (600 MHz, DMSO- <i>d</i> <sub>6</sub> ) of (+)-ABX-G (8) .....                            | 79 |
| <b>Figure S37.</b> <sup>1</sup> H- <sup>13</sup> C HMBC NMR spectrum (600 MHz, DMSO- <i>d</i> <sub>6</sub> ) of (+)-ABX-G (8) .....                            | 80 |
| <b>Figure S38.</b> <sup>1</sup> H- <sup>1</sup> H COSY NMR spectrum (600 MHz, DMSO- <i>d</i> <sub>6</sub> ) of (+)-ABX-G (8) .....                             | 81 |
| <b>Figure S39.</b> <sup>1</sup> H- <sup>1</sup> H ROESY NMR spectrum (600 MHz, DMSO- <i>d</i> <sub>6</sub> ) of (+)-ABX-G (8).....                             | 82 |
| <b>Figure S40.</b> <sup>1</sup> H NMR spectrum (600 MHz, DMSO- <i>d</i> <sub>6</sub> ) of (-)-ABX-K (9).....                                                   | 83 |
| <b>Figure S41.</b> <sup>13</sup> C NMR spectrum (150 MHz, DMSO- <i>d</i> <sub>6</sub> ) of (-)-ABX-K (9).....                                                  | 84 |
| <b>Figure S42.</b> <sup>1</sup> H- <sup>13</sup> C HSQC NMR spectrum (600 MHz, DMSO- <i>d</i> <sub>6</sub> ) of (-)-ABX-K (9).....                             | 85 |
| <b>Figure S43.</b> <sup>1</sup> H- <sup>13</sup> C HMBC NMR spectrum (600 MHz, DMSO- <i>d</i> <sub>6</sub> ) of (-)-ABX-K (9) .....                            | 86 |
| <b>Figure S44.</b> <sup>1</sup> H- <sup>1</sup> H COSY NMR spectrum (600 MHz, DMSO- <i>d</i> <sub>6</sub> ) of (-)-ABX-K (9).....                              | 87 |
| <b>Figure S45.</b> <sup>1</sup> H- <sup>1</sup> H ROESY NMR spectrum (600 MHz, DMSO- <i>d</i> <sub>6</sub> ) of (-)-ABX-K (9) .....                            | 88 |
| <b>Figure S46.</b> <sup>1</sup> H NMR spectrum (600 MHz, DMSO- <i>d</i> <sub>6</sub> ) of (-)-ABX-A (10).....                                                  | 89 |
| <b>Figure S47.</b> <sup>13</sup> C NMR spectrum (150 MHz, DMSO- <i>d</i> <sub>6</sub> ) of (-)-ABX-A (10).....                                                 | 90 |
| <b>Figure S48.</b> <sup>1</sup> H NMR spectrum (600 MHz, DMSO- <i>d</i> <sub>6</sub> ) of (-)-ABX-B (11).....                                                  | 91 |

|                                                                                                                                                                                                                                                                                                                                          |     |
|------------------------------------------------------------------------------------------------------------------------------------------------------------------------------------------------------------------------------------------------------------------------------------------------------------------------------------------|-----|
| <b>Figure S49.</b> $^{13}\text{C}$ NMR spectrum (150 MHz, $\text{DMSO-}d_6$ ) of (–)-ABX-B ( <b>11</b> ).....                                                                                                                                                                                                                            | 92  |
| <b>Figure S50.</b> $^1\text{H}$ NMR spectrum (600 MHz, $\text{DMSO-}d_6$ ) of (–)-ABX-C ( <b>12</b> ).....                                                                                                                                                                                                                               | 93  |
| <b>Figure S51.</b> $^{13}\text{C}$ NMR spectrum (150 MHz, $\text{DMSO-}d_6$ ) of (–)-ABX-C ( <b>12</b> ).....                                                                                                                                                                                                                            | 94  |
| <b>Figure S52.</b> $^1\text{H}$ NMR spectrum (600 MHz, $\text{CDCl}_3$ ) of (–)-ABX-D ( <b>13</b> ).....                                                                                                                                                                                                                                 | 95  |
| <b>Figure S53.</b> $^{13}\text{C}$ NMR spectrum (150 MHz, $\text{CDCl}_3$ ) of (–)-ABX-D ( <b>13</b> ).....                                                                                                                                                                                                                              | 96  |
| <b>Figure S54.</b> $^1\text{H}$ NMR spectrum (600 MHz, $\text{DMSO-}d_6$ ) of (–)-ABX-E ( <b>14</b> ).....                                                                                                                                                                                                                               | 97  |
| <b>Figure S55.</b> $^{13}\text{C}$ NMR spectrum (150 MHz, $\text{DMSO-}d_6$ ) of (–)-ABX-E ( <b>14</b> ).....                                                                                                                                                                                                                            | 98  |
| <b>Figure S56.</b> $^1\text{H}$ NMR spectrum (600 MHz, $\text{CDCl}_3$ ) of (–)-BABX ( <b>15</b> ).....                                                                                                                                                                                                                                  | 99  |
| <b>Figure S57.</b> $^{13}\text{C}$ NMR spectrum (150 MHz, $\text{CDCl}_3$ ) of (–)-BABX ( <b>15</b> ).....                                                                                                                                                                                                                               | 100 |
| <b>Figure S58.</b> HR-ESI(+)-MS spectrum of deschlorosvetamycin A ( <b>1</b> ).....                                                                                                                                                                                                                                                      | 101 |
| <b>Figure S59.</b> HR-ESI(–)-MS spectrum of svetamycin H ( <b>2</b> ).....                                                                                                                                                                                                                                                               | 102 |
| <b>Figure S60.</b> HR-ESI(–)-MS spectrum of borregomycin E ( <b>4</b> ).....                                                                                                                                                                                                                                                             | 103 |
| <b>Figure S61.</b> HR-ESI(–)-MS spectrum of borregomycin F ( <b>5</b> ).....                                                                                                                                                                                                                                                             | 104 |
| <b>Figure S62.</b> HR-ESI(+)-MS spectrum of (+)-ABX-G ( <b>8</b> ).....                                                                                                                                                                                                                                                                  | 105 |
| <b>Figure S63.</b> HR-ESI(+)-MS spectrum of (–)-ABX-K ( <b>9</b> ).....                                                                                                                                                                                                                                                                  | 106 |
| <b>Figure S64.</b> UV-vis spectrum of deschlorosvetamycin A ( <b>1</b> ) in $\text{CHCl}_3$ .....                                                                                                                                                                                                                                        | 107 |
| <b>Figure S65.</b> UV-vis spectrum of svetamycin H ( <b>2</b> ) in $\text{CHCl}_3$ .....                                                                                                                                                                                                                                                 | 107 |
| <b>Figure S66.</b> UV-vis spectrum of borregomycin E ( <b>4</b> ) in $\text{CHCl}_3$ .....                                                                                                                                                                                                                                               | 108 |
| <b>Figure S67.</b> UV-vis spectrum of borregomycin F ( <b>5</b> ) in $\text{CHCl}_3$ .....                                                                                                                                                                                                                                               | 108 |
| <b>Figure S68.</b> UV-vis spectrum of (+)-ABX-G ( <b>8</b> ) in $\text{CHCl}_3$ .....                                                                                                                                                                                                                                                    | 109 |
| <b>Figure S69.</b> UV-vis spectrum of (–)-ABX-K ( <b>9</b> ) in $\text{CHCl}_3$ .....                                                                                                                                                                                                                                                    | 109 |
| <b>Figure S70.</b> ECD spectra of ABX analogues <b>9–15</b> in $\text{CHCl}_3$ .....                                                                                                                                                                                                                                                     | 110 |
| <b>Figure S71.</b> TD-DFT-D3(BJ)/PBE0/def2-SV(P)-COSMO(MeCN) calculated rotatory strengths for (6 <i>R</i> ,16 <i>R</i> )-ABX-G and (6 <i>S</i> ,16 <i>S</i> )-ABX-G, blue-shifted by 5 nm and broadened with an 18 nm standard deviation, compared to the experimental ECD spectrum for the natural product (+)-ABX-G ( <b>8</b> )..... | 111 |
| <b>Figure S72.</b> TD-DFT-D3(BJ)/PBE0/def2-SV(P)-COSMO(MeCN) calculated rotatory strengths for (6 <i>R</i> ,16 <i>R</i> )-ABX-K and (6 <i>S</i> ,16 <i>S</i> )-ABX-K, broadened with an 18 nm standard deviation, compared to the experimental ECD spectrum for the natural product (–)-ABX-K ( <b>9</b> ).....                          | 112 |
| <b>Figure S73.</b> Phylogenetic tree of related <i>Streptomyces</i> strains as produced by AutoMLST.....                                                                                                                                                                                                                                 | 113 |
| <b>Figure S74.</b> Walker motif of adenylation domains from the svetamycin ( <i>sve</i> ) biosynthetic gene cluster.....                                                                                                                                                                                                                 | 113 |
| <b>Figure S75.</b> Phylogenetic prediction of condensation domain function generated by NaPDoS. <sup>20</sup> .....                                                                                                                                                                                                                      | 114 |
| <b>Figure S76.</b> Varied oxidative reactions catalysed by BabO2 homologues.....                                                                                                                                                                                                                                                         | 115 |
| <b>Figure S77.</b> Phylogenetic tree of BabO2 homologues indicating the evolutionary history of the biosynthetic supercluster.....                                                                                                                                                                                                       | 116 |
| <b>Figure S78.</b> Putative pathways for the biosynthesis of borregomycin E ( <b>4</b> ) adapted from Chilczuk et al., 2020. <sup>21</sup> .....                                                                                                                                                                                         | 117 |
| <b>Figure S79.</b> Comparison of borregomycin ( <i>bor</i> and <i>bab</i> ) and tjipanazole ( <i>tjp</i> ) BGCs. For simplicity, only regions homologous to tjipanazole biosynthesis are shown. Made using clinker <sup>22</sup> .....                                                                                                   | 118 |

## 1. General experimental details

Optical rotations were acquired in  $\text{CHCl}_3$  on a Jasco P-1010 polarimeter in a  $10 \times 10$  mm cell. UV-vis spectra were acquired in MeOH on a Varian Cary 4000 spectrophotometer or a Jasco V-760 spectrophotometer in a  $10 \times 10$  mm quartz cuvette. ECD spectra were acquired on a Jasco J-810 spectropolarimeter. Analytical HPLC was performed on a gradient Agilent 1260 Infinity quaternary HPLC system consisting of a G4212B diode array detector. The column was an Agilent Poroshell 120 EC-C<sub>18</sub> ( $4.6 \times 50$  mm,  $2.7 \mu\text{m}$ ) eluted with a  $1 \text{ mL min}^{-1}$  gradient of 10–100% acetonitrile/water (0.1% TFA) over 8.33 min. Semi-preparative HPLC was performed on a gradient Agilent 1260 Infinity quaternary HPLC system coupled to a G4212B diode array detector. The column was an Agilent Zorbax SB-C<sub>18</sub> ( $9.4 \times 250$  mm,  $5 \mu\text{m}$ ) eluted with a  $4.18 \text{ mL min}^{-1}$  gradient of 10–100% acetonitrile/water (0.1% TFA) over 40 min.

Preparative HPLC was performed on a gradient Shimadzu HPLC system comprising two LC-20AP preparative liquid pumps with static mixer, SPD-M20A diode array detector and CBM-20A/20ALite system controller with a 7725i Rheodyne injection port. The columns used in the purification of the metabolites were selected from either an Agilent Zorbax SB-C<sub>18</sub> column ( $21.2 \times 250$  mm,  $7 \mu\text{m}$ ) or an Agilent Zorbax SB-C<sub>18</sub> column ( $50 \times 150$  mm,  $5 \mu\text{m}$ ) eluted isocratically with acetonitrile/water mixtures containing 0.05% TFA modifier. LCMS was performed on an Agilent 1260 Infinity series UHPLC equipped with an Agilent 6130B single quadrupole mass detector in both positive and negative ion modes. High resolution electrospray ionisation mass spectra (HRESIMS) were obtained on a Q Exactive Plus hybrid quadrupole-Orbitrap mass spectrometer (Thermo Fisher Scientific, Bremen, Germany) by direct infusion. <sup>1</sup>H NMR and <sup>13</sup>C NMR spectra were recorded in 5 mm Pyrex tubes (Wilmad, USA) on either a Bruker Avance II DRX-600K 600 MHz or Bruker Avance III HD 500 MHz spectrometer. All spectra were obtained at 25 °C, processed using Bruker Topspin 3.5 software and referenced to residual solvent signals ( $\text{DMSO-}d_6$   $\delta_{\text{H}}$  2.49/ $\delta_{\text{C}}$  39.5 or  $\text{CDCl}_3$   $\delta_{\text{H}}$  7.26/ $\delta_{\text{C}}$  77.1).

Molecular modelling: Models of ABX-K and ABX-G were built in Molecular Operating Environment 2019 (MOE2019.01; Chemical Computing Group) and were energy-minimized (MMFF94x)<sup>1</sup>. A comprehensive conformational search using low-mode molecular dynamics was used to identify the global minimum energy structures. All structures within 2.5 kcal mol<sup>-1</sup> of the global minimum were then minimised using density functional theory (DFT BP86/def2-SV(P) followed by DFT PBE0-D3(BJ)/def2-SV(P)) in DMSO (COSMO) using Turbomole 7.1.1 (Cosmologic, GmbH & Co)<sup>2</sup> ECD calculations were performed at the same level of theory (TDDFT PBE0-D3(BJ)/def2-SV(P)-COSMO (DMSO)) and blue-shifted by 5 nm to compensate for systematic basis set errors.

## **2. Cultivation and extraction of *Streptomyces* sp. MST-144321**

*Streptomyces* sp. MST-144321 was isolated from soil collected 4.2 km south of Yass, New South Wales, Australia in 1997. Optimisation of cultivation conditions for maximum metabolite production was undertaken on a range of agar- and grain-based media. The agars (ISP2, oatmeal, nutrient, NZ-amine and casein glycerol) were prepared according to the recipes in Table S25. The grains (barley, jasmine rice, basmati rice and cracked wheat) were hydrated (30 mL water per 50 g grain) and sterilised at 121 °C for 40 min. Each of the agars and grains were inoculated with a suspension of MST-144321 and were incubated at 28 °C for 10 days. Cultures were sampled (1 g), extracted with methanol (2 mL) for 1 h on a wrist shaker, centrifuged (15,700 × g for 3 min) and analysed by HPLC.

Morphologically the strain was unremarkable in pigmentation, growth patterns, media or temperature optima. A crude methanolic extract of the confluent growth on ISP2 agar at 28 °C, 7 days was active against bacteria (*Bacillus subtilis* and *Staphylococcus aureus*) and nematodes (*Haemonchus contortus*), with weak activity against fungi (*Saccharomyces cerevisiae* and *Candida albicans*). DAD-HPLC analysis and dereplication identified the strain as containing no metabolites previously observed in our standards library, not corresponding to the metabolite profile of any of the 2,500 type and patent strains in our collection and only a single partial replicate (MST-123216) isolated from

Wellington, NSW. The UV-vis spectra of the dominant metabolites possessed unusual maxima, some similar to rebeccamycin. LCMS analysis indicated that despite the dissimilarity of the UV-vis spectra, most of the major metabolites showed isotopic clusters characteristic of the presence one or more chlorine atoms. This pattern of bioassay activity, UV spectra and isotopic patterns had not been found in our library previously. MST-144321 grew readily on a wide variety of agar, liquids and grains with consistently high production of secondary metabolites on all media (Figure S2).

Based on the optimisation results, barley was selected for large-scale cultivation of *Streptomyces* sp. MST-144321. The barley was hydrated and sterilised in 40 Erlenmeyer flasks (250 mL, each containing 50 g of barley with 30 mL water), inoculated with a spore suspension made from culture grown on ISP2 for 7 days, and incubated at 28 °C for 10 days, by which time the culture had reached maximal metabolite productivity. The grains were then pooled, extracted with acetone (2 × 6 L), and the combined extract was concentrated *in vacuo* to give an aqueous residue (99 g in 1600 mL). The aqueous concentrate was partitioned against EtOAc (2 × 2 L) and the organic layer was dried under reduce pressure to give an oily residue (46 g), with additional insoluble material at the solvent interface collected separately (4.1 g). The aqueous phase was lyophilised to a solid residue (41 g).

### 3. Isolation and purification of metabolites

A portion of the crude extract (4 g) was dissolved in MeOH (500 mL) and partitioned against hexane (2 × 400 mL) to remove fats, providing an enriched extract (958 mg). The enriched extract was dissolved in MeOH (20 mL) and evaporated onto 20 g of silica gel under reduced pressure. The silica was dry-loaded onto a silica gel column (55 g; 300 × 30 mm) and the column was washed once with hexane (400 mL), and then eluted with 50% hexane/CHCl<sub>3</sub> (400 mL) and CHCl<sub>3</sub> (400 mL), followed by a stepwise gradient of 1, 2, 4, 8, 16 and 100% MeOH (400 mL each step) yielding nine fractions (Fr. 1–9). Fr. 2 (74 mg) was purified by semi-preparative HPLC (Agilent Zorbax SB-C<sub>18</sub>, isocratic 80% MeCN/H<sub>2</sub>O containing 0.1% TFA, 4.18 mL min<sup>-1</sup>) to yield (–)-ABX-D (**13**) (*t*<sub>R</sub> = 11.1 min; 1.3

mg) and (–)BABX (**15**) ( $t_R = 14.2$  min; 31 mg). Fr. 3 (419 mg) was purified by preparative HPLC (Agilent Zorbax C<sub>18</sub>, isocratic 75% MeCN/H<sub>2</sub>O containing 0.05% TFA, 20 mL min<sup>-1</sup>) to yield (–)ABX-C (**12**) ( $t_R = 14.6$  min; 3.3 mg) and (–)ABX-B (**11**) ( $t_R = 16.9$  min; 26 mg). Fr. 4 (135 mg) was further fractionated by C<sub>18</sub> SPE (2 g) using a stepwise gradient of 20, 30, 40, 50, 60% MeCN/H<sub>2</sub>O and 100% MeCN (50 mL per fraction), yielding 6 fractions (Fr. 4A–4F). Fr. 4C (45 mg) was purified by semi-preparative HPLC (Agilent Zorbax SB-C<sub>18</sub>, isocratic 55% MeCN/H<sub>2</sub>O containing 0.1% TFA, 4.18 mL min<sup>-1</sup>) to yield borregomycin C (**7**) ( $t_R = 8.8$  min; 1.7 mg), (–)ABX-A (**10**) ( $t_R = 14.0$  min; 3.8 mg), (+)ABX-G (**8**) ( $t_R = 18.3$  min; 1.7 mg), (–)ABX-K (**9**) ( $t_R = 21.3$  min; 4.0 mg) and borregomycin B (**6**) ( $t_R = 24.2$  min; 4.3 mg). Fr. 4D was purified by semi-preparative HPLC (Agilent Zorbax SB-C<sub>18</sub>, isocratic 65% MeCN/H<sub>2</sub>O containing 0.1% TFA, 4.18 mL min<sup>-1</sup>) to yield (–)ABX-E (**14**) ( $t_R = 23.0$  min; 3.6 mg) and borregomycin E (**4**) ( $t_R = 28.4$  min; 3.9 mg). Fr. 5 (88 mg) was further fractionated by C<sub>18</sub> SPE (2 g) using stepwise gradient of 20, 40, 60 % MeCN/H<sub>2</sub>O and 100% MeCN (50 mL per fraction), yielding four fractions (Fr. 5A–5D). Fr. 5C (18.7 mg) was purified by semi-preparative HPLC (Agilent Zorbax SB-C<sub>18</sub>, isocratic 85% MeOH/H<sub>2</sub>O containing 0.1% TFA, 4.18 mL min<sup>-1</sup>) to yield borregomycin F (**5**) ( $t_R = 8.7$  min; 1.0 mg). Fr. 6 (85 mg) was purified by semi-preparative HPLC (Agilent Zorbax SB-C<sub>18</sub>, isocratic 25% MeCN/H<sub>2</sub>O containing 0.1% TFA, 4.18 mL min<sup>-1</sup>) to yield deschlorosvetamycin A (**1**) ( $t_R = 9.5$  min; 2.5 mg) and svetamycin A (**3**) ( $t_R = 16.7$  min; 9.6 mg).

The crude aqueous extract (12 g) was triturated with methanol (20 mL) to provide an enriched extract (2.0 g). The enriched extract was fractionated on by C<sub>18</sub> SPE (10 g) using a stepwise gradient of 1, 2, 4, 8, 16% MeOH/H<sub>2</sub>O and 100% MeOH (200 mL per fraction), yielding six fractions (Fr. 1–6). Fr. 6 (265 mg) was further purified by C<sub>18</sub> SPE (10 g) using a stepwise gradient of 10, 15, 20, 30 and 100% MeOH (120 mL per fraction), yielding 5 fractions (Fr. A–E). Fraction B was purified by semi-preparative HPLC (Agilent Zorbax SB-C<sub>18</sub>, isocratic 15% MeCN/H<sub>2</sub>O containing 0.01% TFA, 4.18 mL min<sup>-1</sup>) to yield svetamycin H (**2**) ( $t_R = 29.0$  min; 6.5 mg).



The insoluble material (4.1 g) was triturated with 50% DMSO in MeOH (50 mL) and the solid residue (920 mg) was dissolved in MeOH + 0.1% TFA (10 mL) and purified by preparative HPLC (Agilent Zorbax SB-C<sub>18</sub>, isocratic 35% MeCN/H<sub>2</sub>O containing 0.1% TFA, 60 mL min<sup>-1</sup>) to yield additional deschlorosvetamycin A (**1**) (*t<sub>R</sub>* = 7.3 min; 4.6 mg) and svetamycin A (**3**) (*t<sub>R</sub>* = 10.85 min; 11.5 mg).

#### 4. Characterisation of compounds

Deschlorosvetamycin A (**1**): Colourless amorphous powder;  $[\alpha]_{\text{D}}^{23}$  -31 (*c* 0.024, CHCl<sub>3</sub>); UV (MeOH)  $\lambda_{\text{max}}$  (log  $\epsilon$ ) 204.4 (4.92), 242.8 (4.60); IR (ATR)  $\nu_{\text{max}}$  3263, 2936, 2351, 1676, 1528, 1424, 1249, 1128 cm<sup>-1</sup>; NMR (600 MHz, DMSO-*d*<sub>6</sub>) see Table S1; HR-ESI(+)-MS *m/z* 597.2623 [M + H]<sup>+</sup> (calculated for C<sub>24</sub>H<sub>37</sub>N<sub>8</sub>O<sub>10</sub><sup>+</sup>, 597.2627).

Svetamycin H (**2**): White amorphous powder;  $[\alpha]_{\text{D}}^{23}$  -21 (*c* 0.027, CHCl<sub>3</sub>); UV (CHCl<sub>3</sub>)  $\lambda_{\text{max}}$  (log  $\epsilon$ ) 205.6 (4.94), 245.0 (4.42), 292.0 (3.72); IR (ATR)  $\nu_{\text{max}}$  2975, 2351, 1682, 1520, 1052 cm<sup>-1</sup>; NMR (600 MHz, DMSO-*d*<sub>6</sub>) see Table S2; HR-ESI(-)-MS *m/z* 647.2196 [M - H]<sup>-</sup> (calculated for C<sub>24</sub>H<sub>36</sub>N<sub>8</sub><sup>35</sup>ClO<sub>11</sub><sup>-</sup>, 647.2197).

Borregomycin E (**4**): Greenish black powder, UV (CHCl<sub>3</sub>)  $\lambda_{\text{max}}$  (log  $\epsilon$ ) 212.6 (4.12), 274.8 (4.12), 331.8 (3.98), 368.6 (3.44); IR (ATR)  $\nu_{\text{max}}$  3327, 2927, 2856, 2352, 1665, 1613, 1446, 1373, 1297, 1192 cm<sup>-1</sup>; NMR (600 MHz, DMSO-*d*<sub>6</sub>) see Table S4; HR-ESI(-)-MS *m/z* 383.0356 [M - H]<sup>-</sup> (calculated for C<sub>20</sub>H<sub>13</sub><sup>35</sup>Cl<sub>2</sub>N<sub>2</sub>O<sub>2</sub><sup>-</sup>, 383.0359).

Borregomycin F (**5**): Yellow amorphous powder, UV (CHCl<sub>3</sub>)  $\lambda_{\text{max}}$  (log  $\epsilon$ ) 237.0 (4.01), 320.8 (4.18), 400.0 (3.15); IR (ATR)  $\nu_{\text{max}}$  2933, 1684, 1406, 1197, 1141 cm<sup>-1</sup>; NMR (600 MHz, DMSO-*d*<sub>6</sub>) see Table S5; HR-ESI(-)-MS *m/z* 391.9996 [M - H]<sup>-</sup> (calculated for C<sub>20</sub>H<sub>8</sub><sup>35</sup>Cl<sub>2</sub>N<sub>3</sub>O<sub>2</sub><sup>-</sup>, 391.9999).

(+)-ABX-G (**8**): Yellow amorphous powder,  $[\alpha]_{\text{D}}^{23} +19$  (*c* 0.034 CHCl<sub>3</sub>), UV (CHCl<sub>3</sub>)  $\lambda_{\text{max}}$  (log  $\epsilon$ ) 207 (4.49), 227 (4.25), 269 (3.82), 387 (4.00); ECD (MeOH)  $\lambda_{\text{max}}$  ( $\Delta\epsilon$ ) 242 (+18.3), 279 (+4.3), 309 (−1.6), 380 (+0.86); IR (ATR)  $\nu_{\text{max}}$  2898, 2351, 1686, 1203, 1059 cm<sup>−1</sup>; NMR (600 MHz, DMSO-*d*<sub>6</sub>) see Table S8; HR-ESI(+)-MS *m/z* 525.1303 [M + H]<sup>+</sup> (calculated for C<sub>28</sub>H<sub>26</sub><sup>35</sup>ClO<sub>8</sub><sup>+</sup>, 525.1310).

(−)-ABX-K (**9**): Yellow powder,  $[\alpha]_{\text{D}}^{23} -80$  (*c* 0.097 CHCl<sub>3</sub>), UV (CHCl<sub>3</sub>)  $\lambda_{\text{max}}$  (log  $\epsilon$ ) 204 (5.00), 226 (4.70), 277 (4.29), 406 (4.45); ECD (MeOH)  $\lambda_{\text{max}}$  ( $\Delta\epsilon$ ) 242 (−37.2), 280 (−8.3), 307 (+6.2), 371 (−1.6); IR (ATR)  $\nu_{\text{max}}$  2936, 2352, 1681, 1600, 1417, 1359, 1249, 1157 cm<sup>−1</sup>; NMR (600 MHz, DMSO-*d*<sub>6</sub>) see Table S9; HR-ESI(+)-MS *m/z* 495.1198 [M + H]<sup>+</sup> (calculated for C<sub>27</sub>H<sub>24</sub><sup>35</sup>ClO<sub>7</sub><sup>+</sup>, 495.1205).

## 5. Biological screening

Purified metabolites were dissolved in DMSO to provide stock solutions (10,000  $\mu\text{g mL}^{-1}$  or 1,000  $\mu\text{g mL}^{-1}$  depending on the amount of material available). An aliquot of each stock solution was transferred to the first lane of Rows B to G in a 96-well microtitre plate and two-fold serially diluted with DMSO across the 12 lanes of the plate to provide a 2,048-fold concentration gradient. Bioassay medium was added to an aliquot of each test solution to provide a 100-fold dilution into the final bioassay, thus yielding a test range of 100 to 0.05  $\mu\text{g mL}^{-1}$  in 1% DMSO. Row A contained no test compound (as a reference for no inhibition) and Row H was uninoculated (as a reference for complete inhibition).

NS-1 (ATCC TIB-18) mouse myeloma cells were used as indicator of antitumour actives. NS-1 cells were inoculated in 96-well microtitre plates (190  $\mu\text{L}$ ) at 50,000 cells mL<sup>−1</sup> in DMEM (Dulbecco's Modified Eagle Medium) + 10% fetal bovine serum (FBS) + 1% penicillin/streptomycin (10,000 U mL<sup>−1</sup> / 10,000  $\mu\text{g mL}^{-1}$ , Life Technologies Cat. No. 15140122) with resazurin (250  $\mu\text{g mL}^{-1}$ ; 10  $\mu\text{L}$ )

and incubated in 37 °C (5% CO<sub>2</sub>) incubator. The plates were incubated for 96 h during which time the positive control wells change colour from a blue to pink colour. The absorbance of each well was measured at 605 nm using a Spectromax plate reader (Molecular Devices).

*Bacillus subtilis* (ATCC 6633) and *Staphylococcus aureus* (ATCC 25923) were used as indicative species for Gram-positive bacteria, and *Escherichia coli* (ATCC 25922) was used as an indicative species for Gram-negative bacteria. A bacterial suspension (50 mL in 250 mL flask) was prepared in nutrient media by cultivation for 24 h at 250 rpm, 28 °C. The suspension was diluted to an absorbance of 0.01 absorbance units per mL, and 10 µL aliquots were added to the wells of a 96-well microtitre plate, which contained the test compounds dispersed in nutrient broth (Amyl) with resazurin (12.5 µg mL). The plates were incubated at 28 °C for 48 h during which time the positive control wells change colour from a blue to light pink colour. MIC end points were determined visually. The absorbance was measured using Spectromax plate reader (Molecular Devices) at 605 nm and the IC<sub>50</sub> values determined graphically.

The yeasts *Candida albicans* (ATCC 10231) and *Saccharomyces cerevisiae* (ATCC 9763) were used as indicative species for antifungal activity. A yeast suspension (50 mL in 250 mL flask) was prepared in 1% malt extract broth by cultivation for 24 h at 250 rpm, 24 °C. The suspension was diluted to an absorbance of 0.005 and 0.03 absorbance units per mL for *C. albicans* and *S. cerevisiae*, respectively. Aliquots (20 µL and 30 µL) of *C. albicans* and *S. cerevisiae*, respectively were applied to the wells of a 96-well microtitre plate, which contained the test compounds dispersed in malt extract agar containing bromocresol green (50 µg/mL). The plates were incubated at 24 °C for 48 h during which time the positive control wells change colour from a blue to yellow colour. MIC end points were determined visually. The absorbance was measured using Spectromax plate reader (Molecular Devices) at 620 nm and the IC<sub>50</sub> determined graphically.

*Tritrichomonas foetus* was used as an indicative species for inhibitors of animal protozoan pathogen. *T. foetus* (strain KV-1) was inoculated in 96-well microtitre plates (200  $\mu\text{L}$ ) at  $4 \times 10^4$  cells  $\text{mL}^{-1}$  in *T. foetus* medium (0.2% tryptone, Oxoid; 0.1% yeast extract, Difco; 0.25% glucose; 0.1% L-cysteine; 0.1%  $\text{K}_2\text{HPO}_4$ ; 0.1%  $\text{KH}_2\text{PO}_4$ ; 0.1% ascorbic acid; 0.01%  $\text{FeSO}_4 \cdot 7\text{H}_2\text{O}$ ; 1% penicillin/streptomycin (10,000 U  $\text{mL}^{-1}$  / 10,000  $\mu\text{g mL}^{-1}$ , Life Technologies Cat. No. 15140122); 10% new born calf serum, (NBCS, Life Technologies). The plates were incubated in anaerobic jars (Oxoid AG25) containing an Anaerogen satchet (Oxoid AN25) in 37 °C (5%  $\text{CO}_2$ ) incubator. At 72 h, *T. foetus* proliferation was counted and % inhibition graphed to determine the  $\text{IC}_{50}$  values.

## 6. Extraction and sequencing of genomic DNA

Genomic DNA was extracted from *Streptomyces* sp. MST-144321 using a Sigma GenElute Bacterial Genomic DNA Kit. Briefly, a plate culture of MST-144321 was scraped to harvest the cells, which were resuspended in lysozyme solution (200  $\mu\text{L}$ ). The resuspended cells were then incubated at 37 °C for 30 min before adding RNase A solution (20  $\mu\text{L}$ ) and incubating at room temperature for 2 min. Proteinase K (20  $\mu\text{L}$ ) and lysis solution (200  $\mu\text{L}$ ) were then added, followed by incubation at 55 °C for 10 min. The homogeneous mixture was diluted with absolute ethanol (200  $\mu\text{L}$ ) and vortexed. The mixture was then transferred to the binding column and centrifuged at  $6500 \times g$  for 1 min. Finally, the column was washed with wash solution (500  $\mu\text{L}$ ) and centrifuged at  $6500 \times g$  for 1 min. Elution buffer (200  $\mu\text{L}$ ) was added to the centre of the column to elute the genomic DNA.

DNA was sequenced at the Beijing Genome Institute (BGI). Genome sequences of MST-144321 was produced from 150 bp paired-end sequencing on Illumina platform. Poor quality reads were removed using FastQC.<sup>3</sup> The draft genome was assembled and polishing using Unicycler.<sup>4</sup> Biosynthetic Gene Clusters (BGCs) were predicted by antiSMASH version 5.1.1.<sup>5</sup> and further analysed using BLASTP and cblaster.<sup>6</sup> Sequence alignments were generated using Clustal Omega<sup>7</sup> and phylogenetic trees were generated using RAxML version 8<sup>8</sup> and FastTree.<sup>9</sup> Trees were visualised in FigTree.<sup>10</sup>

## 7. Genomic Features of MST-144321

A draft genome of MST-144321 was acquired *via* Illumina sequencing consisting of 49 contigs with an N50 of 530,408. This represents ~6.7 Mb of genomic DNA. Analysis with plasmidSPADES<sup>11</sup> and Bandage<sup>12</sup> did not indicate the presence of plasmids. Multilocus Sequence Typing (MLST)<sup>13, 14</sup> of the strain showed a unique combination in its six housekeeping genes (16S = 27, *atpD* = 14, *gyrB* = 91, *recA* = 15, *rpoB* = 15 and *trpB* = 15), which suggested MST-144321 is a novel strain belonging to the genus *Streptomyces*. Further analysis using autoMLST<sup>15</sup> confirmed this result and revealing that MST-144321 was most closely related to *Streptomyces luteocolor* NBRC 13826 (Figure S73).

## 8. Single-crystal X-ray diffraction analysis

Crystals of svetamycin A (**3**) were obtained by slow evaporation of a solution of **3** in 1:1 MeOH/MeCN. A clear light colourless block-shaped crystal with dimensions  $0.16 \times 0.14 \times 0.05 \text{ mm}^3$  was mounted. Data were collected using a XtaLAB Synergy, Single source at home/near, HyPix diffractometer operating at  $T = 100.00(10) \text{ K}$ . Data were measured using  $\omega$  scans using Cu  $K_{\alpha}$  radiation. The diffraction pattern was indexed and the total number of runs and images was based on the strategy calculation from the program CrysAlisPro (Rigaku, V1.171.41.103a, 2021).<sup>16</sup> The maximum resolution that was achieved was  $Q = 75.702^{\circ}$  ( $0.80 \text{ \AA}$ ). The unit cell was refined using on 22921 reflections, 51% of the observed reflections. Data reduction, scaling and absorption corrections were also performed using CrysAlisPro. The final completeness is 100.00% out to  $75.702^{\circ}$  in  $Q$ . A Gaussian absorption correction was performed based on Gaussian integration over a multifaceted crystal model using spherical harmonics, implemented in SCALE3 ABSPACK scaling algorithm. The absorption coefficient  $m$  of this material is  $1.780 \text{ mm}^{-1}$  at this wavelength ( $\lambda = 1.54184 \text{ \AA}$ ) and the minimum and maximum transmissions are 0.844 and 1.000.

The structure was solved and the space group  $P2_12_12_1$  (# 19) determined by the ShelXT 2018/2 structure solution program<sup>17</sup> using dual methods and refined by full matrix least squares minimisation on  $F^2$  using version 2018/3 of XL.<sup>18</sup> All non-hydrogen atoms were refined anisotropically. Hydrogen

atom positions were calculated geometrically and refined using the riding model. There is a single molecule in the asymmetric unit, which is represented by the reported sum formula. Z is 4 and Z' is 1. The Flack parameter was refined to 0.000(7). Determination of absolute structure using Bayesian statistics on Bijvoet differences using the Olex2<sup>19</sup> results in 0.006(6). This provides absolute configuration of the molecule. All crystallographic data have been deposited with the CCDC (2087152) and can be obtained free of charge via <https://www.ccdc.cam.ac.uk/structures/>, or from the Cambridge Crystallographic Data Centre, 12 Union Road, Cambridge CB2 1EZ, UK (fax +441223336033; email [deposit@ccdc.cam.ac.uk](mailto:deposit@ccdc.cam.ac.uk)).

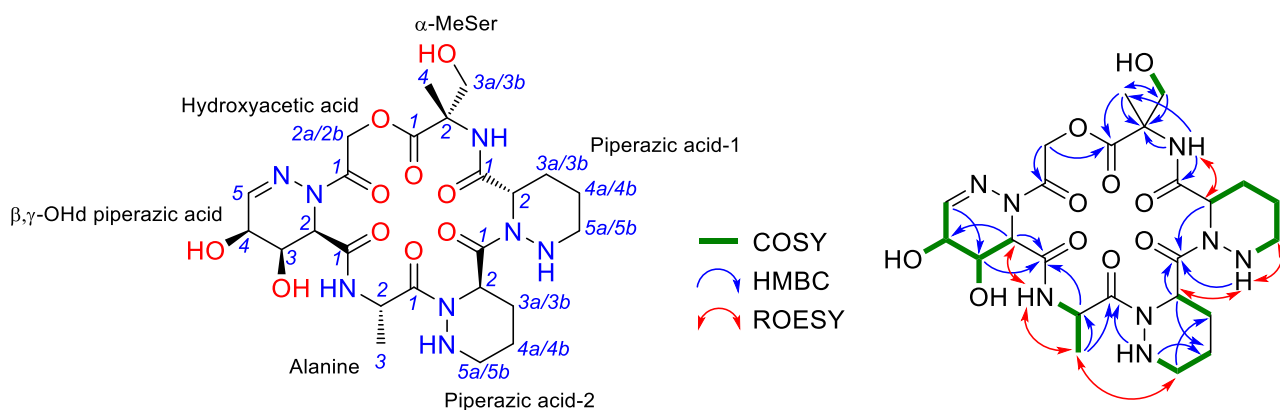

**Table S1.**  $^1\text{H}$  (600 MHz) and  $^{13}\text{C}$  (150 MHz) NMR data for deschlorosvetamycin A (1) in  $\text{DMSO-}d_6$

| Pos.                                                                                   | $\delta_{\text{H}}$ , mult ( $J$ in Hz) | $\delta_{\text{C}}$ | $^1\text{H}$ - $^{13}\text{C}$ HMBC | COSY       | ROESY                          |
|----------------------------------------------------------------------------------------|-----------------------------------------|---------------------|-------------------------------------|------------|--------------------------------|
| <b><math>\alpha</math>-Methyl Serine (<math>\alpha</math>-MeSer)</b>                   |                                         |                     |                                     |            |                                |
| 1                                                                                      |                                         | 172.3               |                                     |            |                                |
| 2                                                                                      |                                         | 61.0                |                                     |            |                                |
| 3a                                                                                     | 3.77, dd (11.3, 9.1)                    | 63.7                | 1, 4                                | 3-OH       | 4                              |
| 3b                                                                                     | 3.85, dd (11.3, 5.3)                    |                     | 1, 4                                | 3-OH       | 4                              |
| 4                                                                                      | 1.46, s                                 | 19.3                | 1, 2, 3                             |            |                                |
| 2-NH                                                                                   | 7.42, s                                 |                     | 1, 2, 4, 1 <sub>pip-1</sub>         |            |                                |
| 3-OH                                                                                   | 4.08, dd (9.1, 5.3)                     |                     |                                     | 3a/b       |                                |
| <b>Piperazic acid-1 (Pip-1)</b>                                                        |                                         |                     |                                     |            |                                |
| 1                                                                                      |                                         | 169.7               |                                     |            |                                |
| 2                                                                                      | 4.91, br d (5.6)                        | 50.5                | 1, 3, 4, 1 <sub>pip-2</sub>         | 3a/b       | 3a/b, 2-NH $_{\alpha}$ -MeSer  |
| 3a                                                                                     | 1.64, m                                 | 23.6                | 1                                   | 2, 4a      | 2, 4a                          |
| 3b                                                                                     | 2.08, m                                 |                     |                                     | 2          | 2                              |
| 4a                                                                                     | 1.36, m                                 | 20.3                |                                     | 3a         | 5b                             |
| 4b                                                                                     | 1.79, m                                 |                     |                                     | 5a/b       | 5b                             |
| 5a                                                                                     | 2.60, dddd (15.9, 13.0, 10.5, 3.0)      | 46.5                |                                     | 4b, 5-NH   |                                |
| 5b                                                                                     | 3.01, m                                 |                     |                                     | 4b         | 5-NH                           |
| 5-NH                                                                                   | 4.47, br d (15.9)                       |                     | 1 <sub>pip-2</sub>                  | 5a         | 4b, 5b, 2 <sub>pip-2</sub>     |
| <b>Piperazic acid-2 (Pip-2)</b>                                                        |                                         |                     |                                     |            |                                |
| 1                                                                                      |                                         | 173.3               |                                     |            |                                |
| 2                                                                                      | 5.55, d (5.5)                           | 47.6                | 1, 3, 4                             | 3a/b       | 3ab, 5-NH <sub>Pip-1</sub>     |
| 3a                                                                                     | 1.75, m                                 | 24.7                | 1, 2, 4, 5                          | 2          | 5a                             |
| 3b                                                                                     | 1.92, m                                 |                     |                                     | 2          |                                |
| 4a                                                                                     | 1.50, m                                 | 21.0                |                                     |            | 5a/b                           |
| 4b                                                                                     | 1.56, m                                 |                     |                                     |            | 5a/b                           |
| 5a                                                                                     | 2.60, dddd, (15.9, 13.0, 10.5, 3.1)     | 46.8                | 3, 4                                | 4a/b       | 3 <sub>Ala</sub>               |
| 5b                                                                                     | 3.01, m                                 |                     | 3, 4                                | 4a/b       | 5-NH                           |
| 5-NH                                                                                   | 4.94, br d (12.7)                       |                     | 4, 1 <sub>Ala</sub>                 | 5a/b       | 4b, 5b                         |
| <b>Alanine (Ala)</b>                                                                   |                                         |                     |                                     |            |                                |
| 1                                                                                      |                                         | 172.5               |                                     |            |                                |
| 2                                                                                      | 5.16, dq (7.3, 6.8)                     | 44.3                | 3, 1 $_{\beta,\gamma}$ -OHdPip      | 3, 2-NH    | 3, 2-NH                        |
| 3                                                                                      | 1.16, d (6.8)                           | 18.3                | 1, 2                                | 2          | 2, 2-NH                        |
| 2-NH                                                                                   | 8.02, d (7.3)                           |                     | 1 $_{\beta,\gamma}$ -OHdPip         | 2          | 3, 2 $_{\beta,\gamma}$ -OHdPip |
| <b><math>\beta,\gamma</math>-OHd piperazic acid (<math>\beta,\gamma</math>-OHdPip)</b> |                                         |                     |                                     |            |                                |
| 1                                                                                      |                                         | 166.5               |                                     |            |                                |
| 2                                                                                      | 4.86, br d (5.8)                        | 56.2                | 1, 3, 4                             | 3          | 3, 4, 2-NH <sub>Ala</sub>      |
| 3                                                                                      | 4.02, ddd (5.8, 4.2, 4.0)               | 63.4                | 1                                   | 2, 4, 3-OH | 2, 4, 3-OH                     |
| 4                                                                                      | 3.90, ddd (9.5, 4.0, 2.9)               | 61.7                | 3                                   | 3, 5, 4-OH | 3, 5, 4-OH                     |
| 5                                                                                      | 7.02, d (2.9)                           | 146.7               | 3, 4                                | 4          | 4, 4-OH                        |
| 3-OH                                                                                   | 5.37, d (4.2)                           |                     | 2                                   | 3          | 3                              |
| 4-OH                                                                                   | 6.06, d (9.5)                           |                     | 3, 4                                | 4          | 4                              |
| <b>Hydroxyacetic acid (Haa)</b>                                                        |                                         |                     |                                     |            |                                |
| 1                                                                                      |                                         | 166.9               |                                     |            |                                |
| 2a                                                                                     | 4.76, d (15.9)                          | 62.3                | 1, 1 $_{\alpha}$ -MeSer             |            |                                |
| 2b                                                                                     | 5.23, d (15.9)                          |                     | 1, 1 $_{\alpha}$ -MeSer             |            |                                |

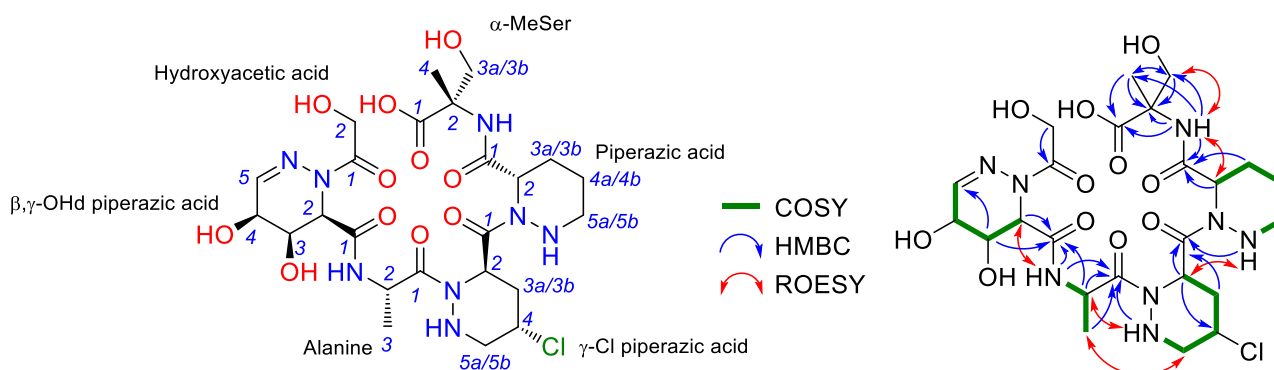

**Table S2.**  $^1\text{H}$  (600 MHz) and  $^{13}\text{C}$  (150 MHz) NMR data for svetamycin H (2) in  $\text{DMSO-}d_6$

| Pos.                                                                                    | $\delta_{\text{H}}$ , mult (J in Hz) | $\delta_{\text{C}}$ | $^1\text{H-}^{13}\text{C}$ HMBC         | COSY       | ROESY                                         |
|-----------------------------------------------------------------------------------------|--------------------------------------|---------------------|-----------------------------------------|------------|-----------------------------------------------|
| <b><math>\alpha</math>-Methyl Serine (<math>\alpha</math>-MeSer)</b>                    |                                      |                     |                                         |            |                                               |
| 1                                                                                       |                                      | 173.6               |                                         |            |                                               |
| 2                                                                                       |                                      | 60.0                |                                         |            |                                               |
| 3a                                                                                      | 3.54 <sup>a</sup> , d (10.5)         | 64.9                | 1, 2, 4                                 |            | 4, 2-NH                                       |
| 3b                                                                                      | 3.61, d (10.5)                       |                     | 1, 2, 4                                 |            | 4, 2-NH                                       |
| 4                                                                                       | 1.34, s                              | 19.8                | 1, 2, 3                                 |            | 3a/b, 2-NH                                    |
| 2-NH                                                                                    | 8.04, s                              |                     | 1, 2, 3, 4, 1 <sub>Pip</sub>            |            | 3a/b, 4, 2 <sub>Pip</sub> , 3b <sub>Pip</sub> |
| 1-OH                                                                                    | 12.35, br s                          |                     |                                         |            |                                               |
| 3-OH                                                                                    | <sup>b</sup>                         |                     |                                         |            |                                               |
| <b>Piperazine acid (Pip)</b>                                                            |                                      |                     |                                         |            |                                               |
| 1                                                                                       |                                      | 170.6               |                                         |            |                                               |
| 2                                                                                       | 4.93, dd (5.4, 1.4)                  | 50.1                | 1, 3, 4                                 | 3a/b       | 3ab, 2-NH $_{\alpha\text{-MeSer}}$            |
| 3a                                                                                      | 1.82, m                              | 26.8                | 1                                       | 2, 4b      | 2, 4a                                         |
| 3b                                                                                      | 2.08, m                              |                     |                                         | 2, 4a      | 2, 4a/b, 2-NH $_{\alpha\text{-MeSer}}$        |
| 4a                                                                                      | 1.46, m                              | 20.5                |                                         | 3b         | 3a/b, 5ab                                     |
| 4b                                                                                      | 1.55, m                              |                     |                                         | 3a, 5a     | 3b, 5b, 5-NH                                  |
| 5a                                                                                      | 2.59, m                              | 46.6                |                                         | 4b, 5-NH   | 4a                                            |
| 5b                                                                                      | 3.01, m                              |                     |                                         | 5-NH       | 4ab, 5-NH                                     |
| 5-NH                                                                                    | 5.08, dd (11.0, 1.9)                 |                     | 1 $_{\gamma\text{-ClPip}}$              | 5a/b       | 4b, 5b, 2 $_{\gamma\text{-ClPip}}$            |
| <b><math>\gamma</math>-ClPiperazine acid (<math>\gamma</math>-ClPip)</b>                |                                      |                     |                                         |            |                                               |
| 1                                                                                       |                                      | 171.0               |                                         |            |                                               |
| 2                                                                                       | 5.70, dd (6.5, 2.2)                  | 50.2                | 1, 3, 4                                 | 3a/b       | 3ab, 5-NH <sub>Pip</sub>                      |
| 3a                                                                                      | 2.02, ddd (13.0, 13.0, 6.5)          | 35.3                | 1, 2, 4                                 | 2, 4       | 2, 5a                                         |
| 3b                                                                                      | 2.44, ddd (13.0, 4.4, 2.2)           |                     |                                         | 2, 4       | 2, 4                                          |
| 4                                                                                       | 4.11, dddd (13.0, 10.7, 4.4, 4.4)    | 52.7                |                                         | 3a/b, 5a/b | 3b, 5b, 5-NH                                  |
| 5a                                                                                      | 2.65, ddd (12.5, 10.7, 2.2)          | 53.8                | 4                                       | 4, 5-NH    | 3a, 3 <sub>Ala</sub>                          |
| 5b                                                                                      | 3.32, m                              |                     | 4                                       | 4, 5-NH    | 4, 5-NH                                       |
| 5-NH                                                                                    | 5.47, dd (12.5, 1.8)                 |                     | 1 <sub>Ala</sub>                        | 5a/b       | 4, 5b, 2 <sub>Ala</sub>                       |
| <b>Alanine (Ala)</b>                                                                    |                                      |                     |                                         |            |                                               |
| 1                                                                                       |                                      | 173.1               |                                         |            |                                               |
| 2                                                                                       | 5.05, dq (8.4, 6.8)                  | 45.4                | 1, 3, 1 $_{\beta,\gamma\text{-OHdPip}}$ | 3, 2-NH    | 3, 2-NH, 5-NH $_{\gamma\text{-ClPip}}$        |
| 3                                                                                       | 1.15, d (6.8)                        | 18.1                | 1, 2                                    | 2          | 2, 2-NH, 5a $_{\gamma\text{-ClPip}}$          |
| 2-NH                                                                                    | 7.61, d (8.4)                        |                     | 1, 1 $_{\beta,\gamma\text{-OHdPip}}$    | 2          | 2, 3, 2 $_{\beta,\gamma\text{-OHdPip}}$       |
| <b><math>\beta,\gamma</math>-OHd piperazine acid (<math>\beta,\gamma</math>-OHdPip)</b> |                                      |                     |                                         |            |                                               |
| 1                                                                                       |                                      | 165.5               |                                         |            |                                               |
| 2                                                                                       | 4.71, br d (5.3)                     | 55.4                | 1, 3, 4                                 | 3          | 3, 2-NH <sub>Ala</sub>                        |
| 3                                                                                       | 3.99, dd (5.3, 1.0)                  | 65.3                | 1, 5                                    | 2, 4       | 2                                             |
| 4                                                                                       | 3.95, dd (2.9, 1.0)                  | 62.5                | 5                                       | 3, 5       | 2, 5                                          |
| 5                                                                                       | 6.84, d (2.9)                        | 144.6               | 3, 4                                    | 4          | 4                                             |
| 3-OH                                                                                    | <sup>b</sup>                         |                     |                                         |            |                                               |
| 4-OH                                                                                    | <sup>b</sup>                         |                     |                                         |            |                                               |
| <b>Hydroxyacetic acid (Haa)</b>                                                         |                                      |                     |                                         |            |                                               |
| 1                                                                                       |                                      | 172.6               |                                         |            |                                               |
| 2a                                                                                      | 4.29, d (17.3)                       | 60.2                | 1                                       |            |                                               |
| 2b                                                                                      | 4.34, d (17.3)                       |                     |                                         |            |                                               |
| 2-OH                                                                                    | <sup>b</sup>                         |                     |                                         |            |                                               |

<sup>a</sup> resonance obscured by water peak; <sup>b</sup> not observed



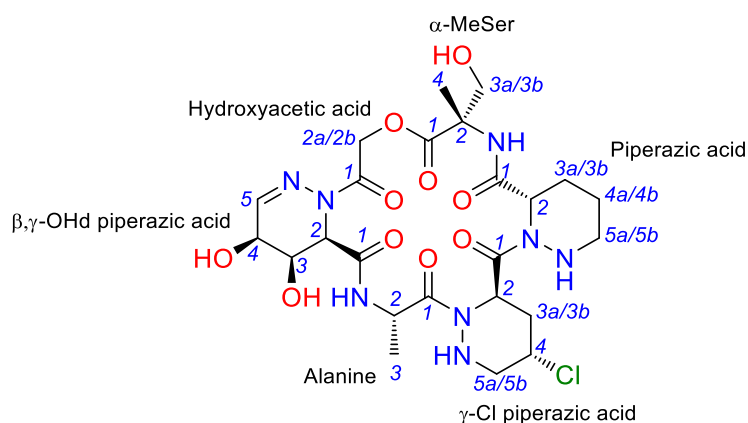

**Table S3.**  $^1\text{H}$  (600 MHz) and  $^{13}\text{C}$  (150 MHz) NMR data for svetamycin A (**3**) in  $\text{DMSO-}d_6$

| Pos.                                                                                   | $\delta_{\text{H}}$ , mult ( $J$ in Hz) | $\delta_{\text{C}}$ | $^1\text{H-}^{13}\text{C}$ HMBC | COSY        | ROESY                                                      |
|----------------------------------------------------------------------------------------|-----------------------------------------|---------------------|---------------------------------|-------------|------------------------------------------------------------|
| <b><math>\alpha</math>-Methyl Serine (<math>\alpha</math>-MeSer)</b>                   |                                         |                     |                                 |             |                                                            |
| 1                                                                                      |                                         | 171.8               |                                 |             |                                                            |
| 2                                                                                      |                                         | 60.5                |                                 |             |                                                            |
| 3a                                                                                     | 3.67, d (11.0)                          | 64.2                | 1, 2, 4                         |             | 4                                                          |
| 3b                                                                                     | 3.78, d (11.0)                          |                     | 1, 2, 4                         |             | 4                                                          |
| 4                                                                                      | 1.41, s                                 | 19.6                | 1, 2, 3                         |             |                                                            |
| 2-NH                                                                                   | 7.59, s                                 |                     | 1, 2, 3, 4, 1 <sub>pip</sub>    |             | 4, 3 <sub>ab</sub> , 2 <sub>pip</sub> , 3 <sub>b</sub> pip |
| 3-OH                                                                                   |                                         |                     |                                 |             |                                                            |
| <b>Piperazic acid (Pip)</b>                                                            |                                         |                     |                                 |             |                                                            |
| 1                                                                                      |                                         | 168.9               |                                 |             |                                                            |
| 2                                                                                      | 4.89, br d, (2.6)                       | 51.2                | 1, 3, 4                         | 3a/b, 4a/b  | 3a/b, 4b, 2-NH $\alpha$ -MeSer                             |
| 3a                                                                                     | 1.71 <sup>a</sup> , m                   | 24.3                | 1, 5                            | 2, 4a/b     | 2, 4a,                                                     |
| 3b                                                                                     | 2.18, m                                 |                     |                                 | 2, 4a/b     | 2, 2-NH $\alpha$ -MeSer                                    |
| 4a                                                                                     | 1.33, m                                 | 20.3                | 2                               | 3a/b        | 3b, 4b, 5a/b,                                              |
| 4b                                                                                     | 1.71 <sup>a</sup> , m                   |                     |                                 | 3a/b        | 2, 3b, 4a, 5b                                              |
| 5a                                                                                     | 2.60 <sup>b</sup> , m                   | 46.5                |                                 | 4a/b        | 4a, 5b,                                                    |
| 5b                                                                                     | 2.93, br d (12.9)                       |                     | 3                               | 4a/b, 3b    | 4a/b, 5a, 5-NH                                             |
| 5-NH                                                                                   | 4.61 <sup>c</sup>                       |                     |                                 |             | 3a, 5b                                                     |
| <b><math>\gamma</math>-Cl piperazic acid (<math>\gamma</math>-ClPip)</b>               |                                         |                     |                                 |             |                                                            |
| 1                                                                                      |                                         | 171.4               |                                 |             |                                                            |
| 2                                                                                      | 5.71, dd (5.4, 2.4)                     | 50.1                | 1, 3, 4                         | 3a/b        | 3a/b, 5-NH <sub>pip</sub>                                  |
| 3a                                                                                     | 1.86, td (12.7, 6.1)                    | 34.9                | 1, 2, 4, 5                      | 2, 4        | 3b                                                         |
| 3b                                                                                     | 2.40, ddd, (12.7, 4.4, 2.4)             |                     |                                 | 2, 4        | 2, 3a, 4                                                   |
| 4                                                                                      | 4.35, tt, (11.3, 4.5)                   | 52.6                |                                 | 3a/b, 5a/b, | 3b, 5b                                                     |
| 5a                                                                                     | 2.65 <sup>b</sup>                       | 54.3                | 3, 4                            | 4           | 5b                                                         |
| 5b                                                                                     | 3.35 <sup>c</sup>                       |                     | 3, 4                            | 4           | 4, 5a, NH-5                                                |
| 5-NH                                                                                   | 5.20, d (12.5)                          |                     | 1 <sub>Ala</sub>                | 5ab         | 4, 5b                                                      |
| <b>Alanine (Ala)</b>                                                                   |                                         |                     |                                 |             |                                                            |
| 1                                                                                      |                                         | 172.3               |                                 |             |                                                            |
| 2                                                                                      | 5.32 <sup>d</sup> , dq (8.1, 7.0)       | 43.2                | 1, 3, 1 $\beta,\gamma$ -OHdPip  | 3, 2-NH     | 3, 2-NH                                                    |
| 3                                                                                      | 1.16, d (7.0)                           | 18.1                | 1, 2                            | 2           | 2, 5b, 2-NH                                                |
| 2-NH                                                                                   | 8.11, d (8.1)                           |                     | 1, 2, 1 $\beta,\gamma$ -OHdPip  | 2           | 3, 2 $\beta,\gamma$ -OHdPip                                |
| <b><math>\beta,\gamma</math>-OHd piperazic acid (<math>\beta,\gamma</math>-OHdPip)</b> |                                         |                     |                                 |             |                                                            |
| 1                                                                                      |                                         | 166.5               |                                 |             |                                                            |
| 2                                                                                      | 4.71, d (5.3)                           | 56.9                | 1, 3, 4                         | 3           | 3, 4, 2-NH <sub>Ala</sub>                                  |
| 3                                                                                      | 4.03, dd, (5.3, 4.6)                    | 63.8                | 1, 4, 5                         |             | 2, 4                                                       |
| 4                                                                                      | 3.91, dd (4.6, 2.4)                     | 62.6                | 2, 3, 5                         |             | 2, 3, 5                                                    |
| 5                                                                                      | 6.95, d (2.4)                           | 147.0               | 3, 4                            | 4           | 4                                                          |
| 3-OH                                                                                   |                                         |                     |                                 |             |                                                            |
| 4-OH                                                                                   |                                         |                     |                                 |             |                                                            |
| <b>Hydroxyacetic acid (Haa)</b>                                                        |                                         |                     |                                 |             |                                                            |
| 1                                                                                      |                                         | 166.7               |                                 |             |                                                            |
| 2a                                                                                     | 4.61 <sup>c</sup>                       | 61.7                | 1, 1 $\alpha$ -MeSer            |             |                                                            |
| 2b                                                                                     | 5.32 <sup>d</sup>                       |                     | 1, 1 $\alpha$ -MeSer            |             |                                                            |

<sup>a-d</sup> resonances overlapping; <sup>e</sup> resonance obscured by water peak

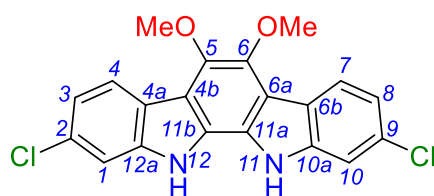

**Table S4.**  $^1\text{H}$  (600 MHz) and  $^{13}\text{C}$  (150 MHz) NMR data for borregomycin E (**4**) in  $\text{DMSO-}d_6$

| Pos.     | $\delta_{\text{H}}$ , mult ( $J$ in Hz) | $\delta_{\text{C}}$ | $^1\text{H-}^{13}\text{C}$ HMBC | COSY | ROESY        |
|----------|-----------------------------------------|---------------------|---------------------------------|------|--------------|
| 1/10     | 7.76, d (1.8)                           | 111.2               | 2/9, 3/8, 4a/6b                 |      | 11/12-NH     |
| 2/9      |                                         | 129.0               |                                 |      |              |
| 3/8      | 7.21, dd (8.3, 1.8)                     | 119.2               | 1/10, 2/9, 4a/6b                | 4/7  | 4/7          |
| 4/7      | 8.15, d (8.3)                           | 122.6 <sup>a</sup>  | 2/9, 4b/6a, 10a/12a             | 3/8  | 3/8, 5/6-OMe |
| 4a/6b    |                                         | 121.2               |                                 |      |              |
| 4b/6a    |                                         | 114.0               |                                 |      |              |
| 5/6      |                                         | 140.1               |                                 |      |              |
| 10a/12a  |                                         | 139.7               |                                 |      |              |
| 11/12-NH | 11.27, s                                |                     | 4a/6b, 4b/6a, 11b/11a, 10a/12a  |      | 1/10         |
| 11a/11b  |                                         | 122.6 <sup>a</sup>  |                                 |      |              |
| 5/6-OMe  | 4.05, s                                 | 60.7                | 5/6                             |      | 4/7          |

<sup>a</sup> resonances overlapping

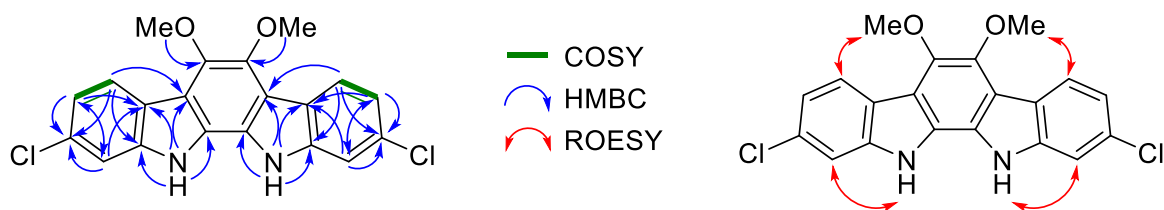

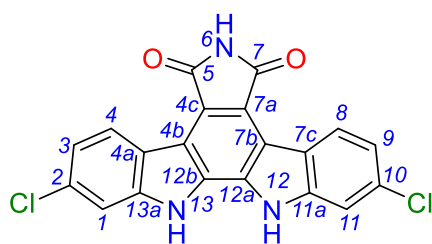

**Table S5.**  $^1\text{H}$  (600 MHz) and  $^{13}\text{C}$  (150 MHz) NMR data for borregomycin F (**5**) in  $\text{DMSO-}d_6$

| Pos.     | $\delta_{\text{H}}$ , mult ( $J$ in Hz) | $\delta_{\text{C}}$ | $^1\text{H-}^{13}\text{C}$ HMBC | COSY | ROESY    |
|----------|-----------------------------------------|---------------------|---------------------------------|------|----------|
| 1/11     | 7.94, d (1.9)                           | 111.9               | 2/10, 3/9, 4a/7c                |      | 12/13-NH |
| 2/10     |                                         | 131.3               |                                 |      |          |
| 3/9      | 7.39, dd (8.4, 1.9)                     | 120.6               | 1/11, 2/10, 4a/7c               | 4/8  | 4/8      |
| 4/8      | 8.93, d (8.4)                           | 125.4               | 2/10, 4b/7b, 11a/13a            | 3/9  | 3/9      |
| 4a/7c    |                                         | 120.3               |                                 |      |          |
| 4b/7b    |                                         | 115.1               |                                 |      |          |
| 4c/7a    |                                         | 120.1               |                                 |      |          |
| 5/7      |                                         | 171.0               |                                 |      |          |
| 11a/13a  |                                         | 140.8               |                                 |      |          |
| 12a/12b  |                                         | 129.3               |                                 |      |          |
| 12/13-NH | 11.93, s                                |                     | 4a/7c, 4b/7b, 12a/b, 11a/13a    |      | 1/11     |
| 6-NH     | 11.07, s                                |                     | 5/7, 4c/7a                      |      |          |

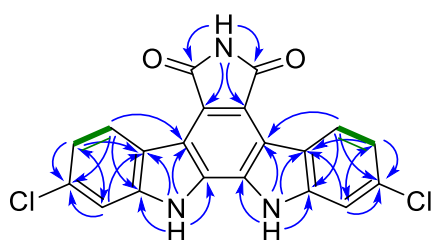

— COSY  
 HMBC  
 ROESY

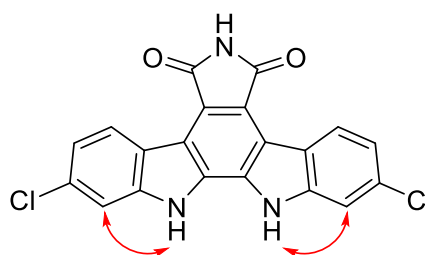

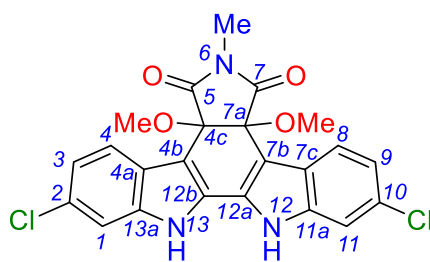

**Table S6.**  $^1\text{H}$  (600 MHz) and  $^{13}\text{C}$  (150 MHz) NMR data for borregomycin B (**6**) in  $\text{DMSO-}d_6$

| Pos.      | $\delta_{\text{H}}$ , mult (J in Hz) | $\delta_{\text{C}}$ | $^1\text{H-}^{13}\text{C}$ HMBC | COSY | ROESY     |
|-----------|--------------------------------------|---------------------|---------------------------------|------|-----------|
| 1/11      | 7.67, d (1.9)                        | 111.8               | 2, 3, 4a                        |      | 12/13-NH  |
| 2/10      |                                      | 127.0               |                                 |      |           |
| 3/9       | 7.15, dd (8.5, 1.9)                  | 120.9               | 1, 4a                           | 4    | 4         |
| 4/8       | 7.92, d (8.5)                        | 122.3               | 2, 13a                          | 3    | 3, 4c-OMe |
| 4a/7c     |                                      | 124.8               |                                 |      |           |
| 4b/7b     |                                      | 106.1               |                                 |      |           |
| 4c/7a     |                                      | 80.5                |                                 |      |           |
| 5/7       |                                      | 173.1               |                                 |      |           |
| 11a/13a   |                                      | 137.3               |                                 |      |           |
| 12a/12b   |                                      | 128.3               |                                 |      |           |
| 12/13-NH  | 11.60, s                             |                     | 4a, 4b, 12b, 13a                |      | 1         |
| 6-NMe     | 2.93, s                              | 25.0                | 5                               |      |           |
| 4c/7a-OMe | 3.28, s                              | 53.9                | 4c                              |      | 4         |

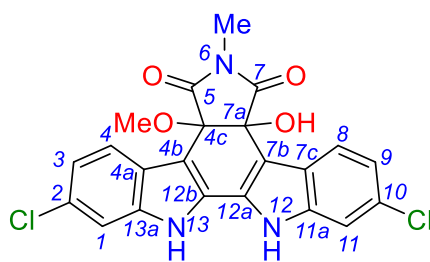

**Table S7.**  $^1\text{H}$  (600 MHz) and  $^{13}\text{C}$  (150 MHz) NMR data for borregomycin C (**7**) in  $\text{DMSO-}d_6$

| Pos.   | $\delta_{\text{H}}$ , mult ( $J$ in Hz) | $\delta_{\text{C}}$ | $^1\text{H-}^{13}\text{C}$ HMBC | COSY | ROESY     |
|--------|-----------------------------------------|---------------------|---------------------------------|------|-----------|
| 1      | 7.64, d (1.9)                           | 111.6               | 2, 3, 4a                        |      | 13-NH     |
| 2      |                                         | 126.9               |                                 |      |           |
| 3      | 7.12, dd (8.5, 1.9)                     | 120.4               | 1, 4a                           | 4    | 4         |
| 4      | 7.96, d (8.5)                           | 122.0               | 2, 13a                          | 3    | 3, 4c-OMe |
| 4a     |                                         | 125.3               |                                 |      |           |
| 4b     |                                         | 104.2               |                                 |      |           |
| 4c     |                                         | 80.0                |                                 |      |           |
| 5      |                                         | 174.2               |                                 |      |           |
| 7      |                                         | 174.6               |                                 |      |           |
| 7a     |                                         | 76.4                |                                 |      |           |
| 7b     |                                         | 109.9               |                                 |      |           |
| 7c     |                                         | 125.0               |                                 |      |           |
| 8      | 7.99, d (8.5)                           | 122.8               | 10, 7b, 11b                     | 9    |           |
| 9      | 7.14, dd (8.5, 1.9)                     | 120.9               | 7c, 11                          | 8    |           |
| 10     |                                         | 126.8               |                                 |      |           |
| 11     | 7.66, d (1.9)                           | 111.8               | 7c, 9                           |      | 12-NH     |
| 11a    |                                         | 137.2               |                                 |      |           |
| 12a    |                                         | 130.1               |                                 |      |           |
| 12b    |                                         | 126.2               |                                 |      |           |
| 12-NH  | 11.61, s                                |                     | 4a, 4b, 12b, 13a                |      | 11        |
| 13-NH  | 11.42, s                                |                     | 7b, 7c, 11a, 12a                |      | 1         |
| 13a    |                                         | 137.3               |                                 |      |           |
| 6-NMe  | 2.84, s                                 | 24.9                | 5                               |      |           |
| 4c-OMe | 2.96, s                                 | 52.3                | 4c                              |      | 4         |

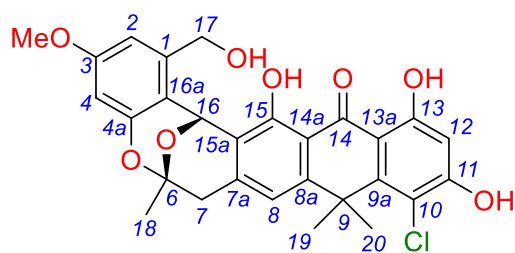

**Table S8.**  $^1\text{H}$  (600 MHz) and  $^{13}\text{C}$  (150 MHz) NMR data for (+)-ABX-G (**8**) in  $\text{DMSO-}d_6$

| Pos.  | $\delta_{\text{H}}$ , mult ( $J$ in Hz) | $\delta_{\text{C}}$ | $^1\text{H-}^{13}\text{C}$ HMBC | COSY  | ROESY     |
|-------|-----------------------------------------|---------------------|---------------------------------|-------|-----------|
| 1     |                                         | 140.6               |                                 |       |           |
| 2     | 6.61, d (2.6)                           | 105.5               | 3, 4, 16a                       |       | 3-OMe     |
| 3     |                                         | 159.3               |                                 |       |           |
| 3-OMe | 3.66, s                                 | 55.0                |                                 |       | 2, 4      |
| 4     | 6.28, d (2.6)                           | 99.9                | 2, 3, 4a, 16a                   |       | 3-OMe     |
| 4a    |                                         | 151.9               |                                 |       |           |
| 6     |                                         | 98.0                |                                 |       |           |
| 7     | 3.11, d (18.9)<br>3.35, d (18.9)        | 39.9                |                                 |       | 8         |
| 7a    |                                         | 142.2               |                                 |       |           |
| 8     | 7.14, s                                 | 118.2               | 7, 14a, 15a                     |       | 7, 19, 20 |
| 8a    |                                         | 148.6               |                                 |       |           |
| 9     |                                         | 39.5                |                                 |       |           |
| 9a    |                                         | 152.5               |                                 |       |           |
| 10    |                                         | 112.0               |                                 |       |           |
| 11    |                                         | 162.4               |                                 |       |           |
| 12    | 6.54, s                                 | 102.4               | 10, 13, 13a                     |       |           |
| 13    |                                         | 163.7               |                                 |       |           |
| 13-OH | 13.26, s                                |                     | 12, 13, 13a                     |       |           |
| 13a   |                                         | 107.6               |                                 |       |           |
| 14    |                                         | 190.4               |                                 |       |           |
| 14a   |                                         | 109.7               |                                 |       |           |
| 15    |                                         | 156.1               |                                 |       |           |
| 15-OH | 13.20, s                                |                     | 14a, 15, 15a                    |       |           |
| 15a   |                                         | 122.1               |                                 |       |           |
| 16    | 6.24, s                                 | 64.6                | 1, 4a, 6, 7a, 15, 15a, 16a      |       | 17b       |
| 16a   |                                         | 113.0               |                                 |       |           |
| 17a   | 4.54, dd (14.4, 5.7)                    | 59.7                | 1, 2, 16a                       | 17-OH |           |
| 17b   | 4.91, dd (14.4, 5.7)                    |                     | 1, 2, 16a                       | 17-OH | 16        |
| 17-OH | 5.09, t (5.7)                           |                     |                                 | 17a/b |           |
| 18    | 1.63, s                                 | 27.3                | 6, 7                            |       |           |
| 19    | 1.90, s                                 | 27.9                | 8a, 9, 9a, 20                   |       | 8         |
| 20    | 1.83, s                                 | 28.1                | 8a, 9, 9a, 19                   |       | 8         |

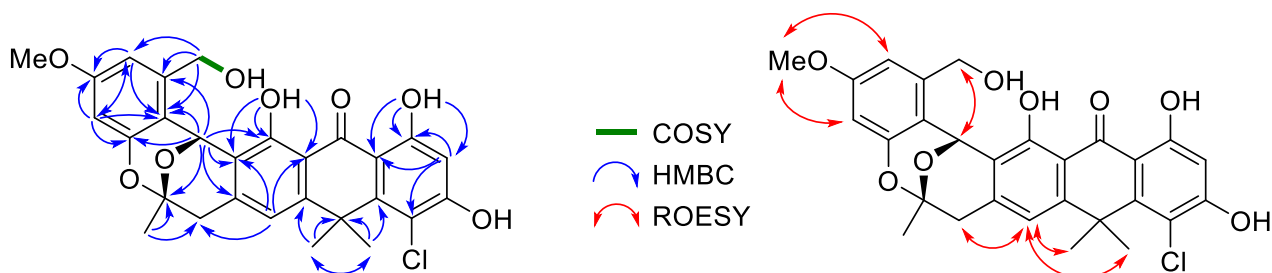

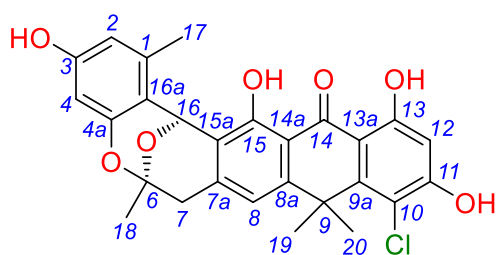

**Table S9.**  $^1\text{H}$  (600 MHz) and  $^{13}\text{C}$  (150 MHz) NMR data for (-)-ABX-K (**9**) in  $\text{DMSO-}d_6$

| Pos.  | $\delta_{\text{H}}$ , mult ( $J$ in Hz) | $\delta_{\text{C}}$ | $^1\text{H-}^{13}\text{C}$ HMBC | ROESY     |
|-------|-----------------------------------------|---------------------|---------------------------------|-----------|
| 1     |                                         | 135.7               |                                 |           |
| 2     | 6.15, d (2.4)                           | 110.0               | 1, 3, 4, 17                     | 3-OH      |
| 3     |                                         | 157.0               |                                 |           |
| 3-OH  | 9.26, s                                 |                     | 2, 3, 4                         | 2, 4      |
| 4     | 6.04, d (2.4)                           | 100.6               | 2, 3, 4a, 16a                   | 3-OH      |
| 4a    |                                         | 151.9               |                                 |           |
| 6     |                                         | 97.6                |                                 |           |
| 7     | 3.06, d (18.9)<br>3.32, d (18.9)        | 39.9                | 6, 7a, 8, 15a                   | 8, 18     |
| 7a    |                                         | 142.4               |                                 |           |
| 8     | 7.13, s                                 | 118.1               | 7, 14, 14a, 15a                 | 7, 19, 20 |
| 8a    |                                         | 148.6               |                                 |           |
| 9     |                                         | 39.4                |                                 |           |
| 9a    |                                         | 152.4               |                                 |           |
| 10    |                                         | 111.9               |                                 |           |
| 11    |                                         | 162.0               |                                 |           |
| 11-OH | 11.75, br s                             |                     |                                 |           |
| 12    | 6.55, s                                 | 102.3               | 10, 11, 13, 13a, 14             | 13-OH     |
| 13    |                                         | 163.7               |                                 |           |
| 13-OH | 13.27, s                                |                     | 12, 13, 13a                     | 12        |
| 13a   |                                         | 107.5               |                                 |           |
| 14    |                                         | 190.3               |                                 |           |
| 14a   |                                         | 109.6               |                                 |           |
| 15    |                                         | 156.1               |                                 |           |
| 15-OH | 13.17, s                                |                     | 14a, 15, 15a                    | 16, 17    |
| 15a   |                                         | 122.6               |                                 |           |
| 16    | 6.14, s                                 | 64.3                | 1, 4a, 6, 7a, 15, 15a, 16a      | 15-OH, 17 |
| 16a   |                                         | 113.0               |                                 |           |
| 17    | 2.33, s                                 | 18.8                | 1, 2, 16a                       | 15-OH, 16 |
| 18    | 1.60, s                                 | 27.3                | 6, 7                            | 7         |
| 19    | 1.90, s                                 | 27.8                | 8a, 9, 9a, 20                   | 8         |
| 20    | 1.83, s                                 | 28.1                | 8a, 9, 9a, 19                   | 8         |

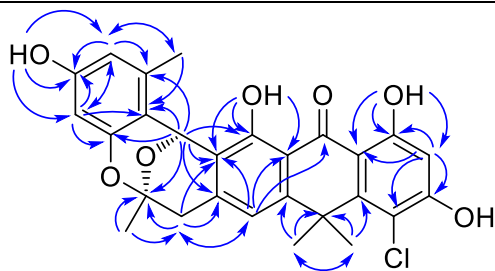

HMBC  
 ROESY

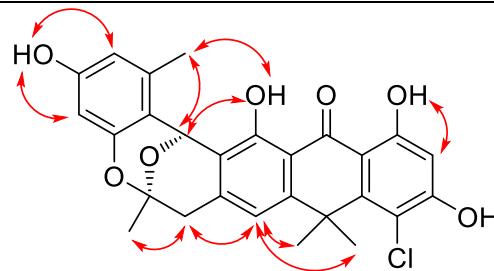

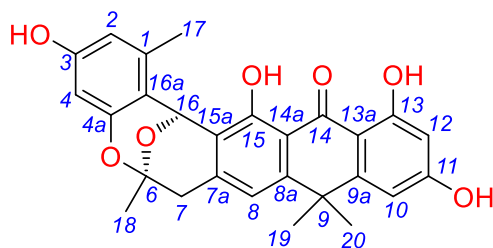

**Table S10.**  $^1\text{H}$  (600 MHz) and  $^{13}\text{C}$  (150 MHz) NMR data for (-)-ABX-A (**10**) in  $\text{DMSO-}d_6$

| Pos.  | $\delta_{\text{H}}$ , mult ( $J$ in Hz) | $\delta_{\text{C}}$ | $^1\text{H-}^{13}\text{C}$ HMBC | ROESY        |
|-------|-----------------------------------------|---------------------|---------------------------------|--------------|
| 1     |                                         | 135.6               |                                 |              |
| 2     | 6.15, d (2.4)                           | 110.0               | 1, 3, 4, 16a, 17                | 3-OH         |
| 3     |                                         | 157.0               |                                 |              |
| 3-OH  | 9.24, s                                 |                     | 2, 3, 4                         | 2, 4         |
| 4     | 6.04, d (2.4)                           | 100.6               | 2, 3, 4a, 16a                   | 3-OH         |
| 4a    |                                         | 151.9               |                                 |              |
| 6     |                                         | 97.6                |                                 |              |
| 7     | 3.05, d (18.7)<br>3.30, d (18.7)        | 39.9                |                                 | 8            |
| 7a    |                                         | 141.7               |                                 |              |
| 8     | 7.14, s                                 | 117.7               | 7, 14, 14a, 15a                 | 7, 19, 20    |
| 8a    |                                         | 150.1               |                                 |              |
| 9     |                                         | 38.3                |                                 |              |
| 9a    |                                         | 154.7               |                                 |              |
| 10    | 6.66, d (2.2)                           | 106.7               | 9, 11, 12, 13a, 14              | 11-OH, 9, 20 |
| 11    |                                         | 165.7               |                                 |              |
| 11-OH | 10.91, s                                |                     | 10, 11, 12                      | 10, 12       |
| 12    | 6.24, d (2.2)                           | 100.9               | 10, 11, 13a                     | 11-OH        |
| 13    |                                         | 164.8               |                                 |              |
| 13-OH | 12.65, s                                |                     | 12, 13, 13a                     |              |
| 13a   |                                         | 106.5               |                                 |              |
| 14    |                                         | 190.0               |                                 |              |
| 14a   |                                         | 110.8               |                                 |              |
| 15    |                                         | 156.8               |                                 |              |
| 15-OH | 13.36, s                                |                     | 14a, 15, 15a                    | 17           |
| 15a   |                                         | 123.0               |                                 |              |
| 16    | 6.14, s                                 | 64.4                | 1, 4a, 6, 7a, 15, 15a, 16a      | 17           |
| 16a   |                                         | 113.0               |                                 |              |
| 17    | 2.33, s                                 | 18.8                | 1, 2, 16a                       | 15-OH, 16    |
| 18    | 1.60, s                                 | 27.3                | 6, 7                            |              |
| 19    | 1.59, s                                 | 33.3                | 8a, 9, 9a, 20                   | 8, 10        |
| 20    | 1.52, s                                 | 33.5                | 8a, 9, 9a, 19                   | 8, 10        |



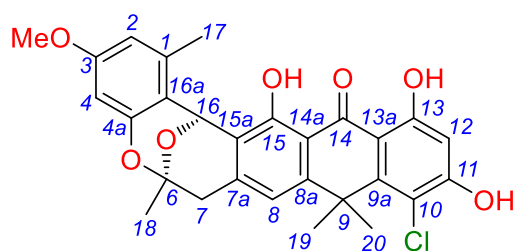

**Table S11.**  $^1\text{H}$  (600 MHz) and  $^{13}\text{C}$  (150 MHz) NMR data for (-)-ABX-B (**11**) in  $\text{DMSO-}d_6$

| Pos.  | $\delta_{\text{H}}$ , mult ( $J$ in Hz) | $\delta_{\text{C}}$ | $^1\text{H-}^{13}\text{C}$ HMBC | ROESY        |
|-------|-----------------------------------------|---------------------|---------------------------------|--------------|
| 1     |                                         | 135.8               |                                 |              |
| 2     | 6.31, d (2.5)                           | 108.8               | 3, 4, 16a, 17                   | 3-OMe, 17    |
| 3     |                                         | 158.9               |                                 |              |
| 3-OMe | 3.64, s                                 | 54.9                | 3                               | 2, 4         |
| 4     | 6.23, d (2.5)                           | 99.1                | 2, 3, 4a, 16a                   | 3-OMe        |
| 4a    |                                         | 152.0               |                                 |              |
| 6     |                                         | 97.9                |                                 |              |
| 7     | 3.09, d (18.4)<br>3.34, d (18.4)        | 39.9                | 6, 7a, 8, 15a                   | 8            |
| 7a    |                                         | 142.2               |                                 |              |
| 8     | 7.13, s                                 | 118.2               | 7, 14, 14a, 15a                 | 7, 19, 20    |
| 8a    |                                         | 148.6               |                                 |              |
| 9     |                                         | 39.4                |                                 |              |
| 9a    |                                         | 152.5               |                                 |              |
| 10    |                                         | 111.8               |                                 |              |
| 11    |                                         | 161.9               |                                 |              |
| 11-OH | 11.75, br s                             |                     |                                 |              |
| 12    | 6.54, s                                 | 102.3               | 10, 11, 13, 13a                 |              |
| 13    |                                         | 163.7               |                                 |              |
| 13-OH | 13.27, s                                |                     | 12, 13, 13a                     |              |
| 13a   |                                         | 107.5               |                                 |              |
| 14    |                                         | 190.3               |                                 |              |
| 14a   |                                         | 109.6               |                                 |              |
| 15    |                                         | 156.2               |                                 |              |
| 15-OH | 13.19, s                                |                     | 14a, 15, 15a                    | 17           |
| 15a   |                                         | 122.2               |                                 |              |
| 16    | 6.19, s                                 | 64.3                | 1, 4a, 6, 7a, 15, 15a, 16a      | 17           |
| 16a   |                                         | 114.5               |                                 |              |
| 17    | 2.40, s                                 | 18.9                | 1, 2, 16a                       | 2, 15-OH, 16 |
| 18    | 1.62, s                                 | 27.3                | 6, 7,                           |              |
| 19    | 1.90, s                                 | 27.8                | 8a, 9, 9a, 20                   | 8            |
| 20    | 1.83, s                                 | 28.1                | 8a, 9, 9a, 19                   | 8            |

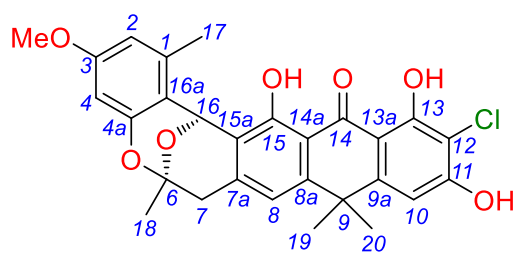

**Table S12.**  $^1\text{H}$  (600 MHz) and  $^{13}\text{C}$  (150 MHz) NMR data for (-)-ABX-C (**12**) in  $\text{DMSO-}d_6$

| Pos.  | $\delta_{\text{H}}$ , mult ( $J$ in Hz) | $\delta_{\text{C}}$ | $^1\text{H-}^{13}\text{C}$ HMBC | ROESY         |
|-------|-----------------------------------------|---------------------|---------------------------------|---------------|
| 1     |                                         | 135.8               |                                 |               |
| 2     | 6.32, d (2.3)                           | 108.8               | 3, 4, 16a, 17                   | 3-OMe, 17     |
| 3     |                                         | 158.9               |                                 |               |
| 3-OMe | 3.64, s                                 | 54.9                | 3                               | 2, 4          |
| 4     | 6.23, d (2.3)                           | 99.1                | 2, 3, 4a, 16a                   | 3-OMe         |
| 4a    |                                         | 152.0               |                                 |               |
| 6     |                                         | 97.9                |                                 |               |
| 7     | 3.09, d (18.4)<br>3.34, d (18.4)        | 39.9                | 6, 7a, 8, 15a                   | 8             |
| 7a    |                                         | 142.2               |                                 |               |
| 8     | 7.17, s                                 | 117.8               | 7, 14, 14a, 15a                 | 7, 19, 20     |
| 8a    |                                         | 150.0               |                                 |               |
| 9     |                                         | 38.2                |                                 |               |
| 9a    |                                         | 151.8               |                                 |               |
| 10    | 6.84, s                                 | 106.2               | 9, 11, 12, 13a, 14              | 11-OH, 19, 20 |
| 11    |                                         | 160.9               |                                 |               |
| 11-OH | 11.64, br s                             |                     |                                 | 10            |
| 12    |                                         | 105.1               |                                 |               |
| 13    |                                         | 159.8               |                                 |               |
| 13-OH | 13.31, s                                |                     | 12, 13, 13a                     |               |
| 13a   |                                         | 107.0               |                                 |               |
| 14    |                                         | 190.0               |                                 |               |
| 14a   |                                         | 110.8               |                                 |               |
| 15    |                                         | 156.9               |                                 |               |
| 15-OH | 13.16, s                                |                     | 14a, 15, 15a                    | 17            |
| 15a   |                                         | 122.8               |                                 |               |
| 16    | 6.20, s                                 | 64.3                | 1, 4a, 6, 7a, 15, 15a, 16a      |               |
| 16a   |                                         | 114.6               |                                 | 17            |
| 17    | 2.41, s                                 | 18.9                | 1, 2, 16a                       | 2, 15-OH, 16a |
| 18    | 1.62, s                                 | 27.2                | 6, 7                            |               |
| 19    | 1.59, s                                 | 33.4                | 8a, 9, 9a, 20                   | 8, 10         |
| 20    | 1.52, s                                 | 33.2                | 8a, 9, 9a, 19                   | 8, 10         |

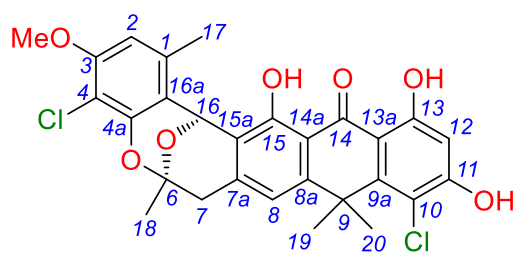

**Table S13.**  $^1\text{H}$  (600 MHz) and  $^{13}\text{C}$  (150 MHz) NMR data for (-)-ABX-D (**13**) in  $\text{CDCl}_3$

| Pos.  | $\delta_{\text{H}}$ , mult ( $J$ in Hz) | $\delta_{\text{C}}$ | $^1\text{H}$ - $^{13}\text{C}$ HMBC | ROESY        |
|-------|-----------------------------------------|---------------------|-------------------------------------|--------------|
| 1     |                                         | 133.1               |                                     |              |
| 2     | 6.38, s                                 | 105.7               | 3, 4, 16a, 17                       | 3-OMe, 17    |
| 3     |                                         | 154.2               |                                     |              |
| 3-OMe | 3.85, s                                 | 55.7                | 3                                   | 2            |
| 4     |                                         | 106.9               |                                     |              |
| 4a    |                                         | 148.0 <sup>a</sup>  |                                     |              |
| 6     |                                         | 99.2                |                                     |              |
| 7     | 3.25, s                                 | 39.9                | 6, 7a, 8, 15a                       | 8, 18        |
| 7a    |                                         | 141.5               |                                     |              |
| 8     | 6.84, s                                 | 117.3               | 7, 14, 14a, 15a                     | 7, 19, 20    |
| 8a    |                                         | 148.0 <sup>a</sup>  |                                     |              |
| 9     |                                         | 39.1                |                                     |              |
| 9a    |                                         | 152.0               |                                     |              |
| 10    |                                         | 110.3               |                                     |              |
| 11    |                                         | 158.4               |                                     |              |
| 11-OH |                                         |                     |                                     |              |
| 12    | 6.65, s                                 | 102.7               | 10, 11, 13, 13a                     |              |
| 13    |                                         | 164.4               |                                     |              |
| 13-OH | 13.41, s                                |                     | 12, 13, 13a                         |              |
| 13a   |                                         | 108.9               |                                     |              |
| 14    |                                         | 190.7               |                                     |              |
| 14a   |                                         | 109.9               |                                     |              |
| 15    |                                         | 157.3               |                                     |              |
| 15-OH | 13.22, s                                |                     | 14a, 15, 15a                        | 17           |
| 15a   |                                         | 121.3               |                                     |              |
| 16    | 6.31, s                                 | 65.2                | 1, 4a, 6, 7a, 15, 15a, 16a          | 17           |
| 16a   |                                         | 116.9               |                                     |              |
| 17    | 2.57, s                                 | 18.8                | 1, 2, 16a                           | 15-OH, 2, 16 |
| 18    | 1.78, s                                 | 26.9                | 6, 7                                | 7            |
| 19    | 1.94, s                                 | 28.3                | 8a, 9, 9a, 20                       | 8            |
| 20    | 1.86, s                                 | 28.5                | 8a, 9a, 9, 19                       | 8            |

<sup>a</sup> resonances overlapping

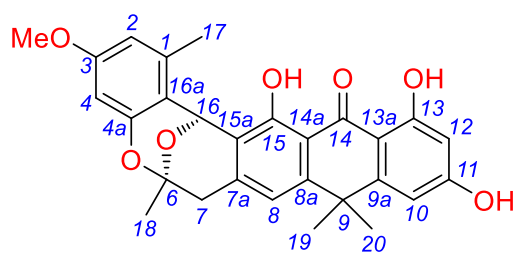

**Table S14.**  $^1\text{H}$  (600 MHz) and  $^{13}\text{C}$  (150 MHz) NMR data for (-)-ABX-E (**14**) in  $\text{DMSO-}d_6$

| Pos.  | $\delta_{\text{H}}$ , mult ( $J$ in Hz) | $\delta_{\text{C}}$ | $^1\text{H-}^{13}\text{C}$ HMBC | ROESY         |
|-------|-----------------------------------------|---------------------|---------------------------------|---------------|
| 1     |                                         | 135.9               |                                 |               |
| 2     | 6.31, d (2.5)                           | 108.8               | 1, 3, 4, 16a, 17                | 3-OMe, 17     |
| 3     |                                         | 159.0               |                                 |               |
| 3-OMe | 3.64, s                                 | 55.0                | 3                               | 2, 4          |
| 4     | 6.23, d (2.5)                           | 99.2                | 2, 3, 4a, 16a                   | 3-OMe         |
| 4a    |                                         | 152.1               |                                 |               |
| 6     |                                         | 98.0                |                                 |               |
| 7     | 3.08, d (18.9)<br>3.32, d (18.9)        | 39.9                | 6, 7a, 8, 15a                   | 8             |
| 7a    |                                         | 141.6               |                                 |               |
| 8     | 7.14, s                                 | 117.7               | 7, 14, 14a, 15a                 | 7, 19, 20     |
| 8a    |                                         | 150.2               |                                 |               |
| 9     |                                         | 38.4                |                                 |               |
| 9a    |                                         | 154.7               |                                 |               |
| 10    | 6.66, d (2.1)                           | 106.8               | 9, 11, 12, 13a, 14              | 11-OH, 19, 20 |
| 11    |                                         | 165.7               |                                 |               |
| 11-OH | 10.93, s                                |                     | 10, 11, 12                      | 10, 12        |
| 12    | 6.24, d (2.1)                           | 101.0               | 10, 11, 13a                     | 11-OH         |
| 13    |                                         | 164.9               |                                 |               |
| 13-OH | 12.64, s                                |                     | 12, 13, 13a                     |               |
| 13a   |                                         | 106.5               |                                 |               |
| 14    |                                         | 190.0               |                                 |               |
| 14a   |                                         | 110.9               |                                 |               |
| 15    |                                         | 156.9               |                                 |               |
| 15-OH | 13.38, s                                |                     | 15, 14a, 15a                    |               |
| 15a   |                                         | 122.7               |                                 |               |
| 16    | 6.19, s                                 | 64.4                | 1, 4a, 6, 7a, 15, 15a, 16a      | 17            |
| 16a   |                                         | 114.7               |                                 |               |
| 17    | 2.40, s                                 | 18.9                | 1, 2, 16a                       | 2, 16         |
| 18    | 1.62, s                                 | 27.3                | 6, 7                            |               |
| 19    | 1.59, s                                 | 33.3                | 8a, 9, 9a, 20                   | 8, 10         |
| 20    | 1.52, s                                 | 33.5                | 8a, 9, 9a, 19                   | 8, 10         |

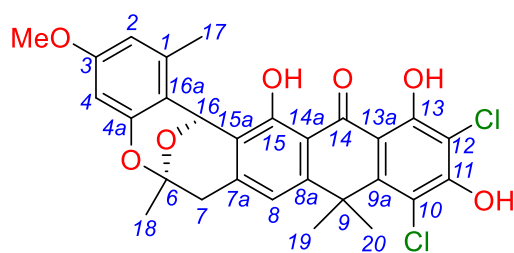

**Table S15.**  $^1\text{H}$  (600 MHz) and  $^{13}\text{C}$  (150 MHz) NMR data for (-)-BABX (**15**) in  $\text{CDCl}_3$

| Pos.  | $\delta_{\text{H}}$ , mult ( <i>J</i> in Hz) | $\delta_{\text{C}}$ | $^1\text{H}$ - $^{13}\text{C}$ HMBC | ROESY        |
|-------|----------------------------------------------|---------------------|-------------------------------------|--------------|
| 1     |                                              | 136.1               |                                     |              |
| 2     | 6.35, d (2.5)                                | 108.8               | 3, 4, 16a, 17                       | 3-OMe, 17    |
| 3     |                                              | 159.0               |                                     |              |
| 3-OMe | 3.73, s                                      | 54.7                | 3                                   | 2            |
| 4     | 6.28, d (2.5)                                | 99.0                | 2, 3, 4a, 16a                       |              |
| 4a    |                                              | 151.9               |                                     |              |
| 6     |                                              | 97.6                |                                     |              |
| 7     | 3.18, d (17.8)<br>3.25, d (17.8)             | 40.2                | 6, 7a, 8, 15a                       | 8, 18        |
| 7a    |                                              | 142.6               |                                     |              |
| 8     | 6.85, s                                      | 117.4               | 7, 14, 14a, 15a                     | 7, 19, 20    |
| 8a    |                                              | 146.2               |                                     |              |
| 9     |                                              | 39.2                |                                     |              |
| 9a    |                                              | 152.1               |                                     |              |
| 10    |                                              | 110.7               |                                     |              |
| 11    |                                              | 154.6               |                                     |              |
| 11-OH |                                              |                     |                                     |              |
| 12    |                                              | 108.7               |                                     |              |
| 13    |                                              | 159.4               |                                     |              |
| 13-OH | 14.24, s                                     |                     | 12, 13, 13a                         |              |
| 13a   |                                              | 107.3               |                                     |              |
| 14    |                                              | 190.7               |                                     |              |
| 14a   |                                              | 109.7               |                                     |              |
| 15    |                                              | 157.3               |                                     |              |
| 15-OH | 12.99, s                                     |                     | 14a, 15, 15a                        | 17           |
| 15a   |                                              | 122.9               |                                     |              |
| 16    | 6.33, s                                      | 64.8                | 1, 4a, 6, 7a, 15, 15a, 16a          | 17           |
| 16a   |                                              | 114.4               |                                     |              |
| 17    | 2.51, s                                      | 18.9                | 1, 2, 16a                           | 2, 15-OH, 16 |
| 18    | 1.74, s                                      | 27.1                | 6, 7                                | 7            |
| 19    | 1.95, s                                      | 28.3                | 8a, 9, 9a, 20                       | 8            |
| 20    | 1.87, s                                      | 28.5                | 8a, 9, 9a, 19                       | 8            |

**Table S16.** XYZ coordinates for geometry-optimised (DFT-D3(BJ)/PBE0/def2-SV(P)-COSMO(MeCN)) ground-state structure of (6*R*,16*R*)-ABX-G

|    |           |           |           |    |           |           |           |
|----|-----------|-----------|-----------|----|-----------|-----------|-----------|
| 62 |           |           |           | O  | 1.128217  | 1.011683  | 4.971508  |
|    |           |           |           | C  | 3.498385  | 1.165733  | 5.365655  |
| C  | -0.891064 | 0.336325  | -2.497511 | H  | 3.400187  | 0.491837  | 6.241882  |
| C  | -0.541856 | 1.728376  | -2.564059 | H  | 3.368744  | 2.216059  | 5.700234  |
| C  | -0.934388 | 2.421388  | -3.722658 | H  | 4.512154  | 1.041112  | 4.930359  |
| C  | -1.647123 | 1.792219  | -4.795506 | C  | -0.438298 | -3.560628 | 3.665033  |
| C  | -1.975917 | 0.438760  | -4.714049 | H  | -0.633887 | -4.418235 | 4.344125  |
| H  | -2.521867 | -0.047093 | -5.534499 | H  | 0.579440  | -3.717377 | 3.230884  |
| C  | -1.608009 | -0.302125 | -3.581632 | O  | -1.446219 | -3.617292 | 2.667637  |
| C  | -0.541557 | -0.472895 | -1.342992 | H  | -1.199613 | -2.917906 | 2.016893  |
| C  | 0.163207  | 0.105867  | -0.210418 | O  | -2.554357 | -0.856170 | 7.243763  |
| C  | 0.557969  | 1.469025  | -0.232137 | C  | -3.491621 | -1.894060 | 7.470451  |
| C  | 0.229875  | 2.407261  | -1.407833 | H  | -4.155718 | -1.536645 | 8.283596  |
| C  | 0.467980  | -0.717456 | 0.927831  | H  | -2.994714 | -2.839002 | 7.796600  |
| C  | 1.173849  | -0.193739 | 2.034905  | H  | -4.106705 | -2.103598 | 6.563005  |
| C  | 1.590237  | 1.149297  | 1.980509  | O  | 0.105162  | -2.015481 | 0.946424  |
| C  | 1.270852  | 1.959718  | 0.868829  | H  | -0.325549 | -2.191888 | 0.018693  |
| H  | 1.609753  | 3.007131  | 0.890761  | O  | -0.854896 | -1.723051 | -1.316091 |
| C  | 1.504090  | -1.070490 | 3.244145  | O  | -1.942046 | -1.592048 | -3.547583 |
| H  | 1.828152  | -2.068374 | 2.891577  | H  | -1.589248 | -1.951973 | -2.654919 |
| O  | 2.639646  | -0.528347 | 3.957584  | O  | -2.015626 | 2.471911  | -5.897063 |
| C  | 2.431470  | 0.808552  | 4.336166  | H  | -1.704566 | 3.408802  | -5.789931 |
| C  | 2.440248  | 1.715616  | 3.097010  | C  | 1.591327  | 2.936405  | -1.956845 |
| H  | 2.089442  | 2.731721  | 3.378611  | H  | 2.225157  | 2.087178  | -2.291369 |
| H  | 3.491181  | 1.817749  | 2.739935  | H  | 2.144015  | 3.483367  | -1.164421 |
| C  | 0.374145  | -1.177178 | 4.255985  | H  | 1.453100  | 3.627676  | -2.810631 |
| C  | -0.483800 | -2.274314 | 4.482617  | C  | -0.651021 | 3.554757  | -0.821829 |
| C  | -1.488148 | -2.180967 | 5.473188  | H  | -0.101734 | 4.093190  | -0.021397 |
| H  | -2.166173 | -3.036672 | 5.605111  | H  | -1.577896 | 3.134681  | -0.375881 |
| C  | -1.613143 | -1.026580 | 6.269858  | H  | -0.937296 | 4.293809  | -1.595117 |
| C  | -0.705995 | 0.040592  | 6.104705  | C1 | -0.618265 | 4.146175  | -4.038325 |
| H  | -0.763974 | 0.926172  | 6.753685  |    |           |           |           |
| C  | 0.272303  | -0.046562 | 5.108938  |    |           |           |           |

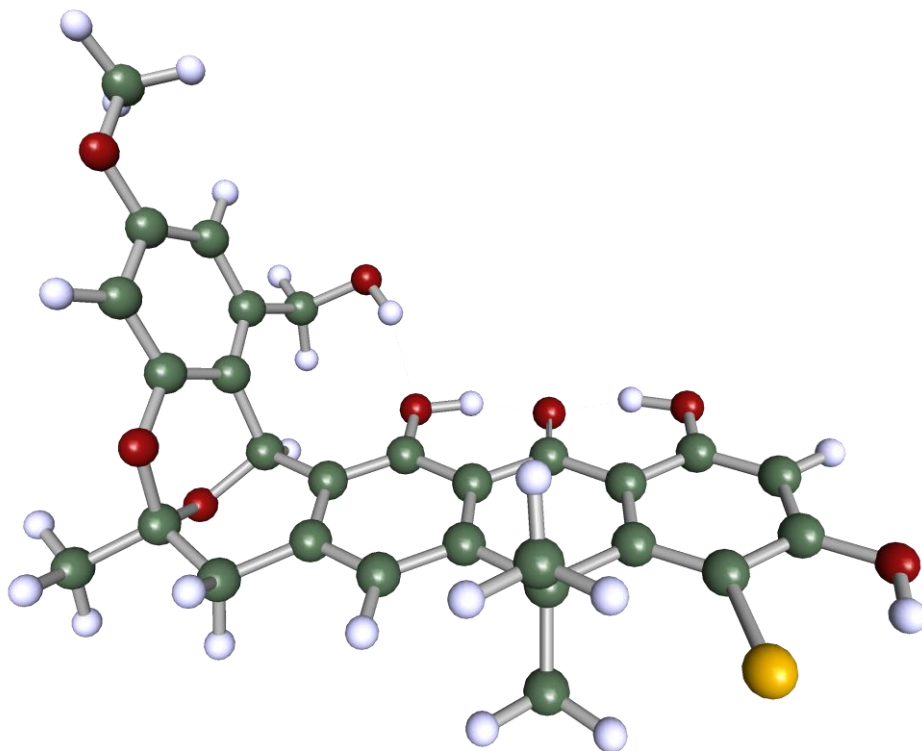

**Table S17.** XYZ coordinates for geometry-optimised (DFT-D3(BJ)/PBE0/def2-SV(P)-COSMO(MeCN)) ground-state structure of (6*S*,16*S*)-ABX-G

|    |          |          |          |    |          |          |          |
|----|----------|----------|----------|----|----------|----------|----------|
| 62 |          |          |          | C  | 2.26464  | 4.60062  | 3.80209  |
|    |          |          |          | H  | 3.24776  | 4.96916  | 3.50771  |
|    |          |          |          | H  | 2.23174  | 4.49170  | 4.88665  |
| C  | -0.31205 | -1.24697 | -2.42036 | H  | 1.50758  | 5.31981  | 3.48773  |
| C  | 0.54961  | -0.42634 | -3.18968 | C  | -0.24104 | -1.14485 | 4.76668  |
| C  | 0.67519  | -0.72731 | -4.54092 | H  | -1.01242 | -0.41404 | 4.51076  |
| C  | -0.02020 | -1.80412 | -5.13024 | H  | -0.45048 | -1.50386 | 5.77631  |
| C  | -0.85599 | -2.59582 | -4.37271 | O  | -0.32998 | -2.27642 | 3.91633  |
| H  | -1.38763 | -3.41981 | -4.83050 | H  | -0.33332 | -1.92397 | 3.01572  |
| C  | -1.01108 | -2.32748 | -3.02801 | O  | 4.42705  | -1.21930 | 6.22850  |
| C  | -0.50618 | -1.01650 | -1.01020 | C  | 4.17892  | -2.45478 | 6.87370  |
| C  | 0.19861  | 0.04621  | -0.33576 | H  | 5.12499  | -2.75977 | 7.31613  |
| C  | 1.03936  | 0.89942  | -1.05777 | H  | 3.84904  | -3.21412 | 6.15903  |
| C  | 1.29509  | 0.74005  | -2.54692 | H  | 3.42796  | -2.34635 | 7.66165  |
| C  | 0.02295  | 0.23619  | 1.05625  | O  | -0.79572 | -0.56108 | 1.75391  |
| C  | 0.67446  | 1.26722  | 1.72601  | H  | -1.20783 | -1.17612 | 1.07735  |
| C  | 1.47375  | 2.12836  | 0.98513  | O  | -1.29987 | -1.74817 | -0.35181 |
| C  | 1.65732  | 1.93379  | -0.38009 | O  | -1.83115 | -3.11689 | -2.34111 |
| H  | 2.29801  | 2.62998  | -0.90646 | H  | -1.82755 | -2.77687 | -1.40579 |
| C  | 0.49144  | 1.47369  | 3.21336  | O  | 0.09654  | -2.09814 | -6.42528 |
| H  | -0.54868 | 1.28984  | 3.47792  | H  | 0.70786  | -1.47393 | -6.84787 |
| O  | 0.73955  | 2.83822  | 3.55752  | C  | 2.81408  | 0.51247  | -2.69307 |
| C  | 2.00561  | 3.26565  | 3.15337  | H  | 3.10393  | -0.40129 | -2.17005 |
| C  | 2.09441  | 3.32000  | 1.64168  | H  | 3.35891  | 1.34517  | -2.24935 |
| H  | 1.57268  | 4.21858  | 1.29696  | H  | 3.12007  | 0.42831  | -3.73163 |
| H  | 3.13929  | 3.42630  | 1.34328  | C  | 0.83301  | 2.05412  | -3.20981 |
| C  | 1.42671  | 0.64842  | 4.05614  | H  | -0.23253 | 2.20649  | -3.02632 |
| C  | 1.12893  | -0.51839 | 4.75400  | H  | 1.00223  | 2.05472  | -4.28278 |
| C  | 2.12172  | -1.16823 | 5.48871  | H  | 1.37573  | 2.89835  | -2.78563 |
| H  | 1.86289  | -2.07606 | 6.01753  | Cl | 1.67024  | 0.14411  | -5.67266 |
| C  | 3.40740  | -0.64774 | 5.54992  |    |          |          |          |
| C  | 3.69876  | 0.55594  | 4.91572  |    |          |          |          |
| H  | 4.68323  | 0.99938  | 5.00319  |    |          |          |          |
| C  | 2.71065  | 1.19074  | 4.18781  |    |          |          |          |
| O  | 3.04079  | 2.36873  | 3.61204  |    |          |          |          |

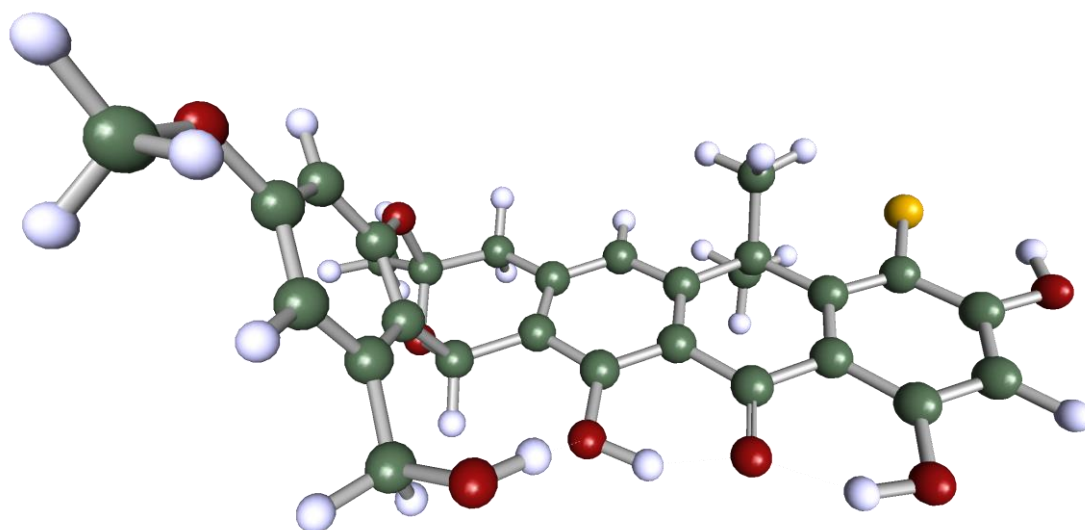

**Table S18.** XYZ coordinates for geometry-optimised (DFT-D3(BJ)/PBE0/def2-SV(P)-COSMO(MeCN)) ground-state structure of (6*R*,16*R*)-ABX-K

58

|   |           |           |           |    |           |           |           |
|---|-----------|-----------|-----------|----|-----------|-----------|-----------|
| C | 2.726134  | 0.138723  | -0.943023 | C  | -3.113180 | 1.116966  | 5.046176  |
| C | 2.583911  | -1.274343 | -1.025682 | H  | -3.406566 | 0.294686  | 5.704564  |
| C | 3.684134  | -1.999445 | -1.489612 | C  | -3.188923 | 0.959007  | 3.662105  |
| C | 4.898451  | -1.367447 | -1.865259 | O  | -3.622610 | -0.228386 | 3.184205  |
| C | 5.020258  | 0.010872  | -1.778857 | C  | -5.670522 | -0.739642 | 2.068759  |
| H | 5.953819  | 0.495808  | -2.068258 | H  | -6.176203 | -0.818592 | 1.093175  |
| C | 3.951051  | 0.773145  | -1.323603 | H  | -6.198203 | 0.003130  | 2.688927  |
| C | 1.644497  | 0.980927  | -0.472920 | H  | -5.699795 | -1.719234 | 2.571116  |
| C | 0.384307  | 0.396203  | -0.066993 | C  | -2.179259 | 4.411712  | 2.402791  |
| C | 0.190877  | -0.996311 | -0.138206 | H  | -1.972324 | 5.314281  | 2.999317  |
| C | 1.273093  | -1.956227 | -0.621589 | H  | -3.050421 | 4.624922  | 1.756966  |
| C | -0.659539 | 1.243272  | 0.404191  | H  | -1.324311 | 4.220198  | 1.736473  |
| C | -1.889062 | 0.702078  | 0.805292  | O  | -2.552663 | 2.567465  | 6.879304  |
| C | -2.072072 | -0.677831 | 0.710016  | H  | -2.804882 | 1.772474  | 7.378532  |
| C | -1.041661 | -1.507229 | 0.249604  | O  | -0.505080 | 2.560815  | 0.465564  |
| H | -1.237628 | -2.580608 | 0.203847  | H  | 0.423275  | 2.760478  | 0.135761  |
| C | -2.991926 | 1.604270  | 1.329404  | O  | 1.798173  | 2.234038  | -0.413925 |
| H | -3.071527 | 2.495226  | 0.691704  | O  | 4.114454  | 2.086417  | -1.259010 |
| O | -4.252405 | 0.941190  | 1.246502  | H  | 3.250872  | 2.468917  | -0.913521 |
| C | -4.237821 | -0.300990 | 1.877157  | O  | 5.946638  | -2.057931 | -2.306485 |
| C | -3.400245 | -1.276942 | 1.070324  | H  | 5.732871  | -3.013370 | -2.321206 |
| H | -3.263549 | -2.211344 | 1.637852  | C  | 0.690810  | -2.684098 | -1.855134 |
| H | -3.950164 | -1.532395 | 0.146814  | H  | 0.425330  | -1.948780 | -2.633307 |
| C | -2.819944 | 1.981801  | 2.779295  | H  | -0.220895 | -3.236208 | -1.577989 |
| C | -2.449171 | 3.234371  | 3.296841  | H  | 1.401720  | -3.403602 | -2.283526 |
| C | -2.361269 | 3.391691  | 4.683244  | C  | 1.553829  | -2.918969 | 0.555318  |
| H | -2.062941 | 4.352426  | 5.111382  | H  | 0.638068  | -3.467900 | 0.825801  |
| C | -2.670793 | 2.339423  | 5.553431  | H  | 1.885207  | -2.345738 | 1.437560  |
|   |           |           |           | H  | 2.328083  | -3.658164 | 0.308852  |
|   |           |           |           | C1 | 3.735691  | -3.741208 | -1.675062 |

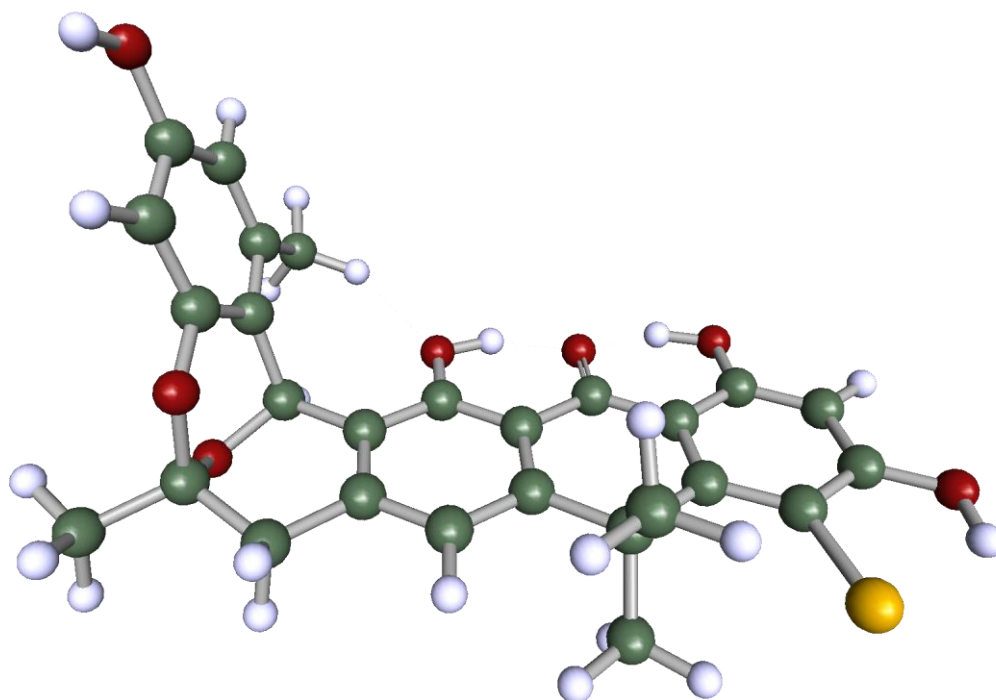



**Table S19.** XYZ coordinates for geometry-optimised (DFT-D3(BJ)/PBE0/def2-SV(P)-COSMO(MeCN)) ground-state structure of (6*S*,16*S*)-ABX-K

|    |   |           |           |           |           |           |           |           |
|----|---|-----------|-----------|-----------|-----------|-----------|-----------|-----------|
| 58 |   |           |           | H         | -6.471223 | 0.366164  | -0.358578 |           |
|    |   |           |           | C         | -4.689308 | 0.468526  | 0.855705  |           |
|    |   |           |           | O         | -4.518163 | -0.870466 | 0.792248  |           |
|    | C | 2.489198  | 1.058014  | -1.378293 | C         | -4.755844 | -2.503323 | 2.517045  |
|    | C | 2.507188  | -0.236831 | -1.967205 | H         | -4.240689 | -3.058332 | 3.317215  |
|    | C | 3.531927  | -0.508927 | -2.876757 | H         | -5.160381 | -3.218778 | 1.784003  |
|    | C | 4.519392  | 0.455106  | -3.209285 | H         | -5.584661 | -1.924500 | 2.956129  |
|    | C | 4.487713  | 1.712228  | -2.625619 | C         | -3.162161 | 3.525309  | 2.544299  |
|    | H | 5.247397  | 2.452412  | -2.881457 | H         | -2.124206 | 3.552152  | 2.178909  |
|    | C | 3.486802  | 2.027306  | -1.714354 | H         | -3.128535 | 3.151847  | 3.583885  |
|    | C | 1.466772  | 1.440570  | -0.425190 | H         | -3.559686 | 4.552338  | 2.567032  |
|    | C | 0.426614  | 0.505901  | -0.052219 | O         | -6.998921 | 3.011149  | -0.386699 |
|    | C | 0.406619  | -0.791069 | -0.599034 | H         | -7.533759 | 2.356585  | -0.866654 |
|    | C | 1.442781  | -1.277854 | -1.606842 | O         | -0.568588 | 2.122922  | 1.415818  |
|    | C | -0.576259 | 0.910002  | 0.875140  | H         | 0.228382  | 2.604857  | 1.037606  |
|    | C | -1.596045 | 0.024617  | 1.251477  | O         | 1.478342  | 2.596808  | 0.085123  |
|    | C | -1.589391 | -1.264408 | 0.717624  | O         | 3.497942  | 3.240887  | -1.182677 |
|    | C | -0.603338 | -1.656273 | -0.196591 | H         | 2.713048  | 3.289458  | -0.555762 |
|    | H | -0.652321 | -2.674151 | -0.589183 | O         | 5.495046  | 0.196330  | -4.076072 |
|    | C | -2.679360 | 0.466079  | 2.219155  | H         | 5.405314  | -0.718247 | -4.414107 |
|    | H | -2.224808 | 1.021529  | 3.050777  | C         | 0.658379  | -1.653084 | -2.885421 |
|    | O | -3.315018 | -0.671357 | 2.800087  | H         | -0.074366 | -2.445134 | -2.664421 |
|    | C | -3.793079 | -1.558082 | 1.837765  | H         | 1.318848  | -2.019311 | -3.683031 |
|    | C | -2.628752 | -2.254534 | 1.156123  | H         | 0.110790  | -0.772324 | -3.261204 |
|    | H | -2.178142 | -2.966868 | 1.870315  | C         | 2.139678  | -2.497717 | -0.961216 |
|    | H | -2.993856 | -2.840394 | 0.297409  | H         | 2.610163  | -2.199877 | -0.009023 |
|    | C | -3.779238 | 1.263398  | 1.563985  | H         | 2.913471  | -2.924228 | -1.613832 |
|    | C | -4.021177 | 2.642357  | 1.683643  | H         | 1.404458  | -3.289734 | -0.749031 |
|    | C | -5.110507 | 3.197173  | 1.005323  | Cl        | 3.752060  | -2.029722 | -3.719122 |
|    | H | -5.313544 | 4.269388  | 1.071849  |           |           |           |           |
|    | C | -5.975271 | 2.399031  | 0.246810  |           |           |           |           |
|    | C | -5.783725 | 1.018086  | 0.187379  |           |           |           |           |

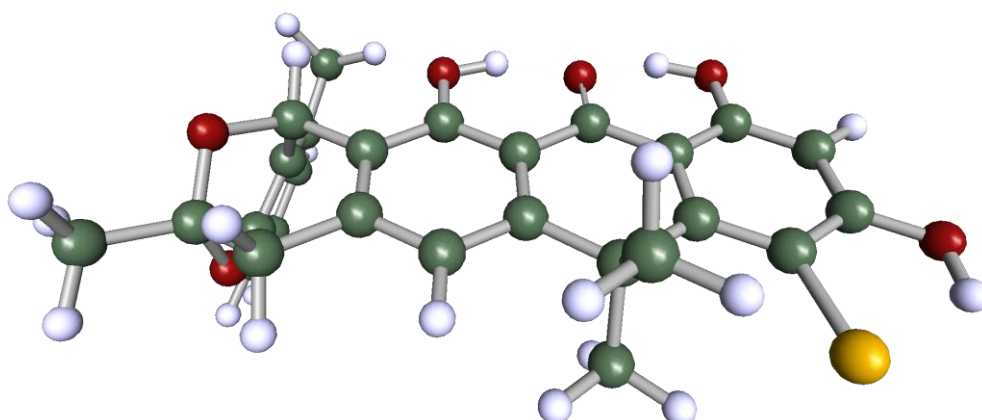

**Table S20.** Genes encoding the svetamycin (*sve*) biosynthetic gene cluster and their closest known homologues.

| <i>Gene</i>  | Start | End   | Length (nt) | Strand  | Known Homologue                           | BLASTP hit                                                                                                          | Coverage | Identity | Putative Role                                 |
|--------------|-------|-------|-------------|---------|-------------------------------------------|---------------------------------------------------------------------------------------------------------------------|----------|----------|-----------------------------------------------|
| <i>orf-6</i> | 4010  | 4621  | 612         | forward | <i>tpdN</i>                               | dihydrofolate reductase family protein [ <i>Streptomyces</i> sp. BA2]                                               | 99%      | 86.70%   | -                                             |
| <i>orf-5</i> | 4625  | 6043  | 1419        | reverse | <i>SCO2445, xanB3</i>                     | acetyl-CoA carboxylase [ <i>Streptomyces</i> sp. BA2]                                                               | 95%      | 84.43%   | -                                             |
| <i>orf-4</i> | 6036  | 7499  | 1464        | reverse | <i>SCO2444</i>                            | AMP-binding protein [ <i>Streptomyces</i> sp. BA2]                                                                  | 95%      | 88.79%   | -                                             |
| <i>orf-3</i> | 7590  | 8837  | 1248        | reverse | <i>SCO2443</i>                            | TPA: hypothetical protein [ <i>Streptomyces</i> sp.]                                                                | 99%      | 85.89%   | -                                             |
| <i>orf-2</i> | 9066  | 9806  | 741         | forward | <i>SCO2442</i>                            | FadR family transcriptional regulator [ <i>Streptomyces niveus</i> ]                                                | 95%      | 86.38%   | -                                             |
| <i>orf-1</i> | 9931  | 11052 | 1122        | forward | -                                         | YncE family protein [ <i>Streptomyces</i> sp. CB02058]                                                              | 97%      | 71.15%   | -                                             |
| <i>sveR1</i> | 11185 | 12054 | 870         | forward | -                                         | metalloregulator ArsR/SmtB family transcription factor [ <i>Actinophytocola</i> sp.]                                | 98%      | 84.56%   | Regulatory                                    |
| <i>sveB</i>  | 12051 | 12662 | 612         | forward | -                                         | dihydrofolate reductase family protein [ <i>Streptomyces scabiei</i> ]                                              | 99%      | 85.22%   | Unknown                                       |
| <i>sveT1</i> | 12687 | 13994 | 1308        | reverse | <i>dacR3, hex15</i>                       | MULTISPECIES: cation:proton antiporter [unclassified <i>Streptomyces</i> ]                                          | 99%      | 88.74%   | Transporter                                   |
| <i>sveC</i>  | 13954 | 14715 | 762         | reverse | -                                         | alpha/beta fold hydrolase [ <i>Streptomyces</i> sp. DvalAA-43]                                                      | 99%      | 81.82%   | Unknown                                       |
| <i>sveD</i>  | 14744 | 15703 | 960         | reverse | <i>barB1, ktzD, kthP</i>                  | chlorinating enzyme [ <i>Streptomyces griseus</i> ]                                                                 | 97%      | 89.46%   | Chlorination                                  |
| <i>sveE</i>  | 15717 | 16004 | 288         | reverse | -                                         | MULTISPECIES: acyl carrier protein [unclassified <i>Streptomyces</i> ]                                              | 98%      | 85.26%   | Accessory Protein                             |
| <i>sveF</i>  | 16465 | 16683 | 219         | forward | <i>cdeL, ktzJ</i>                         | MULTISPECIES: MbtH family protein [unclassified <i>Streptomyces</i> ]                                               | 98%      | 94.44%   | Accessory Protein                             |
| <i>sveG1</i> | 16725 | 17678 | 954         | forward | <i>qcn7, napB</i>                         | thiamine pyrophosphate-dependent dehydrogenase E1 component subunit alpha [ <i>Streptomyces griseus</i> ]           | 99%      | 85.49%   | Glycolic acid biosynthesis and incorporation  |
| <i>sveG2</i> | 17675 | 17905 | 231         | forward | <i>qcn8, napC</i>                         | acyl carrier protein [ <i>Streptomyces griseus</i> ]                                                                | 98%      | 84.21%   | Glycolic acid biosynthesis and incorporation  |
| <i>sveG3</i> | 17902 | 20001 | 2100        | forward | <i>qcn9, napD</i>                         | MULTISPECIES: 2-oxo acid dehydrogenase subunit E2 [unclassified <i>Streptomyces</i> ]                               | 99%      | 83.33%   | Glycolic acid biosynthesis and incorporation  |
| <i>sveG4</i> | 20001 | 20996 | 996         | forward | <i>qcn10, napE</i>                        | 3-oxoacyl-[acyl-carrier-protein] synthase-3 [ <i>Streptomyces</i> sp. DvalAA-43]                                    | 99%      | 87.88%   | Glycolic acid biosynthesis and incorporation  |
| <i>sveH</i>  | 21020 | 22327 | 1308        | reverse | -                                         | tetratricopeptide repeat protein [ <i>Streptomyces griseus</i> ]                                                    | 99%      | 80.73%   | Accessory Protein                             |
| <i>sveR2</i> | 23114 | 23713 | 600         | forward | <i>hmtD, ktz(orf10), plyB</i>             | MULTISPECIES: LmbU family transcriptional regulator [unclassified <i>Streptomyces</i> ]                             | 99%      | 87.94%   | Regulation                                    |
| <i>sveP1</i> | 23877 | 24548 | 672         | reverse | <i>hmtC, ktz(orf4), mfnJ</i>              | MULTISPECIES: FMN-binding negative transcriptional regulator [unclassified <i>Streptomyces</i> ]                    | 95%      | 82.79%   | Piperazic acid biosynthesis and incorporation |
| <i>sveP2</i> | 24839 | 26185 | 1347        | forward | <i>hmtM, ktzI, mfnI</i>                   | MULTISPECIES: lysine N(6)-hydroxylase/L-ornithine N(5)-oxygenase family protein [unclassified <i>Streptomyces</i> ] | 99%      | 89.06%   | Piperazic acid biosynthesis and incorporation |
| <i>sveP3</i> | 26283 | 27887 | 1605        | forward | <i>mfnK</i>                               | Plipastatin synthase subunit D [ <i>Streptomyces</i> sp. YIM 121038]                                                | 98%      | 83.71%   | Piperazic acid biosynthesis and incorporation |
| <i>sveP4</i> | 27953 | 28231 | 279         | forward | -                                         | MULTISPECIES: hypothetical protein [unclassified <i>Streptomyces</i> ]                                              | 97%      | 91.21%   | Piperazic acid biosynthesis and incorporation |
| <i>sveI</i>  | 28228 | 28998 | 771         | forward | <i>ktzF, plyY</i>                         | thioesterase [ <i>Streptomyces</i> sp. DvalAA-43]                                                                   | 99%      | 77.34%   | Accessory Protein                             |
| <i>sveJ</i>  | 29011 | 30987 | 1977        | forward | <i>ktz(orf7), cysS, cmmK</i>              | cobalamin B12-binding domain-containing protein [ <i>Streptomyces griseus</i> ]                                     | 99%      | 91.03%   | Methylserine biosynthesis                     |
| <i>sveK</i>  | 31057 | 32439 | 1383        | forward | <i>amiS, fmoH, asmD</i>                   | serine hydroxymethyltransferase [ <i>Streptomyces griseus</i> ]                                                     | 98%      | 85.93%   | Serine biosynthesis                           |
| <i>sveA1</i> | 32521 | 38031 | 5511        | reverse | <i>cdeI, cdeJ, hmtL, plyG</i>             | MULTISPECIES: non-ribosomal peptide synthetase [unclassified <i>Streptomyces</i> ]                                  | 99%      | 75.98%   | Non-ribosomal peptide synthesis               |
| <i>sveA2</i> | 38462 | 54790 | 16329       | forward | -                                         | amino acid adenylation domain-containing protein [ <i>Streptomyces tsukubensis</i> ]                                | 99%      | 78.89%   | Non-ribosomal peptide synthesis               |
| <i>sveO1</i> | 54866 | 56074 | 1209        | reverse | <i>mfnN, sceD</i>                         | MULTISPECIES: cytochrome P450 [unclassified <i>Streptomyces</i> ]                                                   | 99%      | 91.50%   | Hydroxylation                                 |
| <i>sveO2</i> | 56147 | 56326 | 180         | reverse | <i>sceC</i>                               | ferredoxin [ <i>Streptomyces griseus</i> ]                                                                          | 93%      | 78.95%   | Hydroxylation                                 |
| <i>sveO3</i> | 56360 | 57568 | 1209        | reverse | <i>sceE</i>                               | MULTISPECIES: cytochrome P450 [unclassified <i>Streptomyces</i> ]                                                   | 99%      | 91.79%   | Hydroxylation                                 |
| <i>sveL</i>  | 57882 | 58658 | 777         | forward | <i>ulm24</i>                              | MULTISPECIES: amidinotransferase [unclassified <i>Streptomyces</i> ]                                                | 99%      | 91.09%   | ornithine biosynthesis                        |
| <i>sveM</i>  | 58715 | 60808 | 2094        | forward | <i>cdeI, hmtL, ktzH, mfnC</i>             | MULTISPECIES: amino acid adenylation domain-containing protein [unclassified <i>Streptomyces</i> ]                  | 99%      | 73.03%   | Unknown                                       |
| <i>sveN</i>  | 60816 | 62228 | 1413        | reverse | <i>dsaJ, ullm16</i>                       | CubicO group peptidase, beta-lactamase class C family [ <i>Streptomyces</i> sp. DvalAA-43]                          | 99%      | 90.64%   | Unknown                                       |
| <i>sveT2</i> | 62373 | 63164 | 792         | reverse | <i>pylK</i>                               | MULTISPECIES: ABC transporter permease [unclassified <i>Streptomyces</i> ]                                          | 99%      | 97.34%   | Transport                                     |
| <i>sveQ</i>  | 63161 | 64237 | 1077        | reverse | <i>cdeD, hmtL, ktzH, mfnC, pylG, pylF</i> | ATP-binding cassette domain-containing protein [ <i>Streptomyces tsukubensis</i> ]                                  | 99%      | 90.50%   | Transport                                     |
| <i>sveR3</i> | 64752 | 67886 | 3135        | reverse | <i>hmt(orf+2) pylL</i>                    | MULTISPECIES: LuxR family transcriptional regulator [unclassified <i>Streptomyces</i> ]                             | 99%      | 90.23%   | Regulation                                    |
| <i>sveS</i>  | 68026 | 68547 | 522         | forward | -                                         | MULTISPECIES: chloramphenicol phosphotransferase CPT [unclassified <i>Streptomyces</i> ]                            | 98%      | 81.40%   | Putative self-resistance                      |
| <i>sveT</i>  | 68584 | 69252 | 669         | forward | -                                         | haloacid dehalogenase type II [ <i>Streptomyces</i> sp. MZ04]                                                       | 99%      | 83.78%   | Putative self-resistance                      |
| <i>sveR4</i> | 69198 | 69881 | 684         | reverse | -                                         | TetR/AcrR family transcriptional regulator [ <i>Nonomuraea solani</i> ]                                             | 89%      | 75.86%   | Regulation                                    |
| <i>orf+1</i> | 69986 | 70930 | 945         | forward | -                                         | chlorophyllase [ <i>Streptomyces aurantiacus</i> ]                                                                  | 99%      | 81.41%   | -                                             |
| <i>orf+2</i> | 71045 | 72382 | 1338        | reverse | -                                         | hypothetical protein [ <i>Streptomyces</i> sp. MZ04]                                                                | 99%      | 85.20%   | -                                             |

**Table S21.** cblaster analysis of the svetamycin (*sve*) BGC showing hits against the MIBiG database.

| Scaffold   | Major Product      | -6 | -5 | -4 | -3 | -2 | -1 | R1 | B | T1 | C | D | E | F | G1 | G2 | G3 | G4 | H | R2 | P1 | P2 | P3 | P4 | I | J | K | A1 | A2 | O1 | O2 | O3 | L | M | N | T2 | Q | R3 | S | T | R4 | +1 | +2 | Count |   |   |   |   |   |
|------------|--------------------|----|----|----|----|----|----|----|---|----|---|---|---|---|----|----|----|----|---|----|----|----|----|----|---|---|---|----|----|----|----|----|---|---|---|----|---|----|---|---|----|----|----|-------|---|---|---|---|---|
| BGC0001968 | cadaside           | 0  | 0  | 1  | 0  | 0  | 0  | 0  | 0 | 0  | 0 | 0 | 0 | 1 | 0  | 0  | 0  | 0  | 0 | 0  | 0  | 0  | 1  | 0  | 0 | 0 | 0 | 1  | 2  | 0  | 0  | 0  | 0 | 2 | 0 | 0  | 0 | 0  | 0 | 0 | 0  | 0  | 0  | 0     | 0 | 8 |   |   |   |
| BGC0000378 | kutzneride         | 0  | 0  | 0  | 0  | 0  | 0  | 0  | 0 | 0  | 0 | 1 | 0 | 0 | 0  | 0  | 0  | 0  | 0 | 1  | 1  | 1  | 0  | 0  | 0 | 1 | 0 | 1  | 1  | 0  | 0  | 0  | 0 | 1 | 0 | 0  | 0 | 0  | 0 | 0 | 0  | 0  | 0  | 0     | 0 | 0 | 0 | 8 |   |
| BGC0001036 | polyoxypeptin      | 0  | 0  | 0  | 0  | 0  | 0  | 0  | 0 | 0  | 0 | 0 | 0 | 0 | 0  | 0  | 0  | 0  | 0 | 1  | 0  | 0  | 0  | 0  | 0 | 0 | 0 | 2  | 0  | 0  | 0  | 0  | 2 | 0 | 1 | 1  | 1 | 0  | 0 | 0 | 0  | 0  | 0  | 0     | 0 | 0 | 8 |   |   |
| BGC0001117 | himastatin         | 0  | 0  | 0  | 0  | 0  | 0  | 0  | 0 | 0  | 0 | 0 | 0 | 0 | 0  | 0  | 0  | 0  | 0 | 1  | 1  | 1  | 0  | 0  | 0 | 0 | 0 | 1  | 1  | 0  | 0  | 0  | 0 | 1 | 0 | 0  | 0 | 1  | 0 | 0 | 0  | 0  | 0  | 0     | 0 | 0 | 7 |   |   |
| BGC0001519 | aurantimycin       | 0  | 0  | 0  | 0  | 0  | 0  | 0  | 0 | 0  | 0 | 0 | 0 | 0 | 0  | 0  | 0  | 0  | 0 | 1  | 0  | 0  | 0  | 0  | 0 | 0 | 0 | 1  | 0  | 0  | 0  | 0  | 2 | 0 | 1 | 1  | 0 | 0  | 0 | 0 | 0  | 0  | 0  | 0     | 0 | 0 | 6 |   |   |
| BGC0000429 | skyllamycin        | 0  | 0  | 0  | 0  | 0  | 0  | 0  | 0 | 0  | 0 | 0 | 0 | 1 | 0  | 0  | 0  | 0  | 0 | 0  | 0  | 0  | 0  | 0  | 0 | 0 | 0 | 0  | 1  | 0  | 0  | 0  | 2 | 0 | 0 | 1  | 0 | 0  | 0 | 0 | 0  | 0  | 0  | 0     | 0 | 0 | 5 |   |   |
| BGC0001214 | marfomycin         | 0  | 0  | 0  | 0  | 0  | 0  | 0  | 0 | 0  | 0 | 0 | 0 | 1 | 0  | 0  | 0  | 0  | 0 | 0  | 1  | 1  | 1  | 1  | 0 | 0 | 0 | 0  | 0  | 0  | 0  | 0  | 0 | 0 | 0 | 0  | 0 | 0  | 0 | 0 | 0  | 0  | 0  | 0     | 0 | 0 | 0 | 5 |   |
| BGC0001975 | atratumycin        | 0  | 0  | 0  | 0  | 0  | 0  | 0  | 0 | 0  | 0 | 0 | 0 | 0 | 0  | 0  | 0  | 0  | 0 | 0  | 0  | 0  | 0  | 0  | 0 | 0 | 0 | 2  | 0  | 0  | 0  | 0  | 2 | 0 | 0 | 1  | 0 | 0  | 0 | 0 | 0  | 0  | 0  | 0     | 0 | 0 | 0 | 5 |   |
| BGC0000595 | SCO-2138           | 0  | 1  | 1  | 1  | 1  | 0  | 0  | 0 | 0  | 0 | 0 | 0 | 0 | 0  | 0  | 0  | 0  | 0 | 0  | 0  | 0  | 0  | 0  | 0 | 0 | 0 | 0  | 0  | 0  | 0  | 0  | 0 | 0 | 0 | 0  | 0 | 0  | 0 | 0 | 0  | 0  | 0  | 0     | 0 | 0 | 0 | 4 |   |
| BGC0000296 | actinomycin D      | 0  | 0  | 1  | 0  | 0  | 0  | 0  | 0 | 0  | 0 | 0 | 0 | 0 | 0  | 0  | 0  | 0  | 0 | 2  | 0  | 0  | 1  | 0  | 0 | 0 | 0 | 0  | 0  | 0  | 0  | 0  | 0 | 0 | 0 | 0  | 0 | 0  | 0 | 0 | 0  | 0  | 0  | 0     | 0 | 0 | 0 | 0 | 4 |
| BGC0000336 | daptomycin         | 0  | 0  | 0  | 0  | 0  | 0  | 0  | 0 | 0  | 0 | 0 | 0 | 1 | 0  | 0  | 0  | 0  | 0 | 0  | 0  | 0  | 0  | 0  | 0 | 0 | 0 | 0  | 2  | 0  | 0  | 0  | 0 | 0 | 0 | 0  | 1 | 0  | 0 | 0 | 0  | 0  | 0  | 0     | 0 | 0 | 0 | 0 | 4 |
| BGC0000439 | taromycin A        | 0  | 0  | 0  | 0  | 0  | 0  | 0  | 0 | 0  | 0 | 0 | 0 | 1 | 0  | 0  | 0  | 0  | 0 | 0  | 0  | 0  | 0  | 0  | 0 | 0 | 0 | 0  | 2  | 0  | 0  | 0  | 1 | 0 | 0 | 0  | 0 | 0  | 0 | 0 | 0  | 0  | 0  | 0     | 0 | 0 | 0 | 4 |   |
| BGC0000414 | qinocarcin         | 0  | 0  | 0  | 0  | 0  | 0  | 0  | 0 | 0  | 0 | 0 | 0 | 0 | 1  | 1  | 1  | 1  | 0 | 0  | 0  | 0  | 0  | 0  | 0 | 0 | 0 | 0  | 0  | 0  | 0  | 0  | 0 | 0 | 0 | 0  | 0 | 0  | 0 | 0 | 0  | 0  | 0  | 0     | 0 | 0 | 0 | 4 |   |
| BGC0000394 | naphthyridinomycin | 0  | 0  | 0  | 0  | 0  | 0  | 0  | 0 | 0  | 0 | 0 | 0 | 0 | 1  | 1  | 1  | 1  | 0 | 0  | 0  | 0  | 0  | 0  | 0 | 0 | 0 | 0  | 0  | 0  | 0  | 0  | 0 | 0 | 0 | 0  | 0 | 0  | 0 | 0 | 0  | 0  | 0  | 0     | 0 | 0 | 0 | 4 |   |
| BGC0001770 | clostridiolysin S  | 0  | 0  | 0  | 0  | 0  | 0  | 0  | 0 | 0  | 0 | 0 | 0 | 0 | 0  | 0  | 0  | 0  | 0 | 0  | 0  | 0  | 0  | 0  | 0 | 0 | 0 | 0  | 2  | 1  | 1  | 0  | 0 | 0 | 0 | 0  | 0 | 0  | 0 | 0 | 0  | 0  | 0  | 0     | 0 | 0 | 0 | 4 |   |
| BGC0001908 | sceliphrolactam    | 0  | 0  | 0  | 0  | 0  | 0  | 0  | 0 | 0  | 0 | 0 | 0 | 0 | 0  | 0  | 0  | 0  | 0 | 0  | 0  | 0  | 0  | 0  | 0 | 0 | 0 | 0  | 2  | 1  | 1  | 0  | 0 | 0 | 0 | 0  | 0 | 0  | 0 | 0 | 0  | 0  | 0  | 0     | 0 | 0 | 0 | 4 |   |
| BGC0000596 | SL2138             | 0  | 0  | 1  | 1  | 1  | 0  | 0  | 0 | 0  | 0 | 0 | 0 | 0 | 0  | 0  | 0  | 0  | 0 | 0  | 0  | 0  | 0  | 0  | 0 | 0 | 0 | 0  | 0  | 0  | 0  | 0  | 0 | 0 | 0 | 0  | 0 | 0  | 0 | 0 | 0  | 0  | 0  | 0     | 0 | 0 | 0 | 3 |   |
| BGC0000333 | cyclomarin         | 0  | 0  | 0  | 0  | 0  | 0  | 0  | 0 | 0  | 0 | 0 | 0 | 0 | 0  | 0  | 0  | 0  | 0 | 0  | 0  | 0  | 0  | 0  | 0 | 0 | 0 | 0  | 0  | 0  | 0  | 0  | 0 | 0 | 0 | 0  | 0 | 0  | 0 | 0 | 0  | 0  | 0  | 0     | 0 | 0 | 0 | 3 |   |
| BGC0001582 | ecumicin           | 0  | 0  | 0  | 0  | 0  | 0  | 0  | 0 | 0  | 0 | 0 | 0 | 1 | 0  | 0  | 0  | 0  | 0 | 1  | 0  | 0  | 0  | 1  | 0 | 0 | 0 | 0  | 0  | 0  | 0  | 0  | 0 | 0 | 0 | 0  | 0 | 0  | 0 | 0 | 0  | 0  | 0  | 0     | 0 | 0 | 0 | 3 |   |
| BGC0001297 | WS9326             | 0  | 0  | 0  | 0  | 0  | 0  | 0  | 0 | 0  | 0 | 0 | 0 | 1 | 0  | 0  | 0  | 0  | 0 | 0  | 0  | 0  | 0  | 0  | 1 | 0 | 0 | 0  | 0  | 1  | 0  | 0  | 0 | 0 | 0 | 0  | 0 | 0  | 0 | 0 | 0  | 0  | 0  | 0     | 0 | 0 | 0 | 3 |   |
| BGC0001443 | azanigerone        | 0  | 0  | 0  | 0  | 0  | 0  | 0  | 0 | 0  | 0 | 0 | 0 | 0 | 0  | 0  | 0  | 0  | 0 | 0  | 1  | 1  | 1  | 0  | 0 | 0 | 0 | 0  | 0  | 0  | 0  | 0  | 0 | 0 | 0 | 0  | 0 | 0  | 0 | 0 | 0  | 0  | 0  | 0     | 0 | 0 | 3 |   |   |
| BGC0001042 | sanglifehrin       | 0  | 0  | 0  | 0  | 0  | 0  | 0  | 0 | 0  | 0 | 0 | 0 | 0 | 0  | 0  | 0  | 0  | 0 | 0  | 1  | 1  | 0  | 0  | 0 | 0 | 0 | 0  | 0  | 0  | 0  | 0  | 0 | 0 | 0 | 0  | 0 | 0  | 0 | 0 | 0  | 0  | 1  | 0     | 0 | 0 | 3 |   |   |
| BGC0001752 | qinchelins         | 0  | 0  | 0  | 0  | 0  | 0  | 0  | 0 | 0  | 0 | 0 | 0 | 0 | 0  | 0  | 0  | 0  | 0 | 0  | 0  | 1  | 0  | 0  | 0 | 0 | 0 | 1  | 1  | 0  | 0  | 0  | 0 | 0 | 0 | 0  | 0 | 0  | 0 | 0 | 0  | 0  | 0  | 0     | 0 | 0 | 0 | 3 |   |
| BGC0000434 | SW-163C            | 0  | 0  | 0  | 0  | 0  | 0  | 0  | 0 | 0  | 0 | 0 | 0 | 0 | 0  | 0  | 0  | 0  | 0 | 0  | 0  | 0  | 0  | 0  | 0 | 1 | 0 | 1  | 0  | 0  | 0  | 0  | 0 | 0 | 0 | 0  | 0 | 0  | 0 | 0 | 0  | 0  | 0  | 0     | 0 | 0 | 0 | 3 |   |

**Table S22.** Genes encoding the borregomycin/anthrabenzoxocinone (*bab*) biosynthetic super cluster and their closest known homologues.

| Gene         | Start  | End    | Length (nt) | Strand  | <i>abx/bor</i> Homologue        | BLAST hit                                                                      | Cover | Identity | Putative Role                    |
|--------------|--------|--------|-------------|---------|---------------------------------|--------------------------------------------------------------------------------|-------|----------|----------------------------------|
| <i>orf-4</i> | 534    | 1,343  | 810         | forward | —                               | hypothetical protein [ <i>Streptomyces</i> sp. NRRL S-237]                     | 99%   | 62.54%   | —                                |
| <i>orf-3</i> | 1,340  | 2,407  | 1,068       | forward | —                               | hypothetical protein ACS04_32320 [ <i>Streptomyces roseus</i> ]                | 99%   | 52.04%   | —                                |
| <i>orf-2</i> | 2,563  | 3,744  | 1,182       | forward | —                               | hypothetical protein [ <i>Streptomyces indicus</i> ]                           | 92%   | 73.22%   | —                                |
| <i>orf-1</i> | 3,790  | 4,545  | 756         | forward | —                               | L,D-transpeptidase [ <i>Streptomyces indicus</i> ]                             | 93%   | 80.51%   | —                                |
| <i>babR1</i> | 4,742  | 6,301  | 1,560       | forward | —                               | sigma-70 family RNA polymerase sigma factor [ <i>Streptomyces</i> sp. MZ04]    | 99%   | 88.02%   | Regulation                       |
| <i>babR2</i> | 6,329  | 7,399  | 1,071       | reverse | —                               | AsnC family transcriptional regulator [ <i>Streptomyces</i> sp. CB01635]       | 93%   | 81.25%   | Regulation                       |
| <i>babT1</i> | 7,584  | 8,975  | 1,392       | forward | —                               | MFS transporter [ <i>Streptomyces atratus</i> ]                                | 99%   | 81.21%   | Transport                        |
| <i>babA</i>  | 8,972  | 10,183 | 1,212       | forward | —                               | amidohydrolase [ <i>Streptomyces</i> sp. AcE210]                               | 95%   | 78.65%   | Unknown                          |
| <i>babR3</i> | 10,203 | 10,988 | 786         | forward | —                               | DeoR/GlpR transcriptional regulator [ <i>Streptomyces</i> sp. MZ04]            | 99%   | 93.87%   | Regulation                       |
| <i>babB</i>  | 11,022 | 11,399 | 378         | forward | —                               | hypothetical protein [ <i>Nonomuraea</i> sp. NBRC 110462]                      | 99%   | 85.60%   | Unknown                          |
| <i>babC</i>  | 11,396 | 12,064 | 669         | forward | —                               | NUDIX domain-containing protein [ <i>Streptomyces</i> sp. or43]                | 97%   | 85.71%   | Unknown                          |
| <i>babD</i>  | 12,091 | 12,969 | 879         | forward | —                               | NAD(P)-dependent oxidoreductase [ <i>Streptomyces</i> sp. MZ04]                | 99%   | 88.70%   | Unknown                          |
| <i>babO1</i> | 12,991 | 14,208 | 1,218       | reverse | <i>borX3</i>                    | cytochrome P450 [ <i>Streptomyces albulus</i> ]                                | 96%   | 62.50%   | Rubottom-like oxidation          |
| <i>babO2</i> | 14,262 | 15,881 | 1,620       | reverse | <i>borC</i>                     | FAD-binding monooxygenase [ <i>Streptomyces</i> sp. NRRL B-1568]               | 97%   | 60.57%   | Oxygenation                      |
| <i>babM1</i> | 16,199 | 16,933 | 735         | forward | <i>AbxJ, AbxQ, BorM1</i>        | methyltransferase [ <i>Streptomyces</i> sp.]                                   | 99%   | 89.34%   | <i>N</i> -methyltransfer         |
| <i>babO3</i> | 16,963 | 18,594 | 1,632       | reverse | <i>abxL, borX1</i>              | FAD-dependent monooxygenase [ <i>Streptomyces</i> sp.]                         | 99%   | 87.93%   | Hydroxylation                    |
| <i>babM2</i> | 18,594 | 19,340 | 747         | reverse | <i>abxJ, abxQ, borM1, borM2</i> | methyltransferase [ <i>Streptomyces</i> sp.]                                   | 99%   | 94.33%   | <i>O</i> -methyltransfer         |
| <i>babR4</i> | 19,897 | 20,487 | 591         | reverse | <i>abxI, abxR1</i>              | TetR family transcriptional regulator [ <i>Streptomyces</i> sp.]               | 96%   | 97.37%   | Regulation                       |
| <i>babT2</i> | 20,568 | 22,160 | 1,593       | forward | <i>abxA, abxG</i>               | MFS transporter [ <i>Streptomyces</i> sp.]                                     | 99%   | 91.34%   | Transport                        |
| <i>babE</i>  | 22,600 | 23,340 | 741         | forward | <i>abxF</i>                     | glyoxalase [ <i>Streptomyces</i> sp.]                                          | 99%   | 77.14%   | Unknown                          |
| <i>babM3</i> | 23,412 | 24,446 | 1,035       | reverse | <i>abxM</i>                     | <i>O</i> -methyltransferase [ <i>Streptomyces</i> sp.]                         | 99%   | 93.29%   | <i>O</i> -methyltransfer         |
| <i>babF</i>  | 24,511 | 25,209 | 699         | reverse | <i>abxE</i>                     | 3-oxoacyl-(acyl-carrier protein) reductase [ <i>Streptomyces</i> sp.]          | 99%   | 90.52%   | Polyketide reduction             |
| <i>babT3</i> | 25,193 | 26,530 | 1,338       | reverse | <i>abxB</i>                     | potassium transporter [ <i>Streptomyces</i> sp.]                               | 99%   | 89.62%   | Transport                        |
| <i>babH1</i> | 26,530 | 27,807 | 1,278       | reverse | <i>abxH</i>                     | halogenase [ <i>Streptomyces</i> sp.]                                          | 99%   | 91.29%   | Halogenation                     |
| <i>babG</i>  | 27,851 | 28,207 | 357         | reverse | <i>abxD</i>                     | cyclase [ <i>Streptomyces</i> sp.]                                             | 94%   | 94.64%   | Polyketide cyclisation           |
| <i>babI</i>  | 28,204 | 28,695 | 492         | reverse | <i>abxC</i>                     | polyketide cyclase [ <i>Streptomyces</i> sp.]                                  | 99%   | 87.73%   | Polyketide cyclisation           |
| <i>babJ</i>  | 28,692 | 28,931 | 240         | reverse | <i>abxS</i>                     | putative acyl carrier protein [ <i>Streptomyces</i> sp.]                       | 98%   | 91.14%   | Polyketide biosynthesis          |
| <i>babK</i>  | 28,968 | 30,227 | 1,260       | reverse | <i>abxK</i>                     | keto-acyl synthase beta [ <i>Streptomyces</i> sp.]                             | 96%   | 92.36%   | Polyketide biosynthesis          |
| <i>babL</i>  | 30,224 | 31,489 | 1,266       | reverse | <i>abxP</i>                     | putative polyketide beta-ketoacyl synthase alpha [ <i>Streptomyces</i> sp.]    | 96%   | 95.10%   | Polyketide biosynthesis          |
| <i>babN</i>  | 31,486 | 31,887 | 402         | reverse | <i>abxR</i>                     | polyketide WhiE II [ <i>Streptomyces</i> sp.]                                  | 99%   | 91.73%   | Polyketide cyclisation           |
| <i>babP</i>  | 31,884 | 32,561 | 678         | reverse | <i>abxO</i>                     | WhiE ORF I SchA/CurD like domain protein [ <i>Streptomyces</i> sp.]            | 99%   | 79.57%   | Polyketide oxidation             |
| <i>babT4</i> | 32,680 | 34,155 | 1,476       | reverse | <i>abxA</i>                     | MFS transporter [ <i>Streptomyces</i> sp.]                                     | 99%   | 90.02%   | Transport                        |
| <i>babR5</i> | 34,270 | 34,935 | 666         | forward | <i>abxI, abxR1</i>              | transcriptional regulator TetR family [ <i>Streptomyces</i> sp.]               | 99%   | 89.59%   | Regulation                       |
| <i>babM4</i> | 34,898 | 35,953 | 1,056       | forward | <i>abxN</i>                     | methyltransferase protein [ <i>Streptomyces</i> sp.]                           | 99%   | 91.14%   | Gem-dimethylation                |
| <i>babR6</i> | 35,979 | 38,822 | 2,844       | reverse | <i>borR</i>                     | LuxR family transcriptional regulator [ <i>Streptomyces</i> sp. A1499]         | 96%   | 53.56%   | Regulation                       |
| <i>babR7</i> | 38,979 | 40,880 | 1,902       | reverse | —                               | AfsR/SARP family transcriptional regulator [ <i>Streptomyces sparsogenes</i> ] | 95%   | 63.10%   | Regulation                       |
| <i>babO4</i> | 41,031 | 42,299 | 1,269       | reverse | <i>borP, borX3</i>              | RebP-like cytochrome P450 [uncultured bacterium]                               | 97%   | 54.00%   | C-C bond formation               |
| <i>babQ</i>  | 42,324 | 45,542 | 3,219       | reverse | <i>borD</i>                     | MULTISPECIES: VioB - polyketide synthase [unclassified <i>Streptomyces</i> ]   | 99%   | 67.92%   | Chromopyrrolic acid biosynthesis |
| <i>babS</i>  | 45,539 | 47,002 | 1,464       | reverse | <i>borO</i>                     | FAD-dependent oxidoreductase [ <i>Streptomyces</i> sp. PT12]                   | 94%   | 67.67%   | Chromopyrrolic acid biosynthesis |
| <i>babH2</i> | 47,245 | 48,834 | 1,590       | forward | <i>borH</i>                     | MULTISPECIES: tryptophan 7-halogenase [unclassified <i>Streptomyces</i> ]      | 99%   | 74.10%   | Halogenation                     |
| <i>babU</i>  | 48,831 | 49,358 | 528         | forward | —                               | flavin reductase family protein [ <i>Streptomyces</i> sp. PT12]                | 92%   | 61.59%   | Unknown                          |
| <i>babV</i>  | 49,364 | 50,047 | 684         | reverse | —                               | alpha/beta hydrolase [ <i>Kribbella</i> sp. VKM Ac-2575]                       | 99%   | 77.97%   | Unknown                          |
| <i>babW</i>  | 50,044 | 50,532 | 489         | reverse | —                               | SnoaL-like domain-containing protein [ <i>Microtetraspora niveoalba</i> ]      | 90%   | 78.38%   | Unknown                          |
| <i>babX</i>  | 50,594 | 51,541 | 948         | reverse | —                               | zinc-binding dehydrogenase [ <i>Streptomyces</i> sp. Tu 3180]                  | 98%   | 84.62%   | Unknown                          |
| <i>babR8</i> | 51,677 | 52,309 | 633         | reverse | —                               | TetR family transcriptional regulator [ <i>Streptomyces</i> sp. Tu 3180]       | 99%   | 84.29%   | Regulation                       |
| <i>orf+1</i> | 52,608 | 52,967 | 360         | forward | —                               | hypothetical protein [ <i>Streptomyces</i> sp. BA2]                            | 94%   | 73.33%   | —                                |
| <i>orf+2</i> | 53,002 | 53,220 | 219         | forward | —                               | hypothetical protein [ <i>Streptomyces</i> sp. CB01635]                        | 93%   | 62.32%   | —                                |



**Table S24.** Biosynthetic gene clusters in the MST-144321 genome as predicted by AntiSMASH v4.0

| Region | Start   | End     | Cluster Fragment | Cluster Type                        | Top Hit             | Hit  |
|--------|---------|---------|------------------|-------------------------------------|---------------------|------|
| 1.1    | 78,083  | 102,289 | false            | terpene                             | Hopene              | 92%  |
| 1.2    | 261,832 | 319,609 | false            | terpene, NRPS                       | Griseobactin        | 52%  |
| 1.3    | 531,379 | 551,996 | false            | Linaridin                           | Formicamycins A-M   | 18%  |
| 1.4    | 585,905 | 658,441 | false            | T2PKS                               | Resistomycin        | 55%  |
| 2.1    | 620,926 | 678,899 | false            | NRPS, T1PKS                         | Oxazolomycin        | 15%  |
| 2.2    | 795,787 | 836,827 | false            | T3PKS                               | Akaeolide           | 12%  |
| 4.1    | 225,799 | 246,402 | false            | Terpene                             | Ebelactone          | 8%   |
| 4.2    | 437,486 | 458,784 | false            | Terpene                             | 2-methylisoborneol  | 100% |
| 4.3    | 476,366 | 487,178 | false            | bacteriocin                         | -                   | N/A  |
| 5.1    | 172,325 | 194,967 | false            | lanthipeptide                       | SapB                | 75%  |
| 7.1    | 430,007 | 440,423 | false            | Ectoine                             | Ectoine             | 100% |
| 8.1    | 105,937 | 126,965 | false            | Terpene                             | -                   | N/A  |
| 9.1    | 178,527 | 241,222 | false            | NRPS                                | Streptovaricin      | 19%  |
| 9.2    | 248,727 | 348,014 | false            | T2PKS, indole, butyrolactone, T1PKS | Anthrabenzoxocinone | 100% |
| 10.1   | 371,376 | 392,383 | false            | furan                               | Napyradiomycin      | 6%   |
| 11.1   | 110,567 | 122,333 | false            | siderophore                         | Desferrioxamine B   | 83%  |
| 13.1   | 66,041  | 80,913  | false            | siderophore                         | -                   | N/A  |
| 13.2   | 276,950 | 288,254 | false            | bacteriocin                         | -                   | N/A  |
| 14.1   | 15,792  | 26,265  | false            | melanin                             | Istamycin           | 7%   |
| 15.1   | 155,838 | 166,065 | false            | bacteriocin                         | -                   | N/A  |
| 15.2   | 204,535 | 219,371 | false            | siderophore                         | -                   | N/A  |
| 18.1   | 73,173  | 153,980 | false            | PKS-like, other, NRPS               | Kutznerides         | 24%  |
| 19.1   | 66,076  | 92,531  | false            | lanthipeptide                       | -                   | N/A  |
| 20.1   | 9,128   | 30,198  | false            | Terpene                             | Albaflavenone       | 100% |
| 21.1   | 1       | 117,825 | true             | NRPS, T2PKS, T1PKS                  | Xantholipin         | 36%  |
| 24.1   | 8,158   | 36,817  | true             | T1PKS                               | Hitachimycin        | 45%  |
| 25.1   | 1       | 33,020  | true             | other                               | Lavendiol           | 6%   |
| 29.1   | 1       | 13,550  | true             | T1PKS                               | Hitachimycin        | 27%  |
| 30.1   | 1       | 12,247  | true             | NRPS                                | -                   | N/A  |
| 34.1   | 1       | 4,043   | true             | T1PKS                               | Micromonolactam     | 100% |

**Table S25.** Homologues of proteins encoded by the tjipanazole (*tjp*) BGC in the genome of *Streptomyces* sp. MST-144321

| <b>Tjp</b> | <b>Top Hit</b> | <b>Identity</b> | <b>Coverage</b> | <b>Hit Function</b>             |
|------------|----------------|-----------------|-----------------|---------------------------------|
| 1          | BabS           | 41.8%           | 91.6%           | chromopyrolic acid biosynthesis |
| 2          | BabQ           | 42.9%           | 99.3%           | chromopyrolic acid biosynthesis |
| 3          | No hit         | —               | —               | —                               |
| 4          | BabM3          | 35.9%           | 96.3%           | <i>O</i> -methyltransferase     |
| 5          | No hit         | —               | —               | —                               |
| 6          | No hit         | —               | —               | —                               |
| 7          | BabO2          | 30.7%           | 72.5%           | chromopyrolic acid biosynthesis |
| 8          | BabO3          | 26.1%           | 84.7%           | hydroxylase                     |
| 9          | BabO4          | 41.1%           | 96.3%           | chromopyrolic acid biosynthesis |
| 10         | BabH2          | 42.0%           | 91.5%           | tryptophan-7-halogenase         |

**Table S26.** Media recipes**Agars**

| <b>Glycerol Casein Agar (CGA)</b>             |                 |
|-----------------------------------------------|-----------------|
| <i>Ingredient</i>                             | <i>Quantity</i> |
| Glycerol (Chem-Supply)                        | 30 g            |
| Casein peptone (Amyl)                         | 2 g             |
| K <sub>2</sub> HPO <sub>4</sub> (Chem-Supply) | 1 g             |
| NaCl (Chem-Supply)                            | 1 g             |
| MgSO <sub>4</sub> .7H <sub>2</sub> O (AnalaR) | 0.5 g           |
| Trace element solution*                       | 5 mL            |
| Distilled H <sub>2</sub> O                    | 1000 mL         |
| Bacteriological agar (Amyl)                   | 20 g            |
| Autoclave                                     |                 |

**\*Trace element solution**

|                                                                   |         |
|-------------------------------------------------------------------|---------|
| CaCl <sub>2</sub> .2H <sub>2</sub> O                              | 3 g     |
| FeC <sub>6</sub> O <sub>7</sub> H <sub>5</sub>                    | 1 g     |
| MnSO <sub>4</sub>                                                 | 0.2 g   |
| ZnCl <sub>2</sub>                                                 | 0.1 g   |
| CuSO <sub>4</sub> .5H <sub>2</sub> O                              | 0.025 g |
| Na <sub>2</sub> B <sub>4</sub> O <sub>7</sub> .10H <sub>2</sub> O | 0.02 g  |
| CoCl <sub>2</sub>                                                 | 0.004 g |
| Na <sub>2</sub> MoO <sub>4</sub> .2H <sub>2</sub> O               | 0.01 g  |
| Distilled H <sub>2</sub> O                                        | 1000 mL |
| Filter sterilize                                                  |         |

**ISP2 Agar (I2A)**

| <i>Ingredient</i>           | <i>Quantity</i> |
|-----------------------------|-----------------|
| Yeast extract (Difco)       | 4 g             |
| Malt extract (Difco)        | 10 g            |
| Glucose (Country Brewers)   | 4 g             |
| Distilled H <sub>2</sub> O  | 1000 mL         |
| Adjust pH to 7.3            |                 |
| Bacteriological agar (Amyl) | 20 g            |
| Autoclave                   |                 |

**N-Z Amine Agar (NZA)**

| <i>Ingredient</i>           | <i>Quantity</i> |
|-----------------------------|-----------------|
| Yeast extract (Difco)       | 4 g             |
| N-Z-Amine (Sigma)           | 10 g            |
| Glucose (Amyl)              | 4 g             |
| Distilled H <sub>2</sub> O  | 1000 mL         |
| Bacteriological Agar (Amyl) | 20 g            |
| Autoclave                   |                 |

**Nutrient Agar (NA)**

| <i>Ingredient</i>          | <i>Quantity</i> |
|----------------------------|-----------------|
| Nutrient Agar (Amyl)       | 26 g            |
| Distilled H <sub>2</sub> O | 1000 mL         |
| Autoclave                  |                 |

**Oatmeal Agar (OMA)**

| <i>Ingredient</i>          | <i>Quantity</i> |
|----------------------------|-----------------|
| Oatmeal Agar (Amyl)        | 72.5 g          |
| Distilled H <sub>2</sub> O | 1000 mL         |
| Autoclave                  |                 |

**Grains**

| <b>Cracked Wheat (BL)</b>  |                 |
|----------------------------|-----------------|
| <i>Ingredient</i>          | <i>Quantity</i> |
| Cracked Wheat              | 46 g            |
| Distilled H <sub>2</sub> O | 30 mL           |
| Autoclave                  |                 |

**Pearl Barley (PB)**

| <i>Ingredient</i>          | <i>Quantity</i> |
|----------------------------|-----------------|
| Pearl barley               | 48 g            |
| Distilled H <sub>2</sub> O | 35 mL           |
| Autoclave                  |                 |

**Jasmine Rice (JR)**

| <i>Ingredient</i>          | <i>Quantity</i> |
|----------------------------|-----------------|
| Jasmine rice               | 50 g            |
| Distilled H <sub>2</sub> O | 25 mL           |
| Autoclave                  |                 |

**Basmati rice (BS)**

| <i>Ingredient</i>          | <i>Quantity</i> |
|----------------------------|-----------------|
| Basmati rice               | 44 g            |
| Distilled H <sub>2</sub> O | 30 mL           |
| Autoclave                  |                 |



**Table S27.** Comparison of composition and abundance of secondary metabolites from methanolic extracts of *Streptomyces* sp. MST-144321 from various media.

| <b>Media</b>  | <b>AUC<br/>210<br/>nm</b> | <b>AUC<br/>254<br/>nm</b> | <b>Total<br/>Peaks</b> | <b>Peaks<br/>90%<br/>AUC</b> | <b>Peaks<br/>95%<br/>AUC</b> | <b>Peaks<br/>99%<br/>AUC</b> | <b>UV<br/>Classes</b> | <b>UV<br/>Unique</b> | <b>UV<br/>Unresolved</b> |
|---------------|---------------------------|---------------------------|------------------------|------------------------------|------------------------------|------------------------------|-----------------------|----------------------|--------------------------|
| CGA           | 939                       | 207                       | 33                     | 4                            | 8                            | 23                           | 4                     | 16                   | 2                        |
| I2A           | 434                       | 141                       | 17                     | 5                            | 8                            | 14                           | 3                     | 8                    | 0                        |
| NA            | 131                       | 24                        | 11                     | 5                            | 7                            | 9                            | 2                     | 2                    | 1                        |
| OMA           | 320                       | 106                       | 28                     | 10                           | 14                           | 23                           | 5                     | 10                   | 0                        |
| Cracked wheat | 596                       | 107                       | 58                     | 16                           | 24                           | 45                           | 8                     | 20                   | 5                        |
| Basmati rice  | 1502                      | 213                       | 50                     | 11                           | 15                           | 34                           | 6                     | 18                   | 3                        |
| Pearl barley  | 559                       | 172                       | 51                     | 17                           | 25                           | 41                           | 6                     | 27                   | 4                        |
| Jasmine rice  | 761                       | 179                       | 42                     | 13                           | 18                           | 31                           | 4                     | 16                   | 1                        |

The abundance and numbers of secondary metabolites were used as indices for quantifying the chemical diversity of an extract. Abundance was determined by calculation of the total area under the curve (AUC) at 210 and 254 nm and the positive and negative total ion current (TIC) traces from the mass detector. The higher the AUC the higher the secondary metabolite productivity of the organism on that media. The number of peaks eluting between 0.5 and 11 min were determined using the 210 nm channel and resolved peaks above the baseline were automatically counted. The greater the number of peaks, the greater the secondary metabolite diversity produced by the organism. The distribution of total peaks was further analysed by calculation of the number of peaks constituting 90%, 95% and 99% of the total AUC, respectively. The higher the number in each group, the more chemically diverse the extract. UV classes is the number of classes with two or more related UV spectra; UV unique is the number of peaks where the UV spectra appears once in the trace; UV unresolved is the number of peaks where the UV spectra is not clearly defined or resolved.

**Table S28.** cblaster search results for svetamycin against the NCBI database

| Organism                                       | Scaffold             | Start    | End      | Score   | T1 | C | D | E | F | G1 | G2 | G3 | G4 | H | R2 | P1 | P2 | P3 | P4 | I | J | K | A1 | A2 | O1 | O2 | O3 |
|------------------------------------------------|----------------------|----------|----------|---------|----|---|---|---|---|----|----|----|----|---|----|----|----|----|----|---|---|---|----|----|----|----|----|
| <i>Pseudonocardia</i> sp. HH130629-09          | NZ_CP011868.1        | 5700061  | 5753546  | 20.1383 | 1  | 1 | 1 | 1 | 1 | 0  | 0  | 0  | 0  | 0 | 1  | 1  | 1  | 0  | 0  | 0 | 0 | 1 | 2  | 1  | 1  | 0  | 0  |
| <i>Pseudonocardia</i> sp. HH130629-09          | CP011868.1           | 5700061  | 5753546  | 17.1211 | 1  | 0 | 1 | 1 | 1 | 0  | 0  | 0  | 0  | 0 | 1  | 1  | 1  | 0  | 0  | 0 | 0 | 1 | 2  | 1  | 1  | 0  | 0  |
| <i>Kutzneria buriramensis</i> DSM 45791        | NZ_QUNO01000006.1    | 100638   | 147810   | 14.5744 | 0  | 1 | 1 | 1 | 1 | 0  | 0  | 0  | 0  | 0 | 1  | 1  | 1  | 0  | 0  | 0 | 0 | 0 | 2  | 1  | 0  | 0  | 0  |
| <i>Kutzneria buriramensis</i> DSM 45791        | QUNO01000006.1       | 100638   | 147810   | 14.5744 | 0  | 1 | 1 | 1 | 1 | 0  | 0  | 0  | 0  | 0 | 1  | 1  | 1  | 0  | 0  | 0 | 0 | 0 | 2  | 1  | 0  | 0  | 0  |
| <i>Pseudonocardia</i> sp. EC080625-04          | NZ_CP010990.1        | 237106   | 243317   | 12.1857 | 1  | 1 | 1 | 1 | 1 | 0  | 0  | 0  | 0  | 0 | 1  | 1  | 0  | 0  | 0  | 0 | 0 | 0 | 0  | 0  | 0  | 0  | 0  |
| <i>Nonomuraea</i> sp.                          | JABFWI010000668.1    | 3256     | 29156    | 9.961   | 0  | 0 | 0 | 0 | 1 | 0  | 0  | 0  | 0  | 0 | 0  | 1  | 1  | 0  | 0  | 0 | 0 | 1 | 2  | 1  | 0  | 0  | 0  |
| <i>Pseudonocardia</i> sp. EC080625-04          | CP010990.1           | 237106   | 243317   | 9.1668  | 1  | 0 | 1 | 1 | 1 | 0  | 0  | 0  | 0  | 0 | 1  | 1  | 0  | 0  | 0  | 0 | 0 | 0 | 0  | 0  | 0  | 0  | 0  |
| <i>Actinospica acidiphila</i> SID13773         | JAAGLZ010000089.1    | 17204    | 48690    | 8.2167  | 0  | 0 | 0 | 0 | 1 | 0  | 0  | 0  | 0  | 0 | 2  | 1  | 1  | 0  | 0  | 0 | 0 | 0 | 1  | 0  | 0  | 0  | 0  |
| <i>Micromonospora</i> sp. M71_S20              | RCCV01000001.1       | 3932533  | 3950679  | 8.1133  | 0  | 0 | 0 | 0 | 0 | 0  | 0  | 0  | 0  | 0 | 1  | 1  | 1  | 1  | 0  | 1 | 0 | 0 | 0  | 0  | 0  | 0  | 0  |
| <i>Micromonospora</i> sp. M71_S20              | NZ_RCCV01000001.1    | 3932533  | 3950679  | 8.1132  | 0  | 0 | 0 | 0 | 0 | 0  | 0  | 0  | 0  | 0 | 1  | 1  | 1  | 1  | 0  | 1 | 0 | 0 | 0  | 0  | 0  | 0  | 0  |
| <i>Pseudonocardia</i> sp. EC080625-04          | NZ_CP010990.1        | 57868    | 84467    | 7.9549  | 0  | 0 | 0 | 0 | 0 | 0  | 0  | 0  | 0  | 0 | 0  | 0  | 1  | 0  | 0  | 0 | 0 | 1 | 2  | 1  | 1  | 0  | 0  |
| <i>Pseudonocardia</i> sp. EC080625-04          | CP010990.1           | 57820    | 84467    | 7.9532  | 0  | 0 | 0 | 0 | 0 | 0  | 0  | 0  | 0  | 0 | 0  | 0  | 1  | 0  | 0  | 0 | 0 | 1 | 2  | 1  | 1  | 0  | 0  |
| <i>Actinomadura</i> sp. 14C53                  | NZ_VCKW01000026.1    | 4161     | 37202    | 7.6525  | 0  | 0 | 0 | 0 | 2 | 0  | 0  | 0  | 0  | 0 | 1  | 1  | 1  | 0  | 0  | 0 | 0 | 0 | 1  | 1  | 0  | 0  | 0  |
| <i>Actinomadura</i> sp. 14C53                  | VCKW01000026.1       | 4161     | 37202    | 7.652   | 0  | 0 | 0 | 0 | 2 | 0  | 0  | 0  | 0  | 0 | 1  | 1  | 1  | 0  | 0  | 0 | 0 | 0 | 1  | 1  | 0  | 0  | 0  |
| <i>Amycolatopsis oliviviridis</i> CGMCC 4.7683 | NZ_BNAY01000001.1    | 229211   | 239905   | 7.2427  | 0  | 0 | 0 | 0 | 0 | 0  | 0  | 0  | 0  | 0 | 1  | 0  | 1  | 1  | 1  | 0 | 1 | 0 | 0  | 0  | 0  | 0  | 0  |
| <i>Actinalloteichus</i> sp. GBA129-24          | CP016077.1           | 3709615  | 3748979  | 7.2255  | 0  | 0 | 0 | 0 | 1 | 0  | 0  | 0  | 0  | 0 | 0  | 1  | 1  | 0  | 0  | 1 | 0 | 0 | 1  | 0  | 0  | 0  | 1  |
| <i>Amycolatopsis jiangsuensis</i> DSM 45859    | JACHMG010000001.1    | 4186728  | 4193244  | 7.1933  | 0  | 0 | 0 | 0 | 0 | 0  | 0  | 0  | 0  | 0 | 0  | 0  | 0  | 0  | 0  | 0 | 0 | 0 | 0  | 0  | 5  | 1  | 3  |
| <i>Amycolatopsis jiangsuensis</i> DSM 45859    | NZ_JACHMG010000001.1 | 4187004  | 4193244  | 7.193   | 0  | 0 | 0 | 0 | 0 | 0  | 0  | 0  | 0  | 0 | 0  | 0  | 0  | 0  | 0  | 0 | 0 | 0 | 0  | 0  | 5  | 1  | 3  |
| <i>Kutzneria</i> sp. 744                       | NZ_KK037166.1        | 10094720 | 10116260 | 7.1795  | 0  | 0 | 0 | 0 | 1 | 0  | 0  | 0  | 0  | 0 | 1  | 1  | 1  | 0  | 0  | 1 | 1 | 0 | 0  | 0  | 0  | 0  | 0  |
| <i>Actinosynnema</i> sp. ALI-1.44              | MTQO01000036.1       | 4495     | 8703     | 7.1791  | 0  | 0 | 0 | 0 | 0 | 1  | 1  | 1  | 1  | 0 | 0  | 0  | 0  | 0  | 0  | 0 | 0 | 0 | 0  | 0  | 0  | 0  | 0  |
| <i>Actinosynnema</i> sp. ALI-1.44              | NZ_MTQO01000036.1    | 4495     | 8733     | 7.179   | 0  | 0 | 0 | 0 | 0 | 1  | 1  | 1  | 1  | 0 | 0  | 0  | 0  | 0  | 0  | 0 | 0 | 0 | 0  | 0  | 0  | 0  | 0  |
| <i>Actinocristum wychmicini</i> DSM 45934      | SLWS01000021.1       | 2232     | 6447     | 7.1715  | 0  | 0 | 0 | 0 | 0 | 1  | 1  | 1  | 1  | 0 | 0  | 0  | 0  | 0  | 0  | 0 | 0 | 0 | 0  | 0  | 0  | 0  | 0  |
| <i>Actinocristum wychmicini</i> DSM 45934      | NZ_SLWS01000021.1    | 2232     | 6294     | 7.1714  | 0  | 0 | 0 | 0 | 0 | 1  | 1  | 1  | 1  | 0 | 0  | 0  | 0  | 0  | 0  | 0 | 0 | 0 | 0  | 0  | 0  | 0  | 0  |
| <i>Kitasatospora aureofaciens</i> NRRL B-1286  | NZ_JNWR01000011.1    | 95621    | 125008   | 7.1651  | 0  | 0 | 0 | 0 | 0 | 0  | 0  | 0  | 0  | 0 | 0  | 1  | 1  | 1  | 1  | 0 | 0 | 1 | 0  | 0  | 0  | 0  | 0  |
| <i>Kitasatospora aureofaciens</i> ATCC 10762   | JPRF03000028.1       | 38912    | 68316    | 7.1646  | 0  | 0 | 0 | 0 | 0 | 0  | 0  | 0  | 0  | 0 | 0  | 1  | 1  | 1  | 1  | 0 | 0 | 1 | 0  | 0  | 0  | 0  | 0  |

Results limited to the top 25 of 2,363 hits. Columns T1 – O3 represent Sve protein homologues. Empty cells outside of this region are omitted for clarity. Importantly, homologues of SveG1-G4 are not present in *Pseudonocardia* spp. known to produce gerumycin, indicating that they incorporate their starter units by an alternative mechanism.

**Table S29.** Single-crystal XRD experimental details for svetamycin A (3)

| <b>Crystal data</b>                                                                                                   |                                                                                                                                                                                                                                                                                             |
|-----------------------------------------------------------------------------------------------------------------------|---------------------------------------------------------------------------------------------------------------------------------------------------------------------------------------------------------------------------------------------------------------------------------------------|
| <b>Chemical formula</b>                                                                                               | C <sub>24</sub> H <sub>35</sub> ClN <sub>8</sub> O <sub>10</sub>                                                                                                                                                                                                                            |
| <b><i>M<sub>r</sub></i></b>                                                                                           | 631.05                                                                                                                                                                                                                                                                                      |
| <b>Crystal system, space group</b>                                                                                    | Orthorhombic, <i>P</i> 2 <sub>1</sub> 2 <sub>1</sub> 2 <sub>1</sub>                                                                                                                                                                                                                         |
| <b>Temperature (K)</b>                                                                                                | 100                                                                                                                                                                                                                                                                                         |
| <b><i>a</i>, <i>b</i>, <i>c</i> (Å)</b>                                                                               | 6.7387 (1), 9.5889 (1), 44.6727 (4)                                                                                                                                                                                                                                                         |
| <b><i>V</i> (Å<sup>3</sup>)</b>                                                                                       | 2886.60 (6)                                                                                                                                                                                                                                                                                 |
| <b><i>Z</i></b>                                                                                                       | 4                                                                                                                                                                                                                                                                                           |
| <b>Radiation type</b>                                                                                                 | Cu <i>K</i> α                                                                                                                                                                                                                                                                               |
| <b><i>m</i> (mm<sup>-1</sup>)</b>                                                                                     | 1.78                                                                                                                                                                                                                                                                                        |
| <b>Crystal size (mm)</b>                                                                                              | 0.16 × 0.14 × 0.05                                                                                                                                                                                                                                                                          |
| <b>Data collection</b>                                                                                                |                                                                                                                                                                                                                                                                                             |
| <b>Diffractometer</b>                                                                                                 | XtaLAB Synergy, Single source at home/near, HyPix                                                                                                                                                                                                                                           |
| <b>Absorption correction</b>                                                                                          | Gaussian<br><i>CrysAlis PRO</i> 1.171.41.103a (Rigaku Oxford Diffraction, 2021) Numerical absorption correction based on Gaussian integration over a multifaceted crystal model Empirical absorption correction using spherical harmonics, implemented in SCALE3 ABSPACK scaling algorithm. |
| <b><i>T<sub>min</sub></i>, <i>T<sub>max</sub></i></b>                                                                 | 0.844, 1.000                                                                                                                                                                                                                                                                                |
| <b>No. of measured, independent and observed [<i>I</i> &gt; 2<i>s</i>(<i>I</i>)] reflections</b>                      | 44662, 5890, 5663                                                                                                                                                                                                                                                                           |
| <b><i>R<sub>int</sub></i></b>                                                                                         | 0.061                                                                                                                                                                                                                                                                                       |
| <b>(<i>sin q/l</i>)<sub>max</sub> (Å<sup>-1</sup>)</b>                                                                | 0.628                                                                                                                                                                                                                                                                                       |
| <b>Refinement</b>                                                                                                     |                                                                                                                                                                                                                                                                                             |
| <b><i>R</i>[<i>F</i><sup>2</sup> &gt; 2<i>s</i>(<i>F</i><sup>2</sup>)], <i>wR</i>(<i>F</i><sup>2</sup>), <i>S</i></b> | 0.033, 0.084, 1.04                                                                                                                                                                                                                                                                          |
| <b>No. of reflections</b>                                                                                             | 5890                                                                                                                                                                                                                                                                                        |
| <b>No. of parameters</b>                                                                                              | 393                                                                                                                                                                                                                                                                                         |
| <b>H-atom treatment</b>                                                                                               | H-atom parameters constrained                                                                                                                                                                                                                                                               |
| <b><i>D</i><sub>ρmax</sub>, <i>D</i><sub>ρmin</sub> (e Å<sup>-3</sup>)</b>                                            | 0.21, -0.22                                                                                                                                                                                                                                                                                 |
| <b>Absolute structure</b>                                                                                             | Flack <i>x</i> determined using 2272 quotients [( <i>I</i> <sup>+</sup> )−( <i>I</i> <sup>−</sup> )]/[( <i>I</i> <sup>+</sup> )+(− <i>I</i> <sup>−</sup> )] (Parsons, Flack and Wagner, Acta Cryst. B69 (2013) 249-259).                                                                    |
| <b>Absolute structure parameter</b>                                                                                   | 0.000(7)                                                                                                                                                                                                                                                                                    |

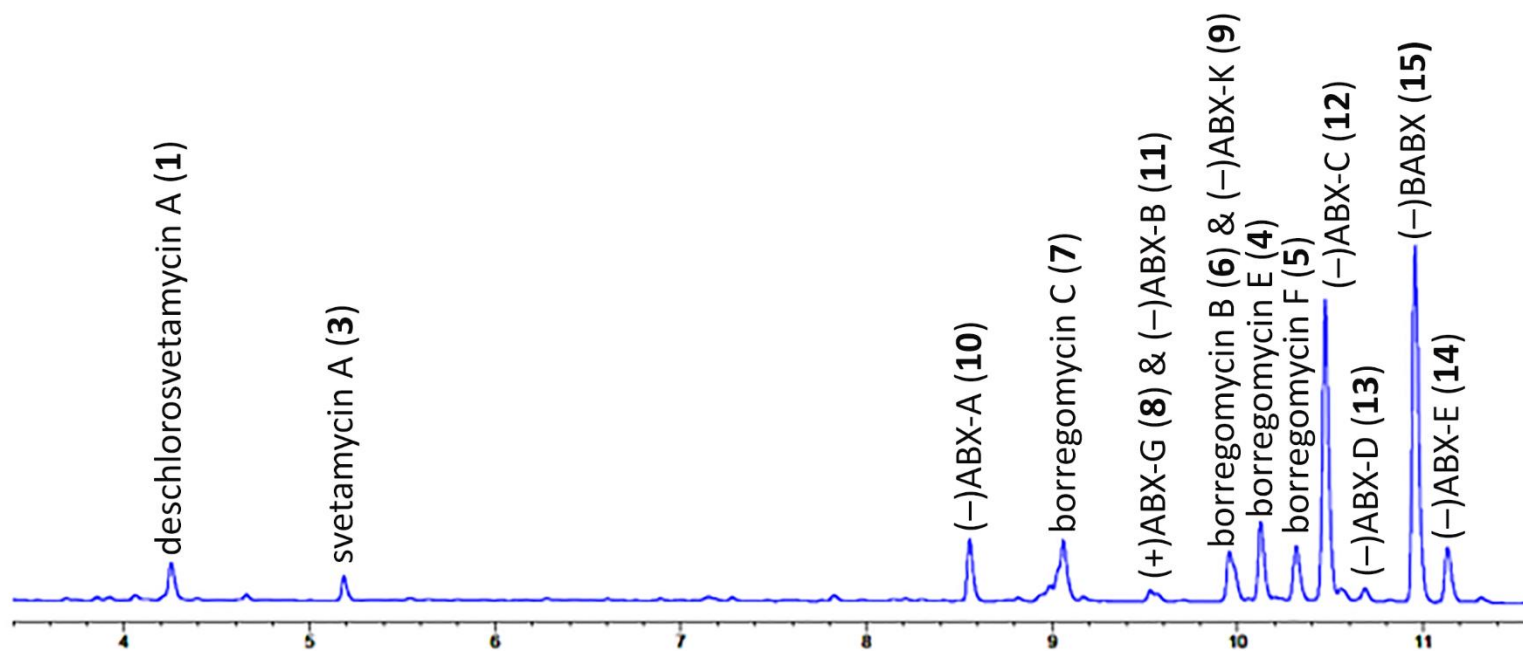

**Figure S1.** HPLC trace of crude ethyl acetate extract of *Streptomyces* sp. MST-144321 after cultivation on pearl barley media for 10 days

a. CGA

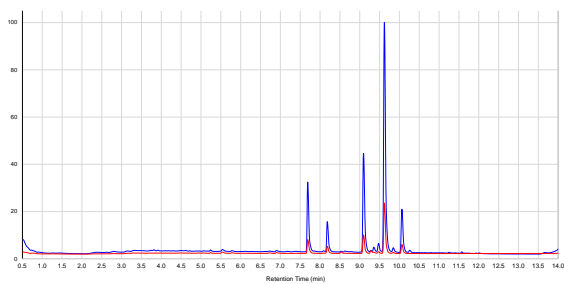

b. ISP2

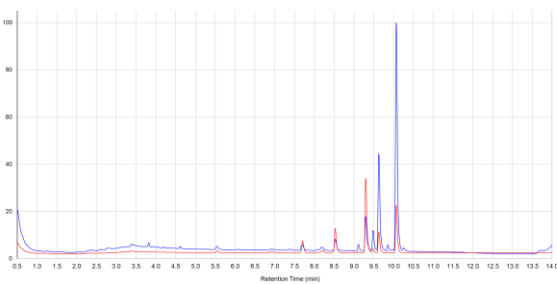

c. NA

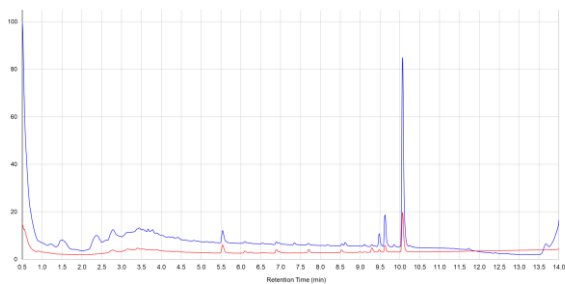

d. OMA

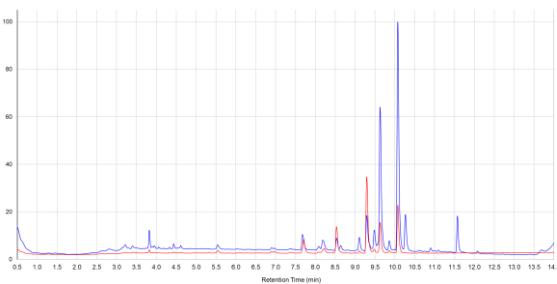

e. Cracked wheat

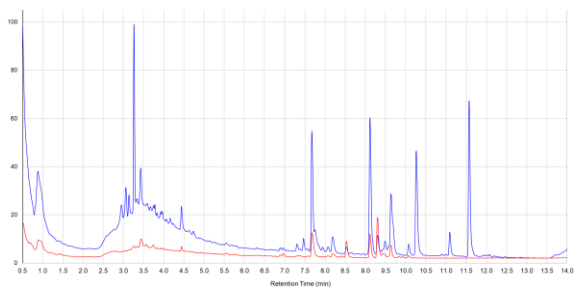

f. Basmati rice

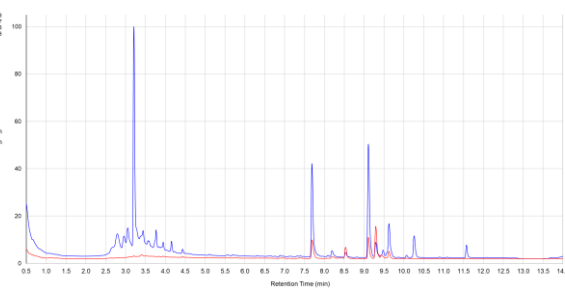

g. Jasmine rice

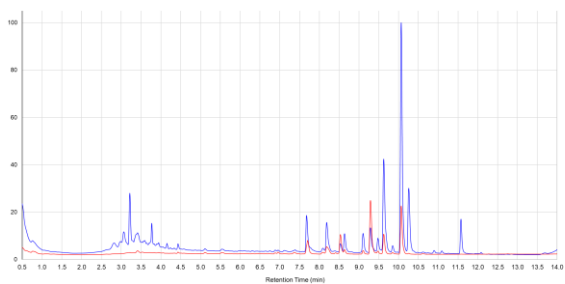

h. Pearl barley

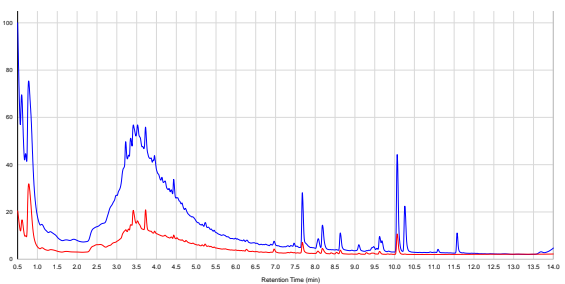

**Figure S2.** HPLC traces of the methanolic extracts of *Streptomyces sp.* MST-144321 grown on various media for 7 days at 28 °C.

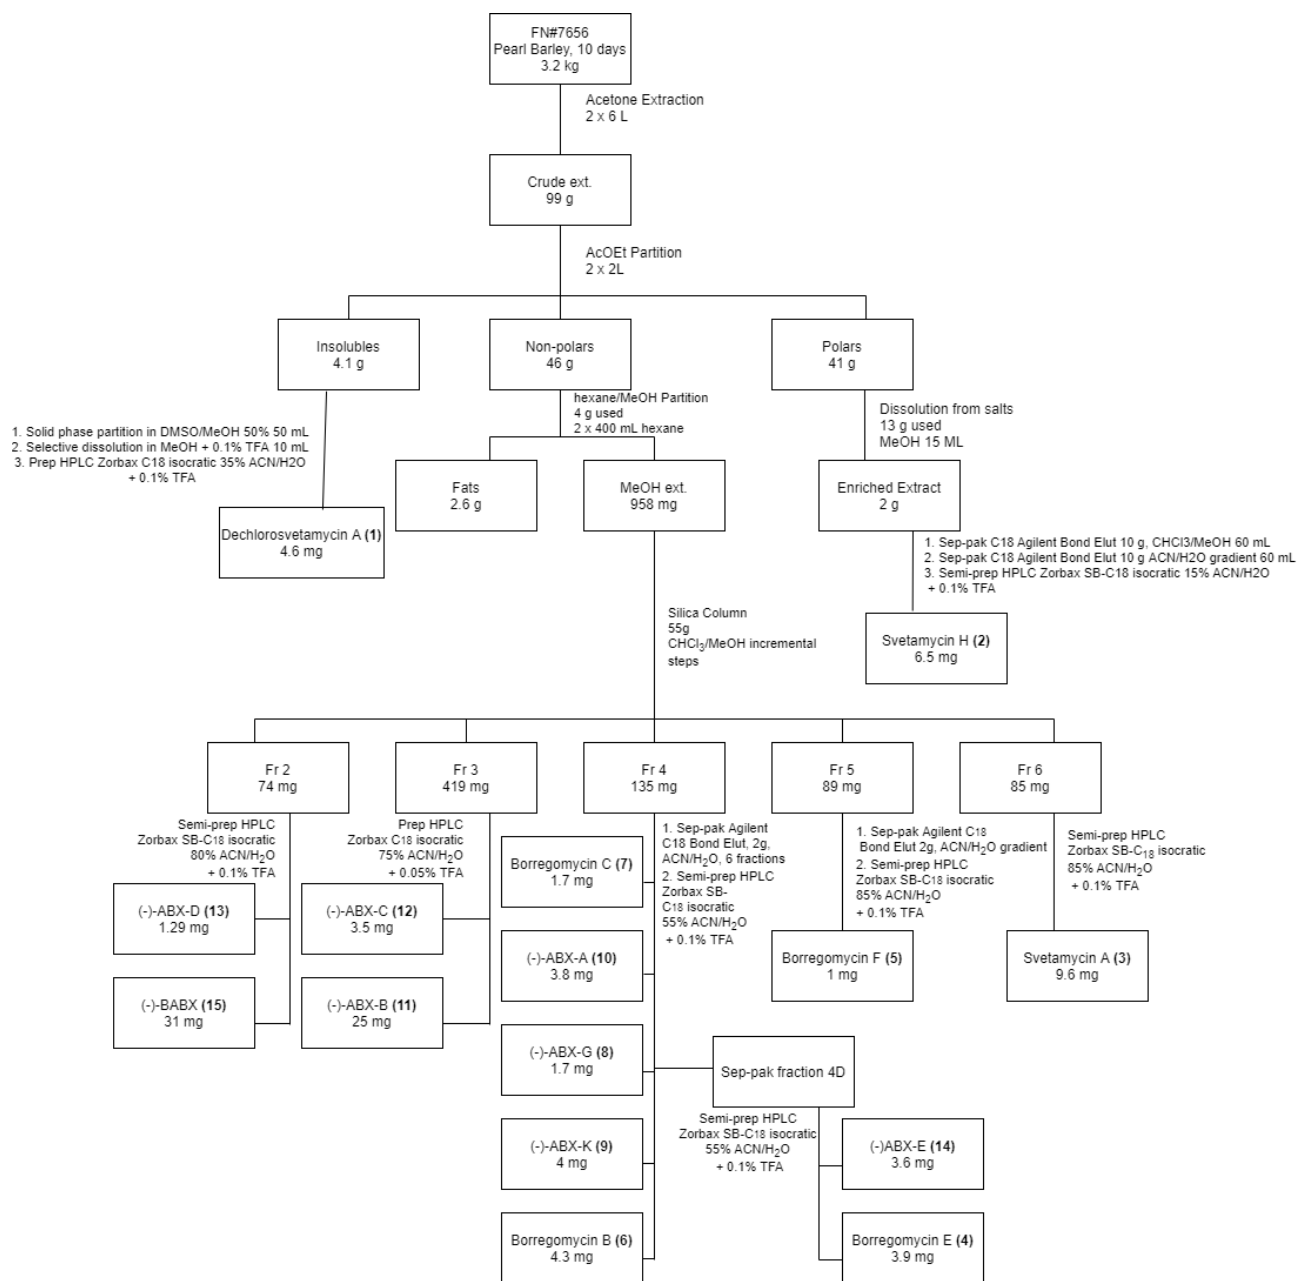

**Figure S3.** Fractionation of crude ethyl acetate extract of *Streptomyces* sp. MST-144321 after cultivation on pearl barley media for 10 days

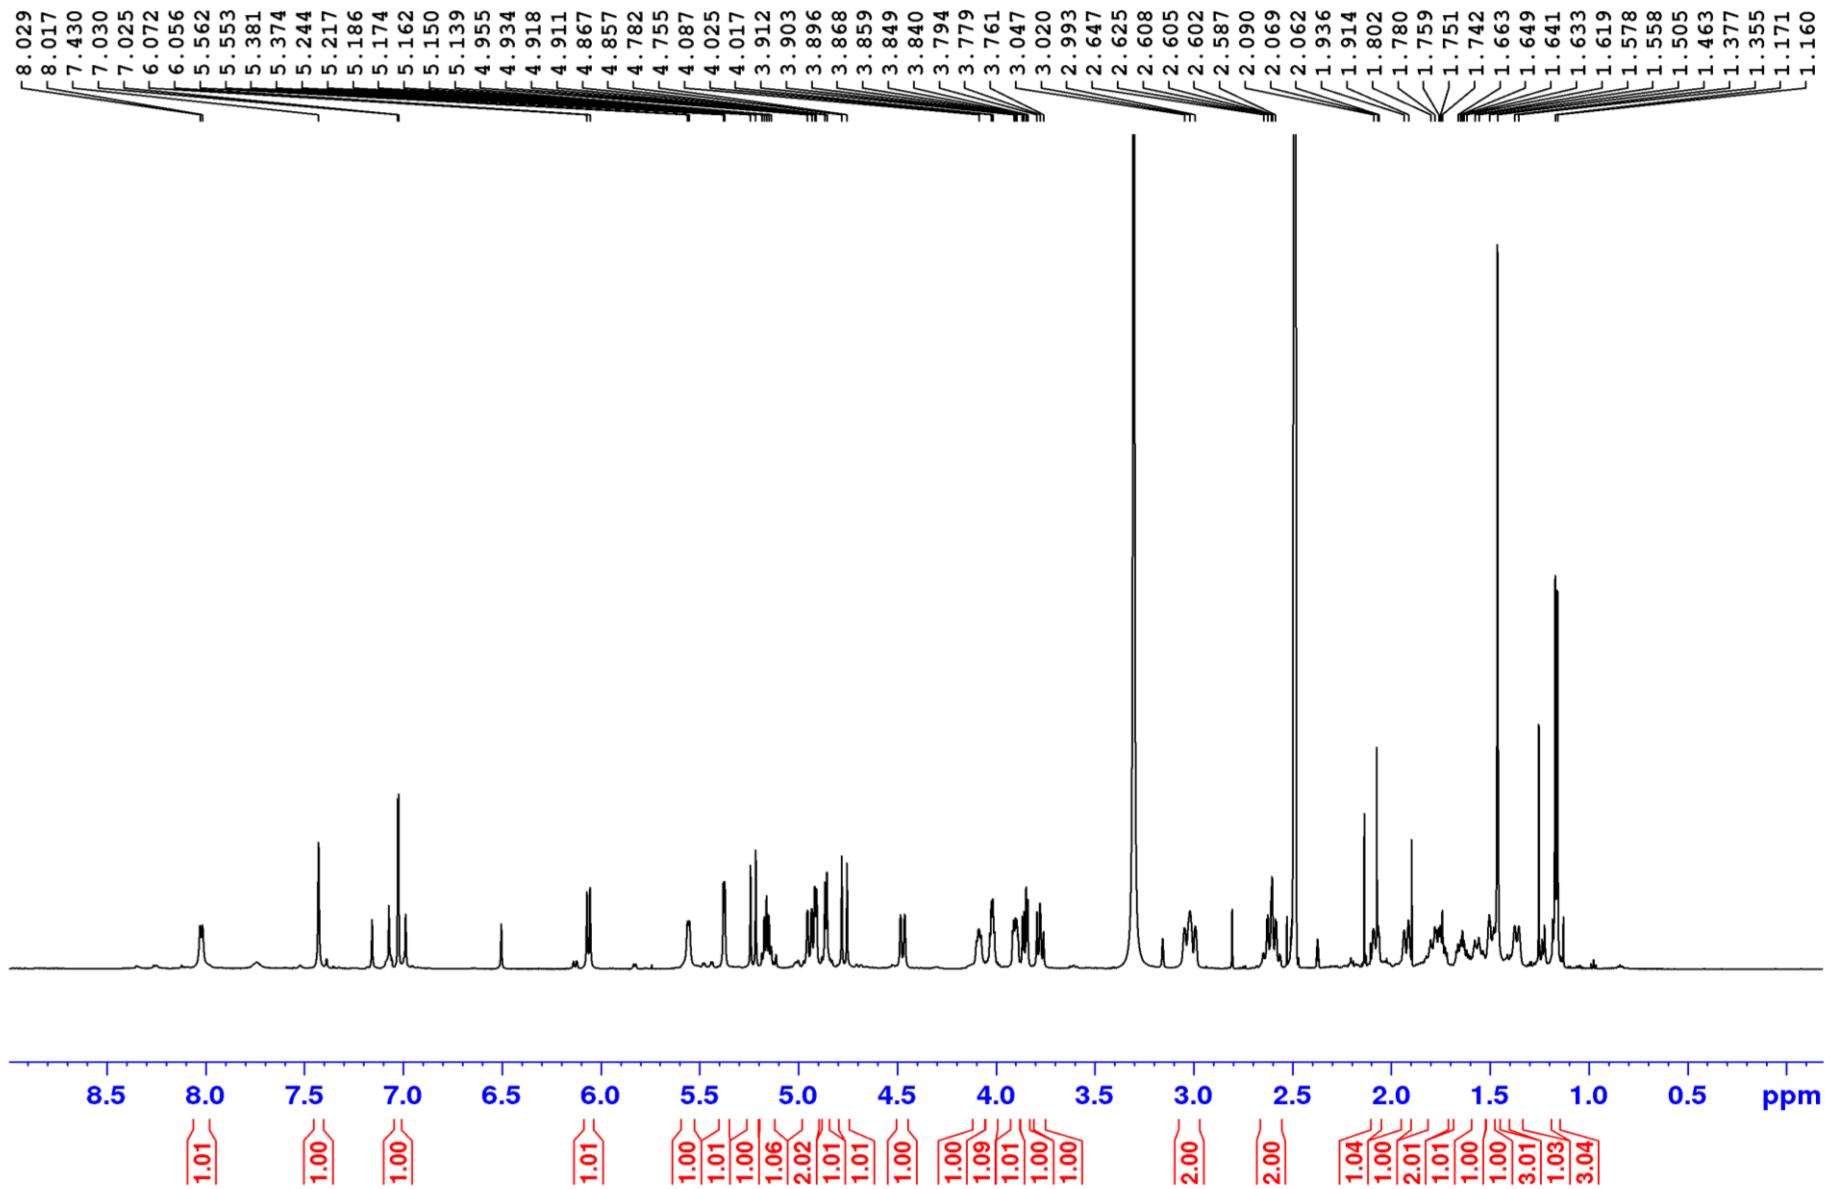

Figure S4.  $^1\text{H}$  NMR spectrum (600 MHz,  $\text{DMSO-}d_6$ ) of deschlorosvetamycin A (1)

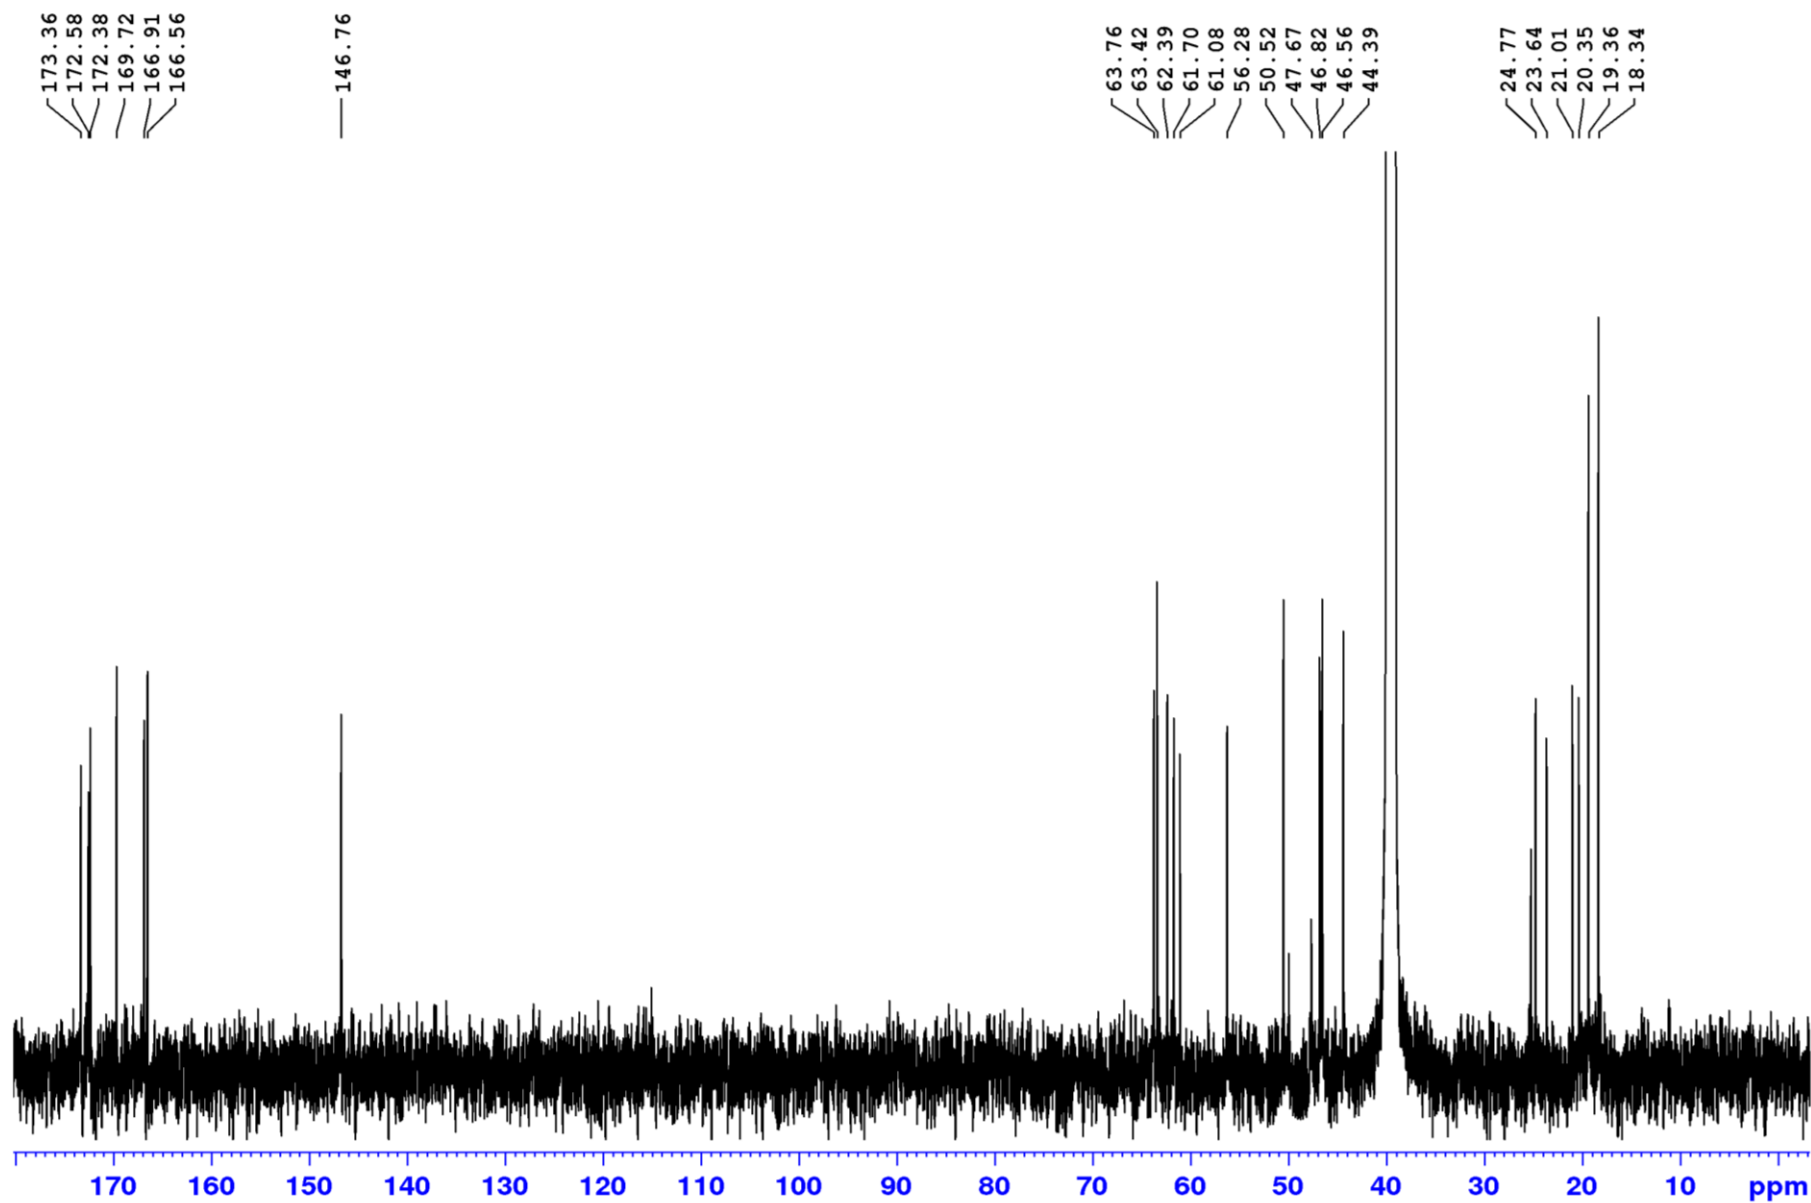

Figure S5.  $^{13}\text{C}$  NMR spectrum (150 MHz,  $\text{DMSO-}d_6$ ) of deschlorosvetamycin A (1)



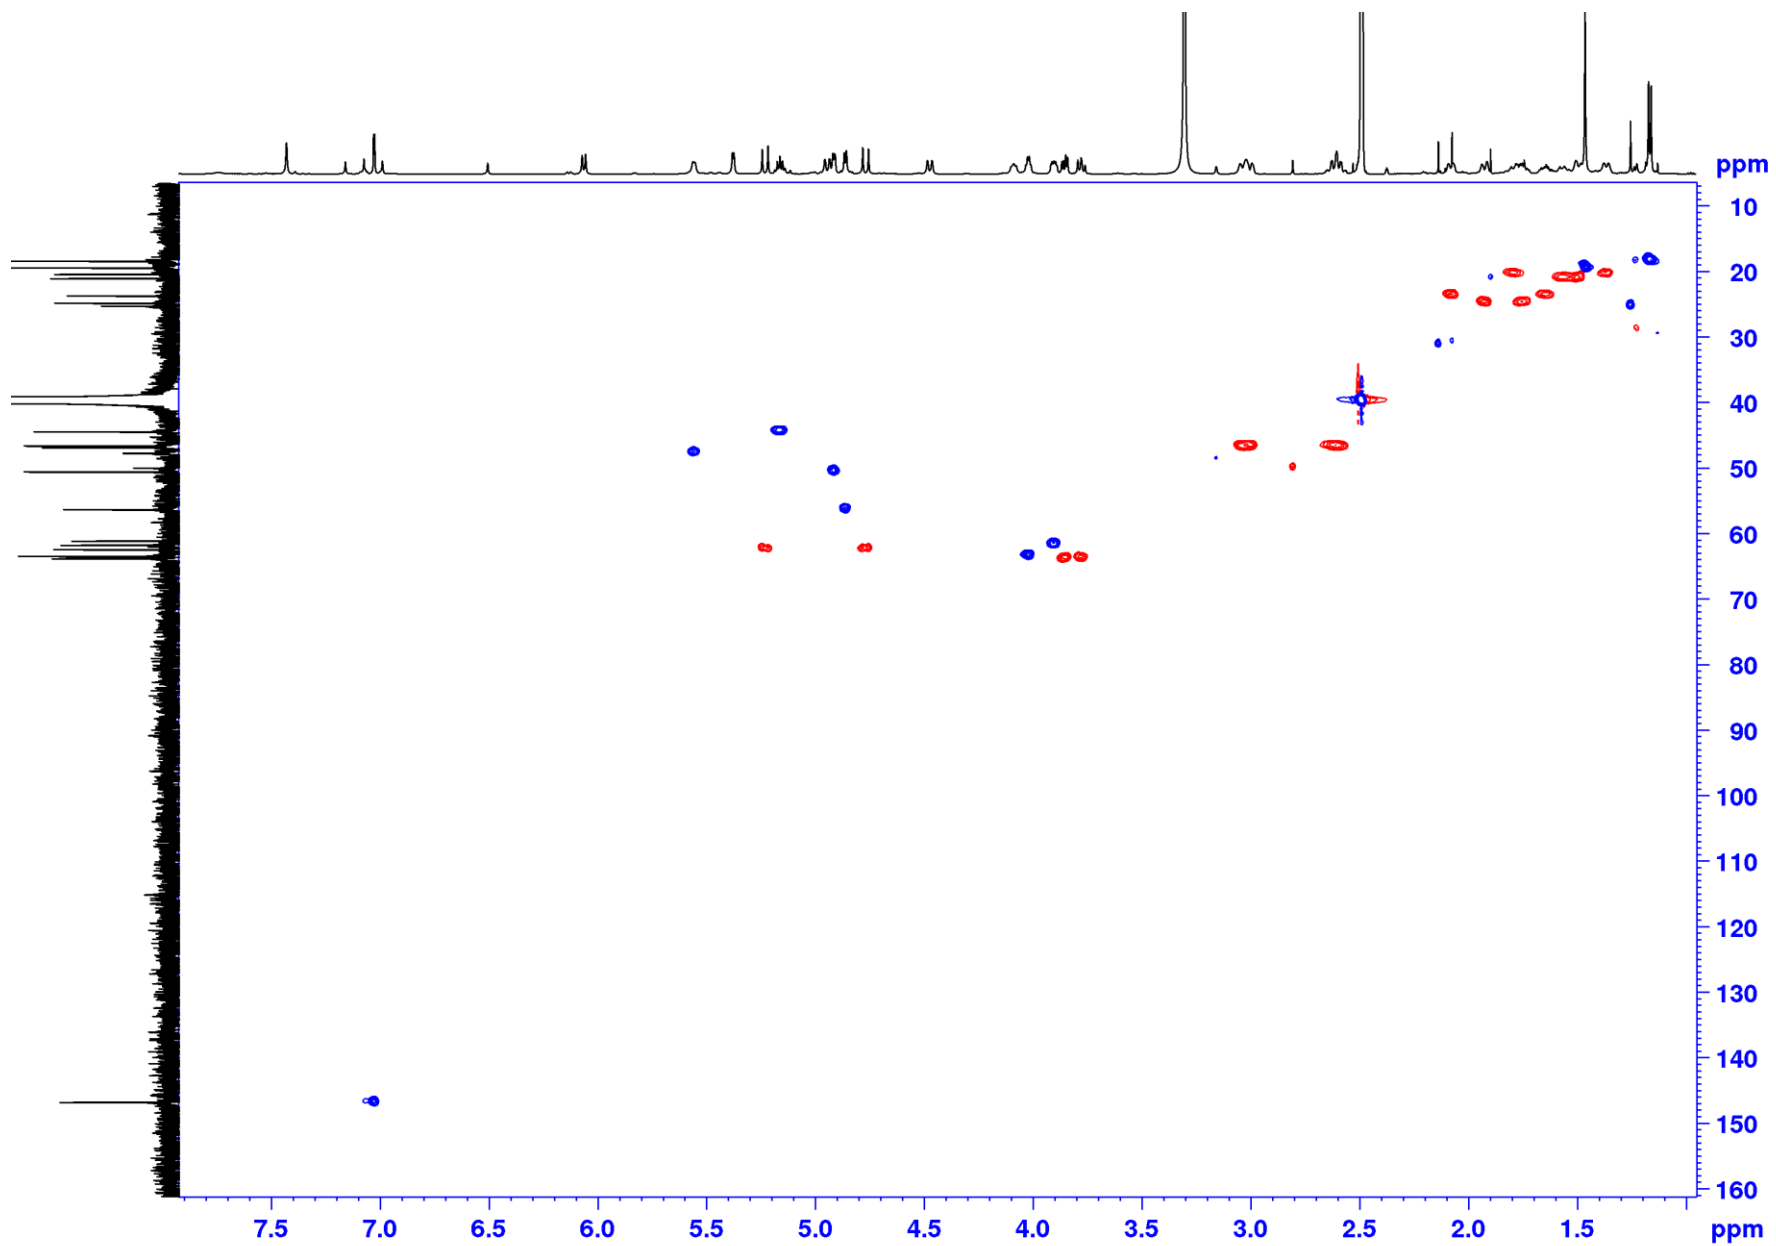

**Figure S6.**  $^1\text{H}$ - $^{13}\text{C}$  HSQC NMR spectrum (600 MHz,  $\text{DMSO-}d_6$ ) of deschlorosvetamycin A (**1**)

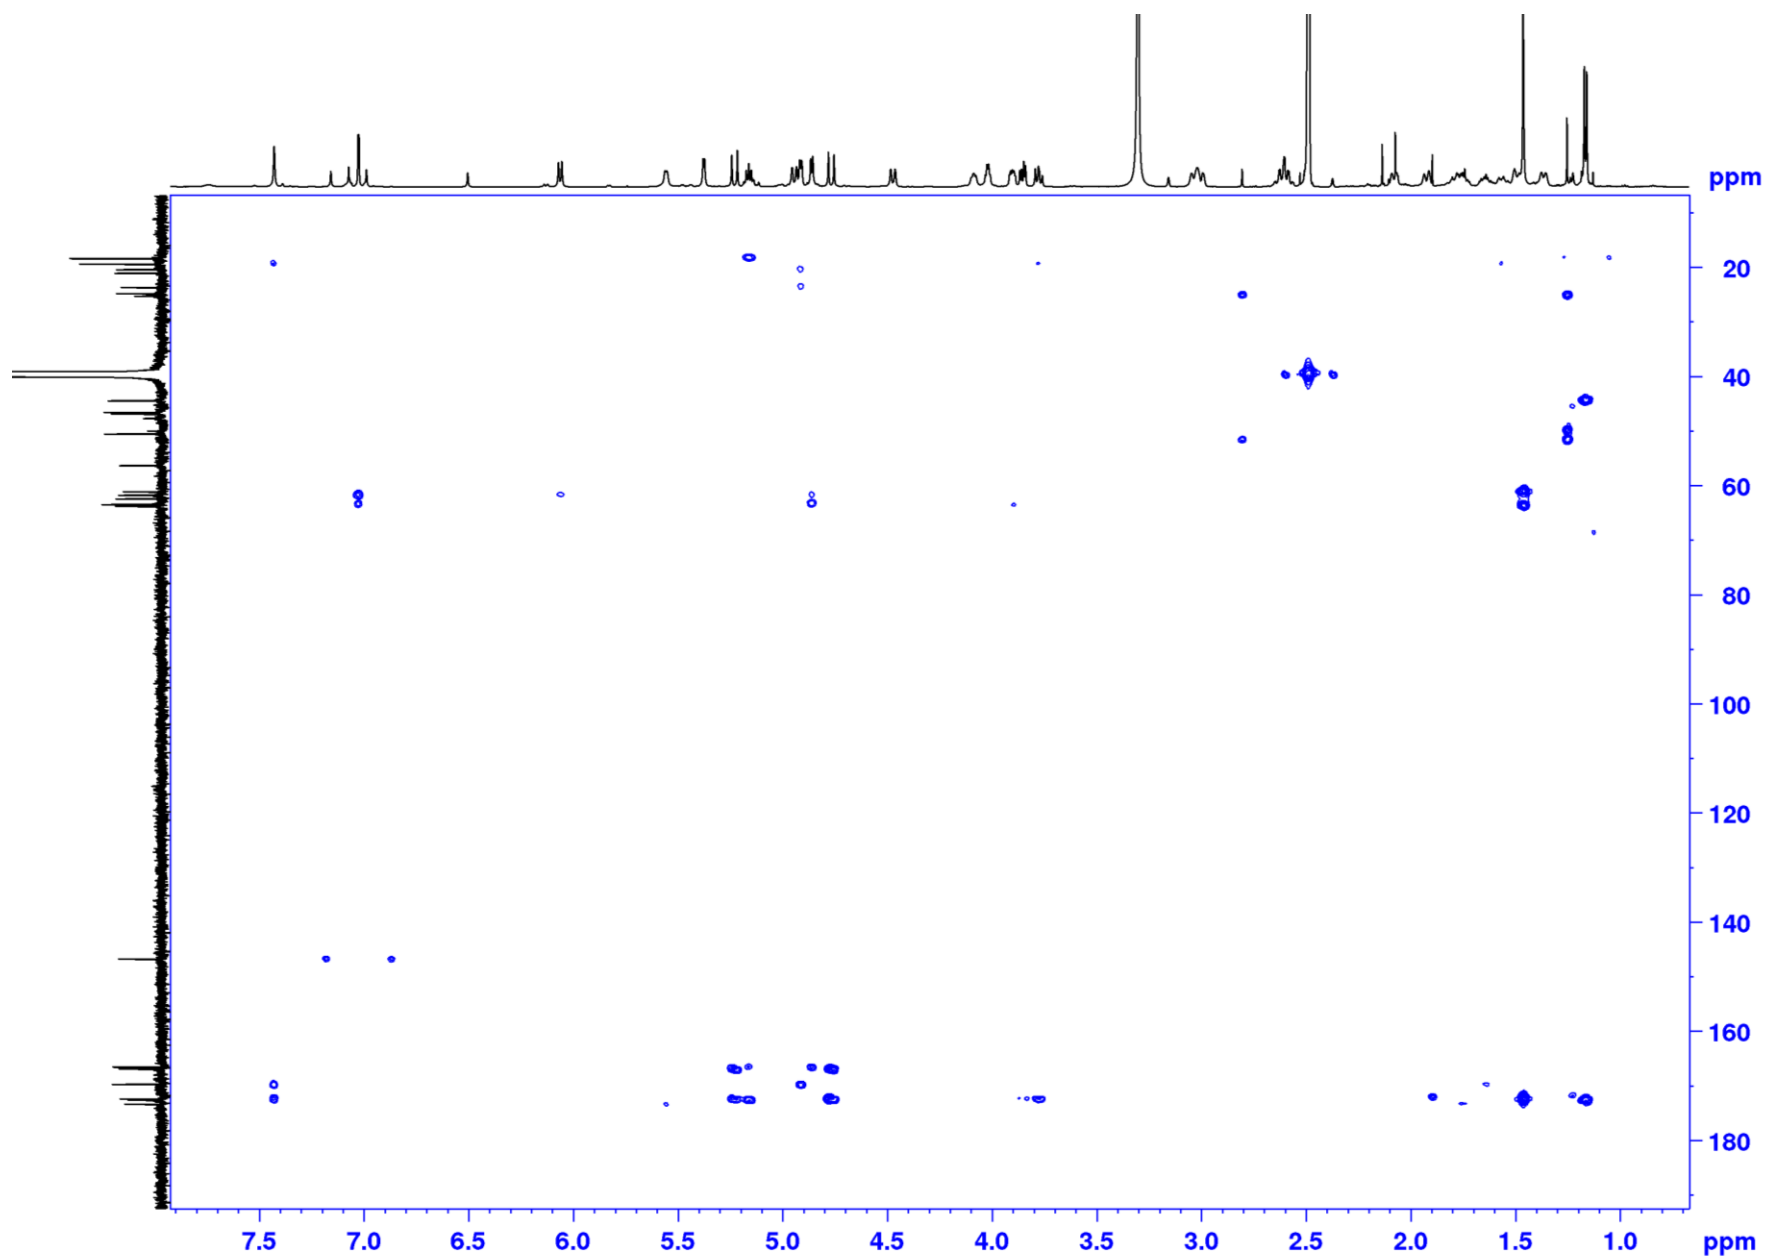

Figure S7.  $^1\text{H}$ - $^{13}\text{C}$  HMBC NMR spectrum (600 MHz,  $\text{DMSO-}d_6$ ) of deschlorosvetamycin A (**1**)

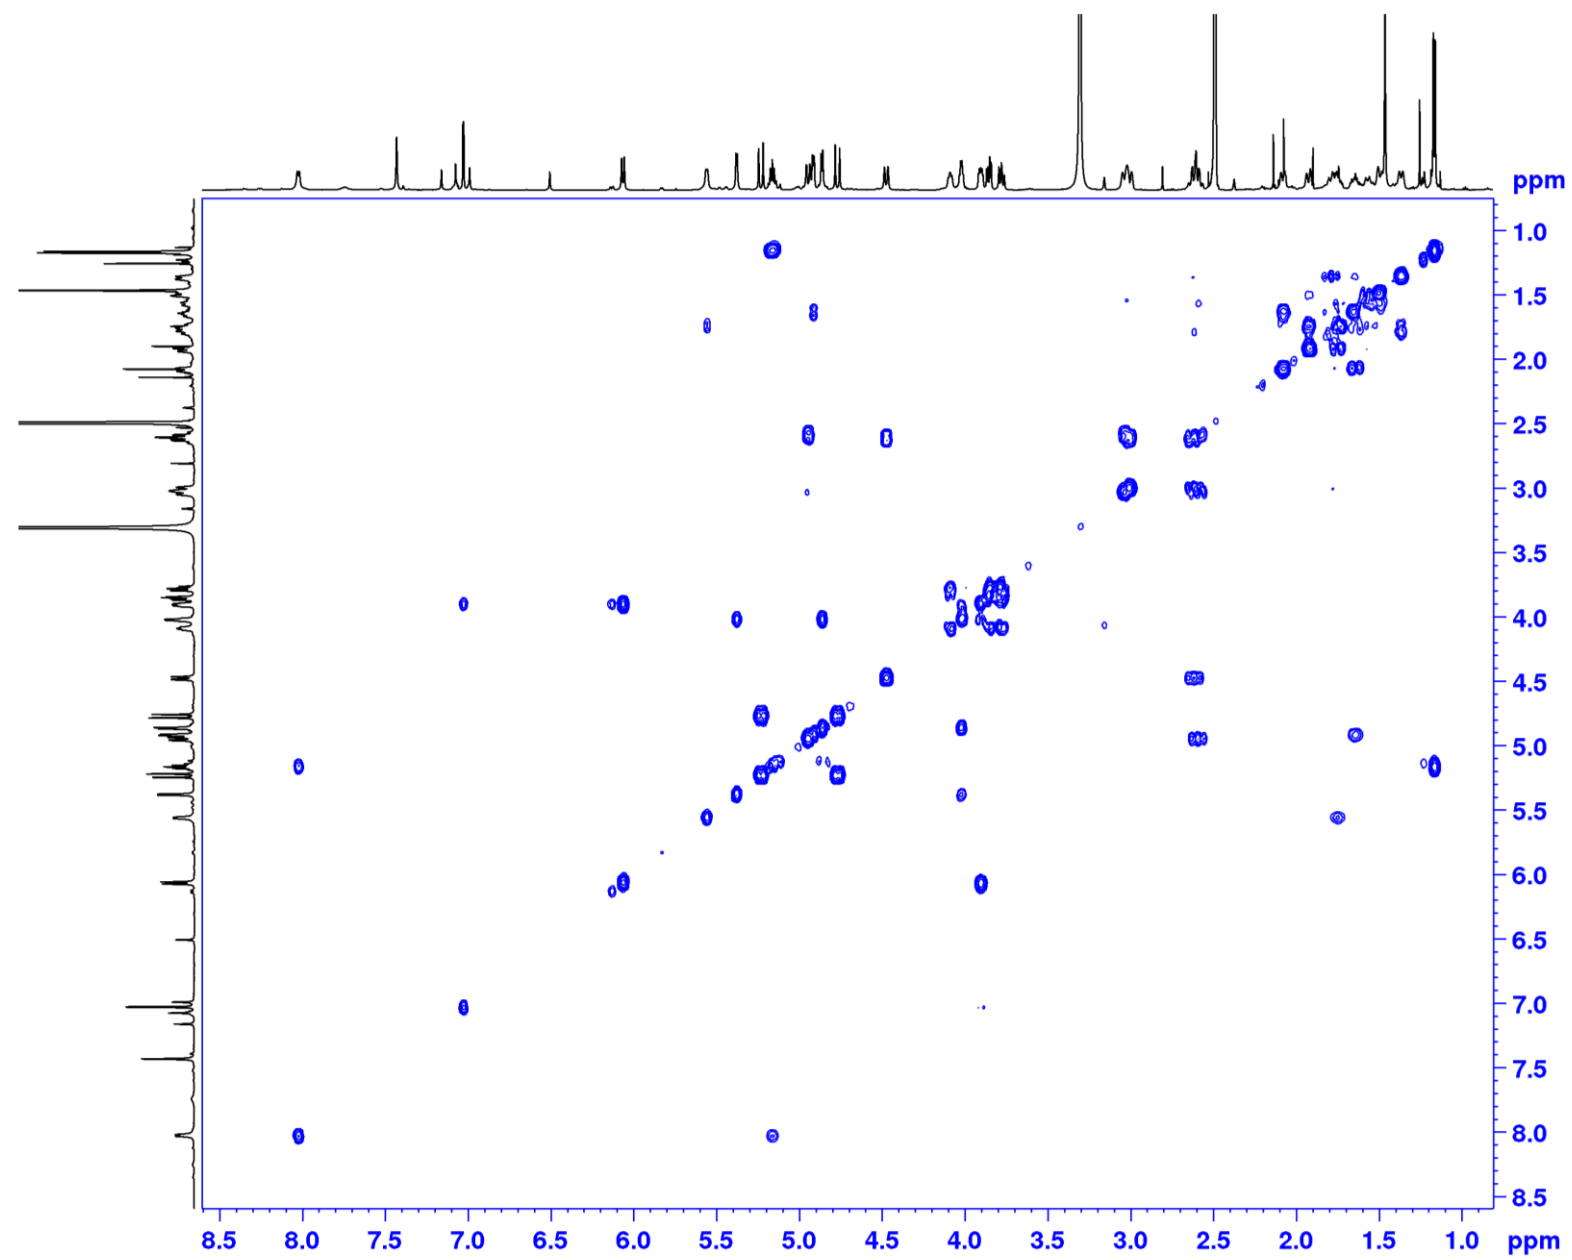

**Figure S8.**  $^1\text{H}$ - $^1\text{H}$  COSY NMR spectrum (600 MHz,  $\text{DMSO-}d_6$ ) of deschlorosvetamycin A (**1**)

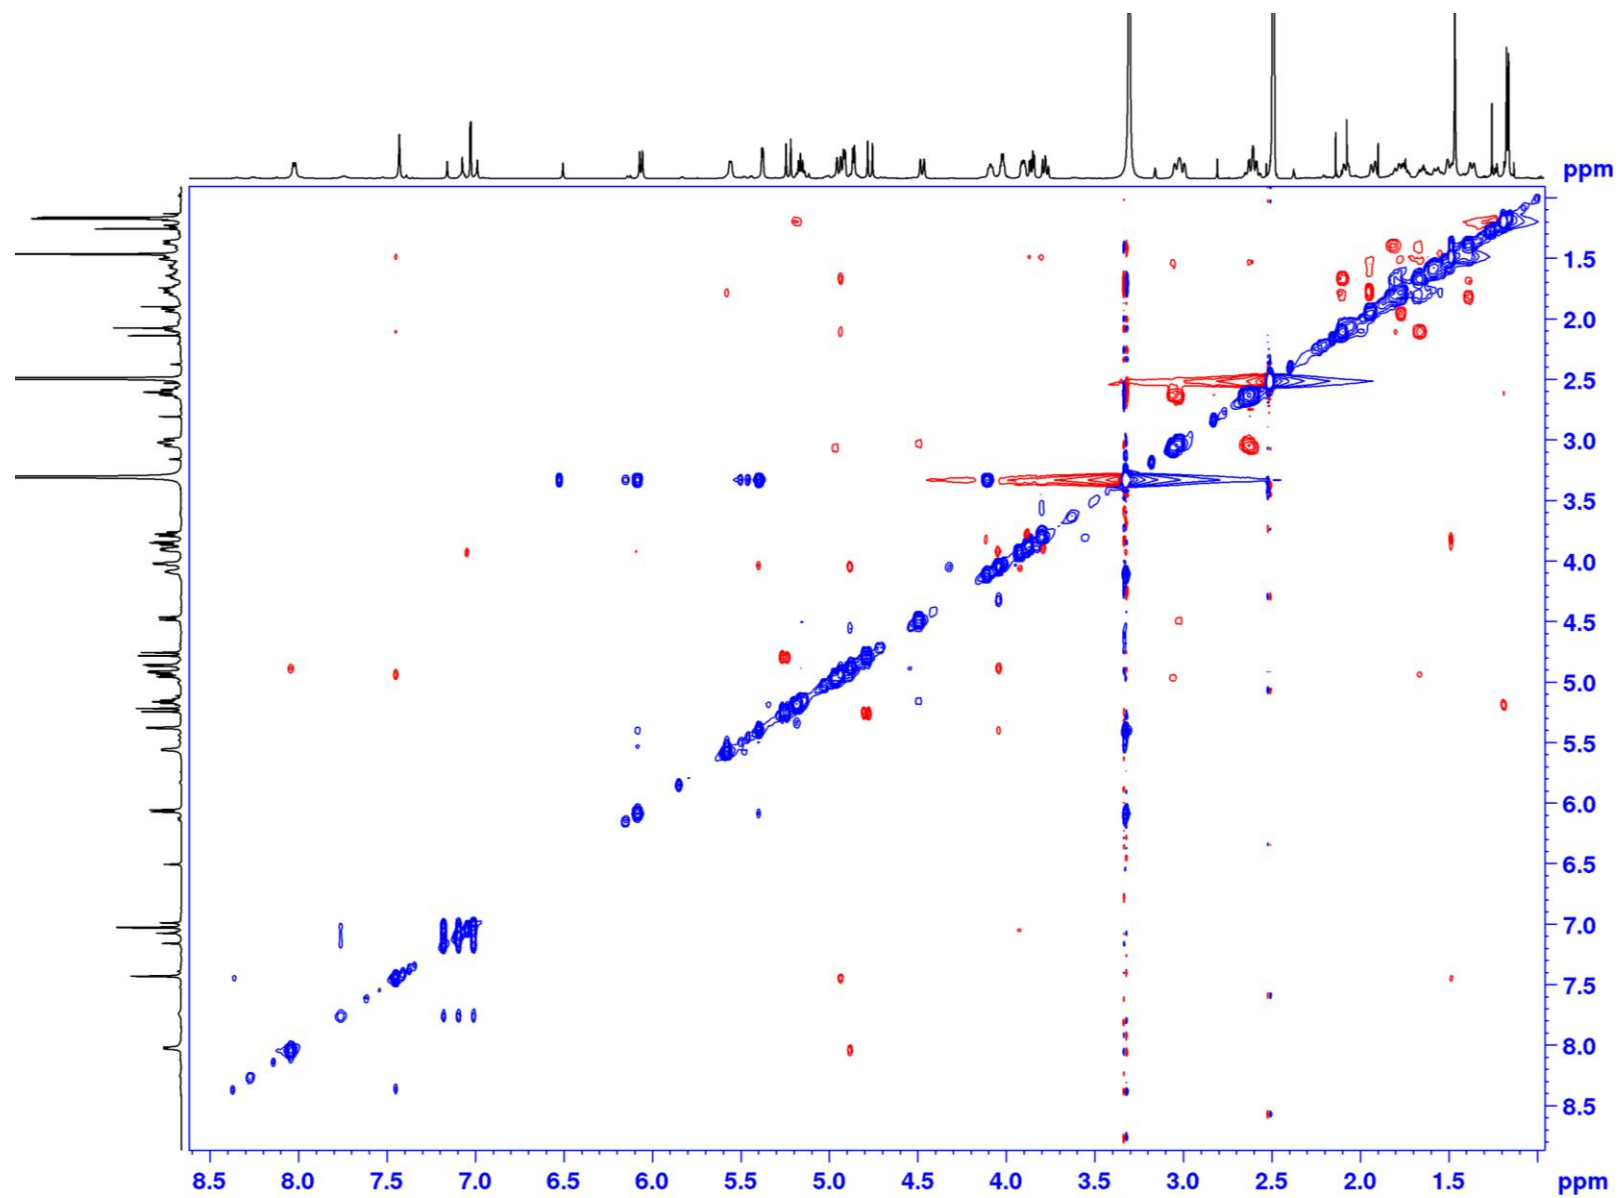

**Figure S9.** <sup>1</sup>H-<sup>1</sup>H ROESY NMR spectrum (600 MHz, DMSO-*d*<sub>6</sub>) of deschlorosvetamycin A (**1**)

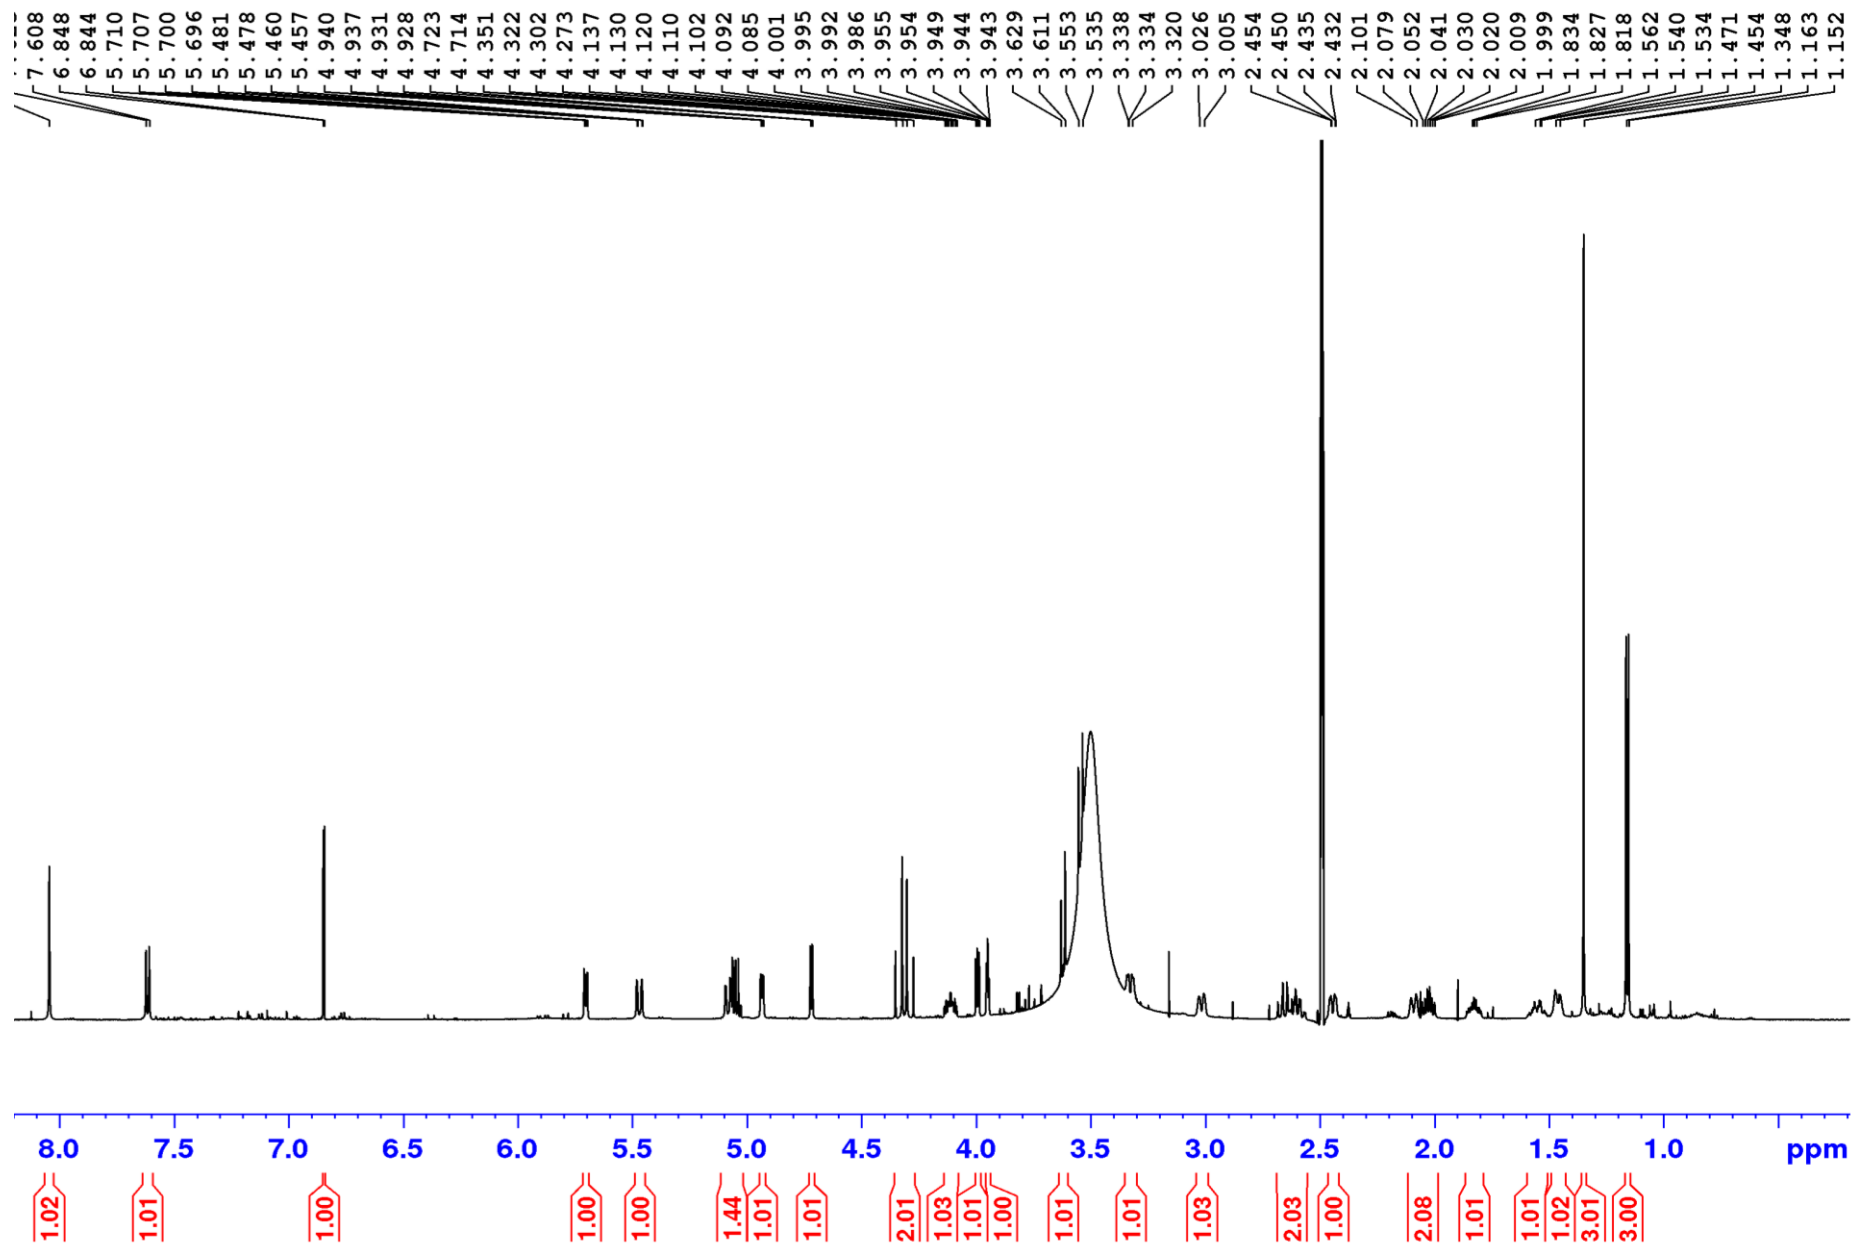

Figure S10.  $^1\text{H}$  NMR spectrum (600 MHz,  $\text{DMSO-}d_6$ ) of svetamycin H (2)

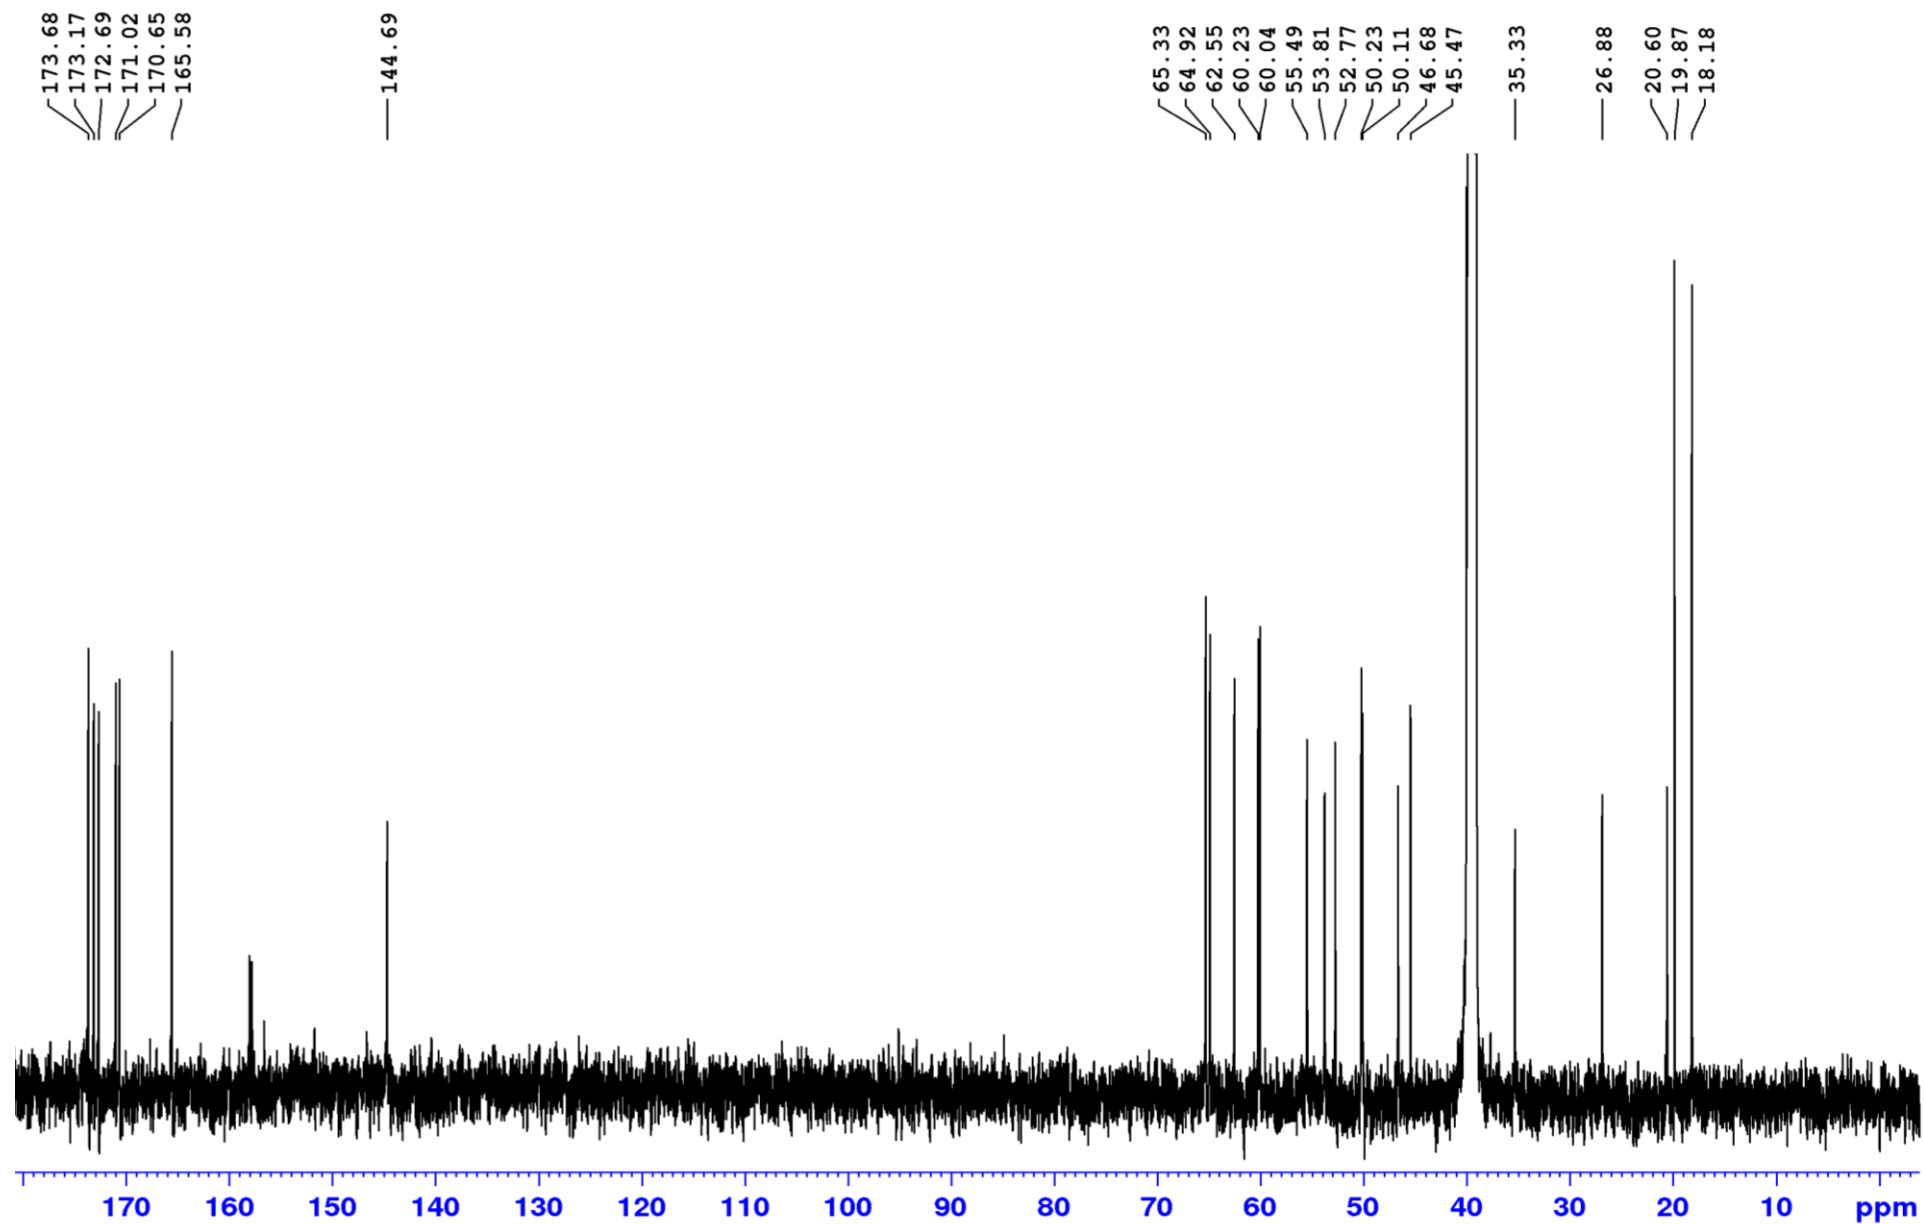

Figure S11.  $^{13}\text{C}$  NMR spectrum (150 MHz,  $\text{DMSO-}d_6$ ) of svetamycin H (2)

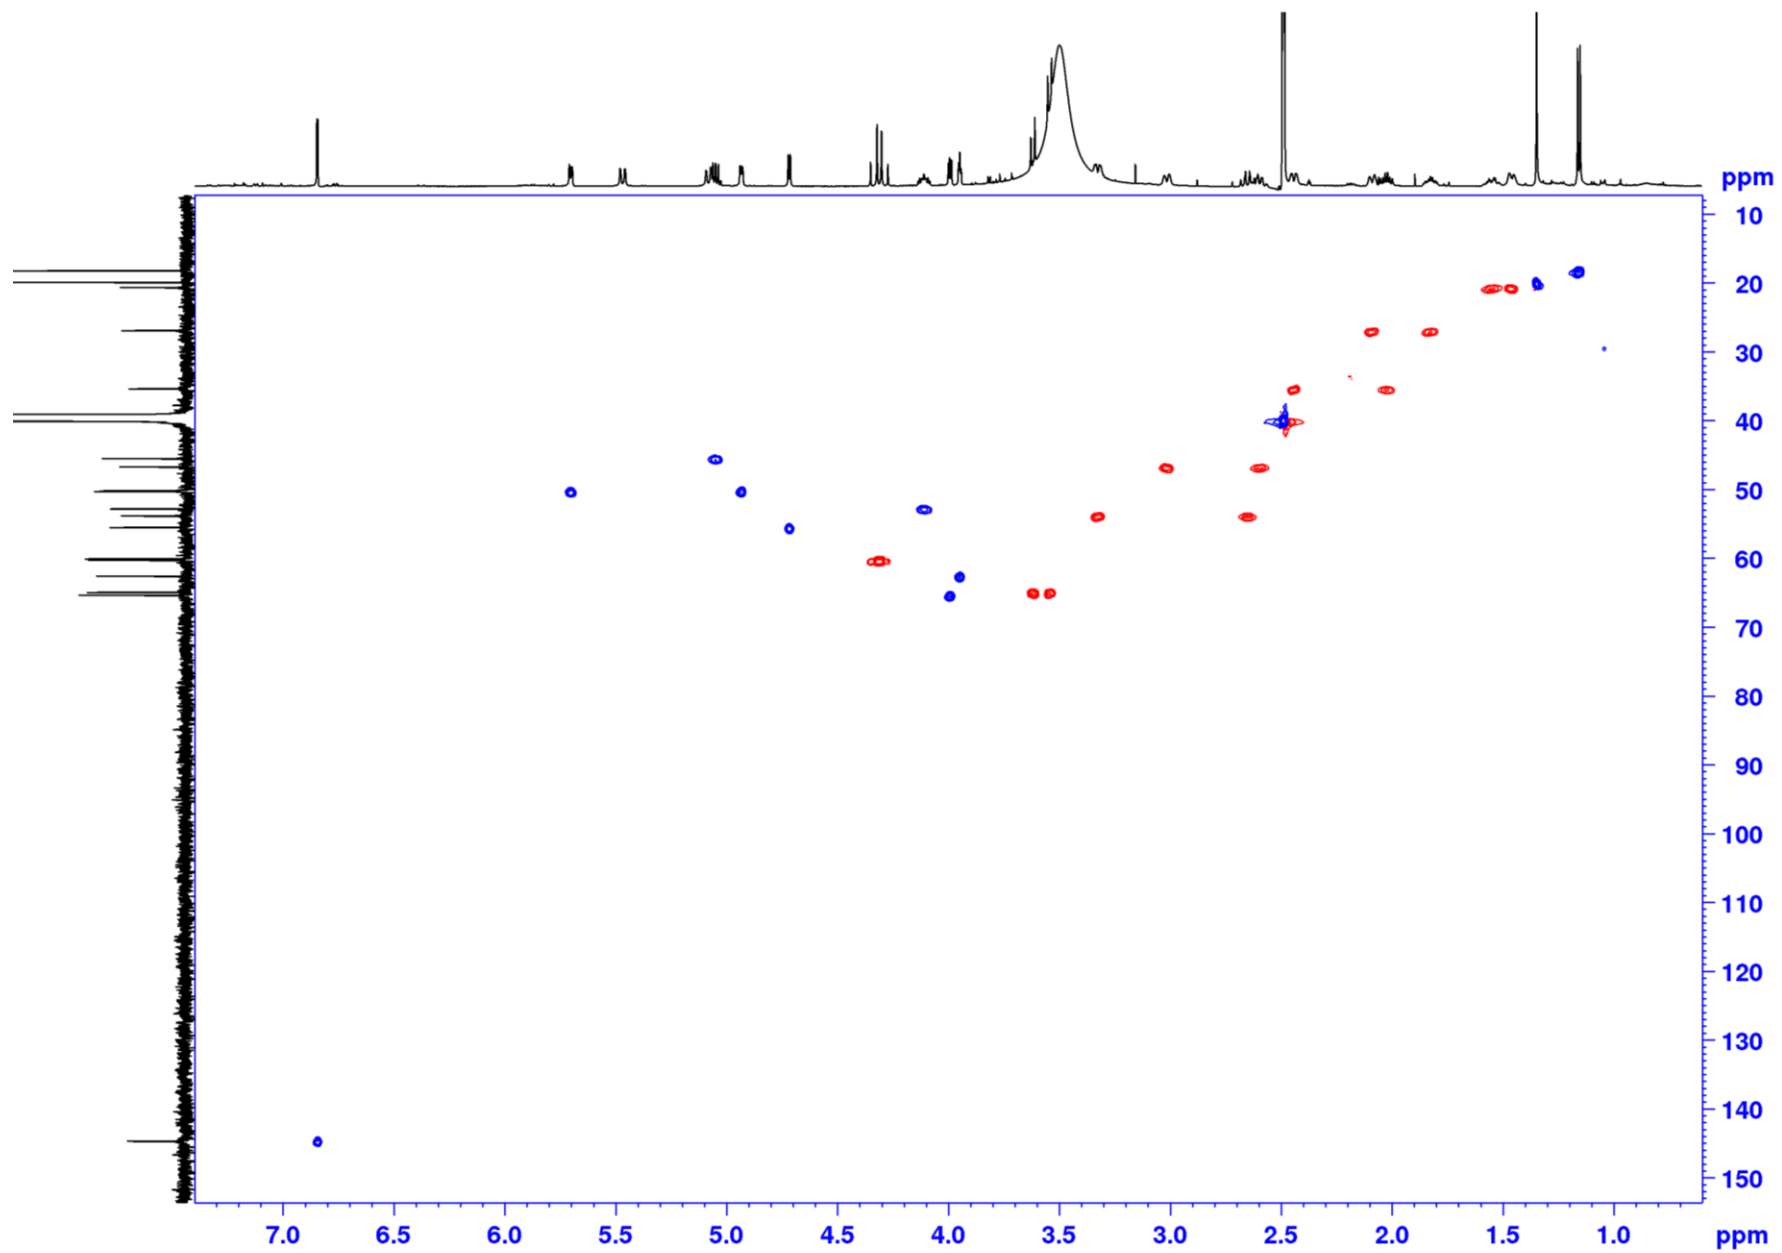

Figure S12.  $^1\text{H}$ - $^{13}\text{C}$  HSQC NMR spectrum (600 MHz,  $\text{DMSO-}d_6$ ) of svetamycin H (2)

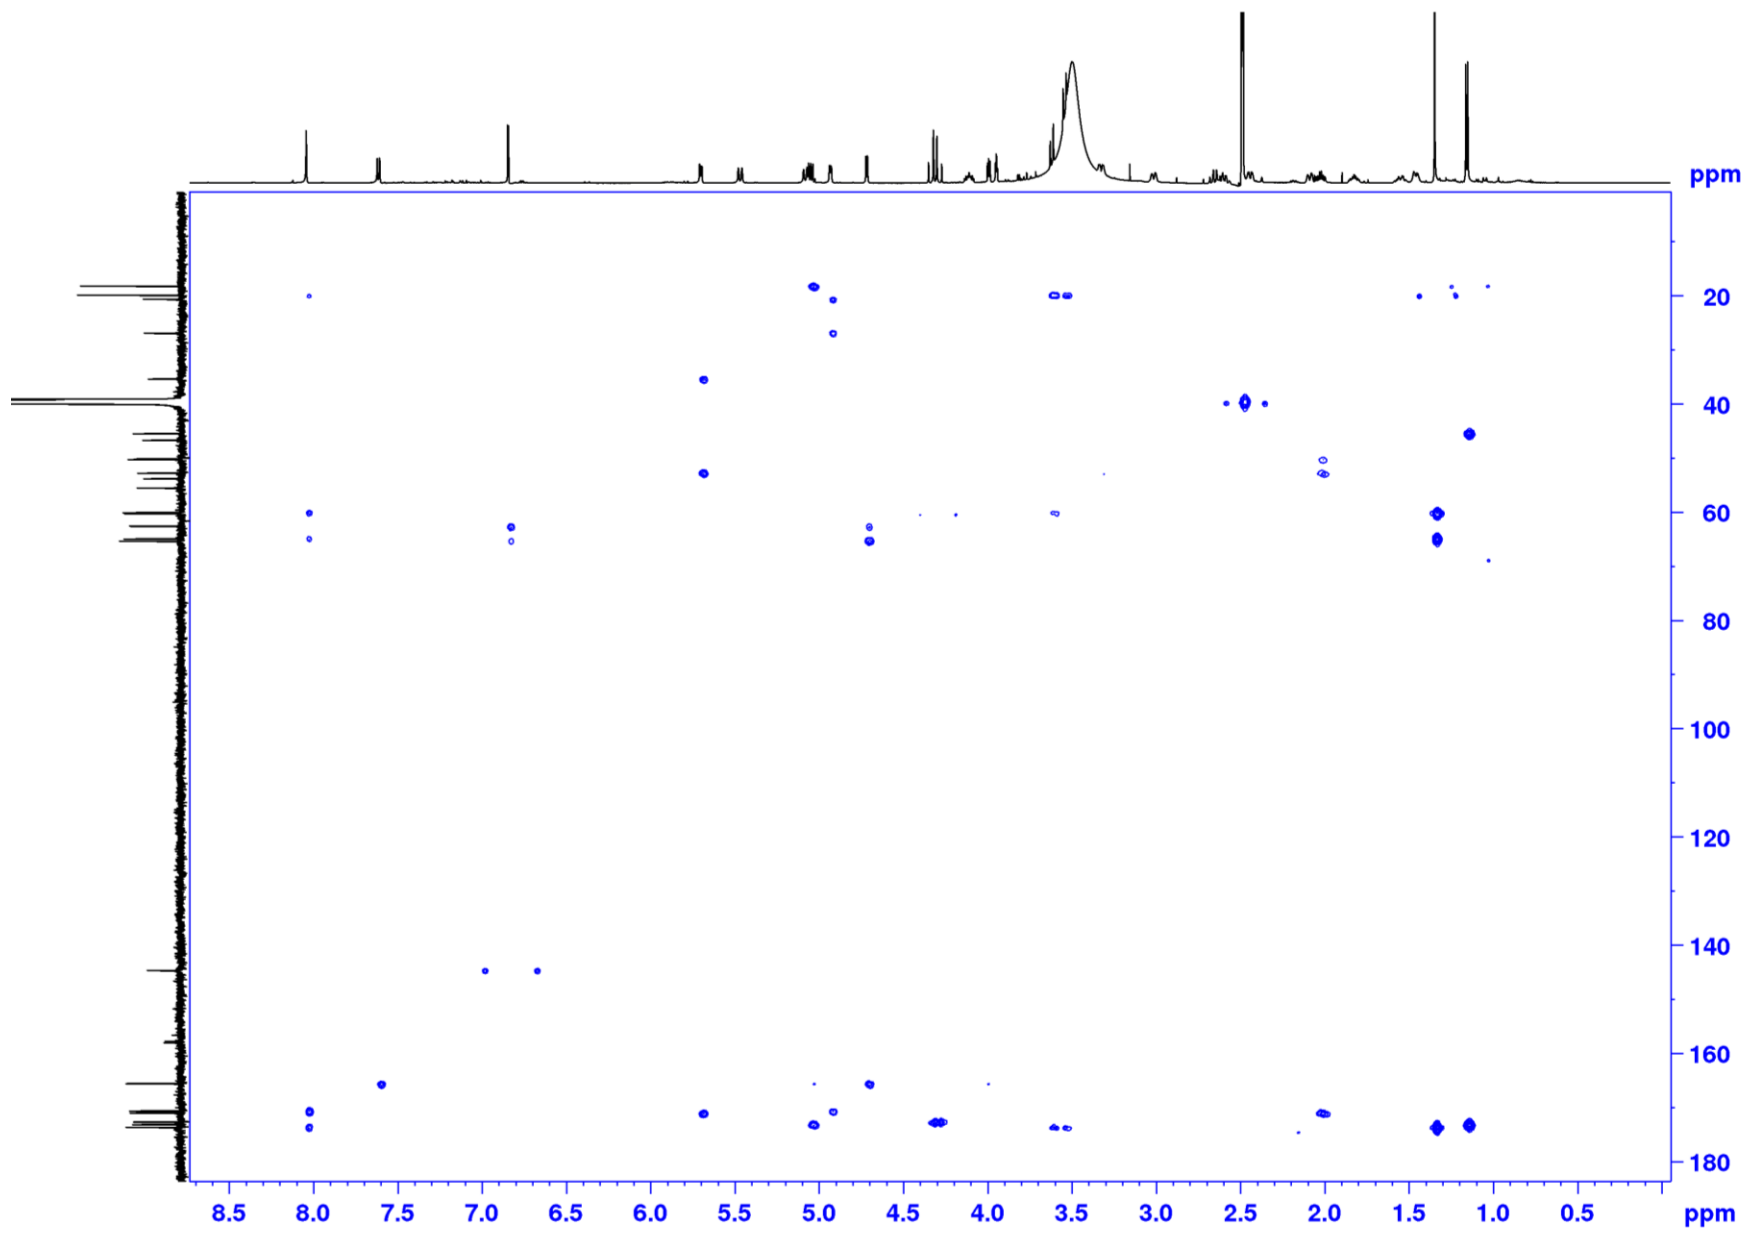

**Figure S13.**  $^1\text{H}$ - $^{13}\text{C}$  HMBC NMR spectrum (600 MHz,  $\text{DMSO-}d_6$ ) of svetamycin H (2)



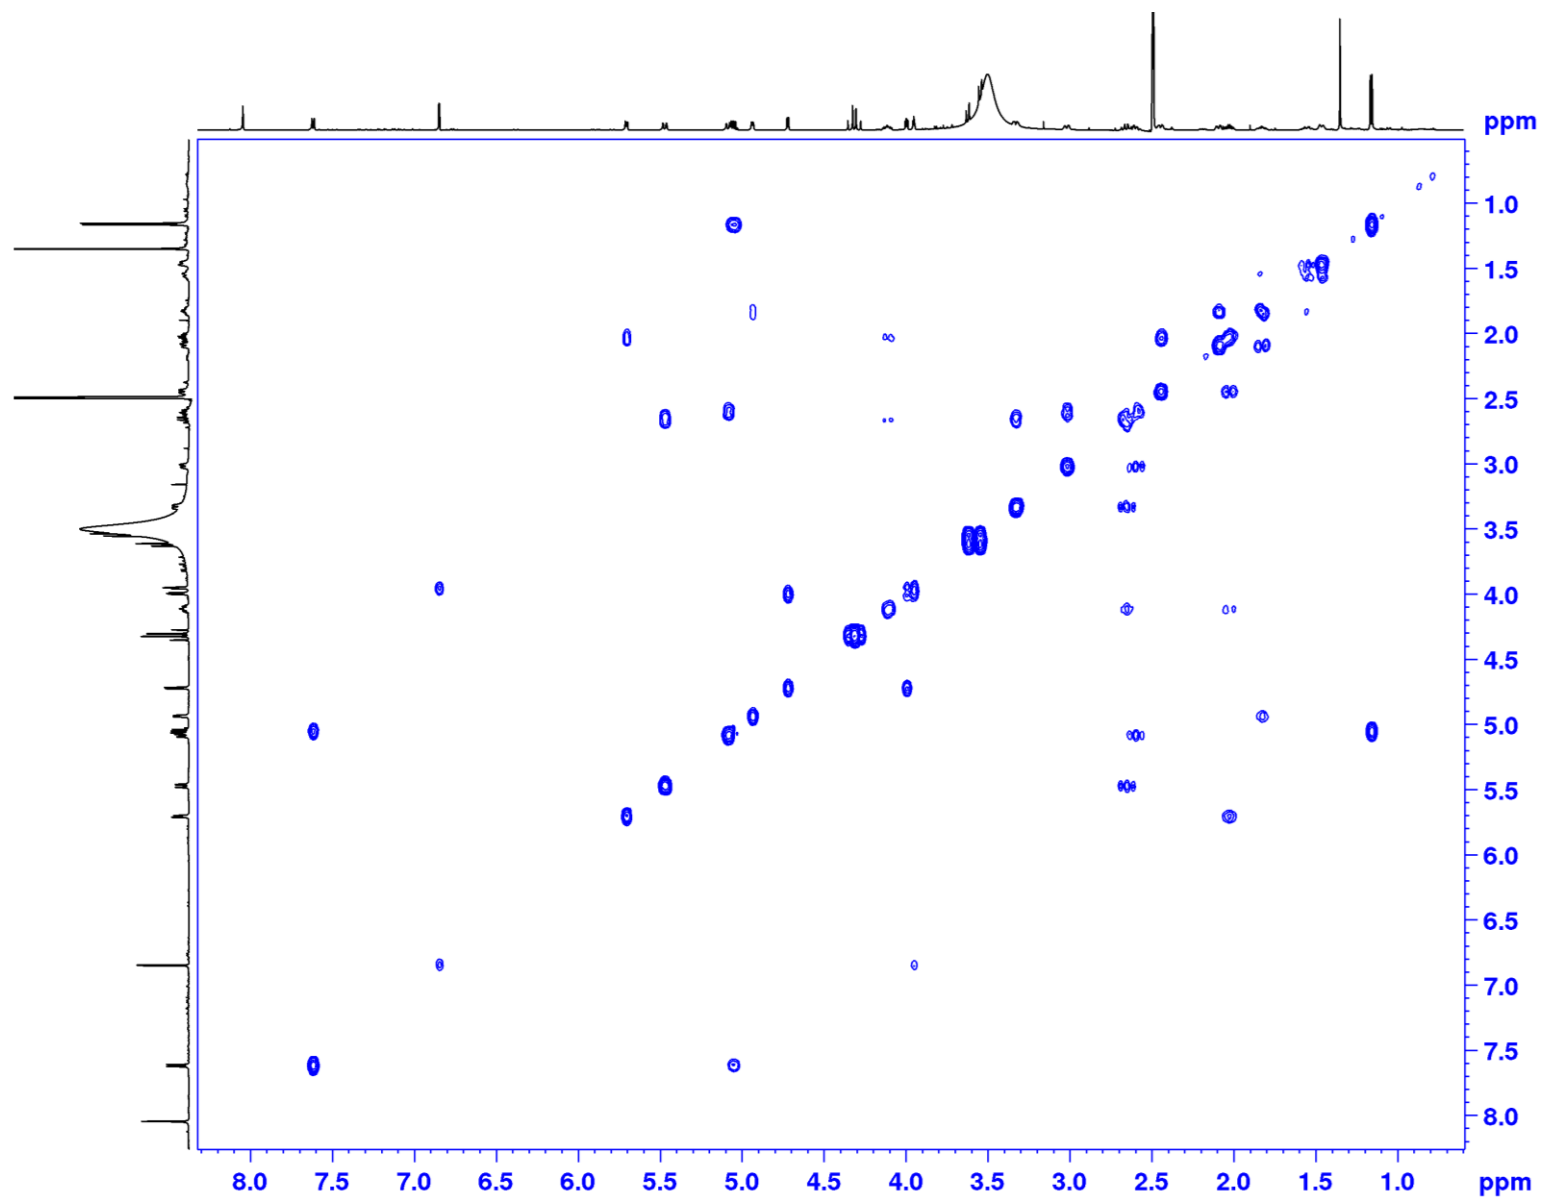

**Figure S14.**  $^1\text{H}$ - $^1\text{H}$  COSY NMR spectrum (600 MHz,  $\text{DMSO-}d_6$ ) of svetamycin H (2)

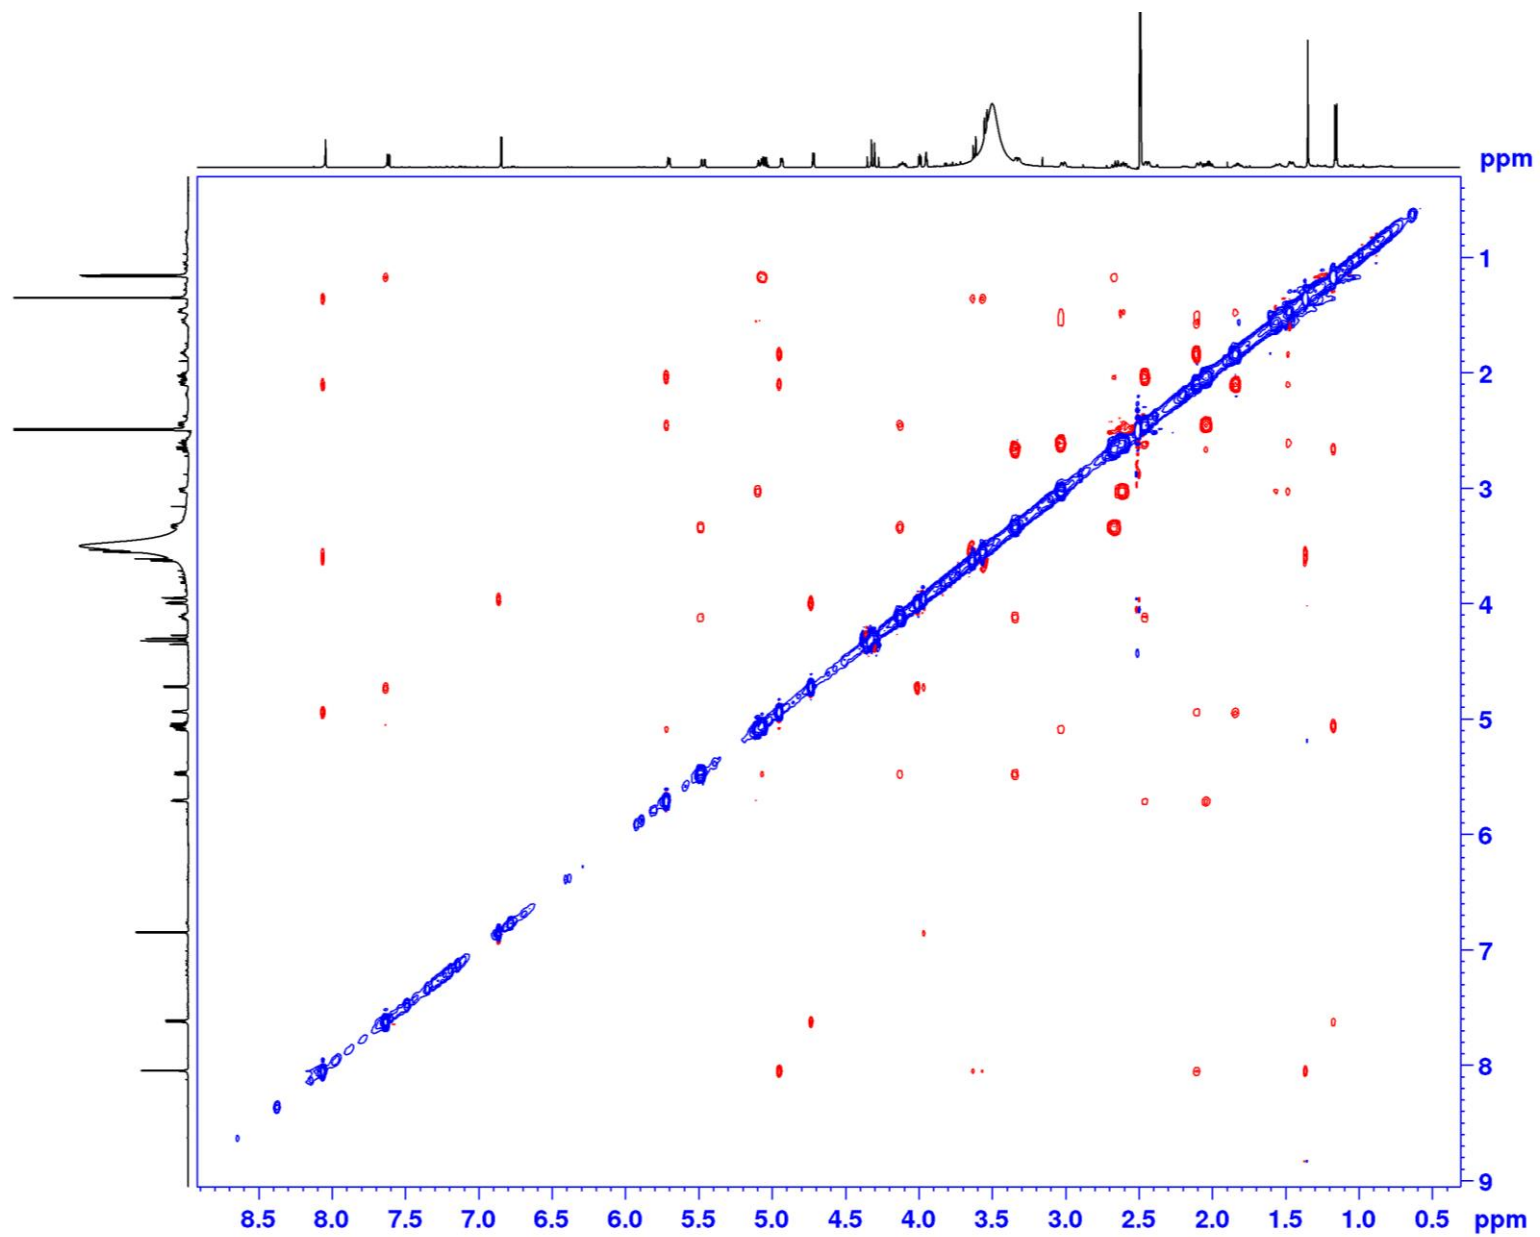

**Figure S15.**  $^1\text{H}$ - $^1\text{H}$  ROESY NMR spectrum (600 MHz,  $\text{DMSO-}d_6$ ) of svetamycin H (2)

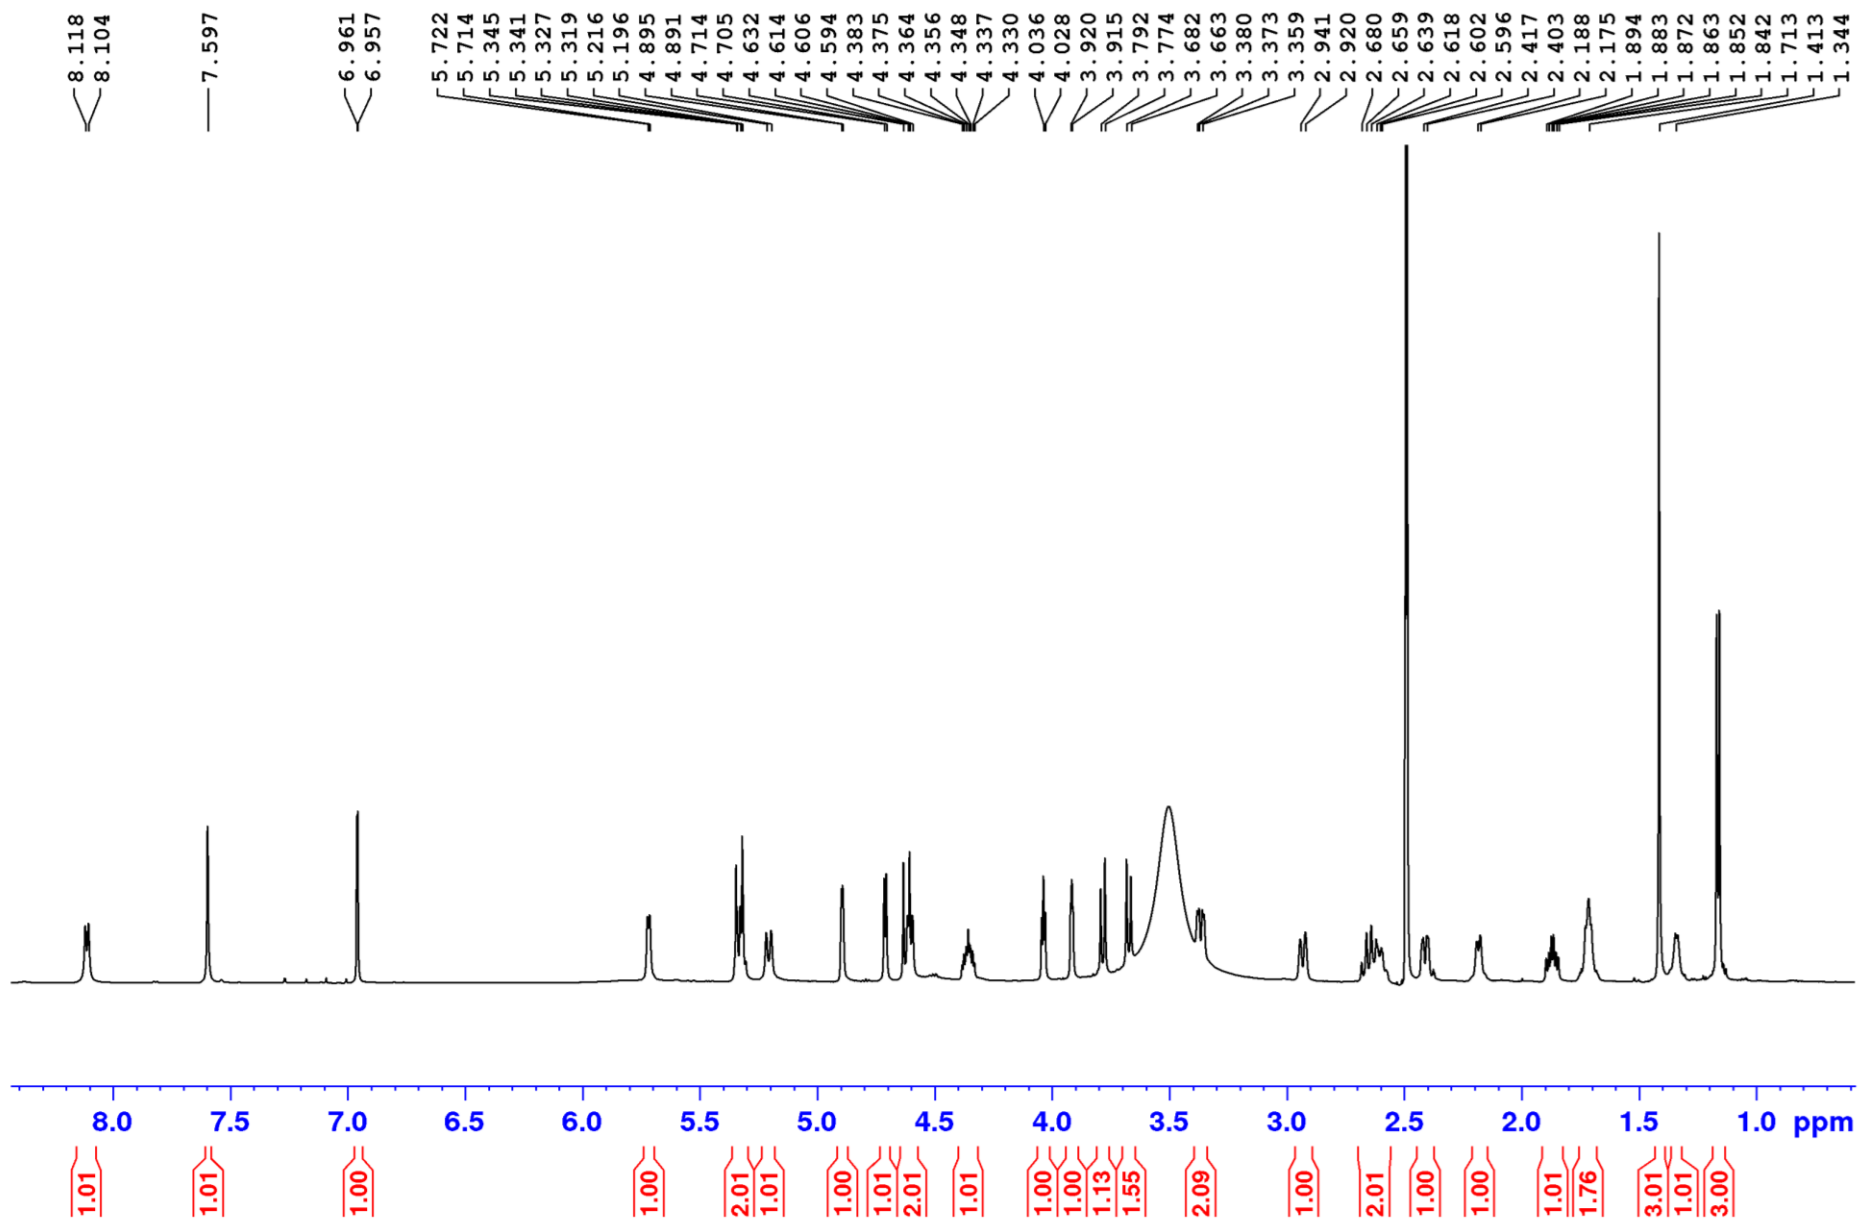

Figure S16.  $^1\text{H}$  NMR spectrum (600 MHz,  $\text{DMSO-}d_6$ ) of svetamycin A (3)

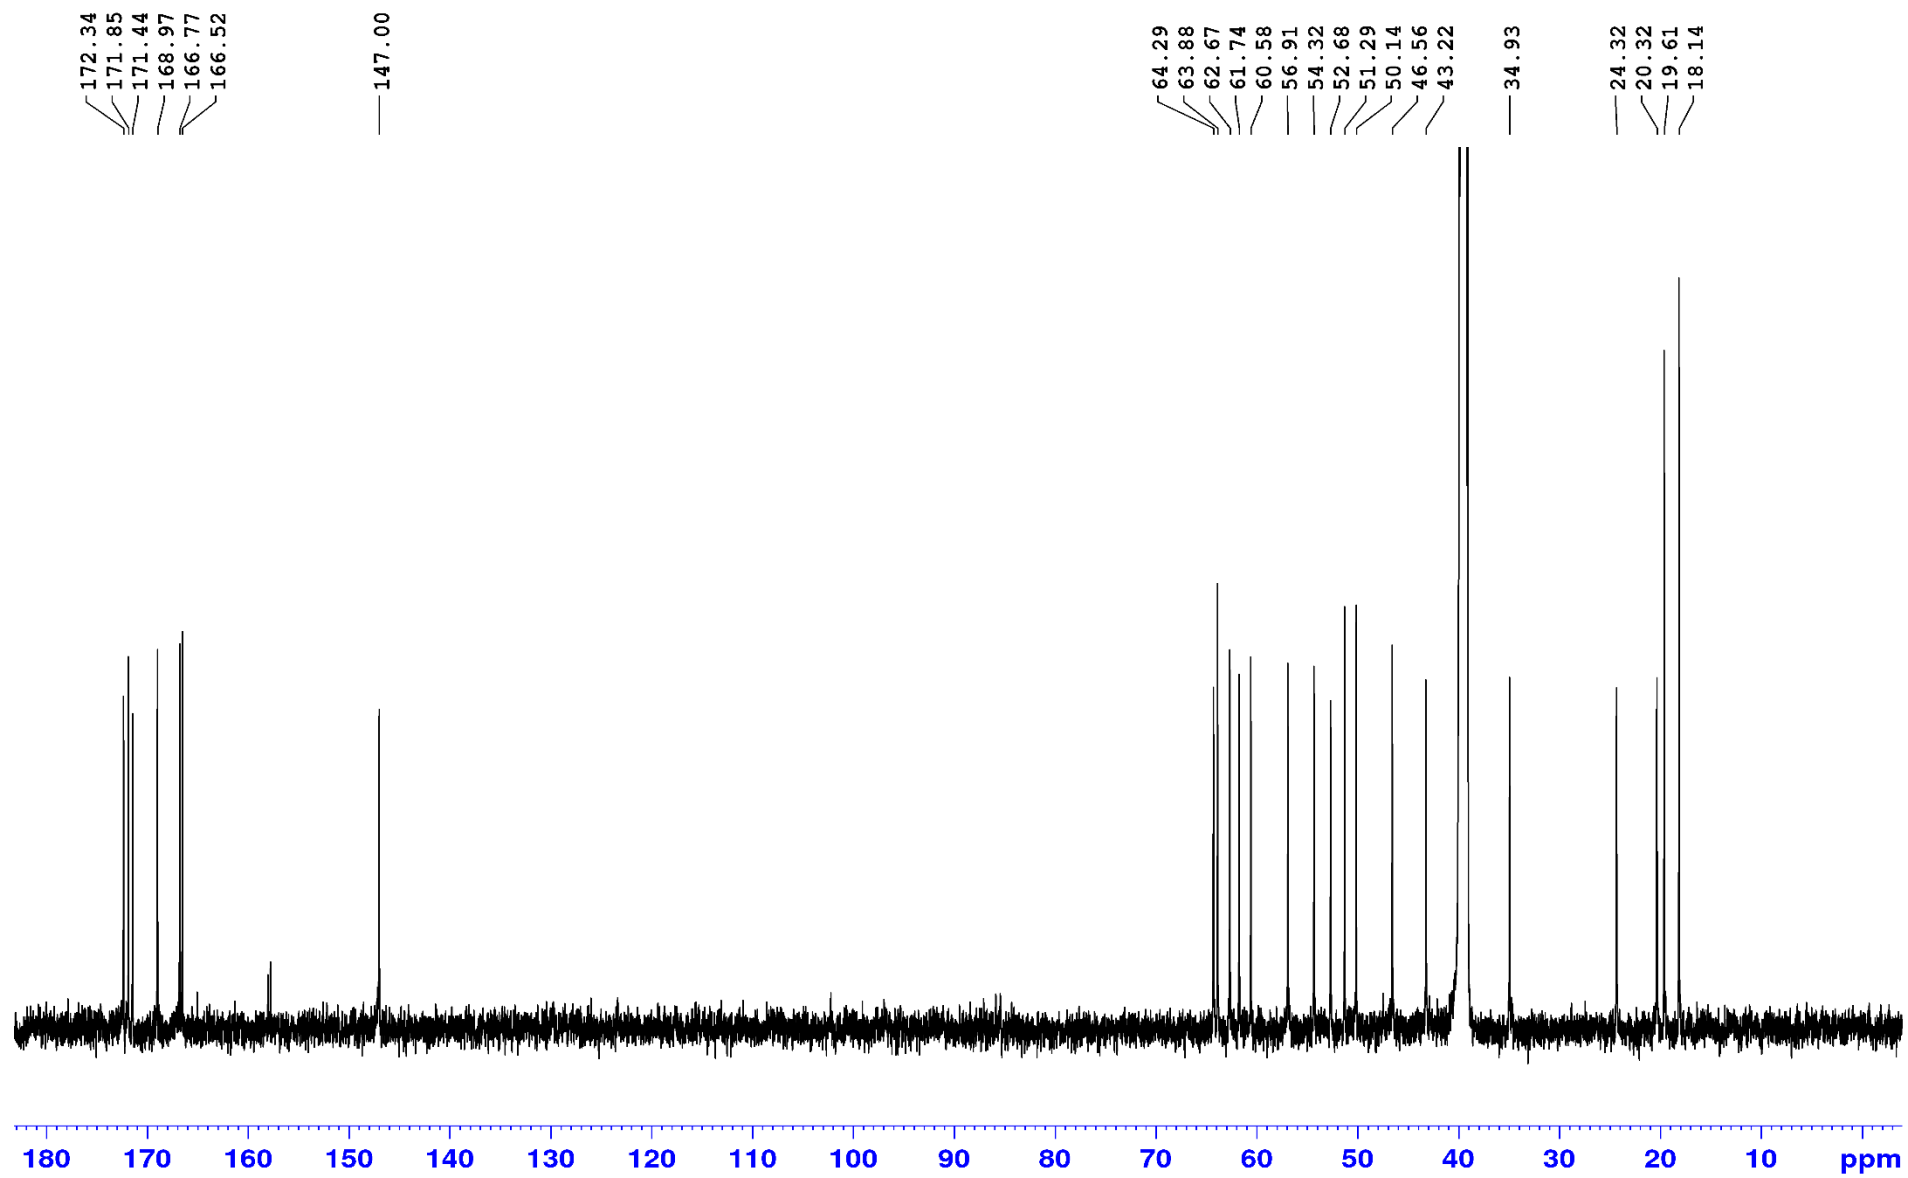

Figure S17.  $^{13}\text{C}$  NMR spectrum (150 MHz,  $\text{DMSO-}d_6$ ) of svetamycin A (**3**)

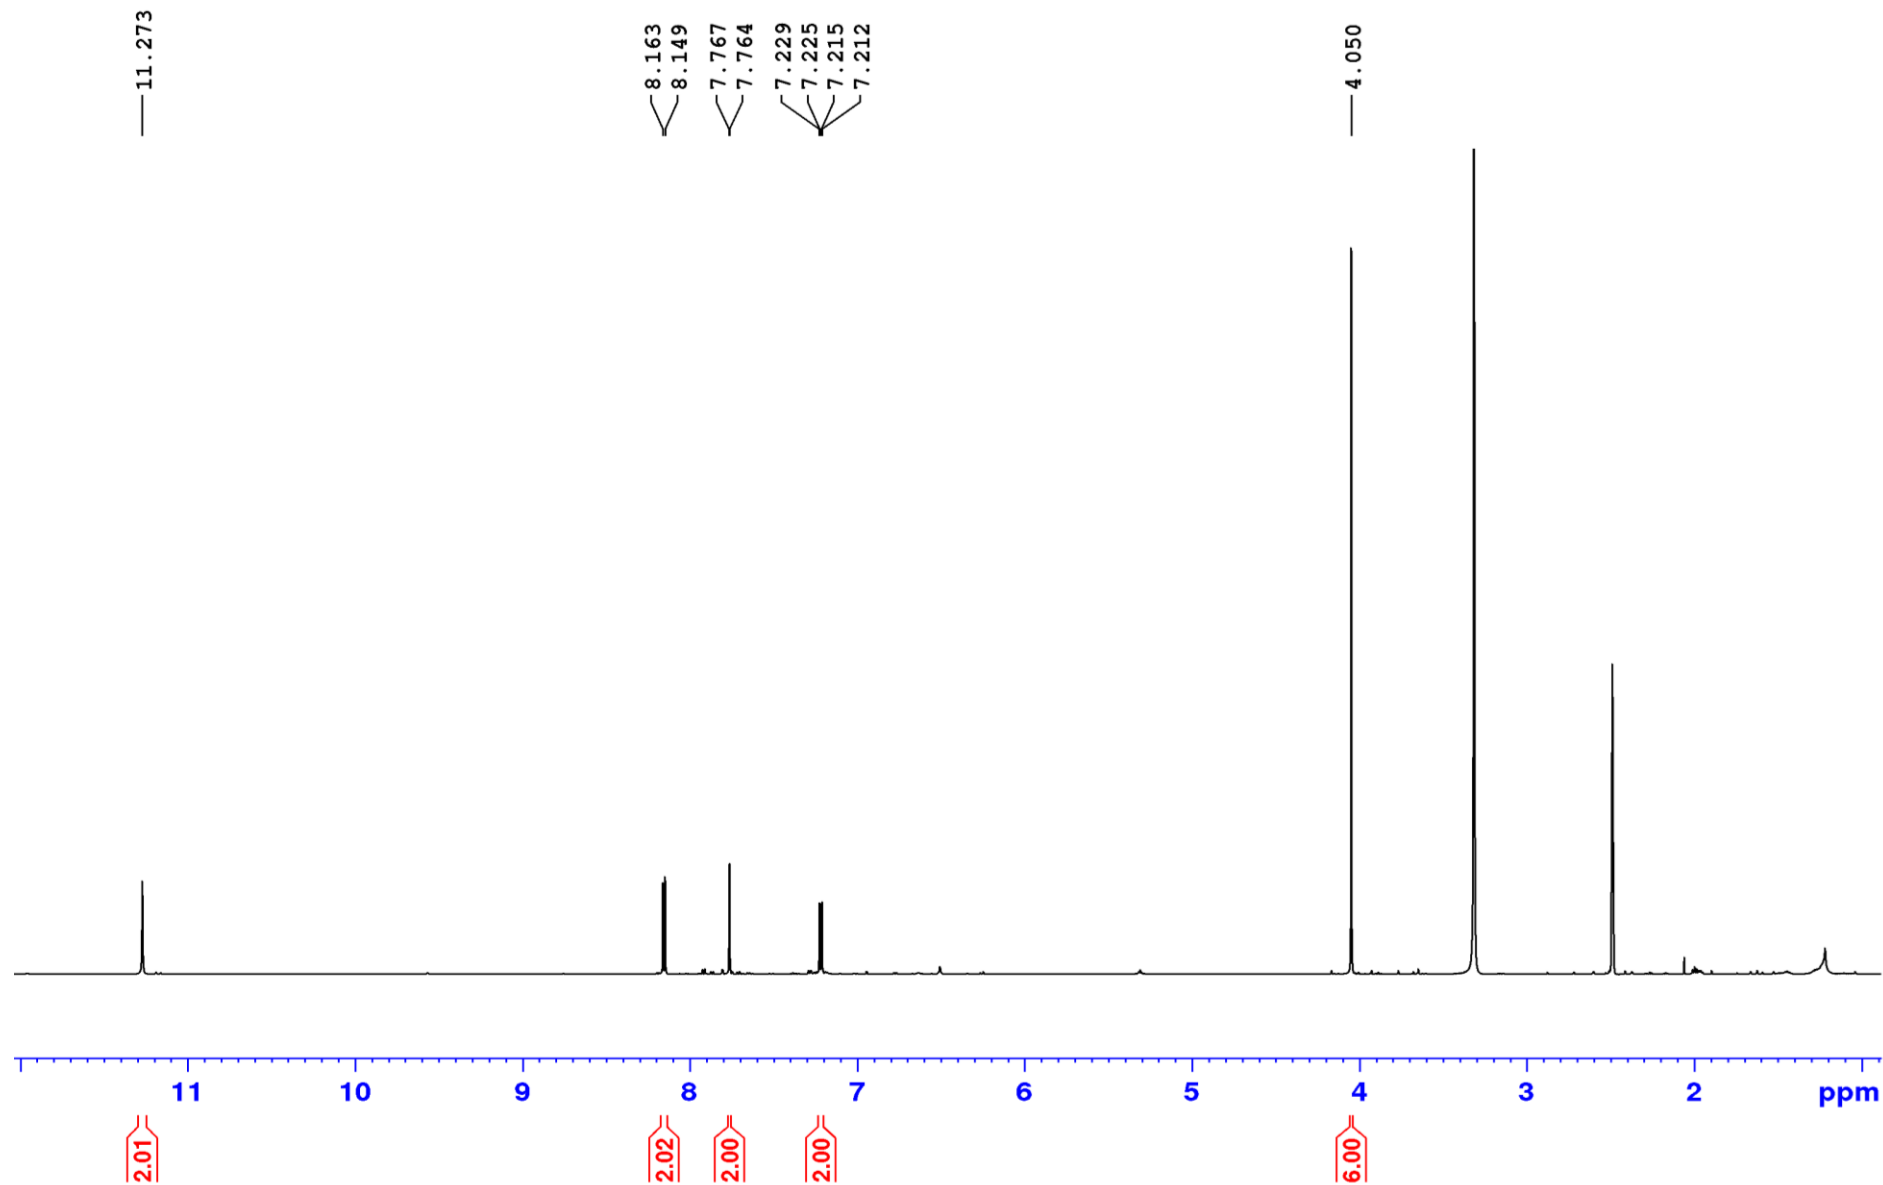

Figure S18.  $^1\text{H}$  NMR spectrum (600 MHz,  $\text{DMSO-}d_6$ ) of borregomycin E (**4**)

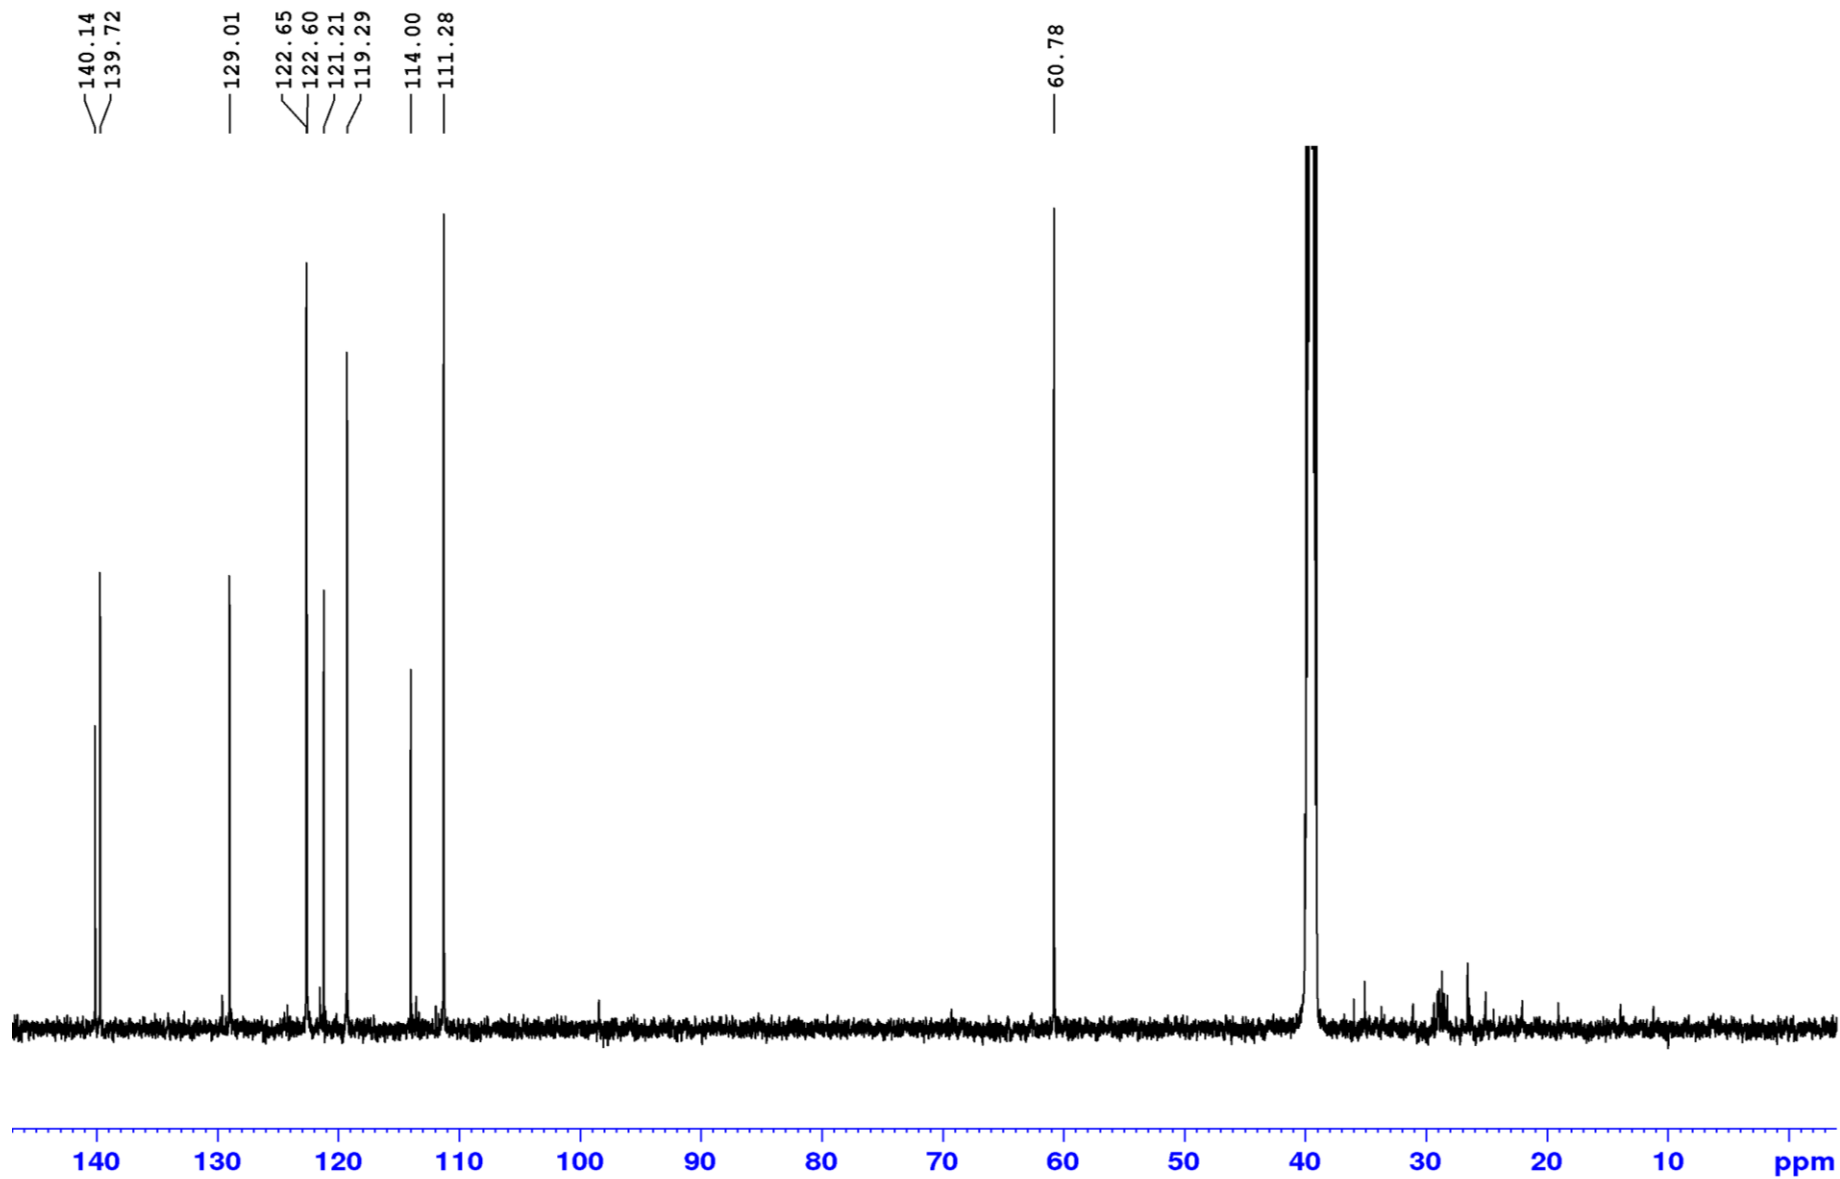

Figure S19.  $^{13}\text{C}$  NMR spectrum (150 MHz,  $\text{DMSO-}d_6$ ) of borregomycin E (4)

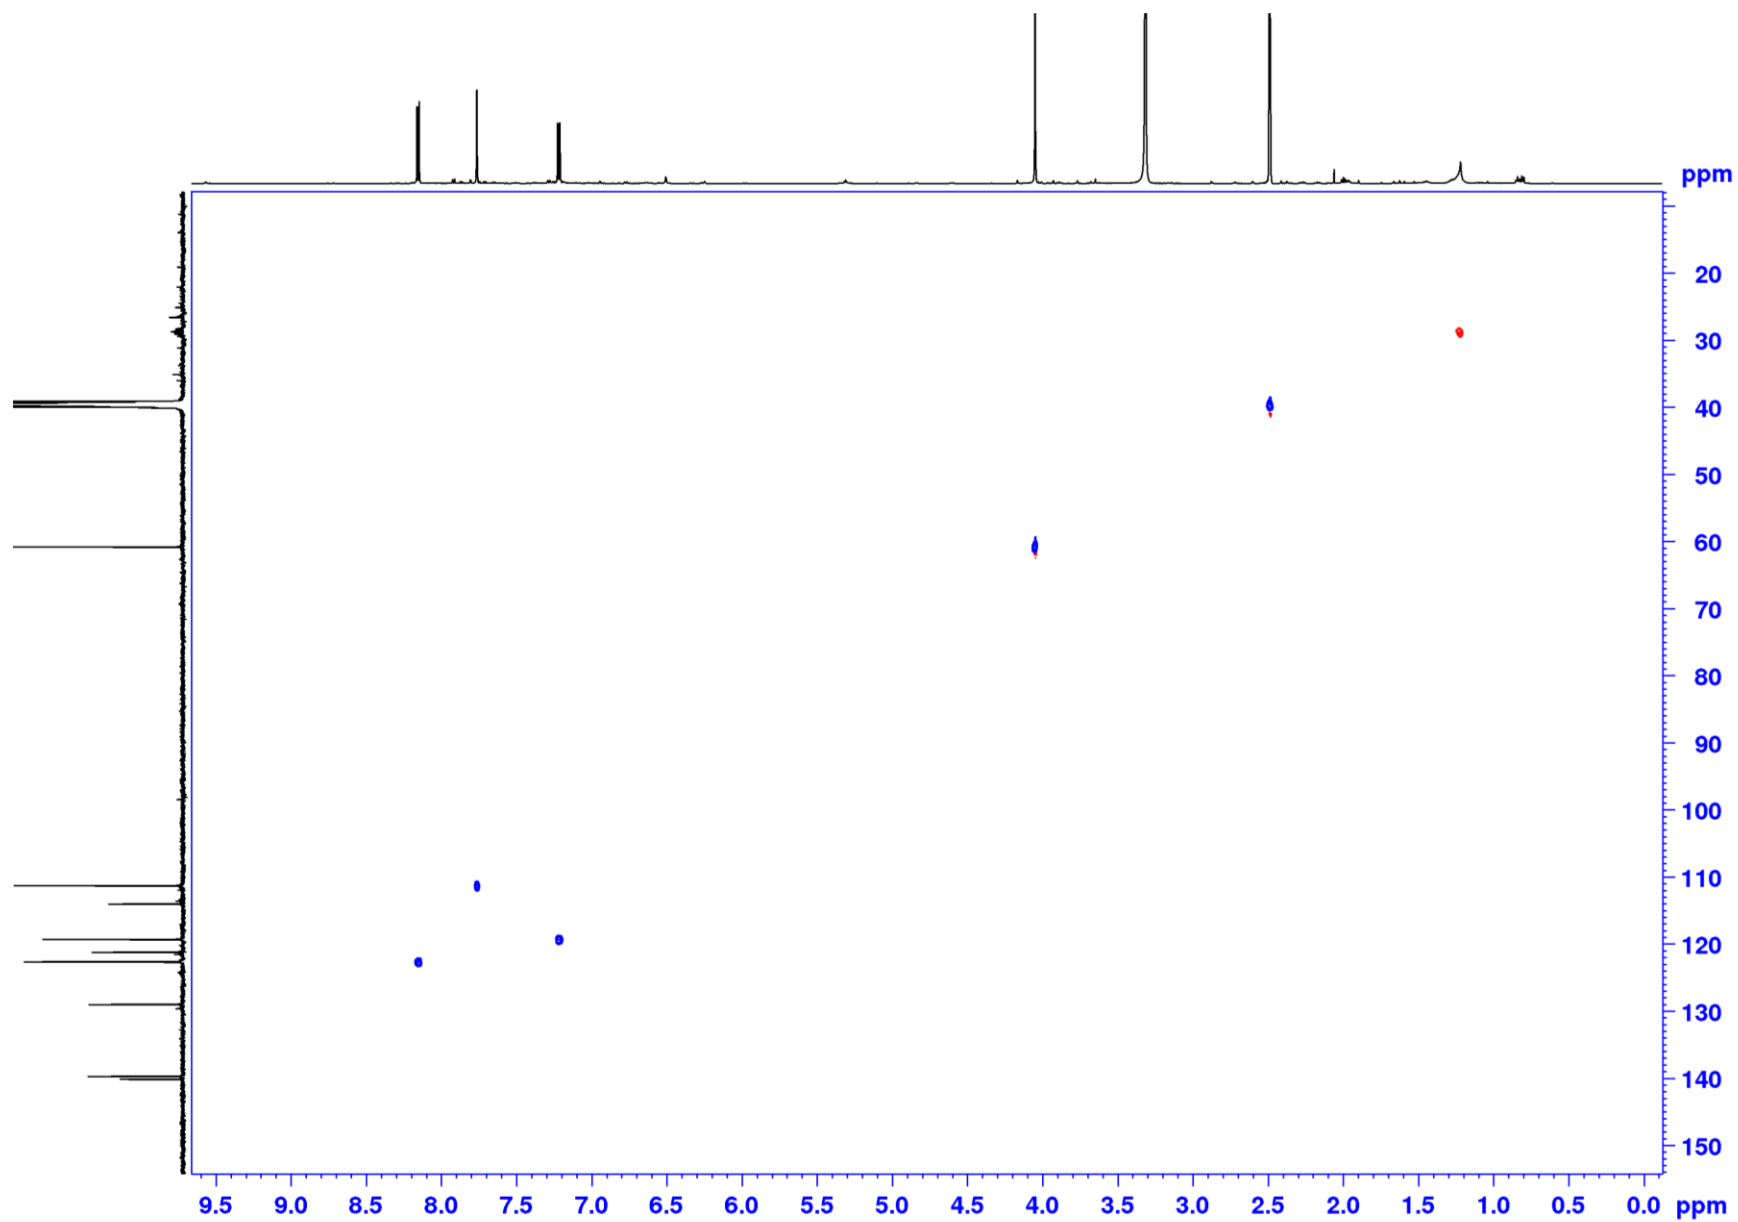

**Figure S20.**  $^1\text{H}$ - $^{13}\text{C}$  HSQC NMR spectrum (600 MHz,  $\text{DMSO-}d_6$ ) of borregomycin E (**4**)

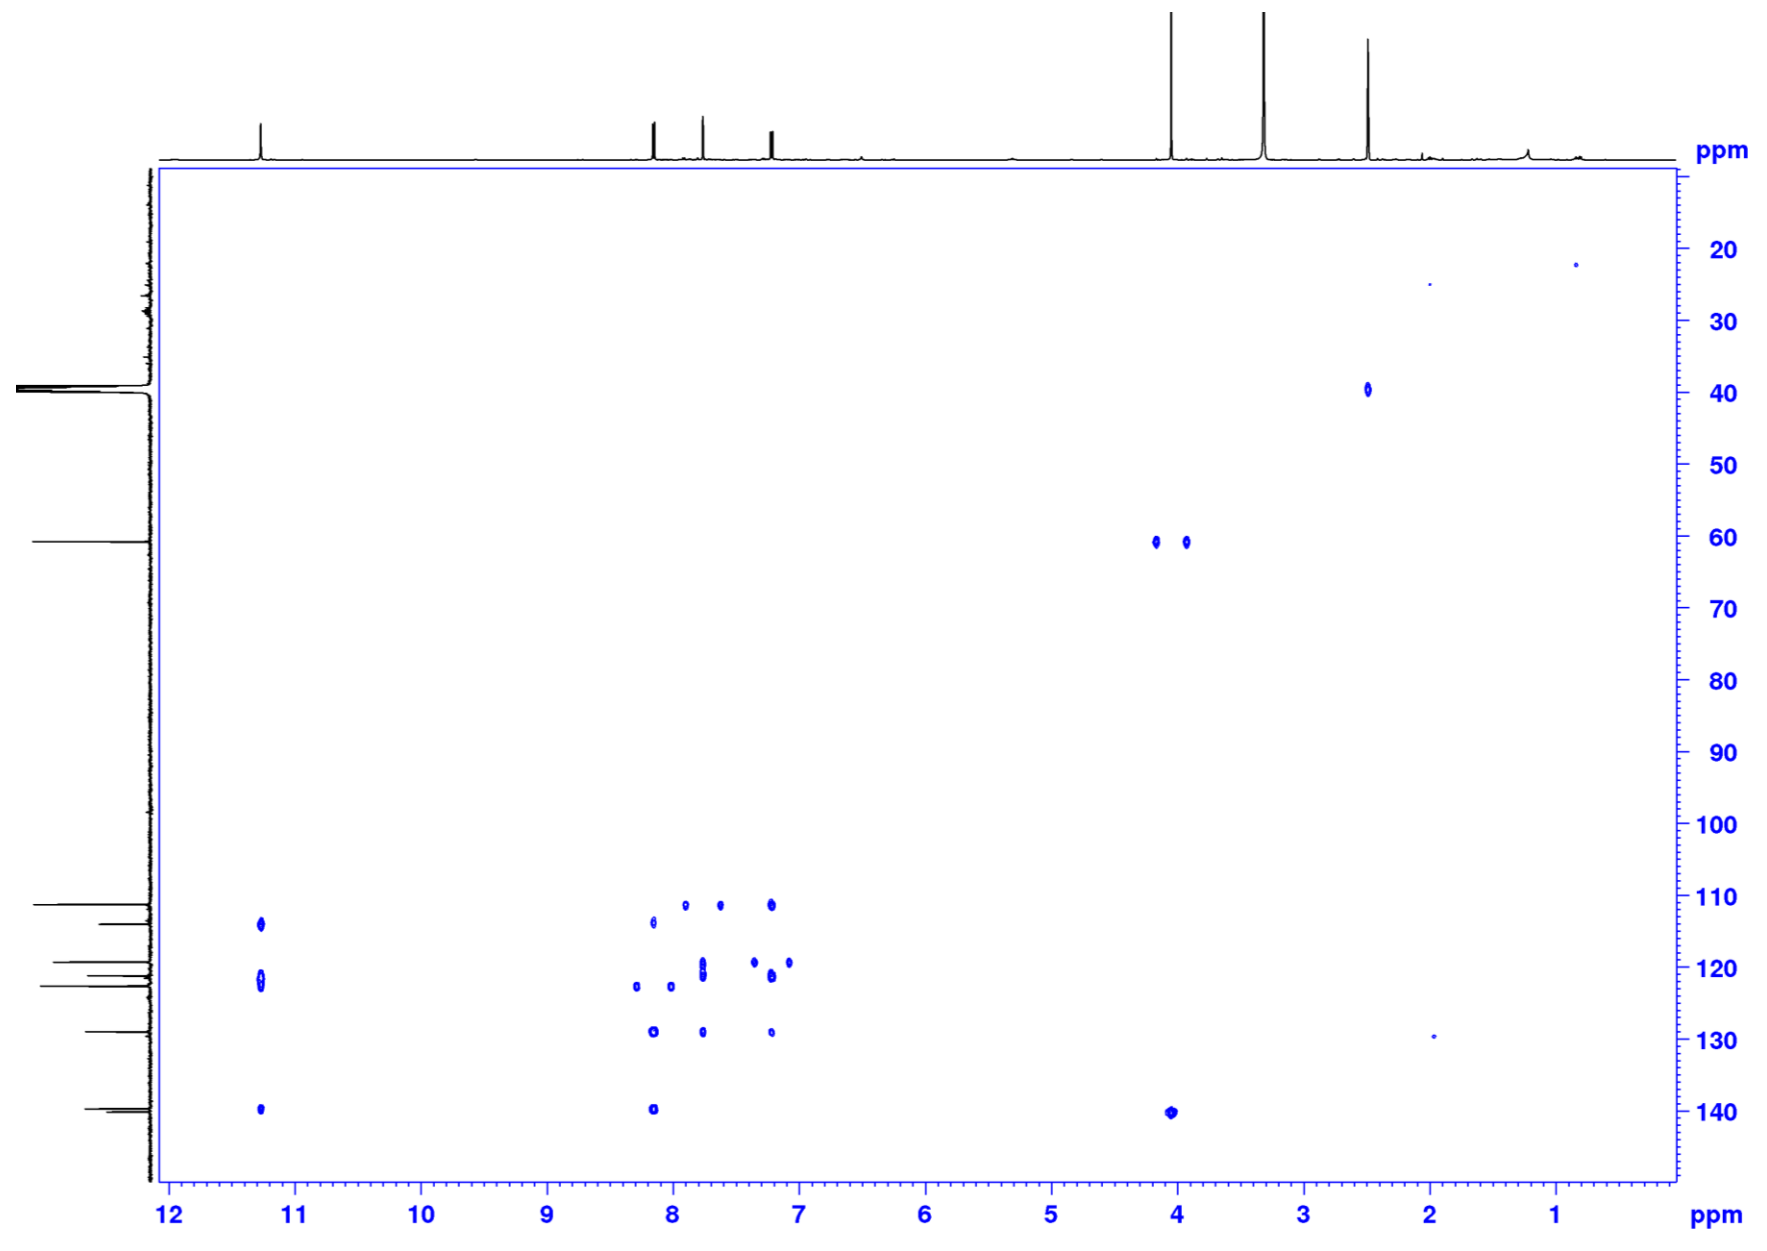

**Figure S21.**  $^1\text{H}$ - $^{13}\text{C}$  HMBC NMR spectrum (600 MHz,  $\text{DMSO-}d_6$ ) of borregomycin E (**4**)



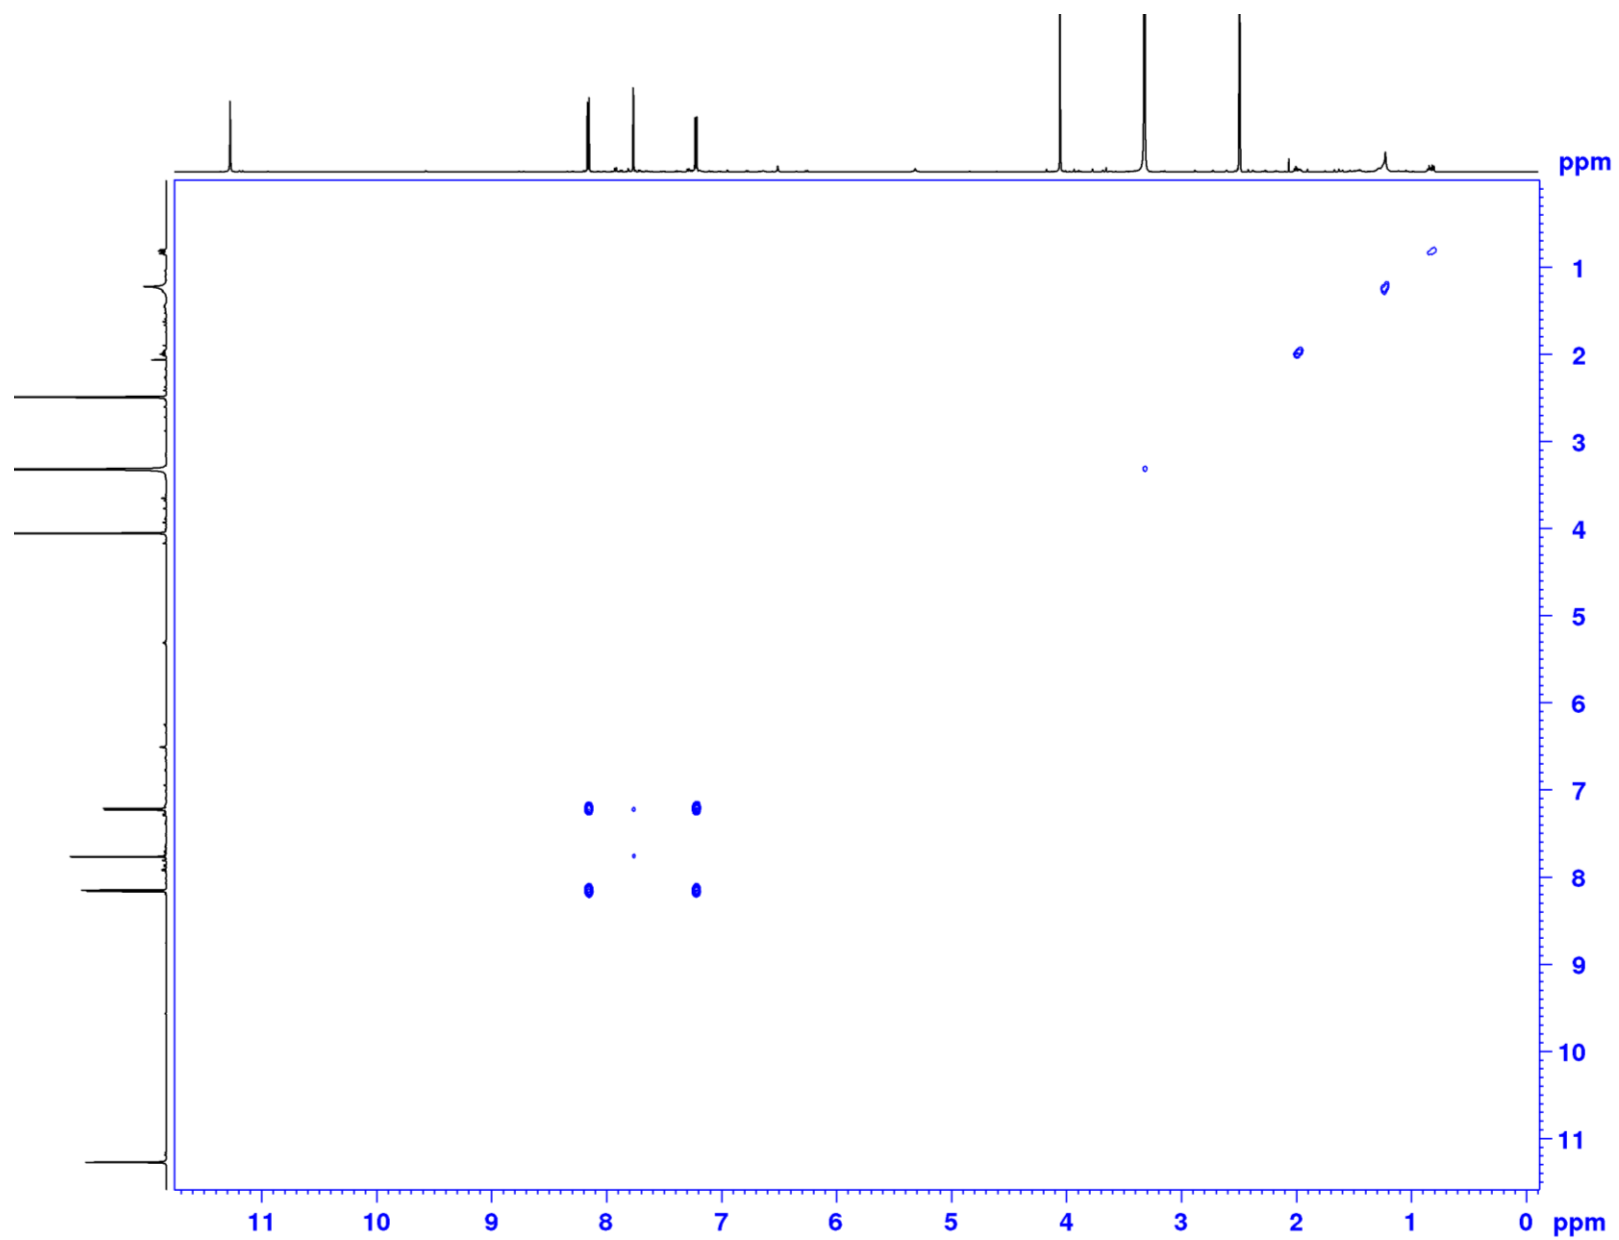

**Figure S22.**  $^1\text{H}$ - $^1\text{H}$  COSY NMR spectrum (600 MHz,  $\text{DMSO-}d_6$ ) of borregomycin E (**4**)

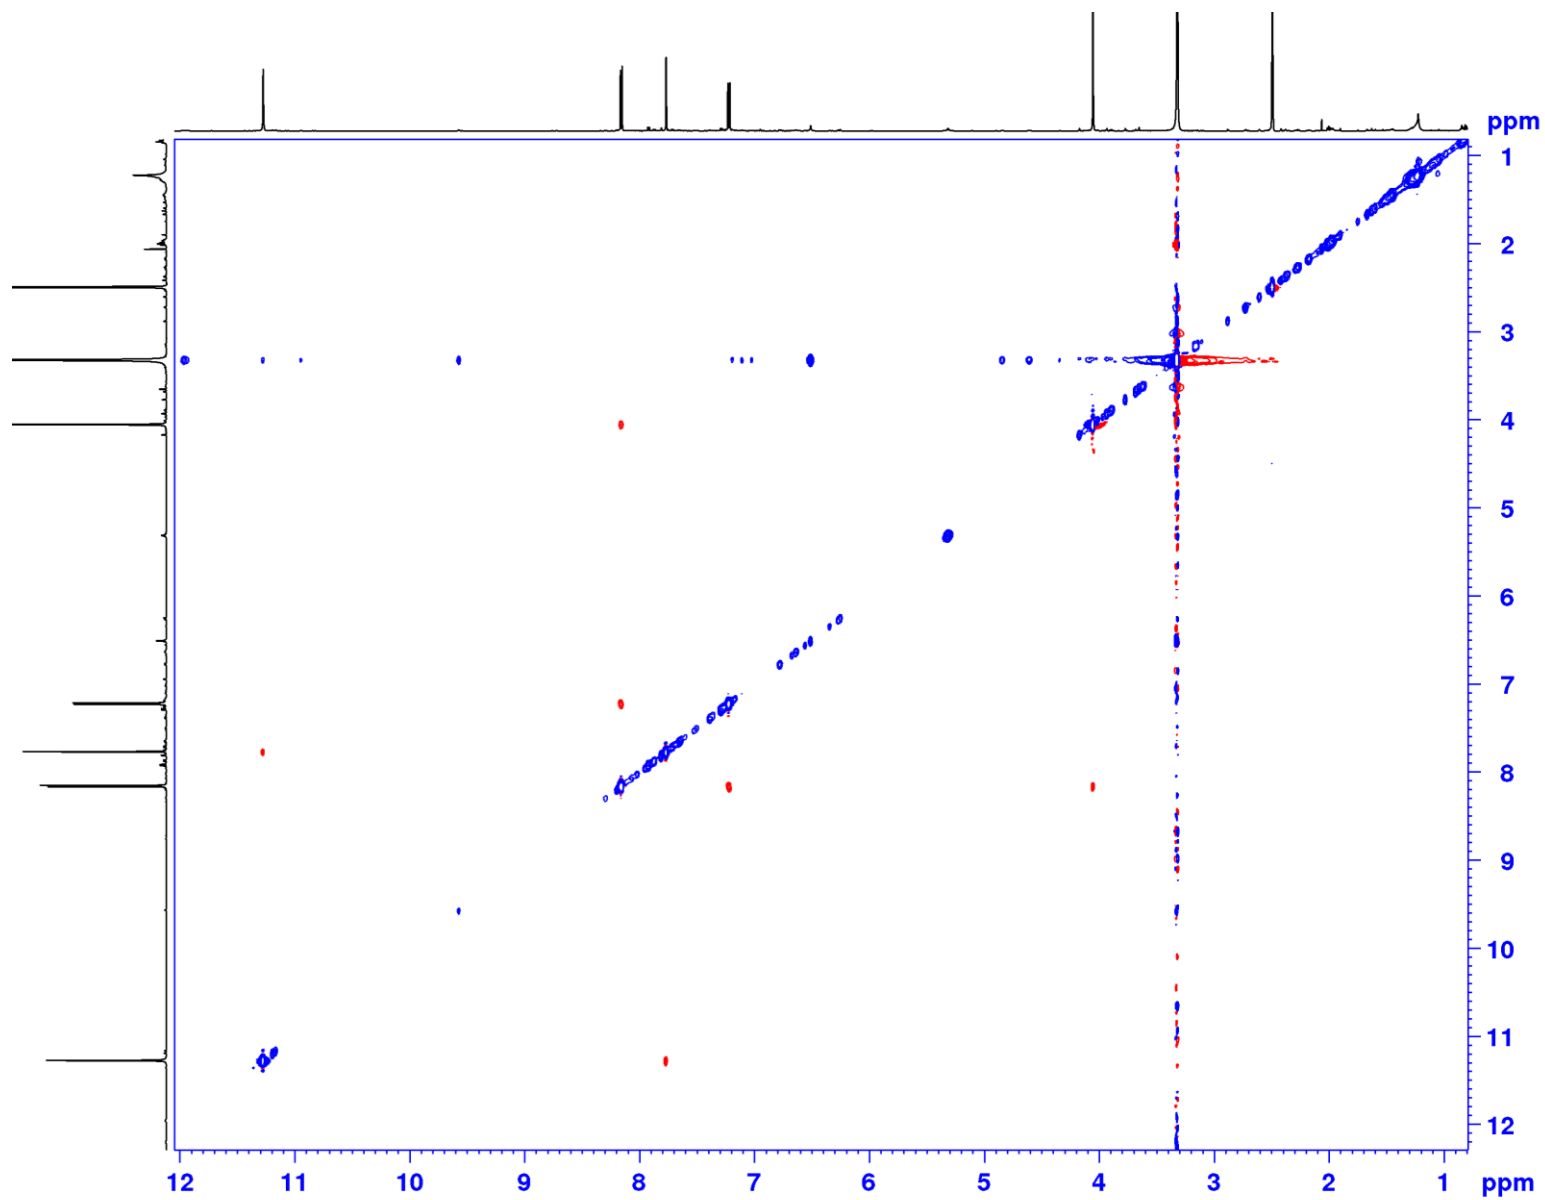

**Figure S23.**  $^1\text{H}$ - $^1\text{H}$  ROESY NMR spectrum (600 MHz,  $\text{DMSO-}d_6$ ) of borregomycin E (4)

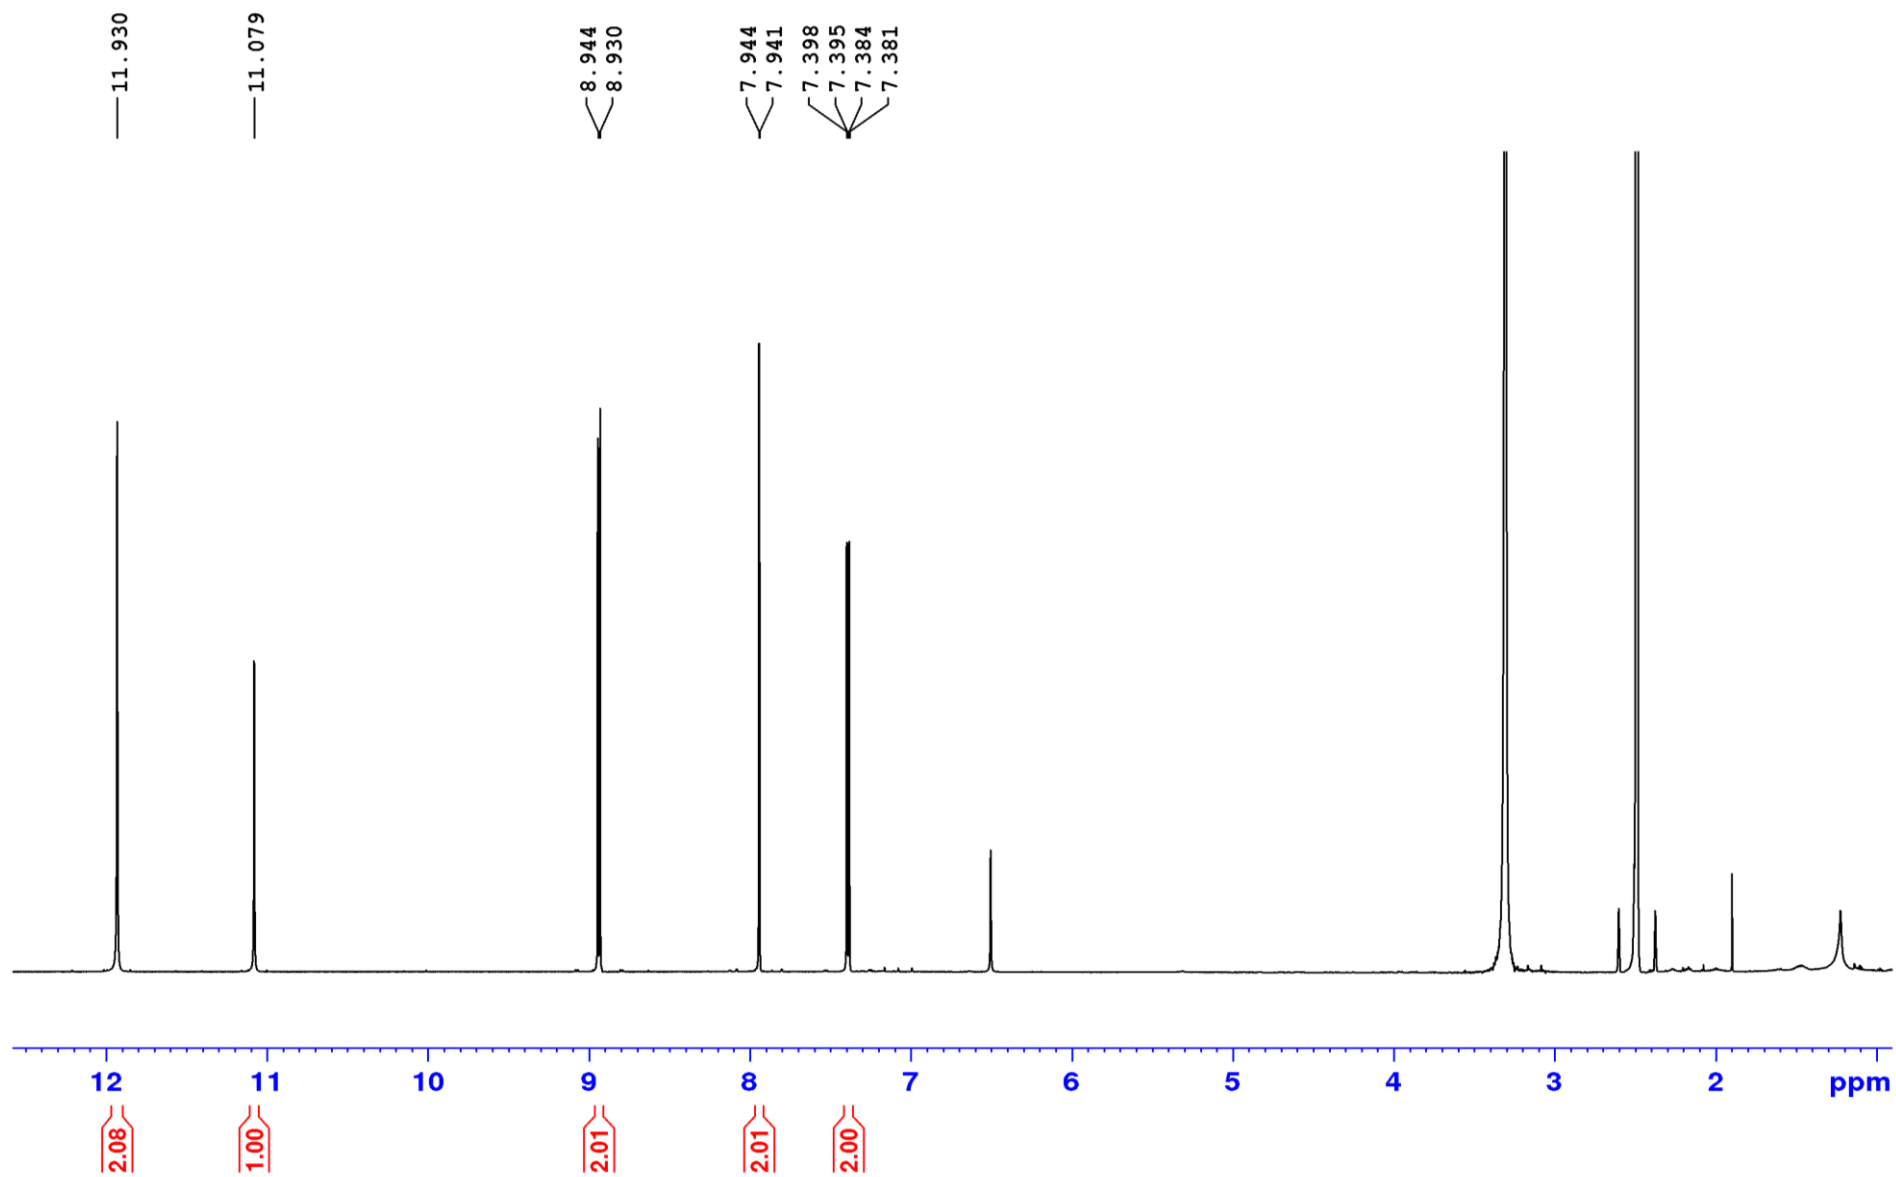

Figure S24.  $^1\text{H}$  NMR spectrum (600 MHz,  $\text{DMSO-}d_6$ ) of borregomycin F (**5**)

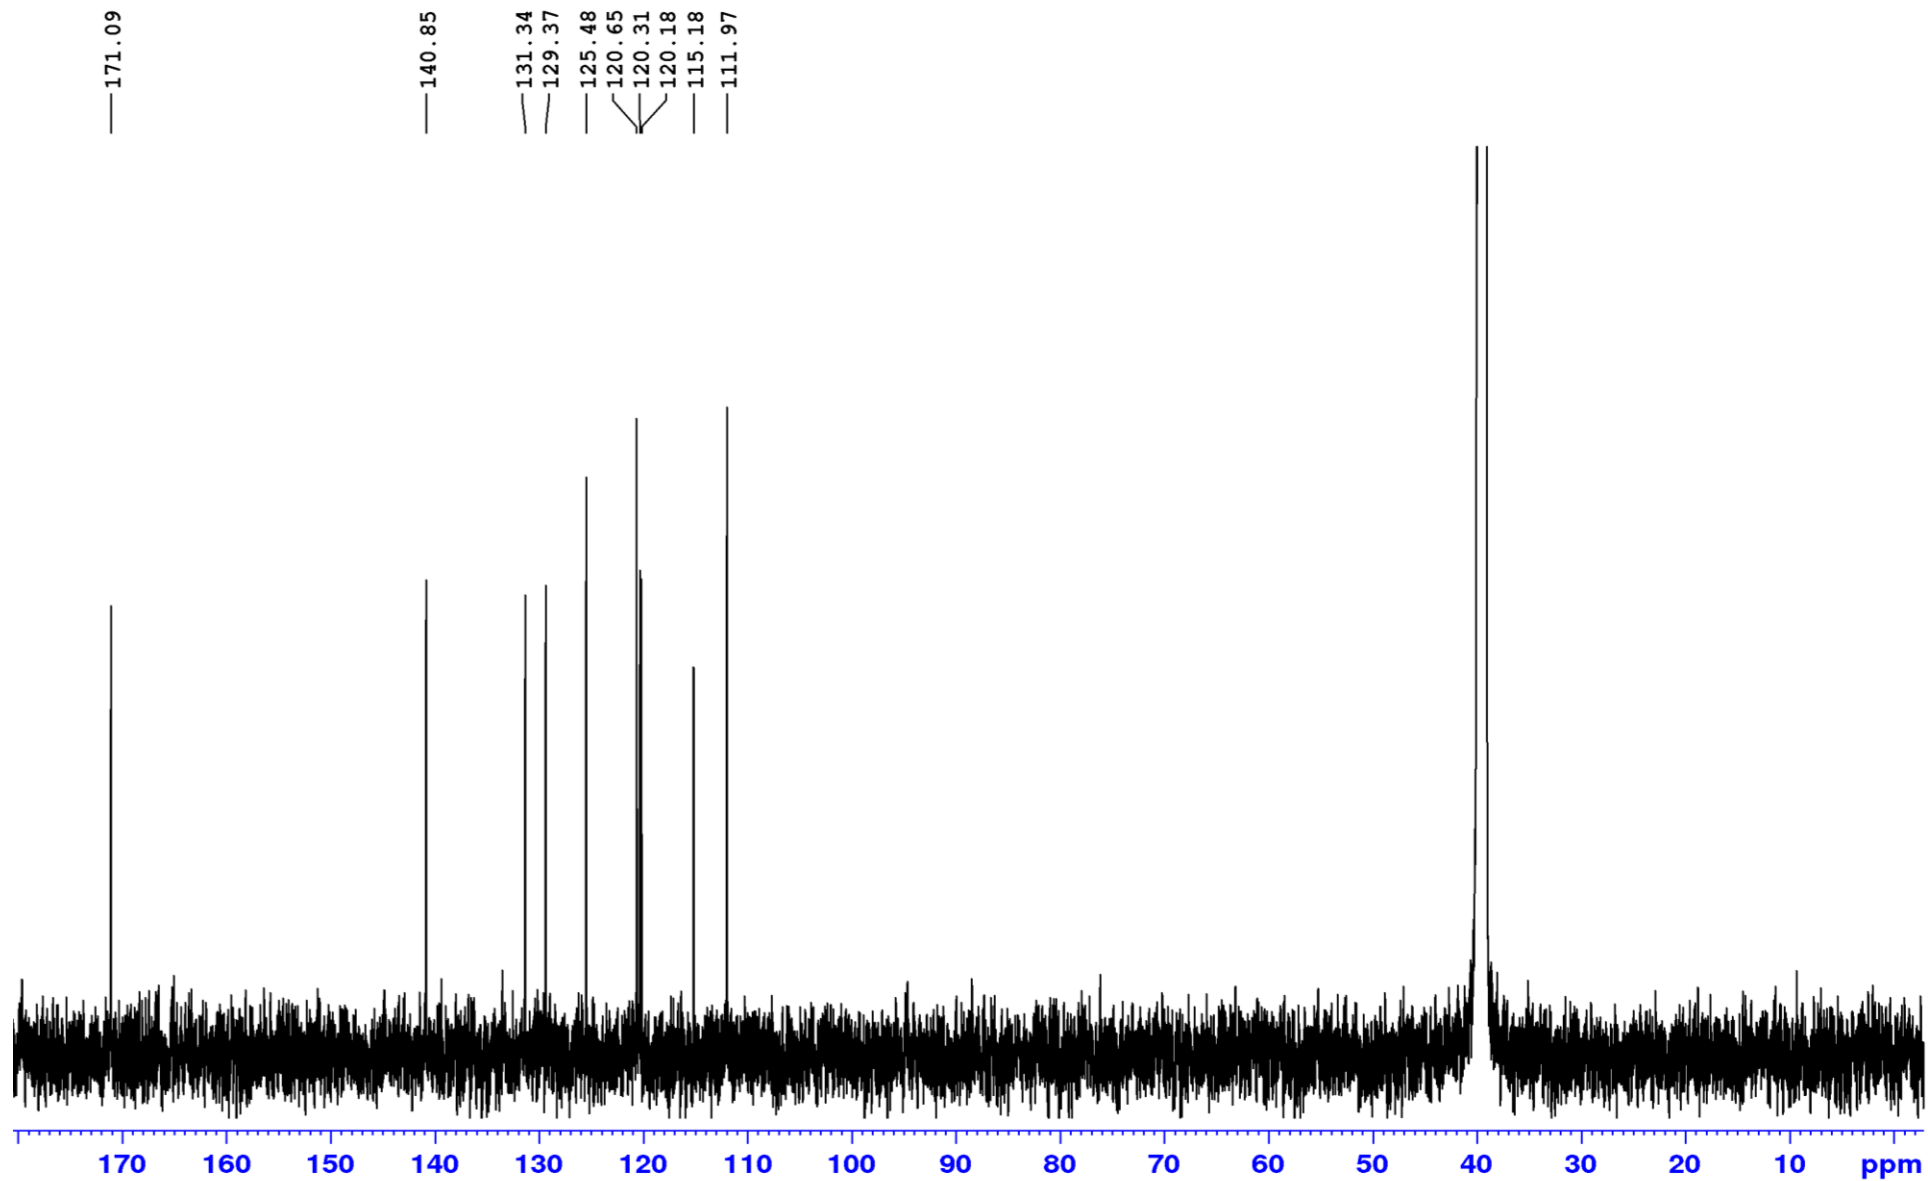

Figure S25.  $^{13}\text{C}$  NMR spectrum (150 MHz,  $\text{DMSO-}d_6$ ) of borregomycin F (**5**)

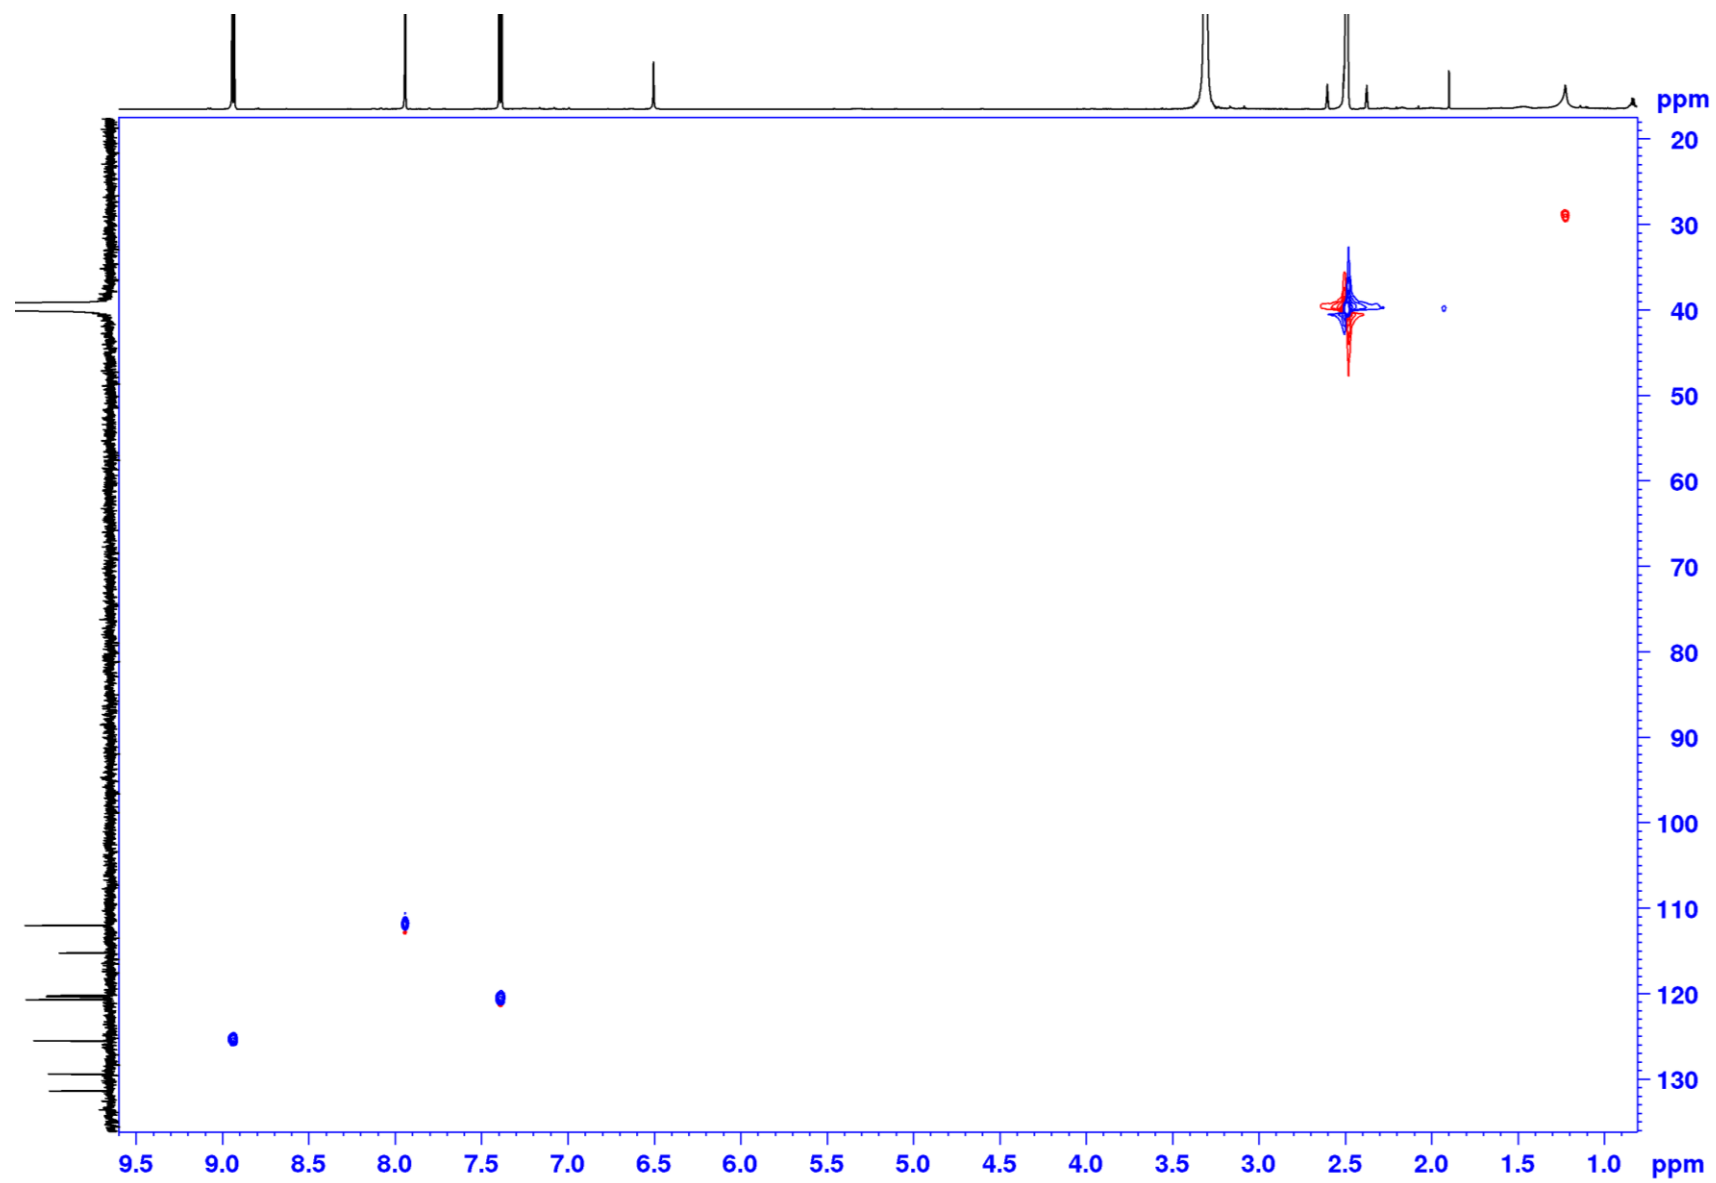

Figure S26. <sup>1</sup>H-<sup>13</sup>C HSQC NMR spectrum (600 MHz, DMSO-*d*<sub>6</sub>) of borregomycin F (**5**)

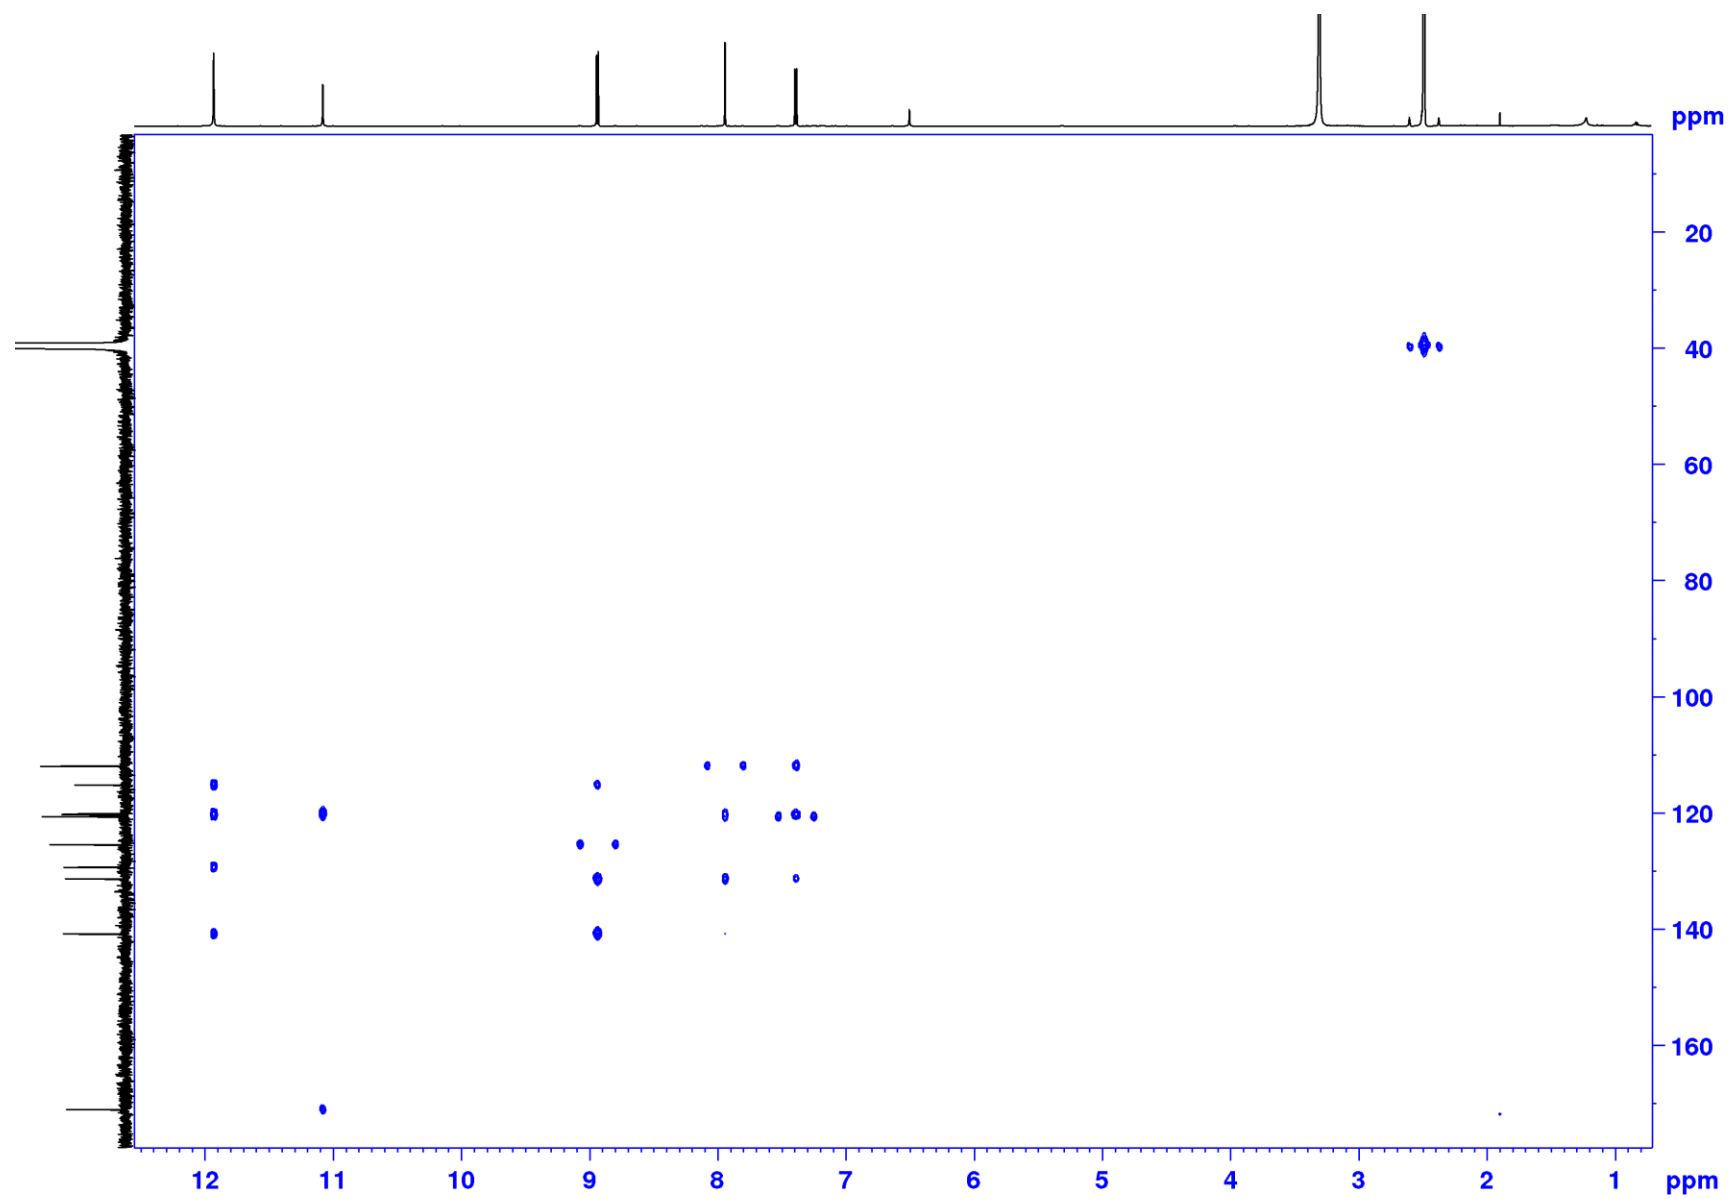

**Figure S27.**  $^1\text{H}$ - $^{13}\text{C}$  HMBC NMR spectrum (600 MHz,  $\text{DMSO-}d_6$ ) of borregomycin F (**5**)

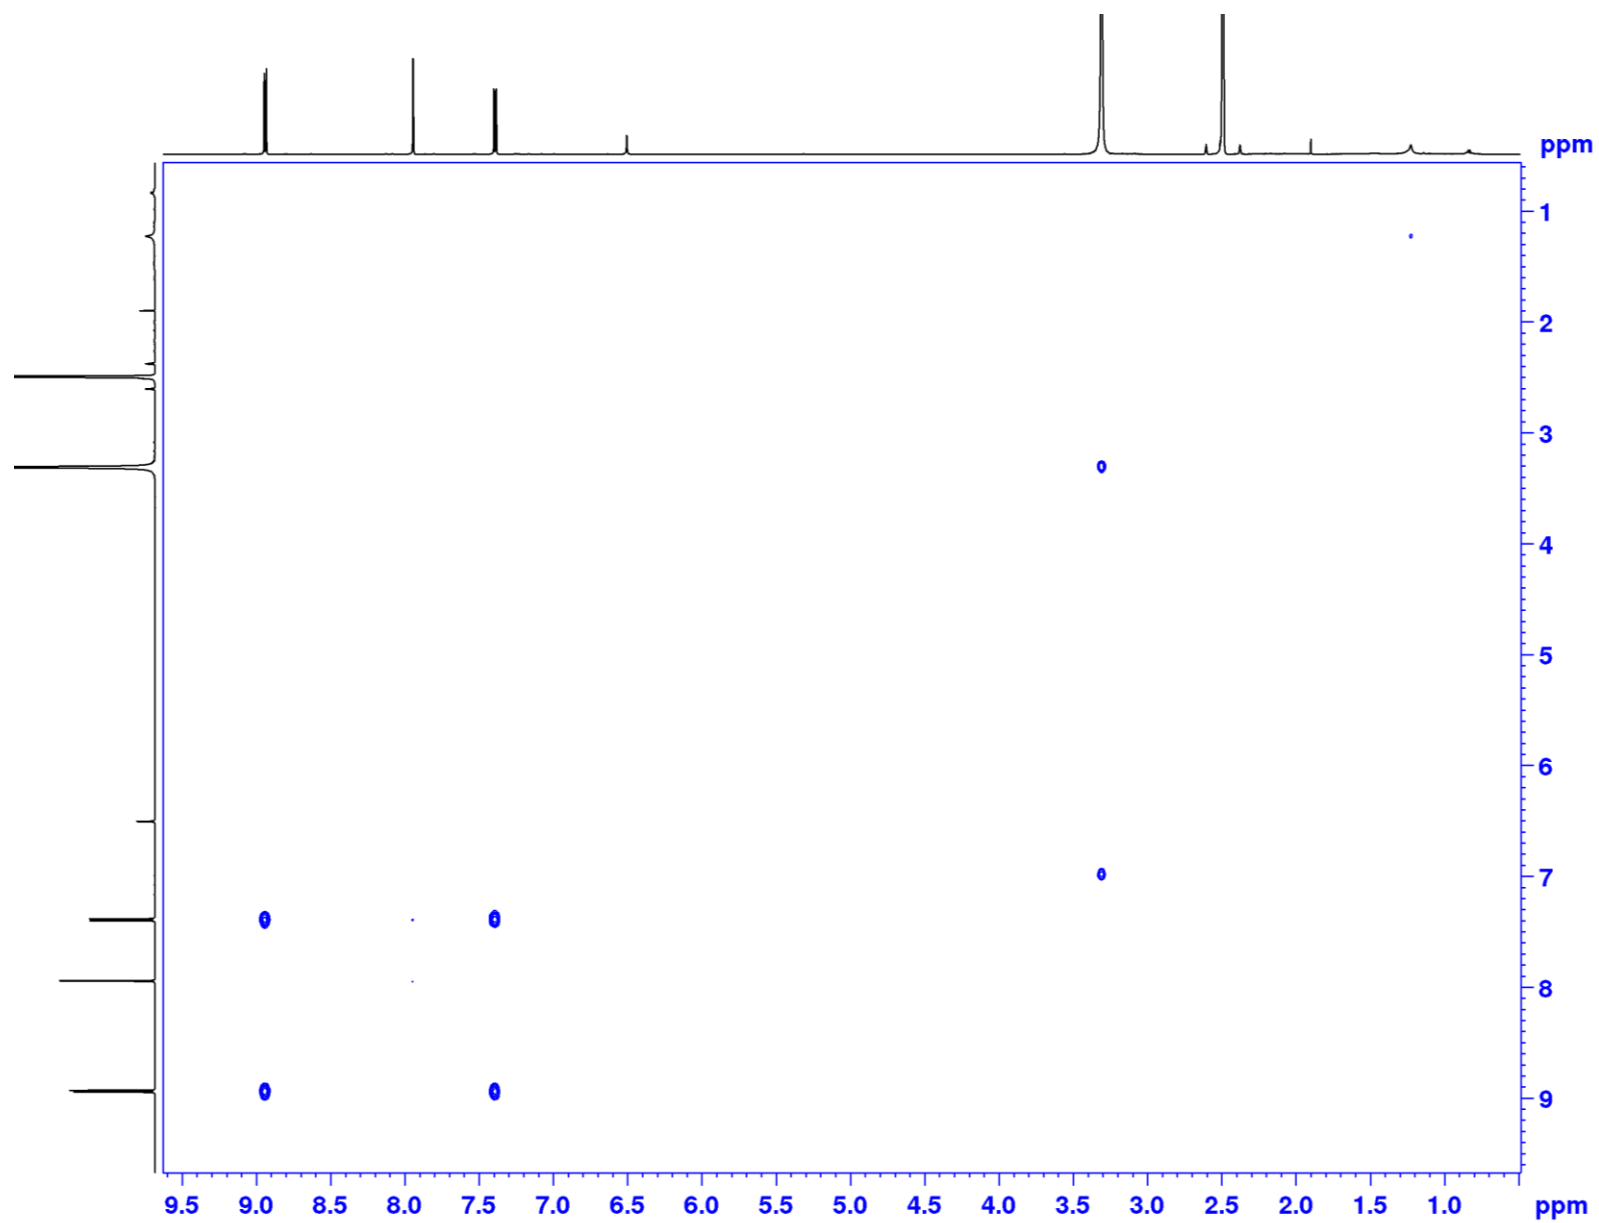

**Figure S28.** <sup>1</sup>H-<sup>1</sup>H COSY NMR spectrum (600 MHz, DMSO-*d*<sub>6</sub>) of borregomycin F (**5**)

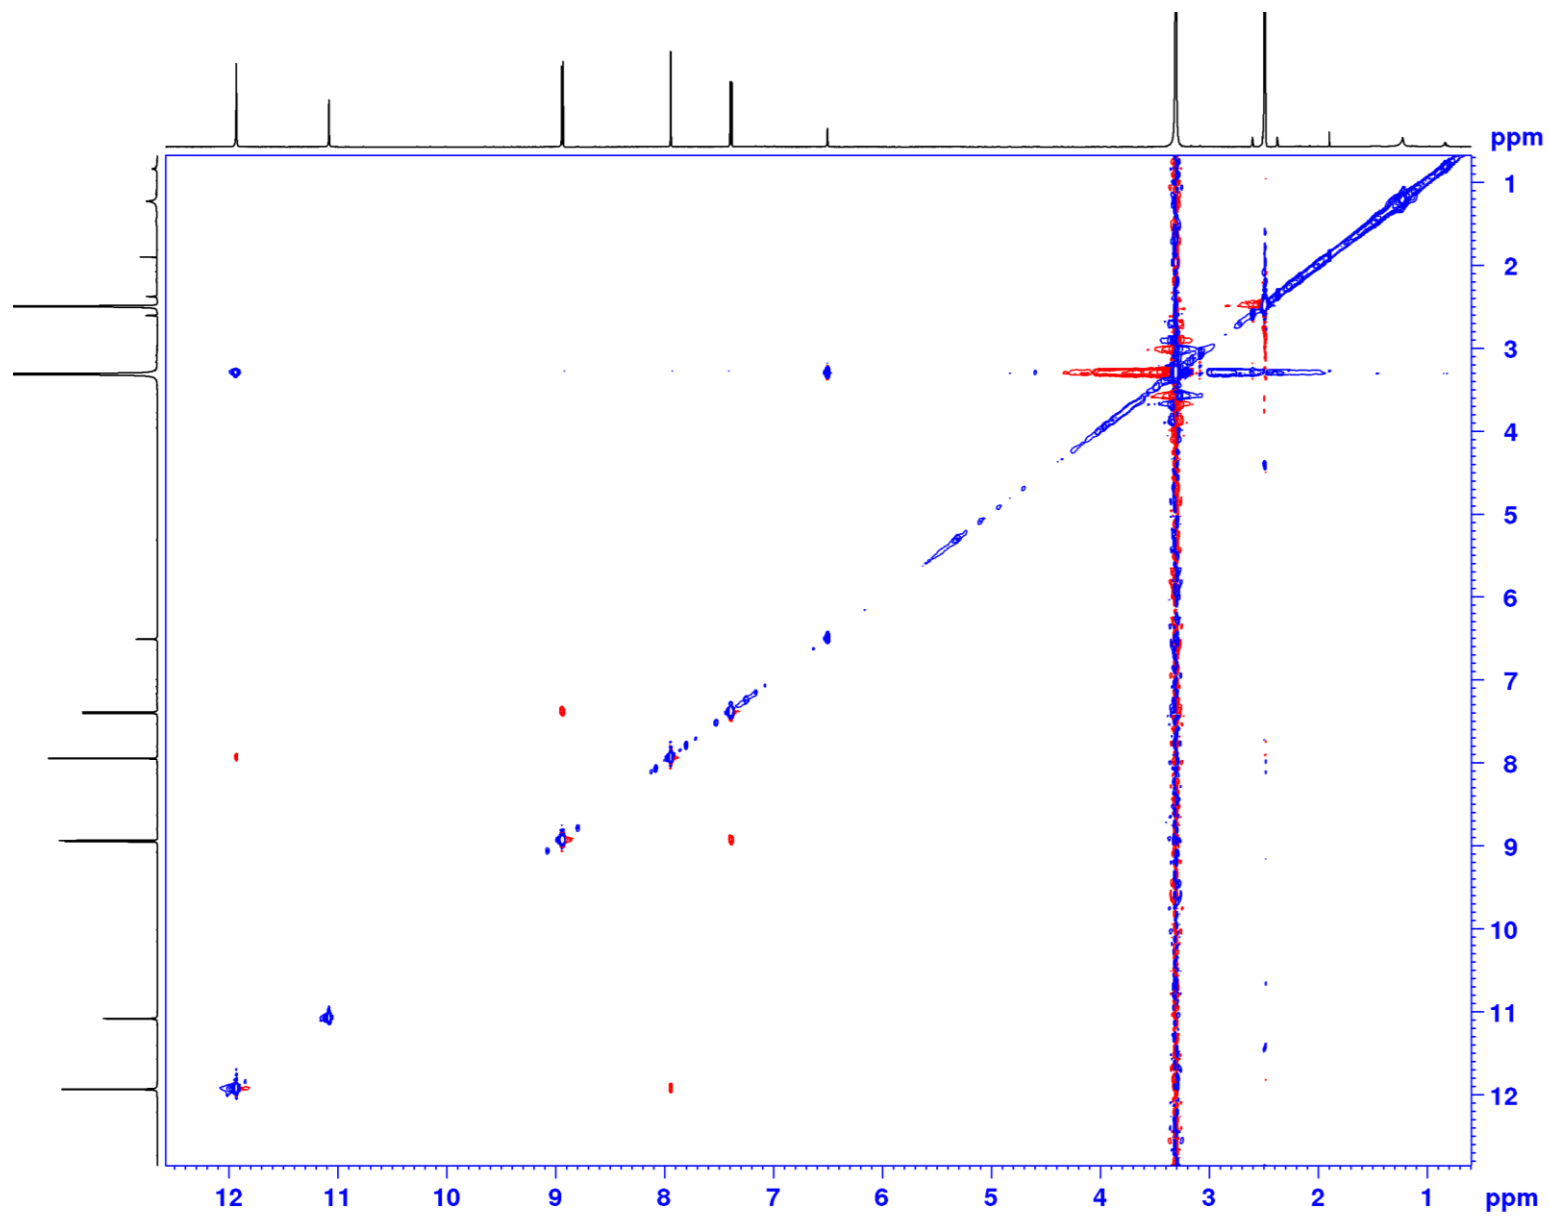

**Figure S29.**  $^1\text{H}$ - $^1\text{H}$  ROESY NMR spectrum (600 MHz,  $\text{DMSO-}d_6$ ) of borregomycin F (**5**)



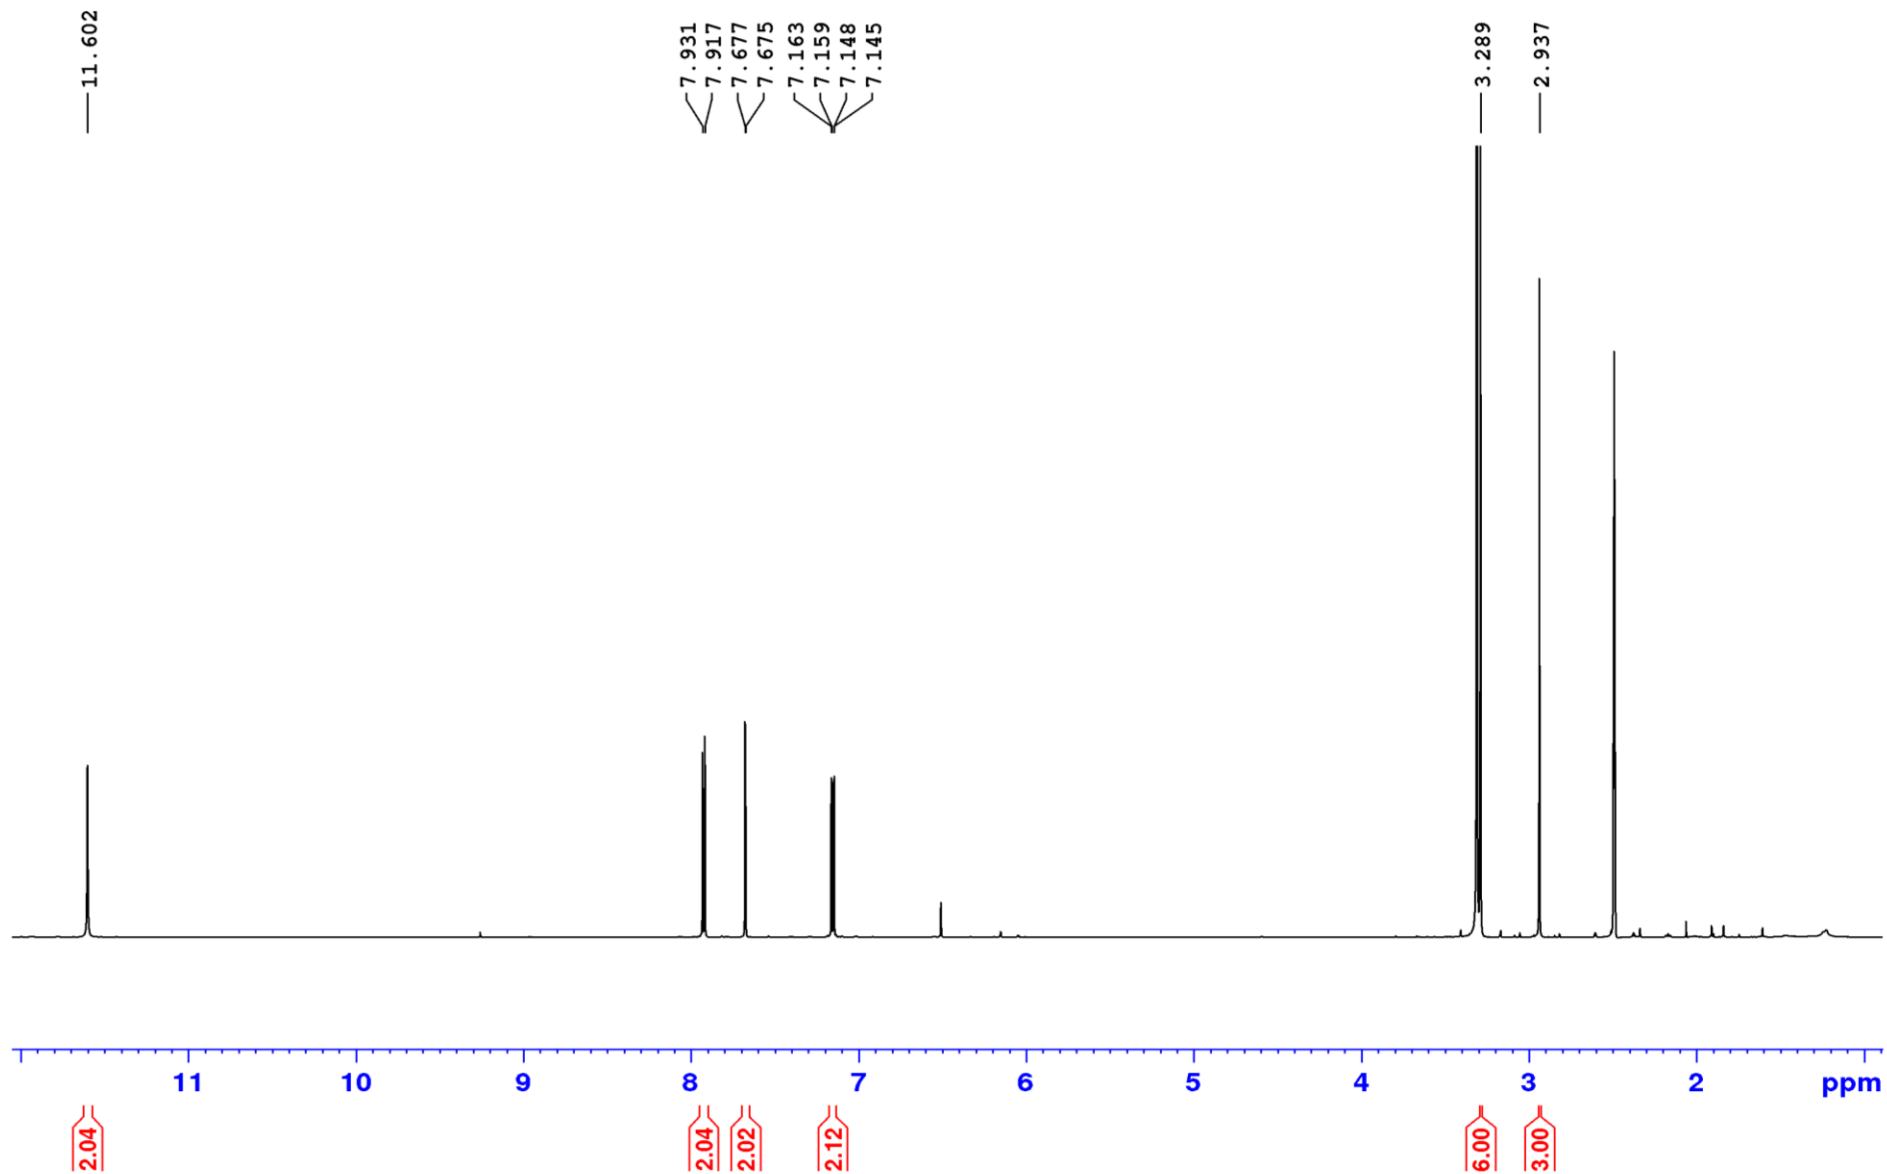

Figure S30.  $^1\text{H}$  NMR spectrum (600 MHz,  $\text{DMSO-}d_6$ ) of borregomycin B (6)

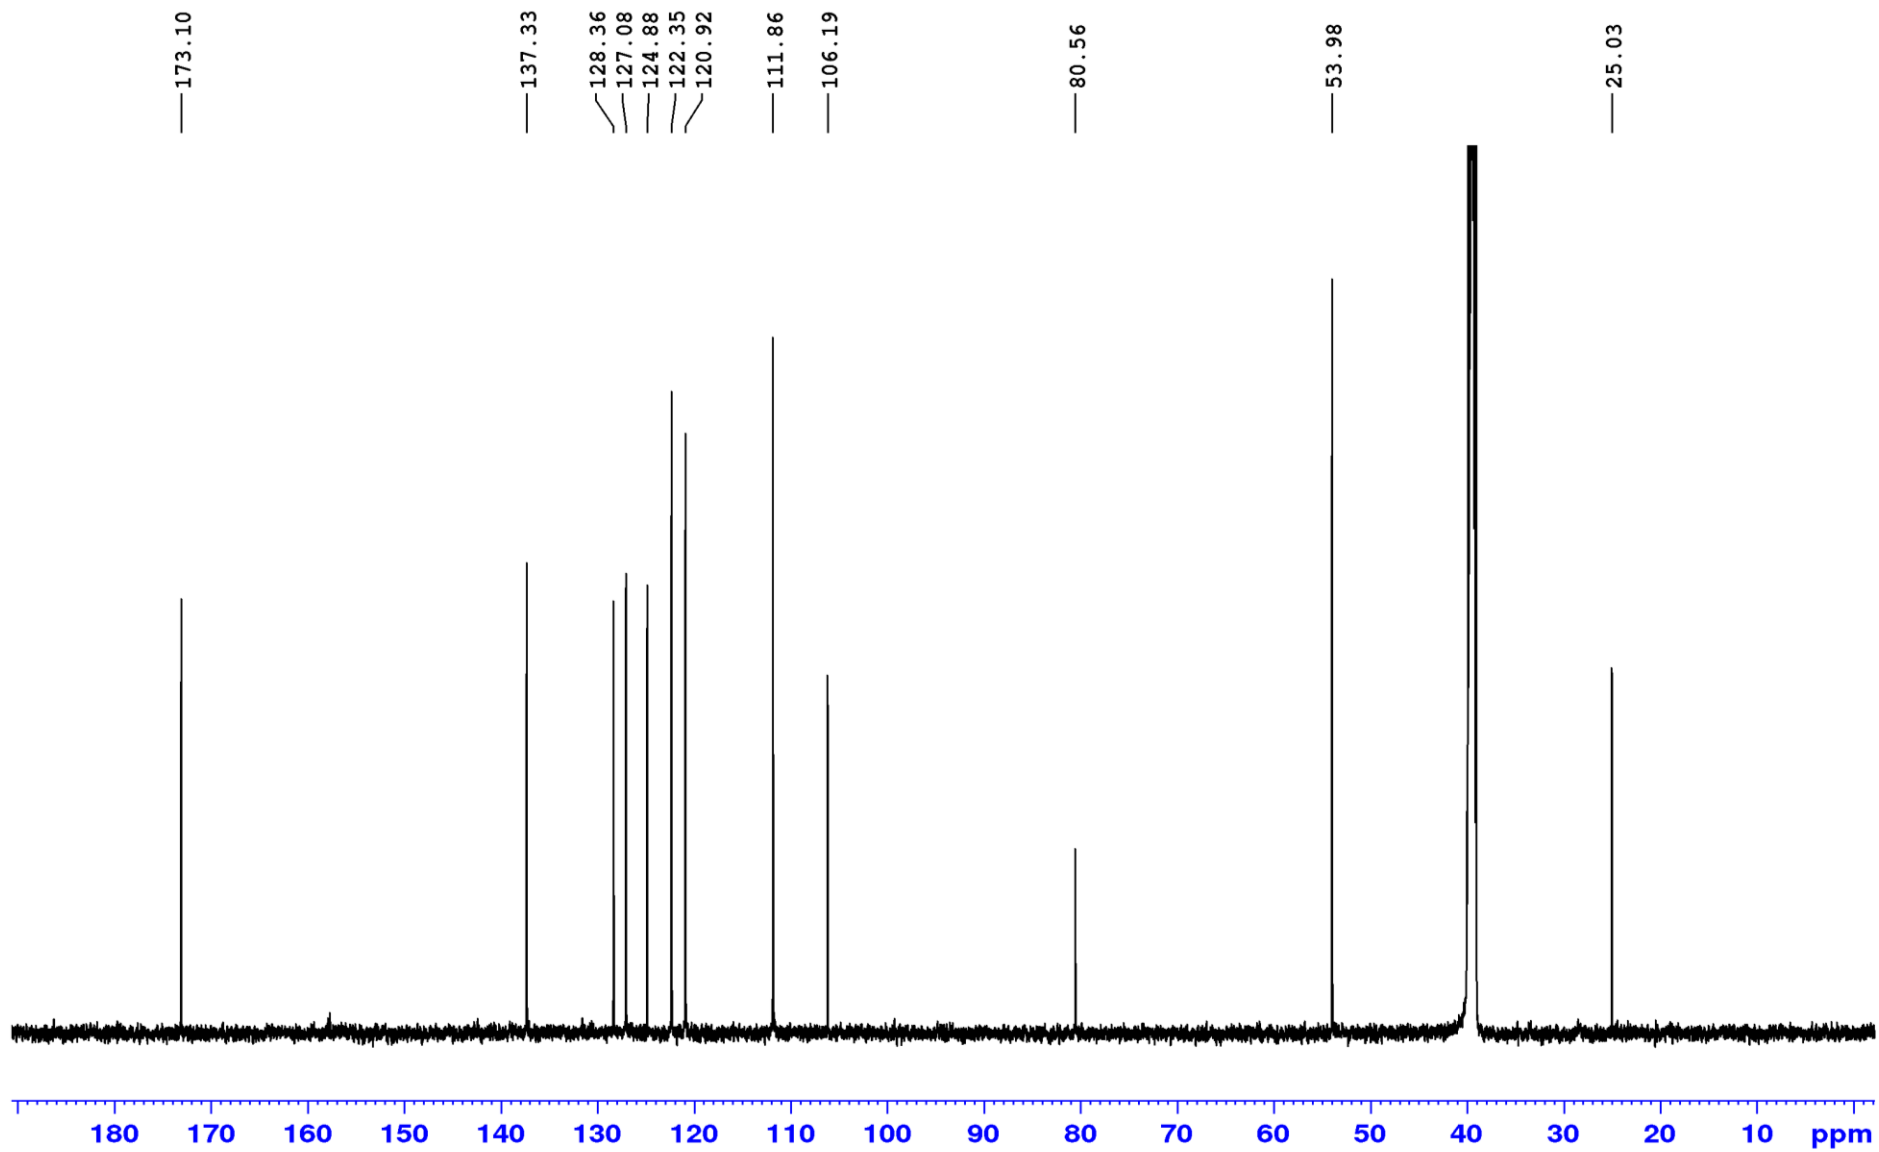

Figure S31.  $^{13}\text{C}$  NMR spectrum (150 MHz,  $\text{DMSO-}d_6$ ) of borregomycin B (6)

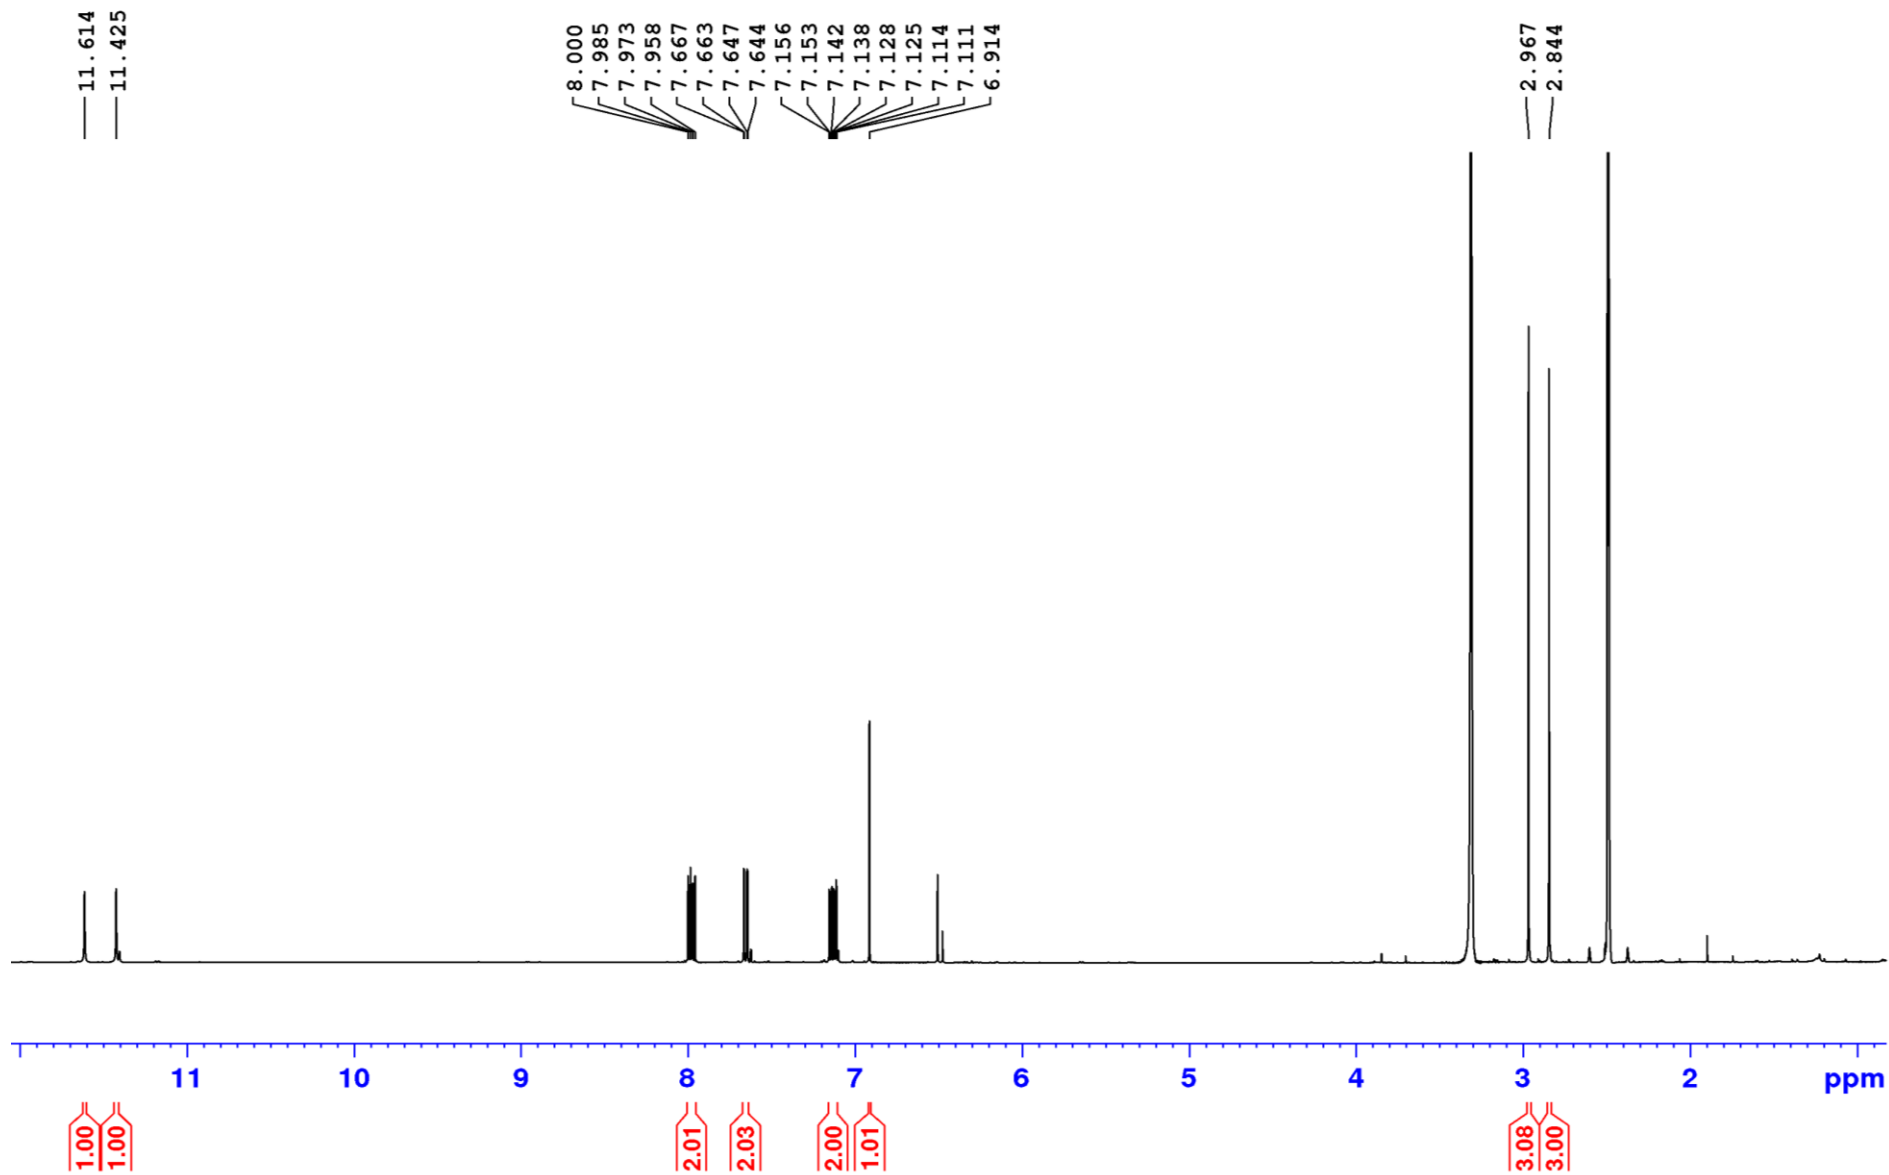

**Figure S32.**  $^1\text{H}$  NMR spectrum (600 MHz,  $\text{DMSO-}d_6$ ) of borregomycin C (**7**)

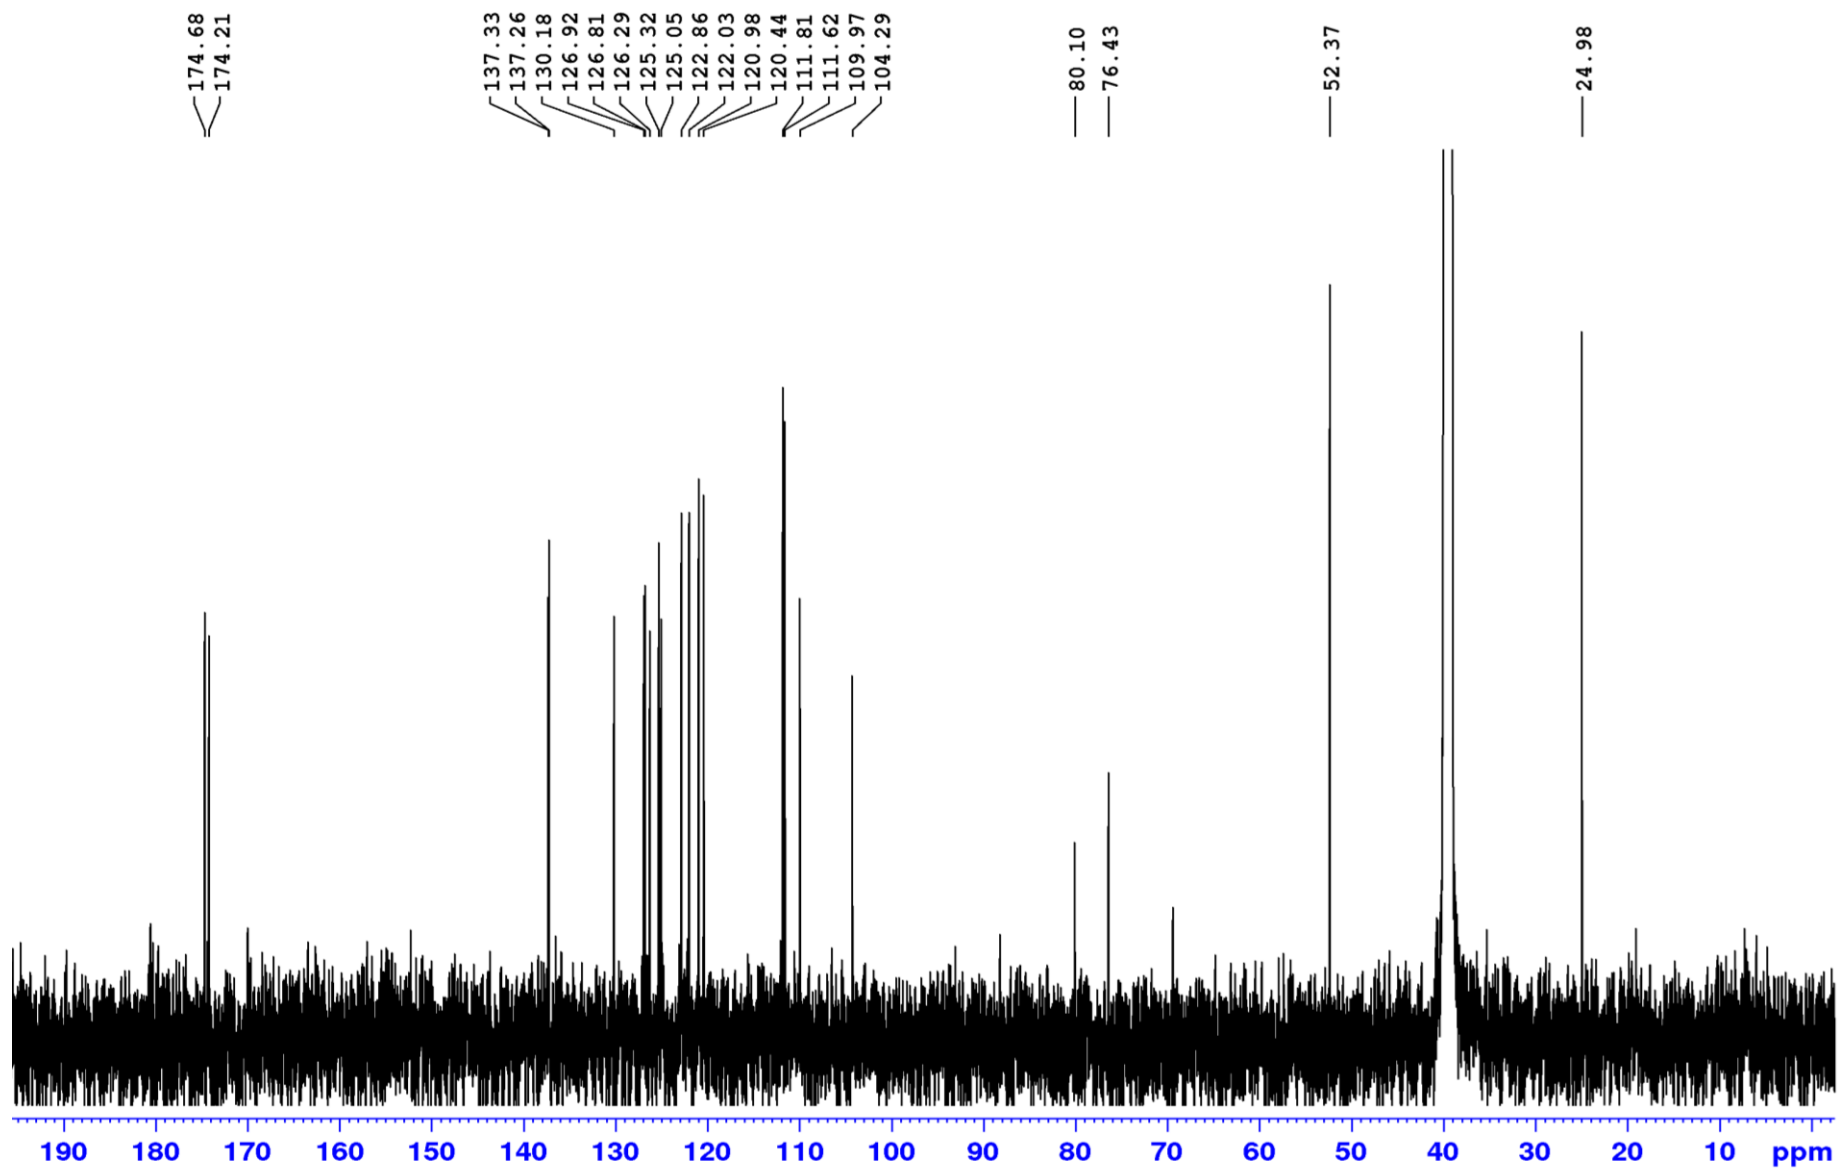

Figure S33.  $^{13}\text{C}$  NMR spectrum (150 MHz,  $\text{DMSO-}d_6$ ) of borregomycin C (7)

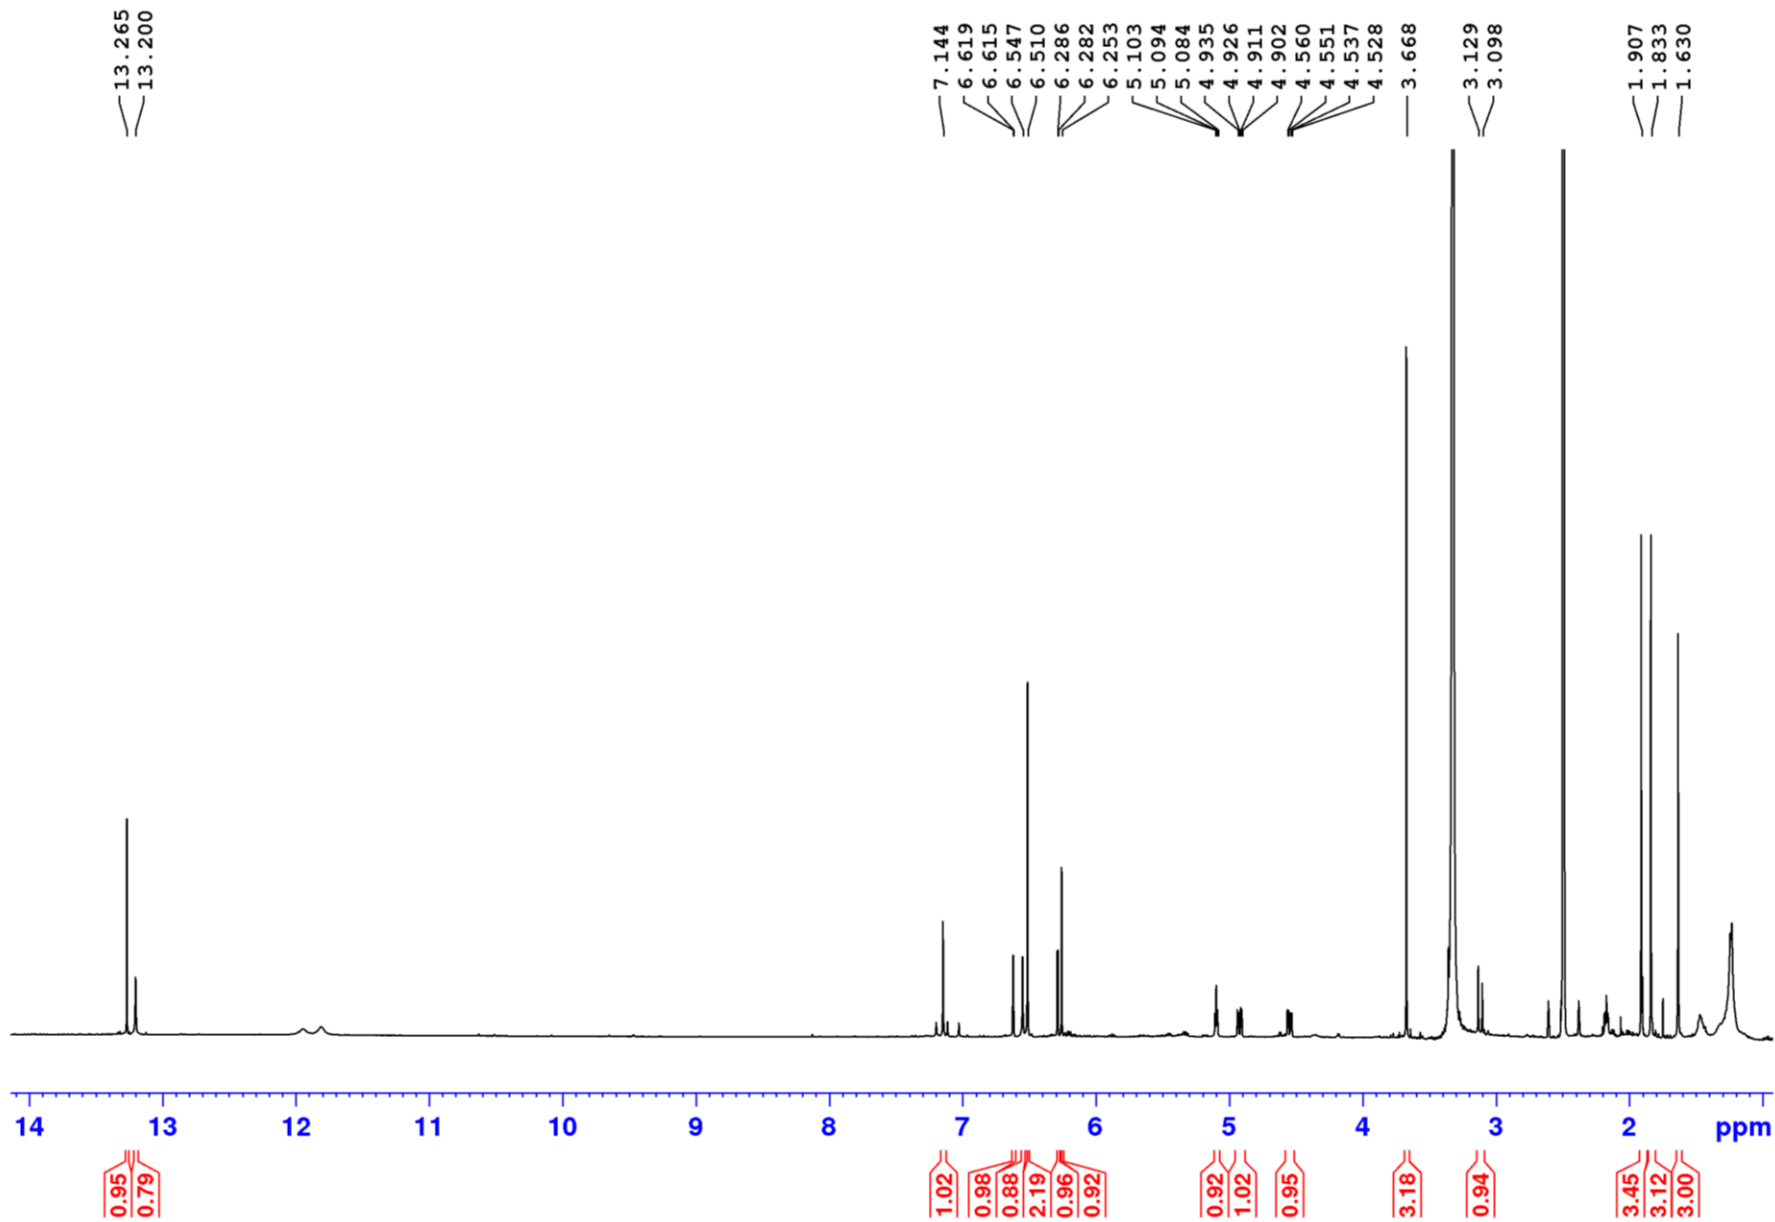

Figure S34.  $^1\text{H}$  NMR spectrum (600 MHz,  $\text{DMSO-}d_6$ ) of (+)-ABX-G (**8**)

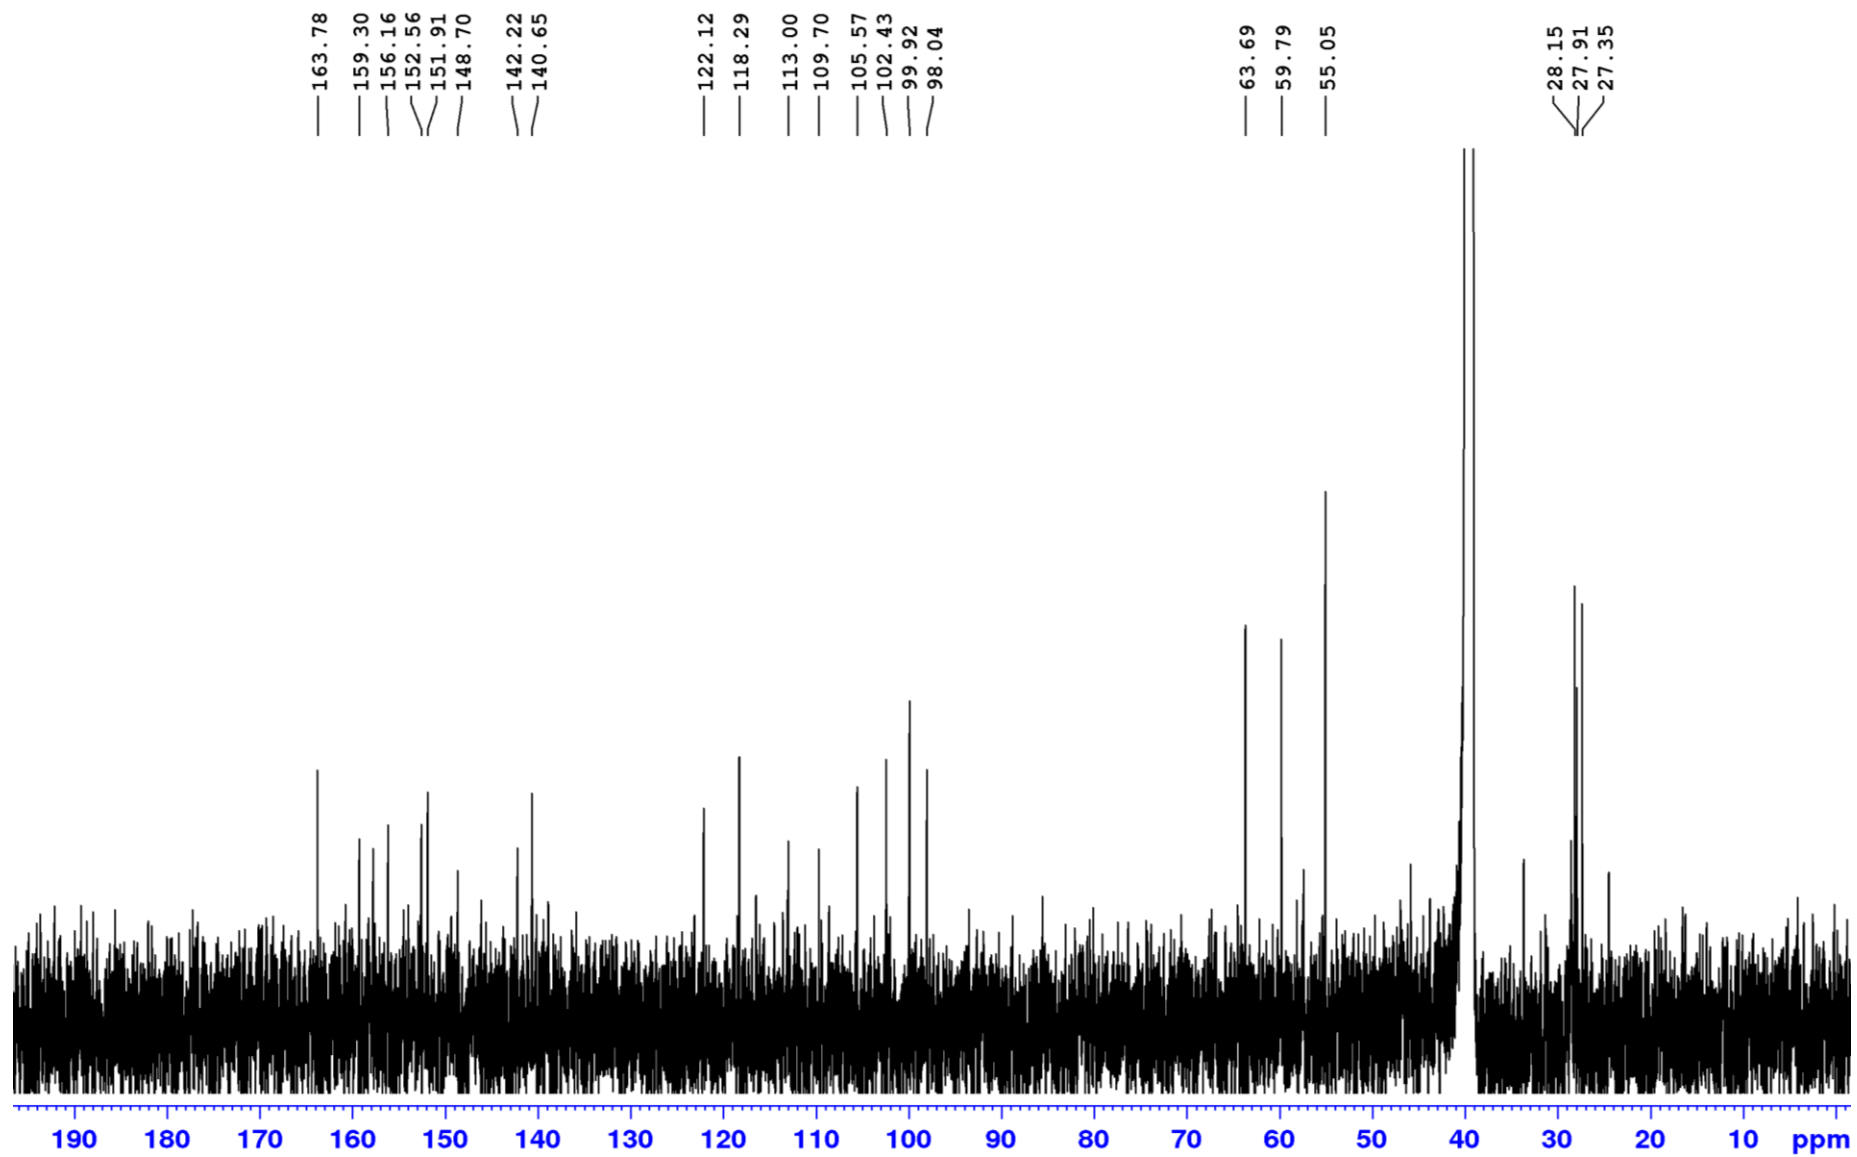

Figure S35.  $^{13}\text{C}$  NMR spectrum (150 MHz,  $\text{DMSO-}d_6$ ) of (+)-ABX-G (**8**)

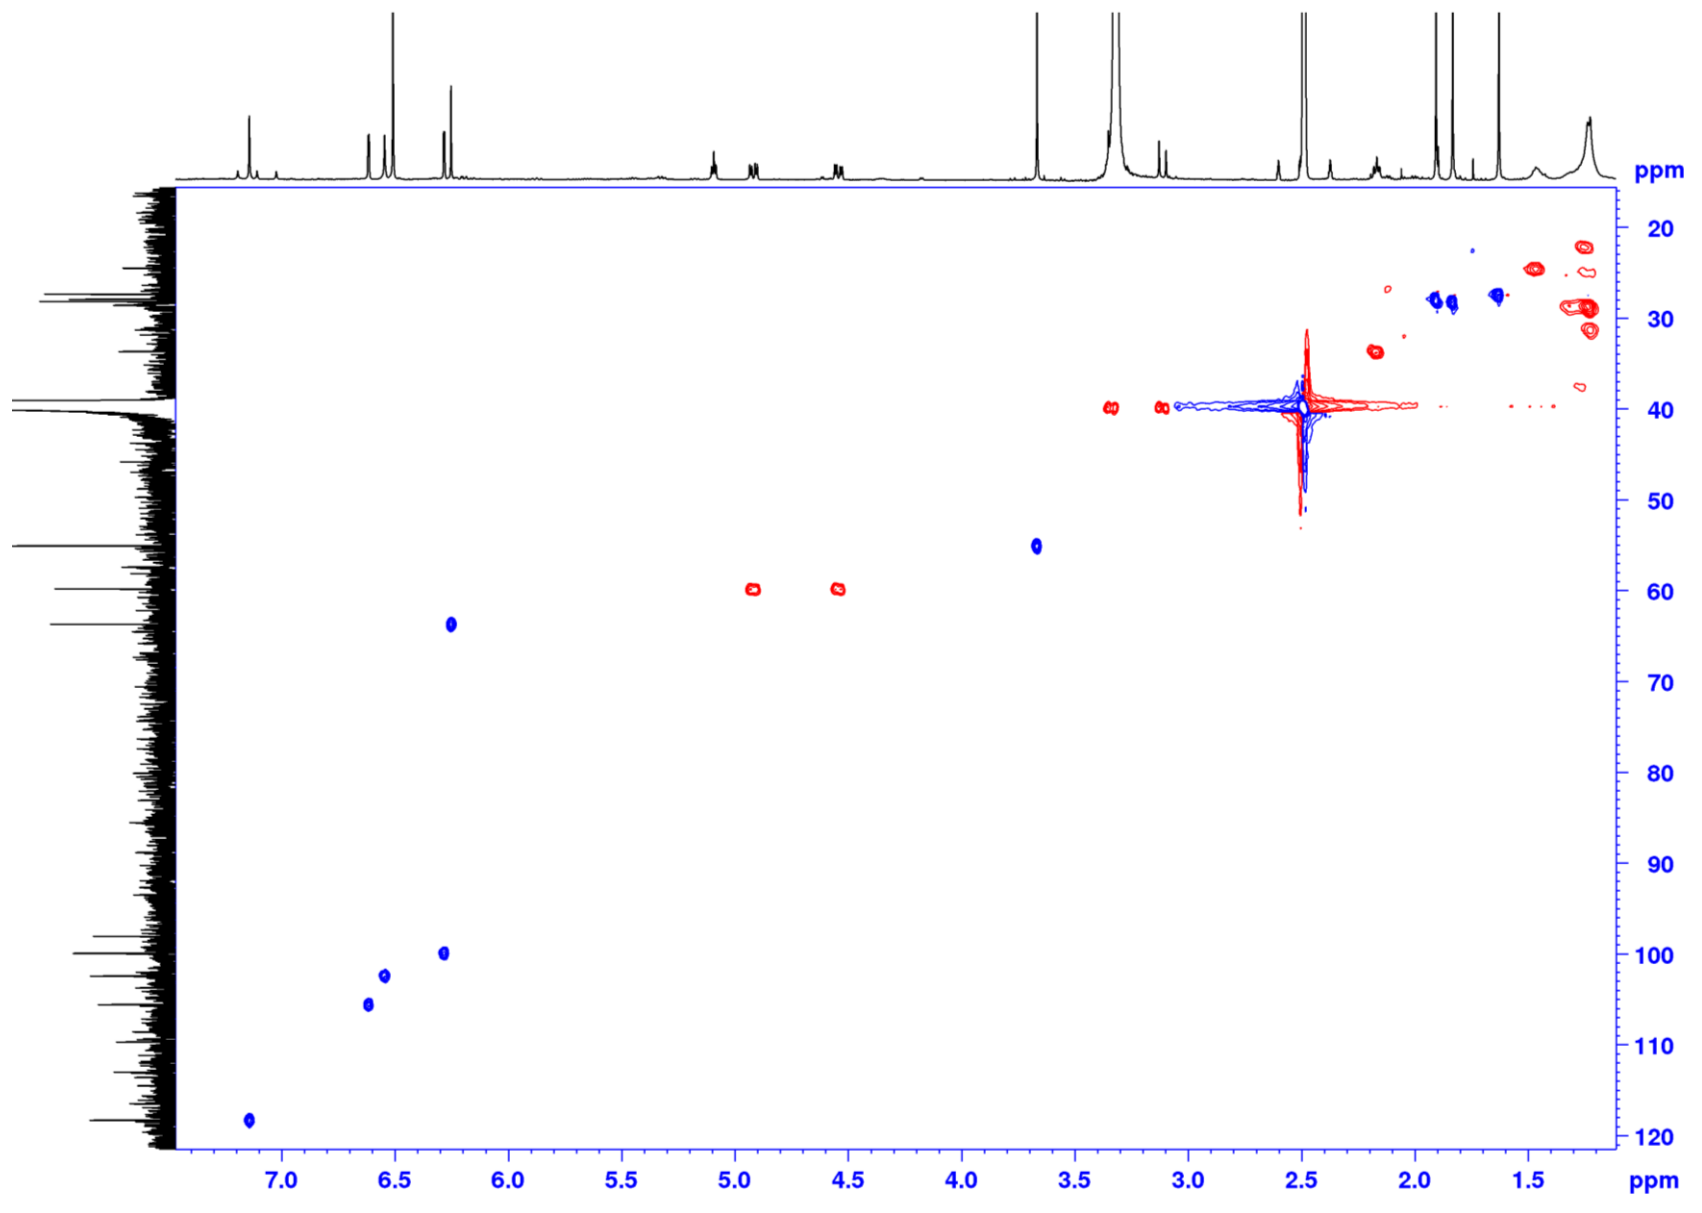

Figure S36.  $^1\text{H}$ - $^{13}\text{C}$  HSQC NMR spectrum (600 MHz,  $\text{DMSO-}d_6$ ) of (+)-ABX-G (**8**)

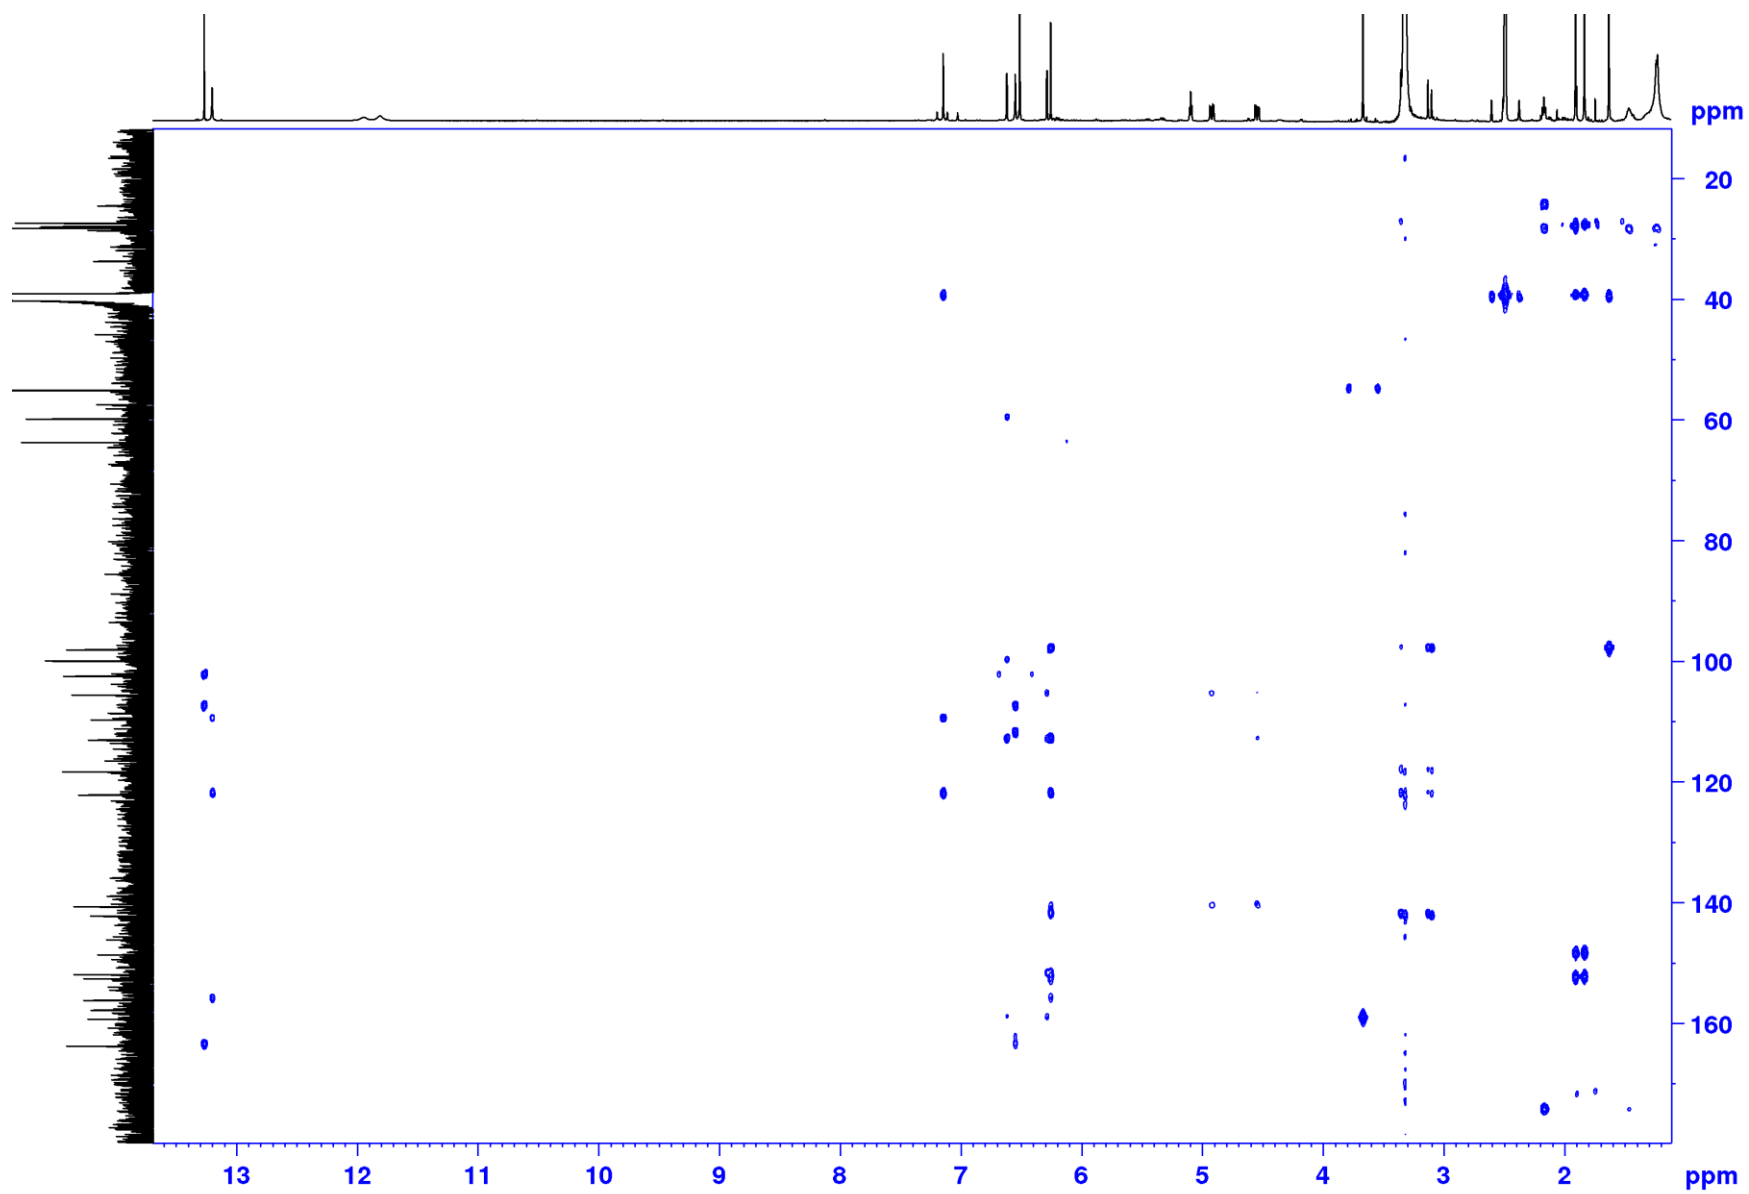

**Figure S37.**  $^1\text{H}$ - $^{13}\text{C}$  HMBC NMR spectrum (600 MHz,  $\text{DMSO-}d_6$ ) of (+)-ABX-G (**8**)



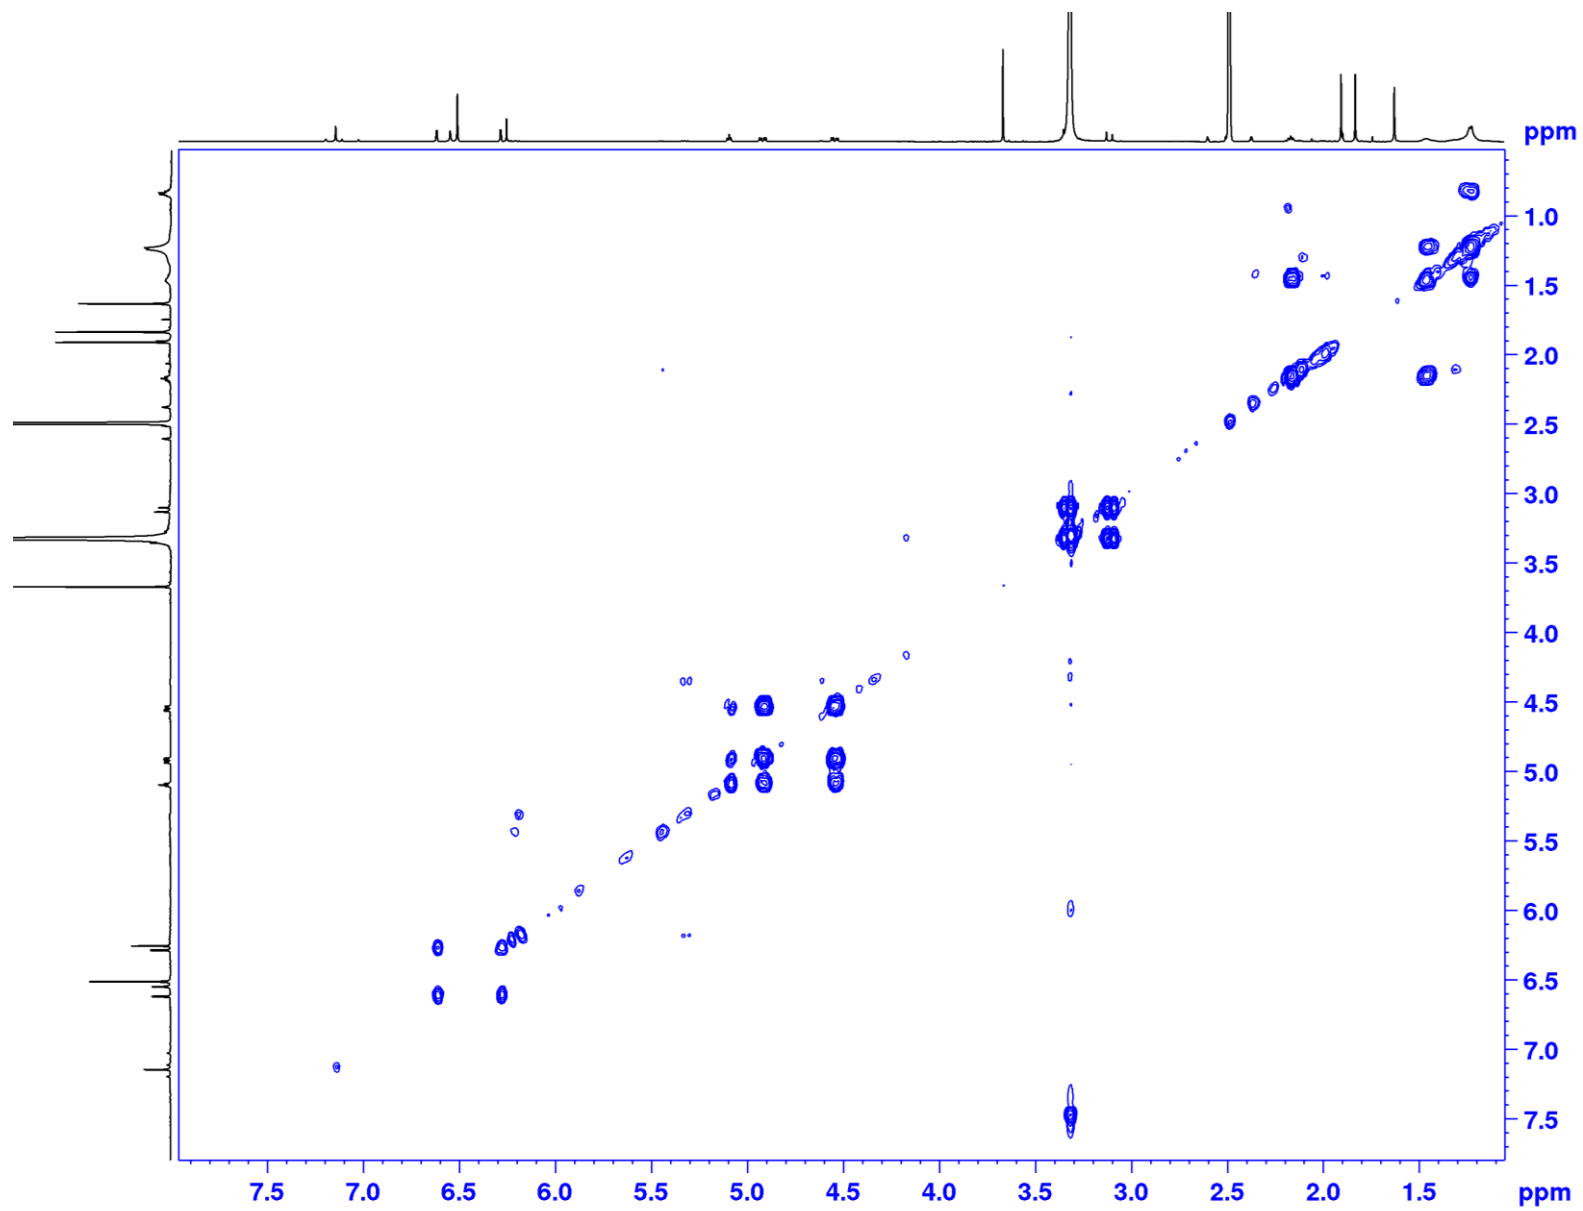

**Figure S38.**  $^1\text{H}$ - $^1\text{H}$  COSY NMR spectrum (600 MHz,  $\text{DMSO-}d_6$ ) of (+)-ABX-G (**8**)

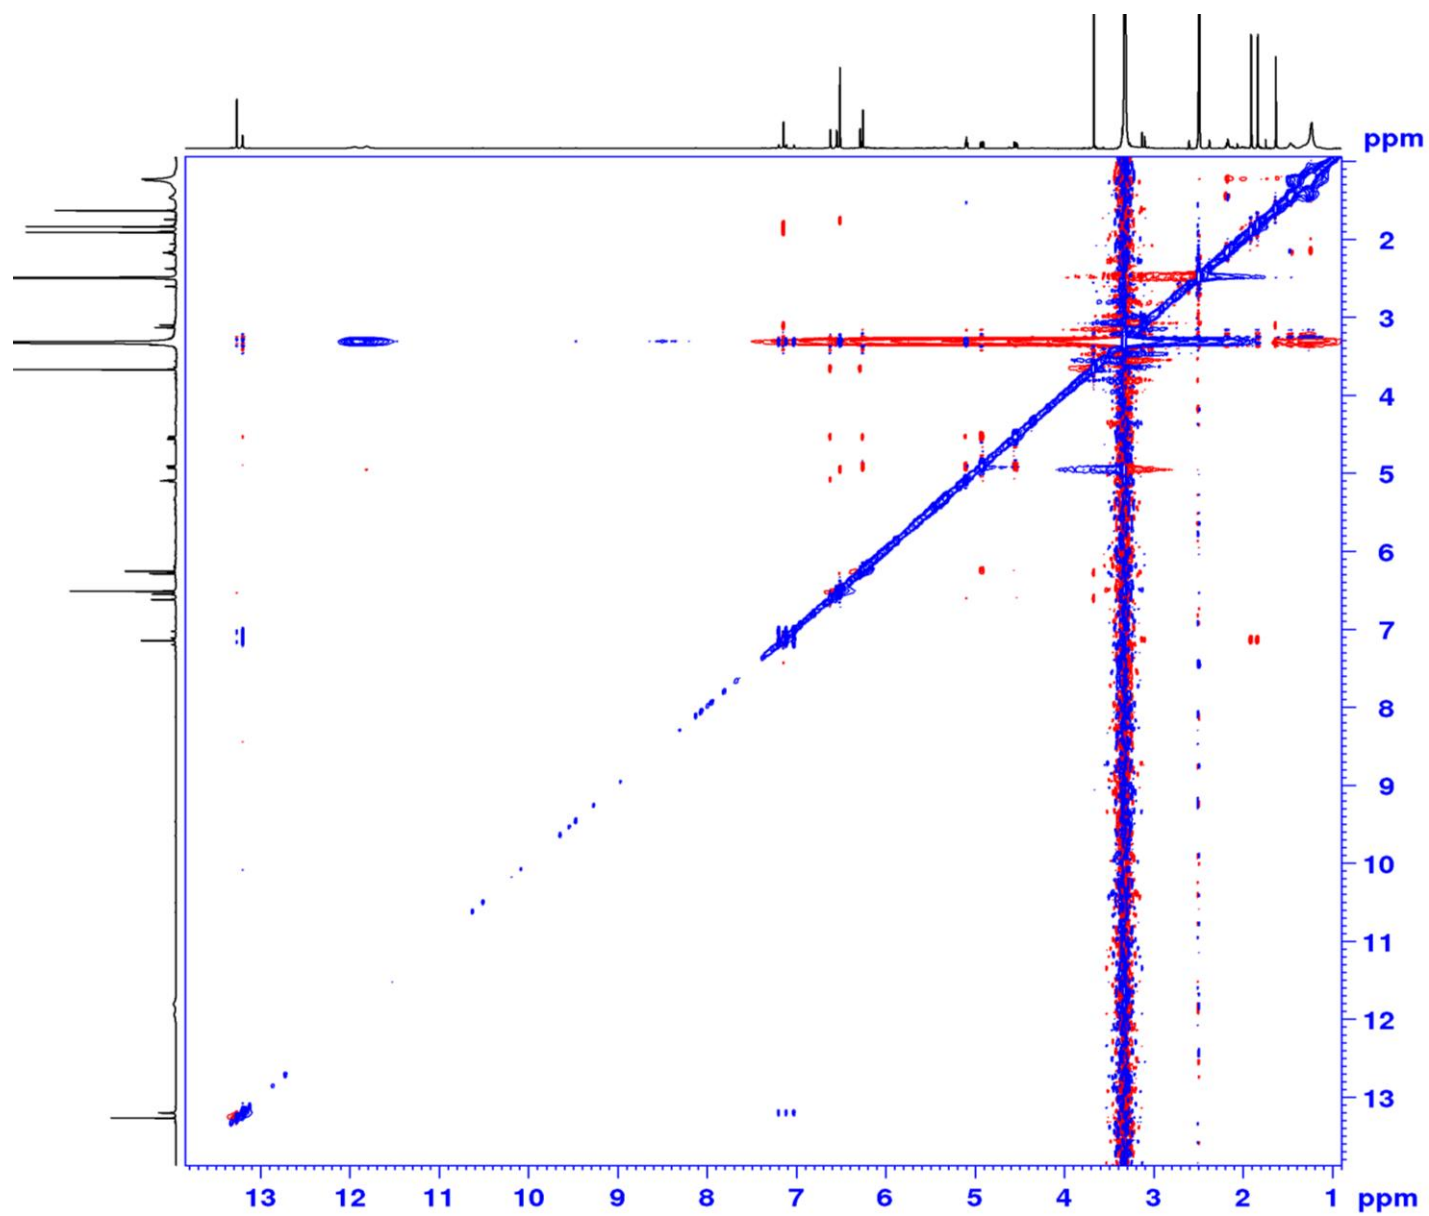

**Figure S39.** <sup>1</sup>H-<sup>1</sup>H ROESY NMR spectrum (600 MHz, DMSO-*d*<sub>6</sub>) of (+)-ABX-G (**8**)

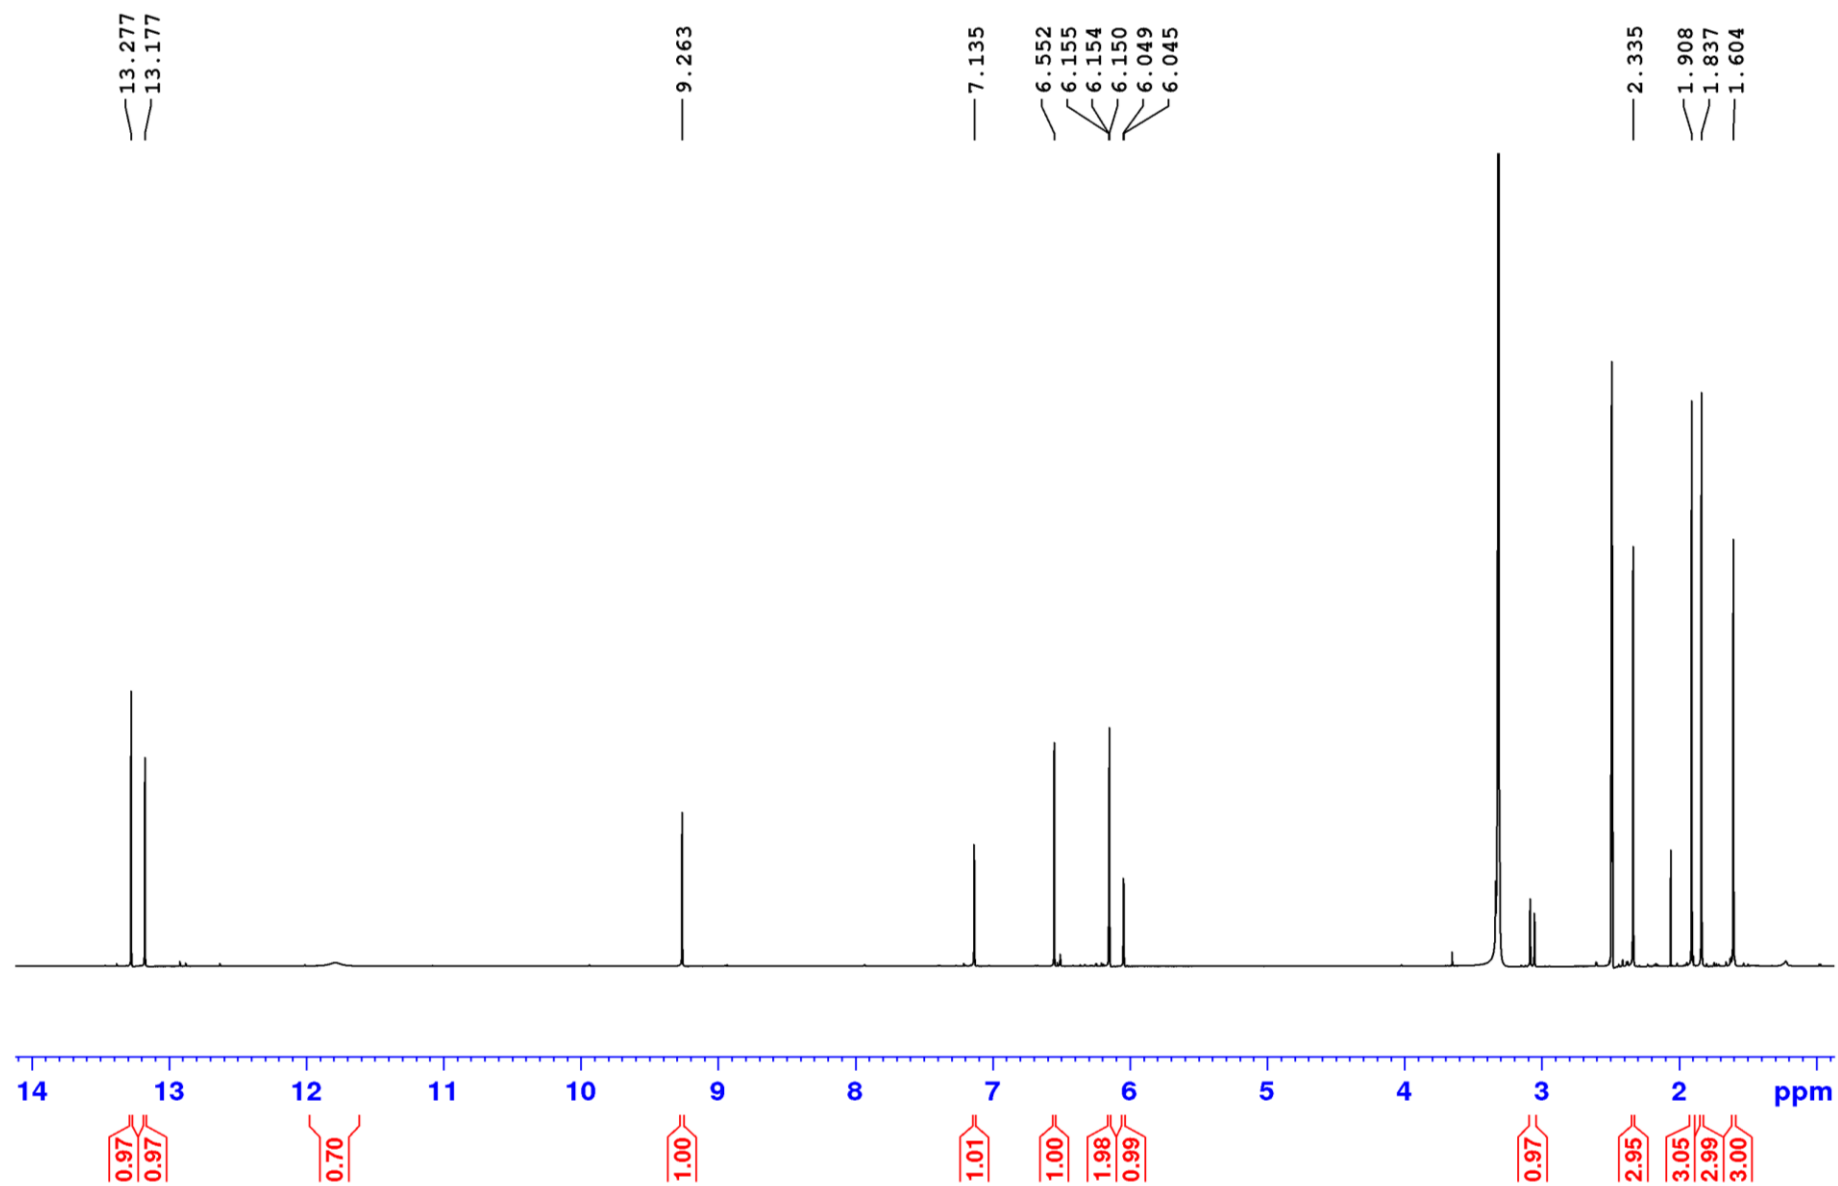

Figure S40.  $^1\text{H}$  NMR spectrum (600 MHz,  $\text{DMSO-}d_6$ ) of (-)-ABX-K (9)

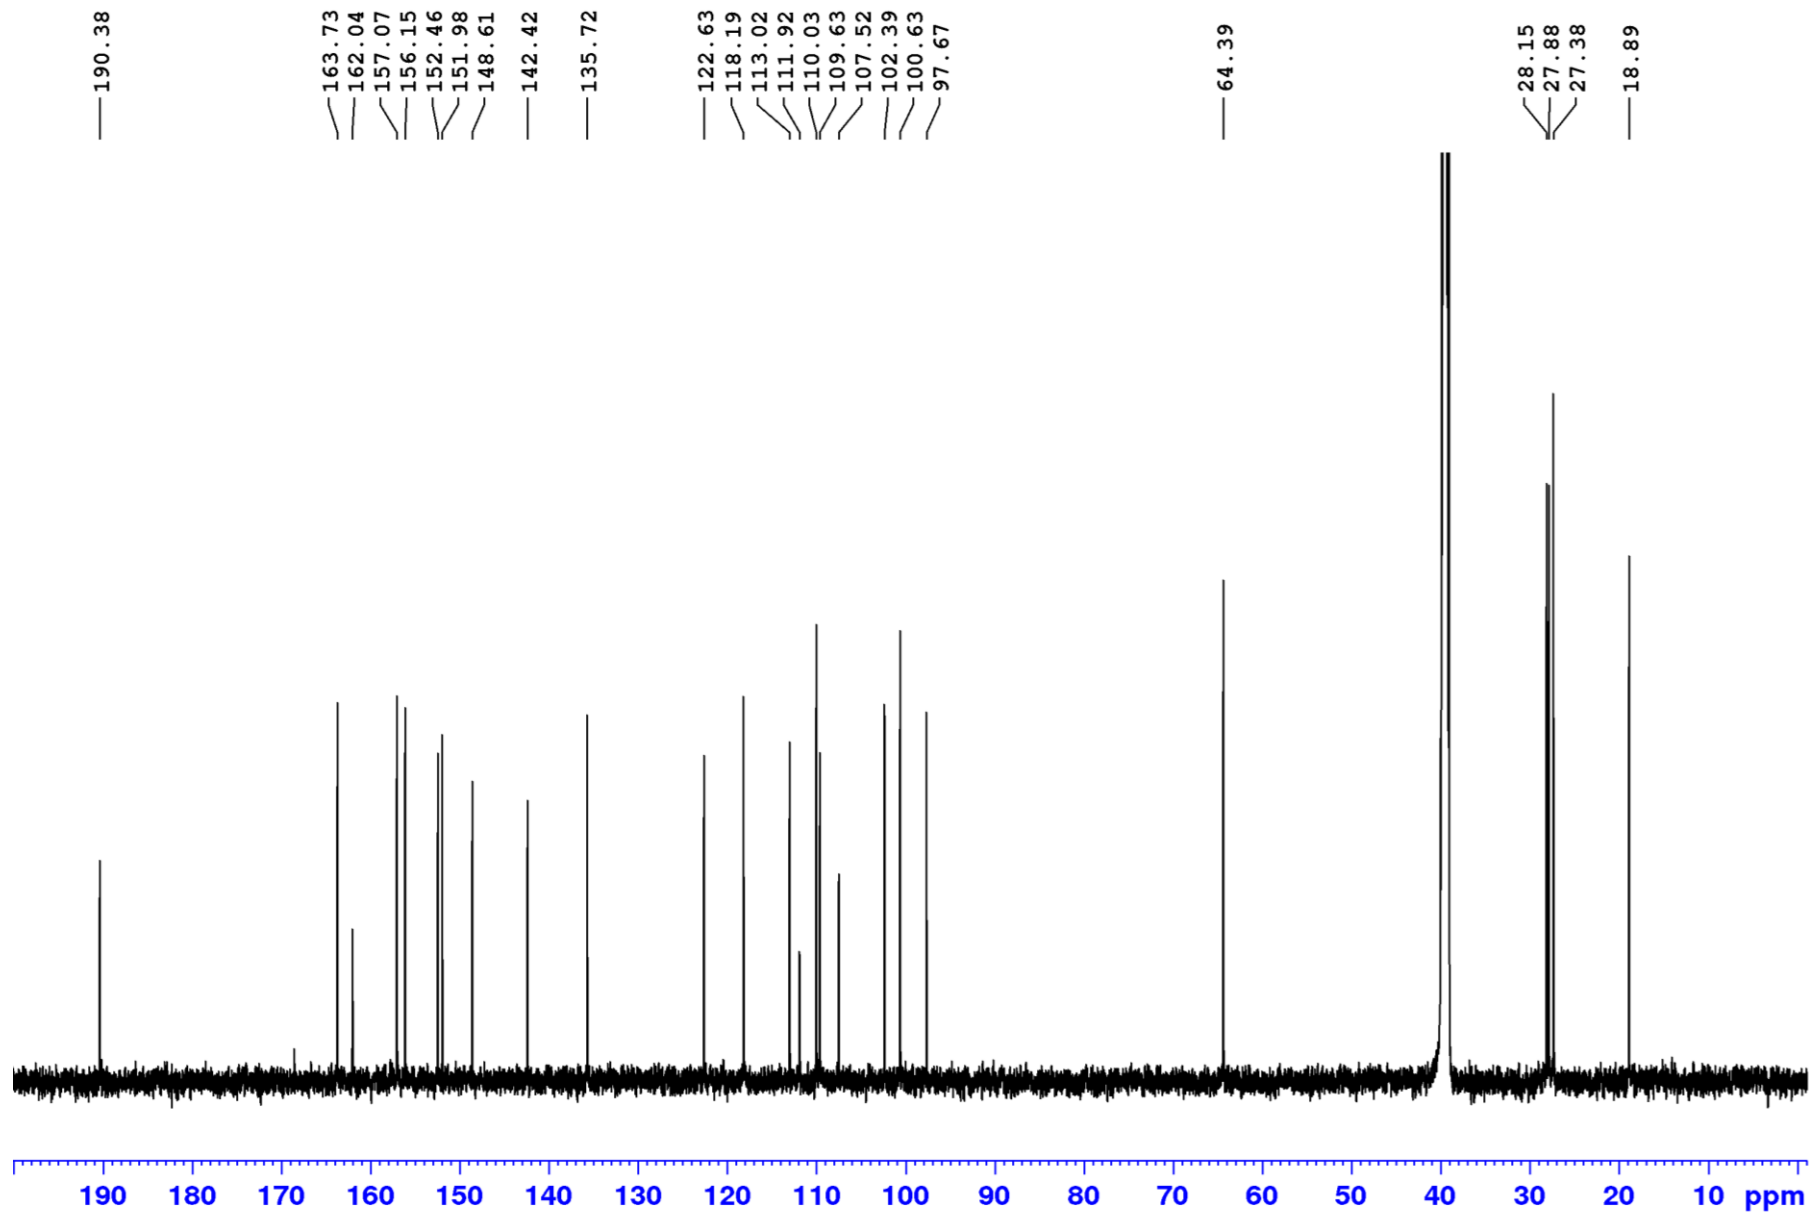

Figure S41.  $^{13}\text{C}$  NMR spectrum (150 MHz,  $\text{DMSO-}d_6$ ) of (-)-ABX-K (**9**)

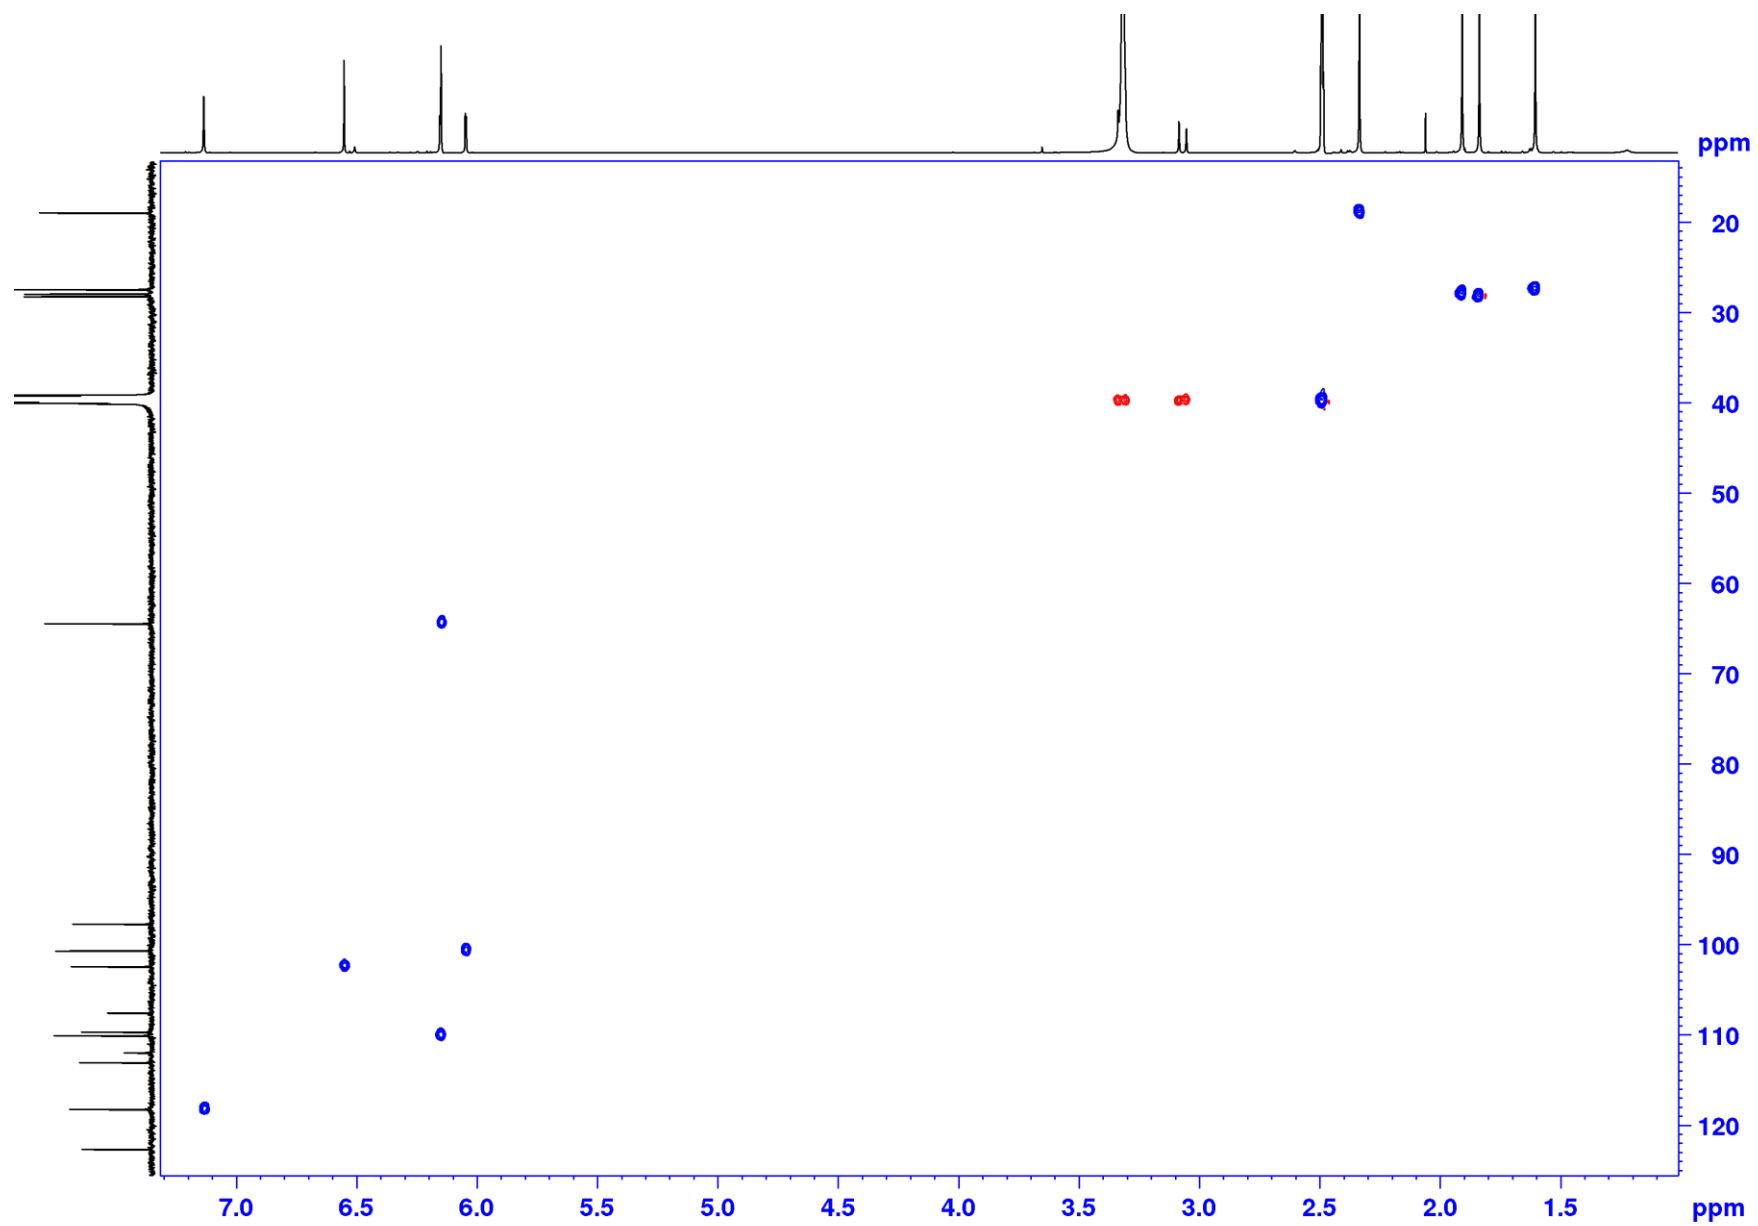

**Figure S42.**  $^1\text{H}$ - $^{13}\text{C}$  HSQC NMR spectrum (600 MHz,  $\text{DMSO-}d_6$ ) of (-)-ABX-K (**9**)

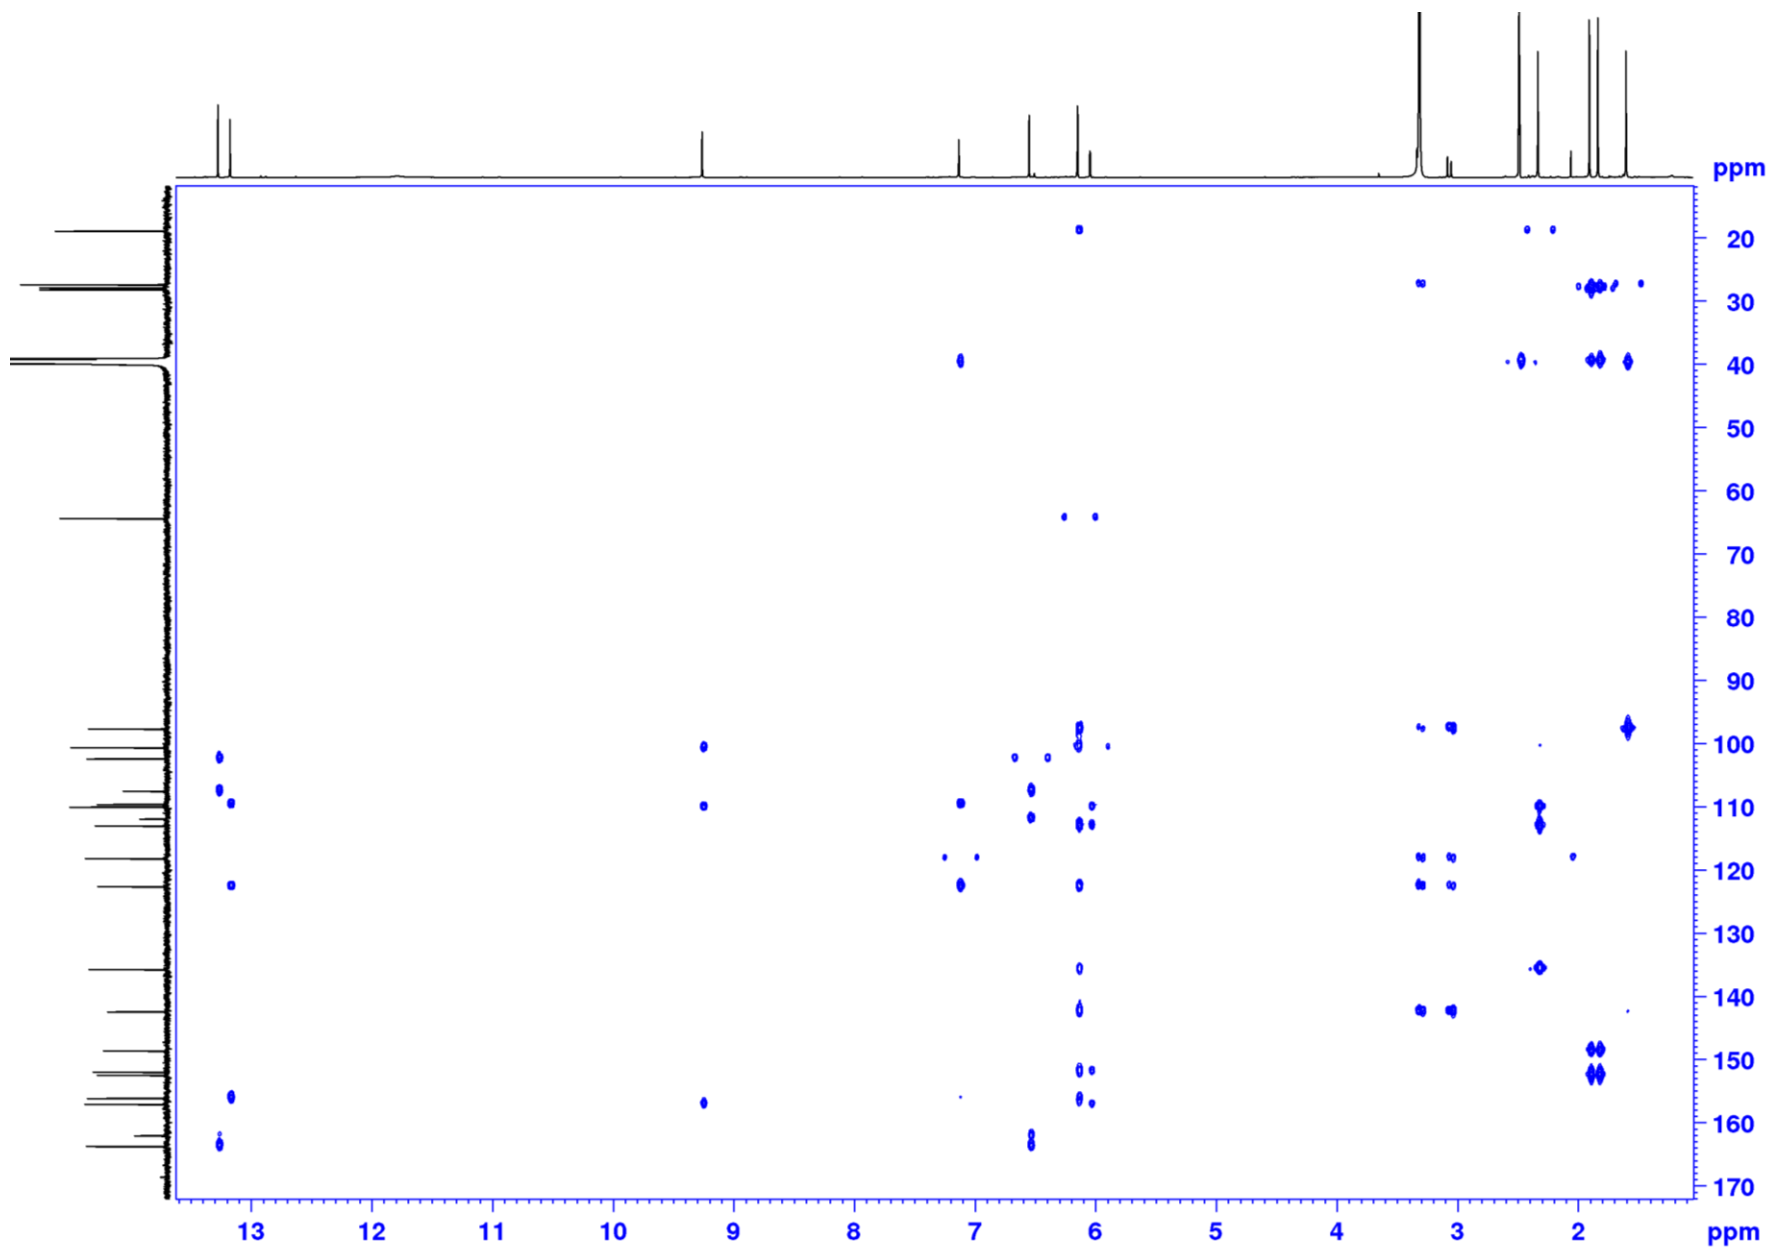

**Figure S43.**  $^1\text{H}$ - $^{13}\text{C}$  HMBC NMR spectrum (600 MHz,  $\text{DMSO-}d_6$ ) of (-)-ABX-K (**9**)

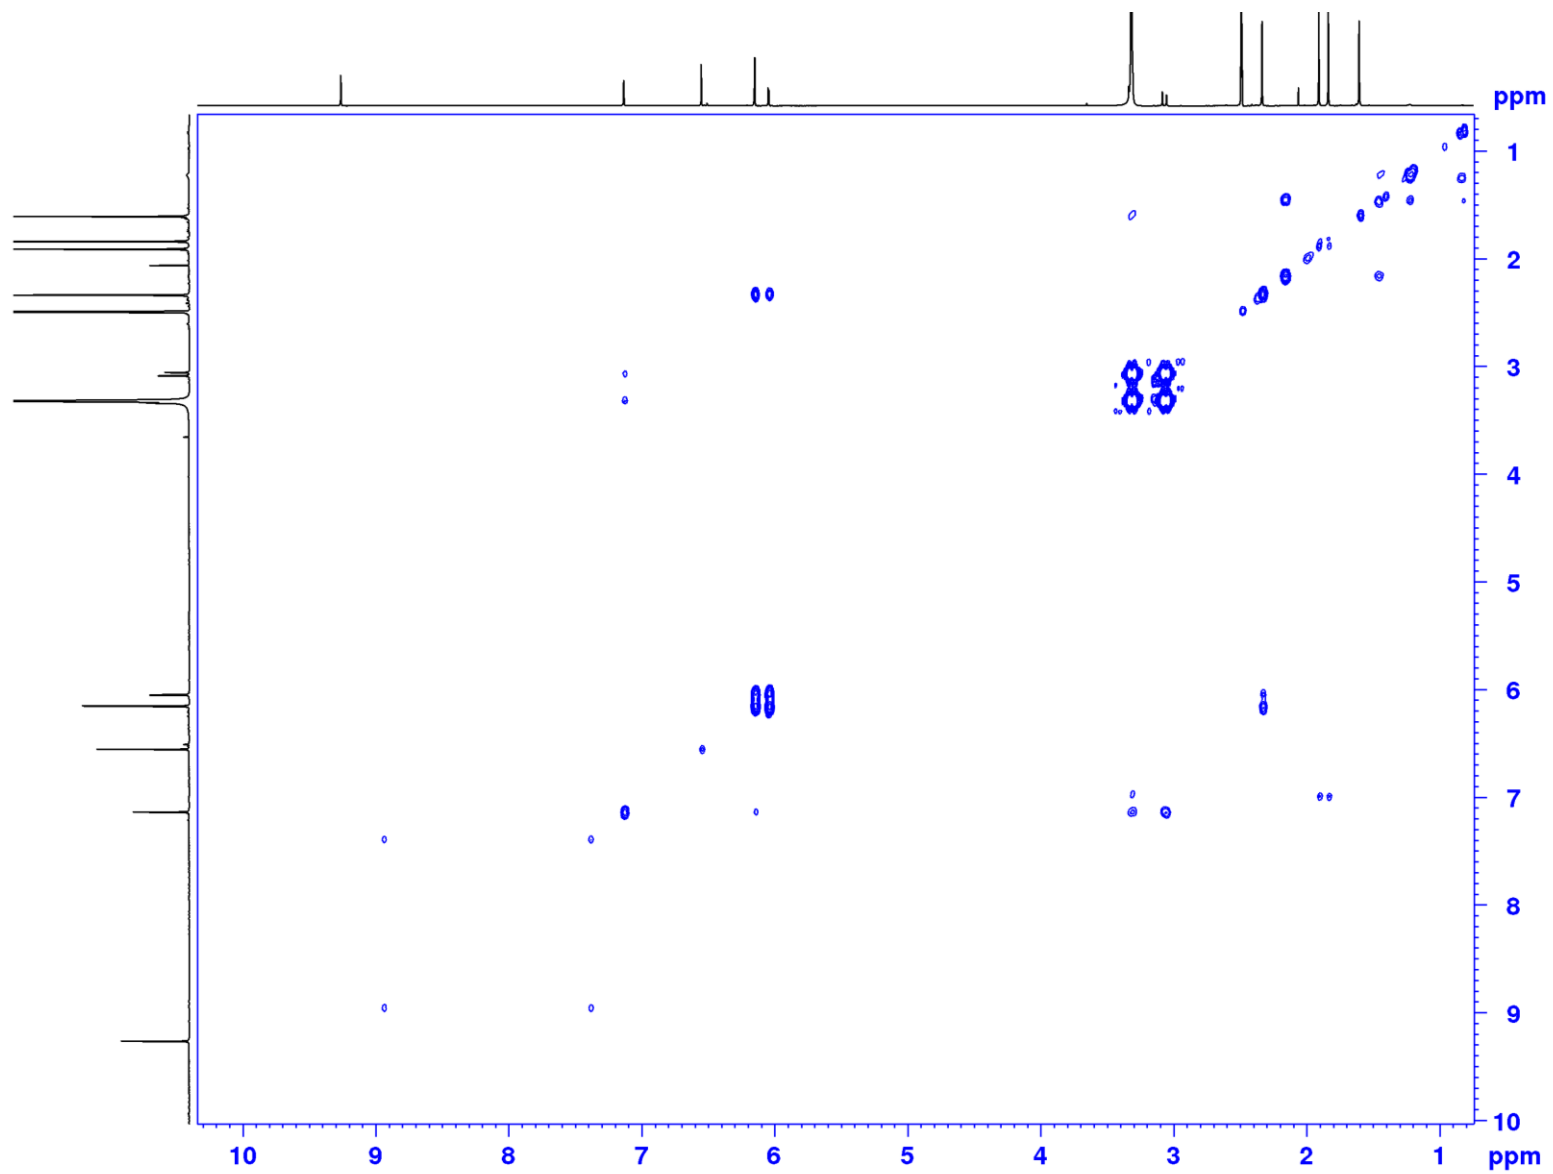

**Figure S44.**  $^1\text{H}$ - $^1\text{H}$  COSY NMR spectrum (600 MHz,  $\text{DMSO-}d_6$ ) of (-)-ABX-K (**9**)

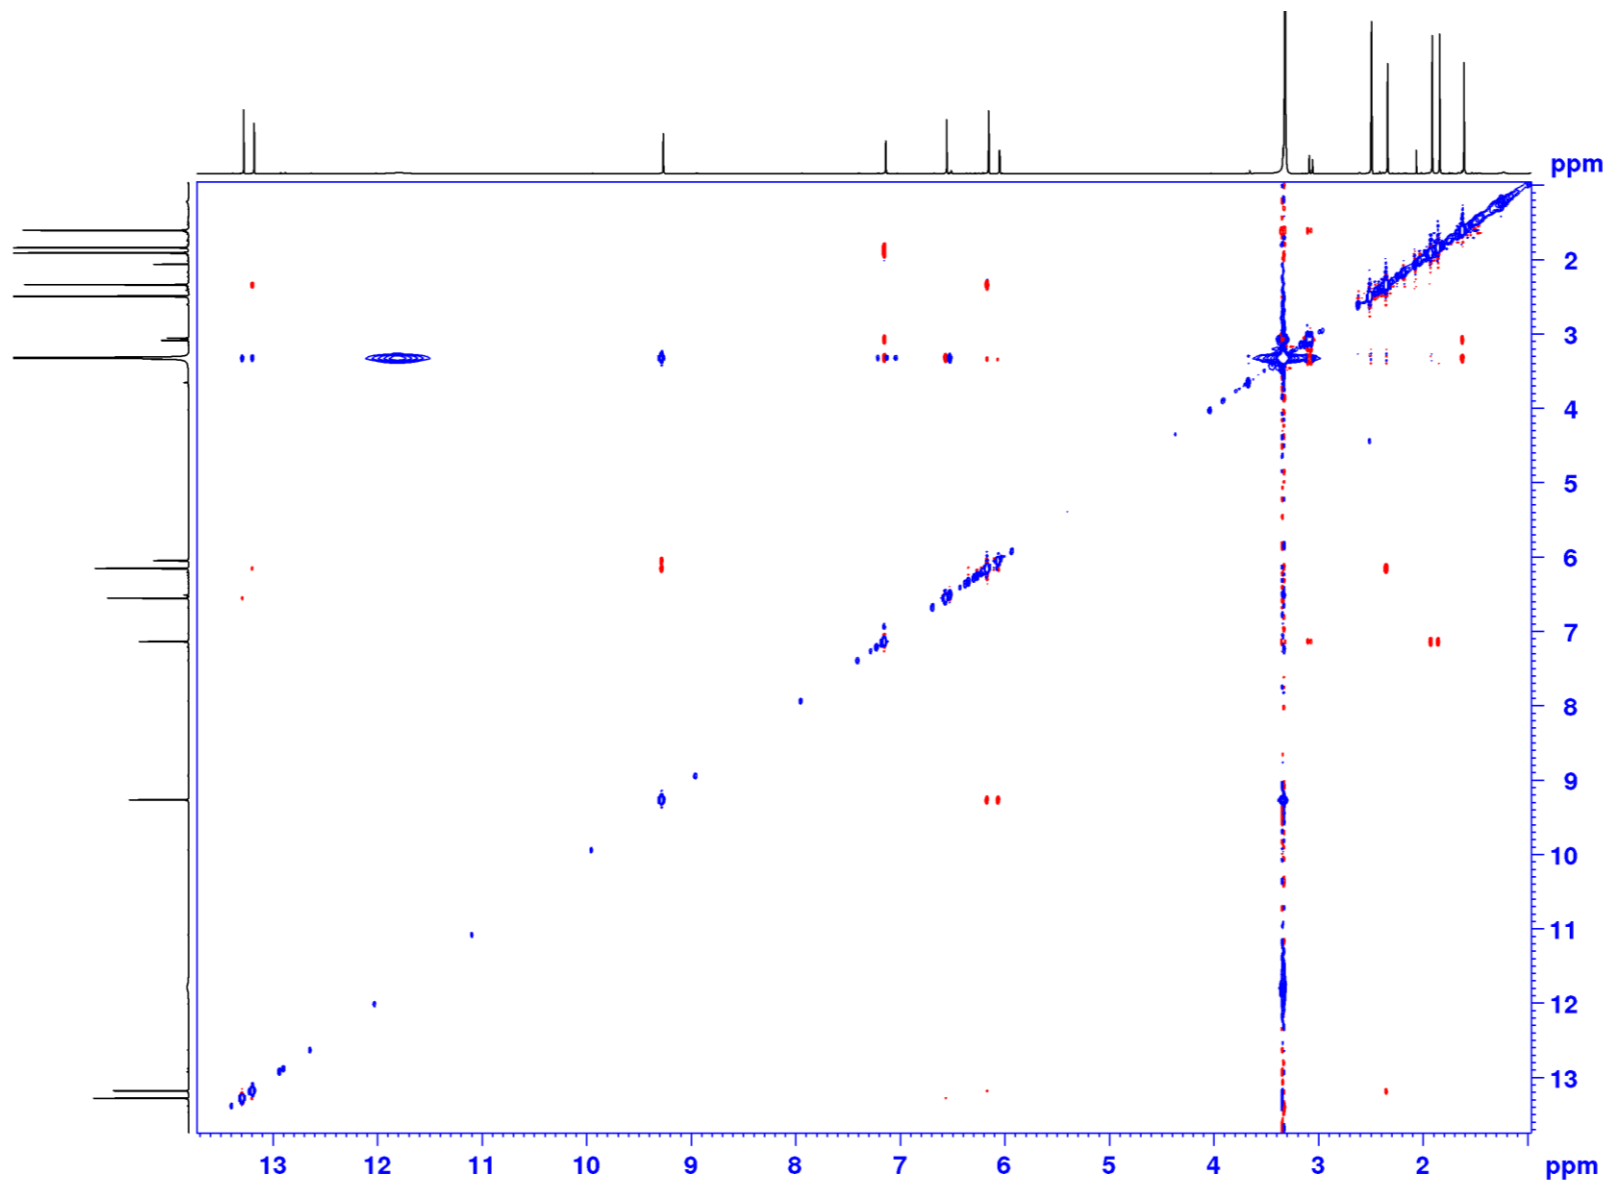

**Figure S45.**  $^1\text{H}$ - $^1\text{H}$  ROESY NMR spectrum (600 MHz,  $\text{DMSO-}d_6$ ) of (-)-ABX-K (**9**)



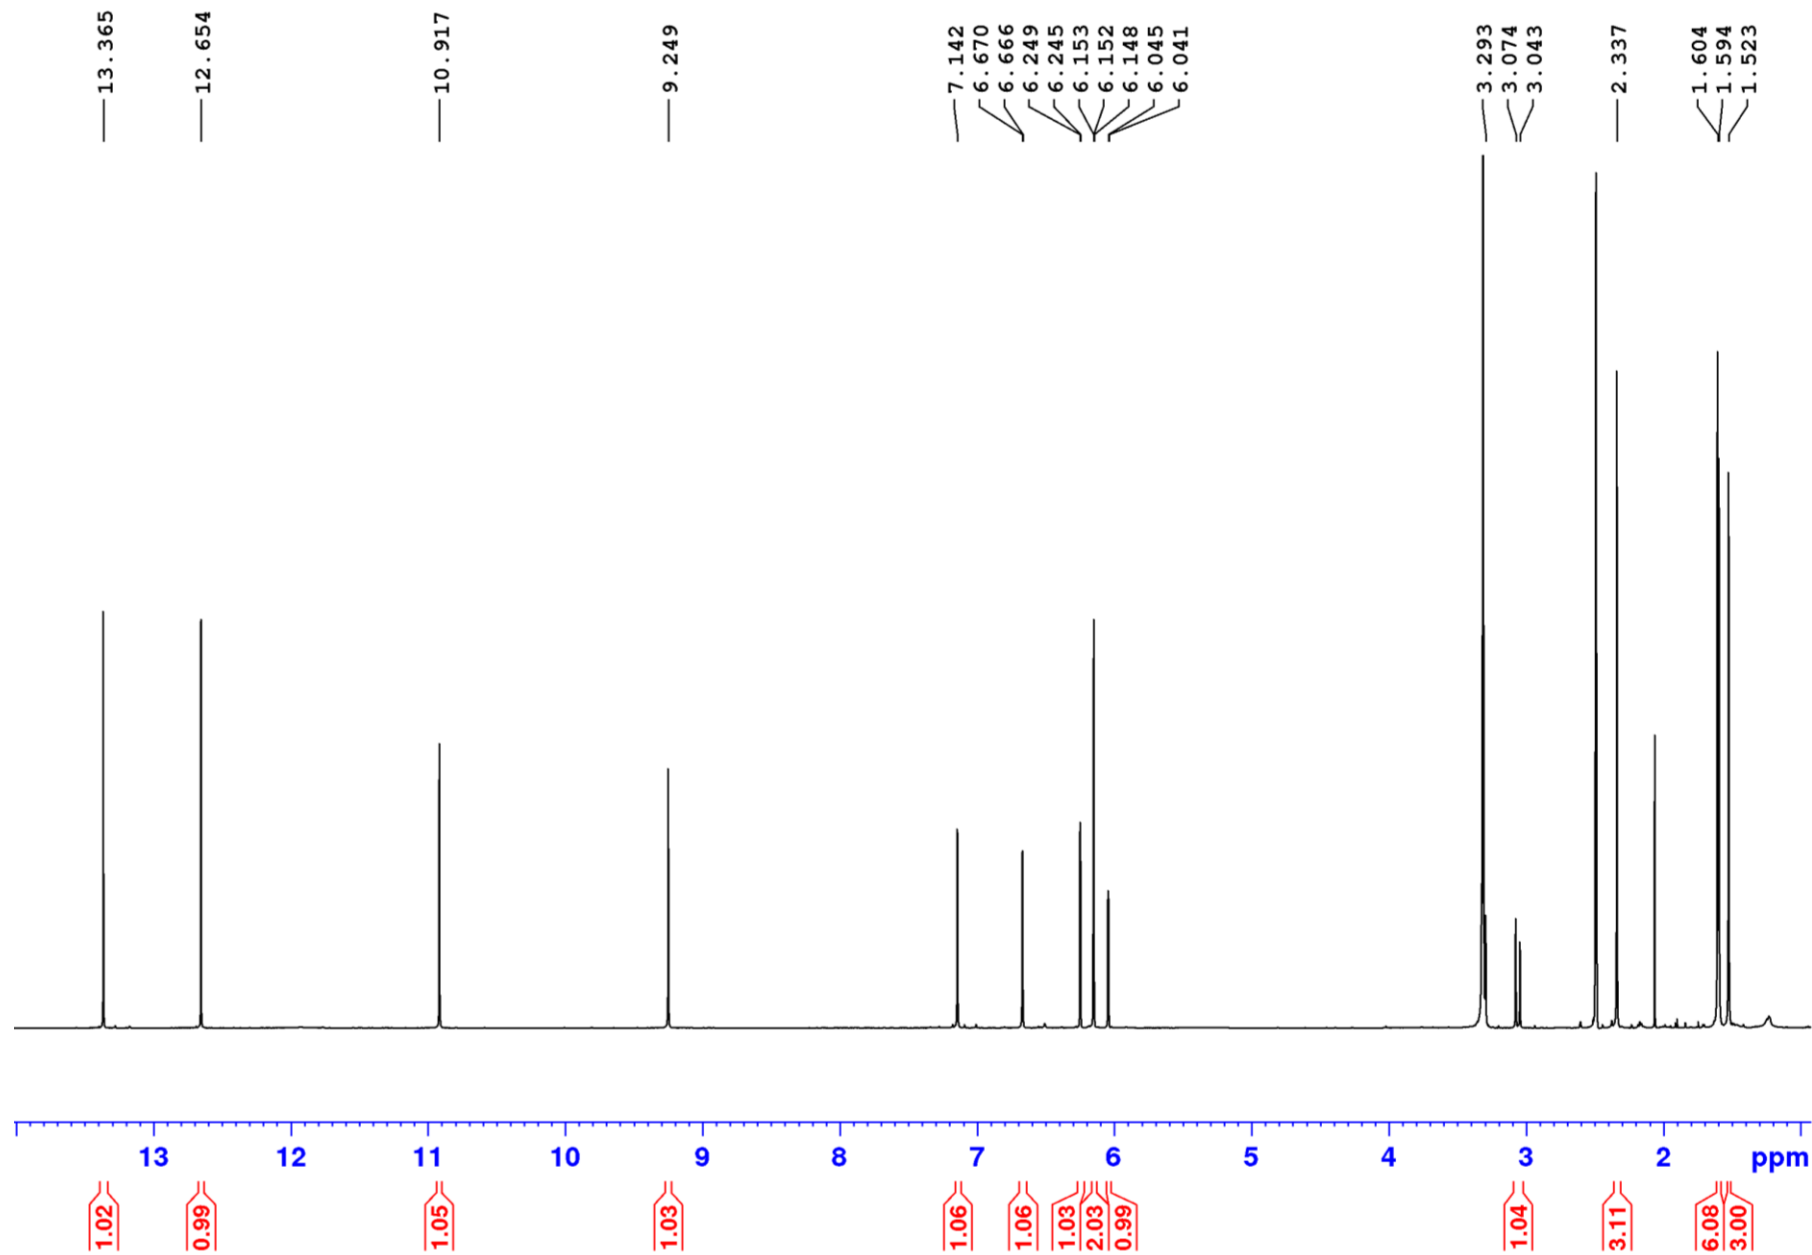

Figure S46.  $^1\text{H}$  NMR spectrum (600 MHz,  $\text{DMSO-}d_6$ ) of (-)-ABX-A (10)

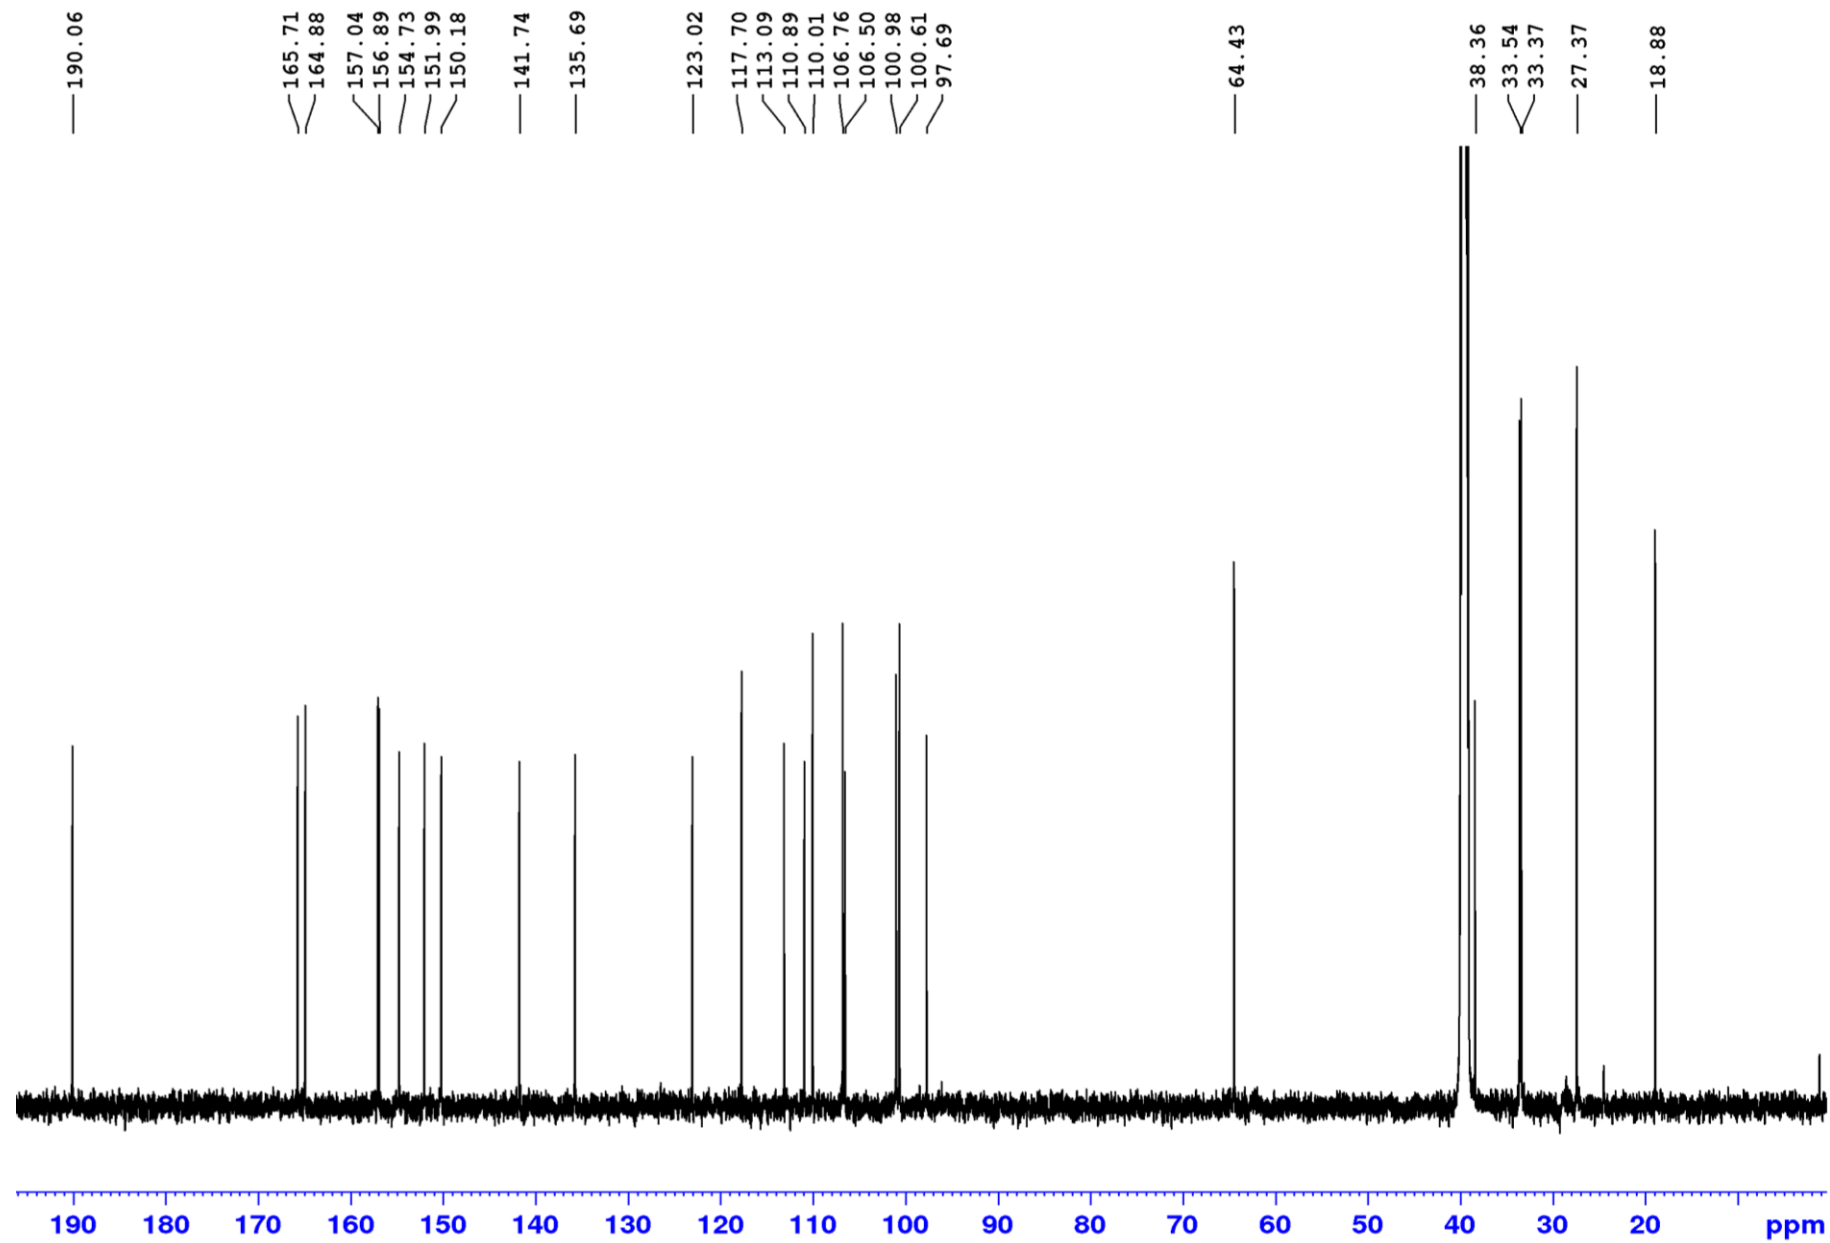

Figure S47.  $^{13}\text{C}$  NMR spectrum (150 MHz,  $\text{DMSO-}d_6$ ) of (-)-ABX-A (**10**)

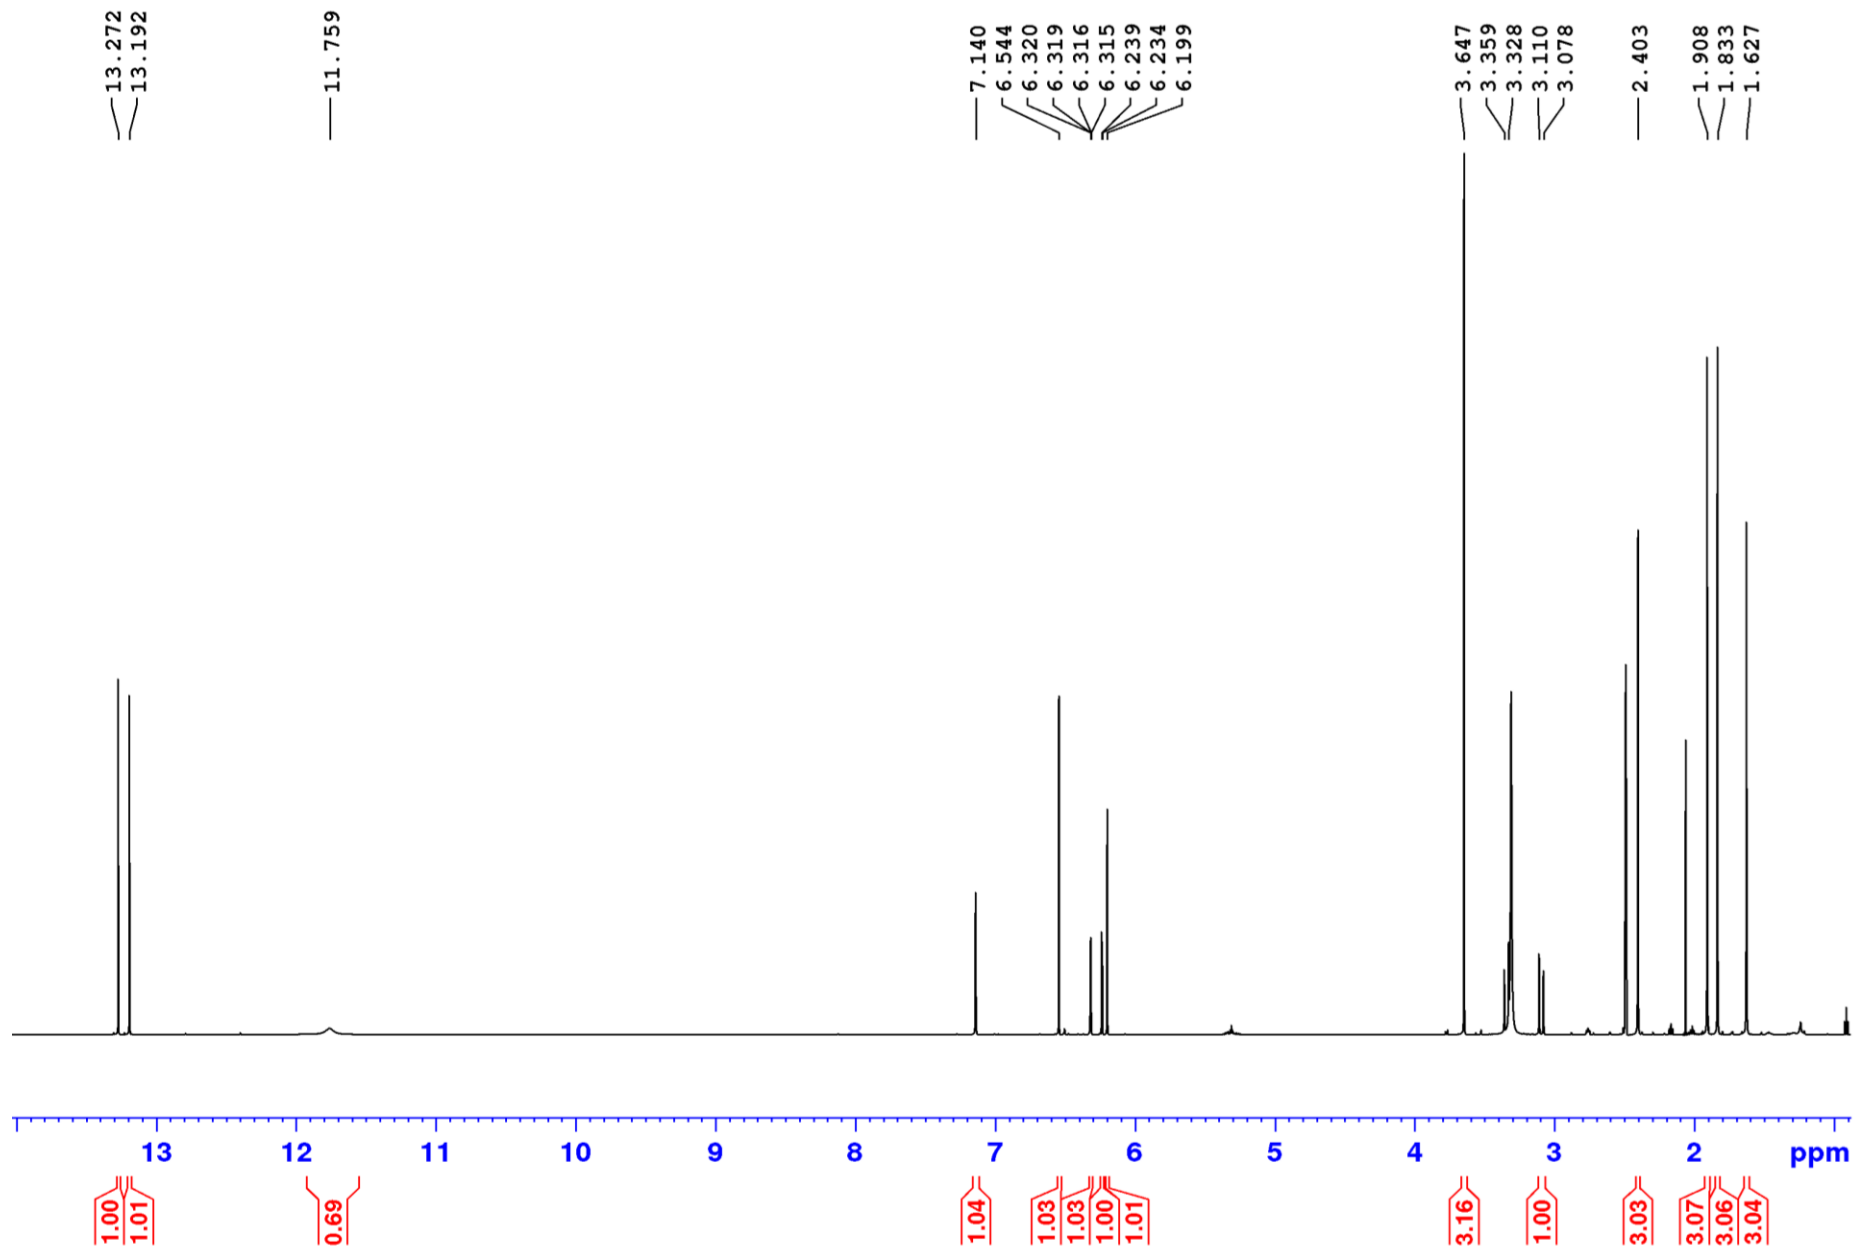

Figure S48.  $^1\text{H}$  NMR spectrum (600 MHz,  $\text{DMSO-}d_6$ ) of (-)-ABX-B (11)

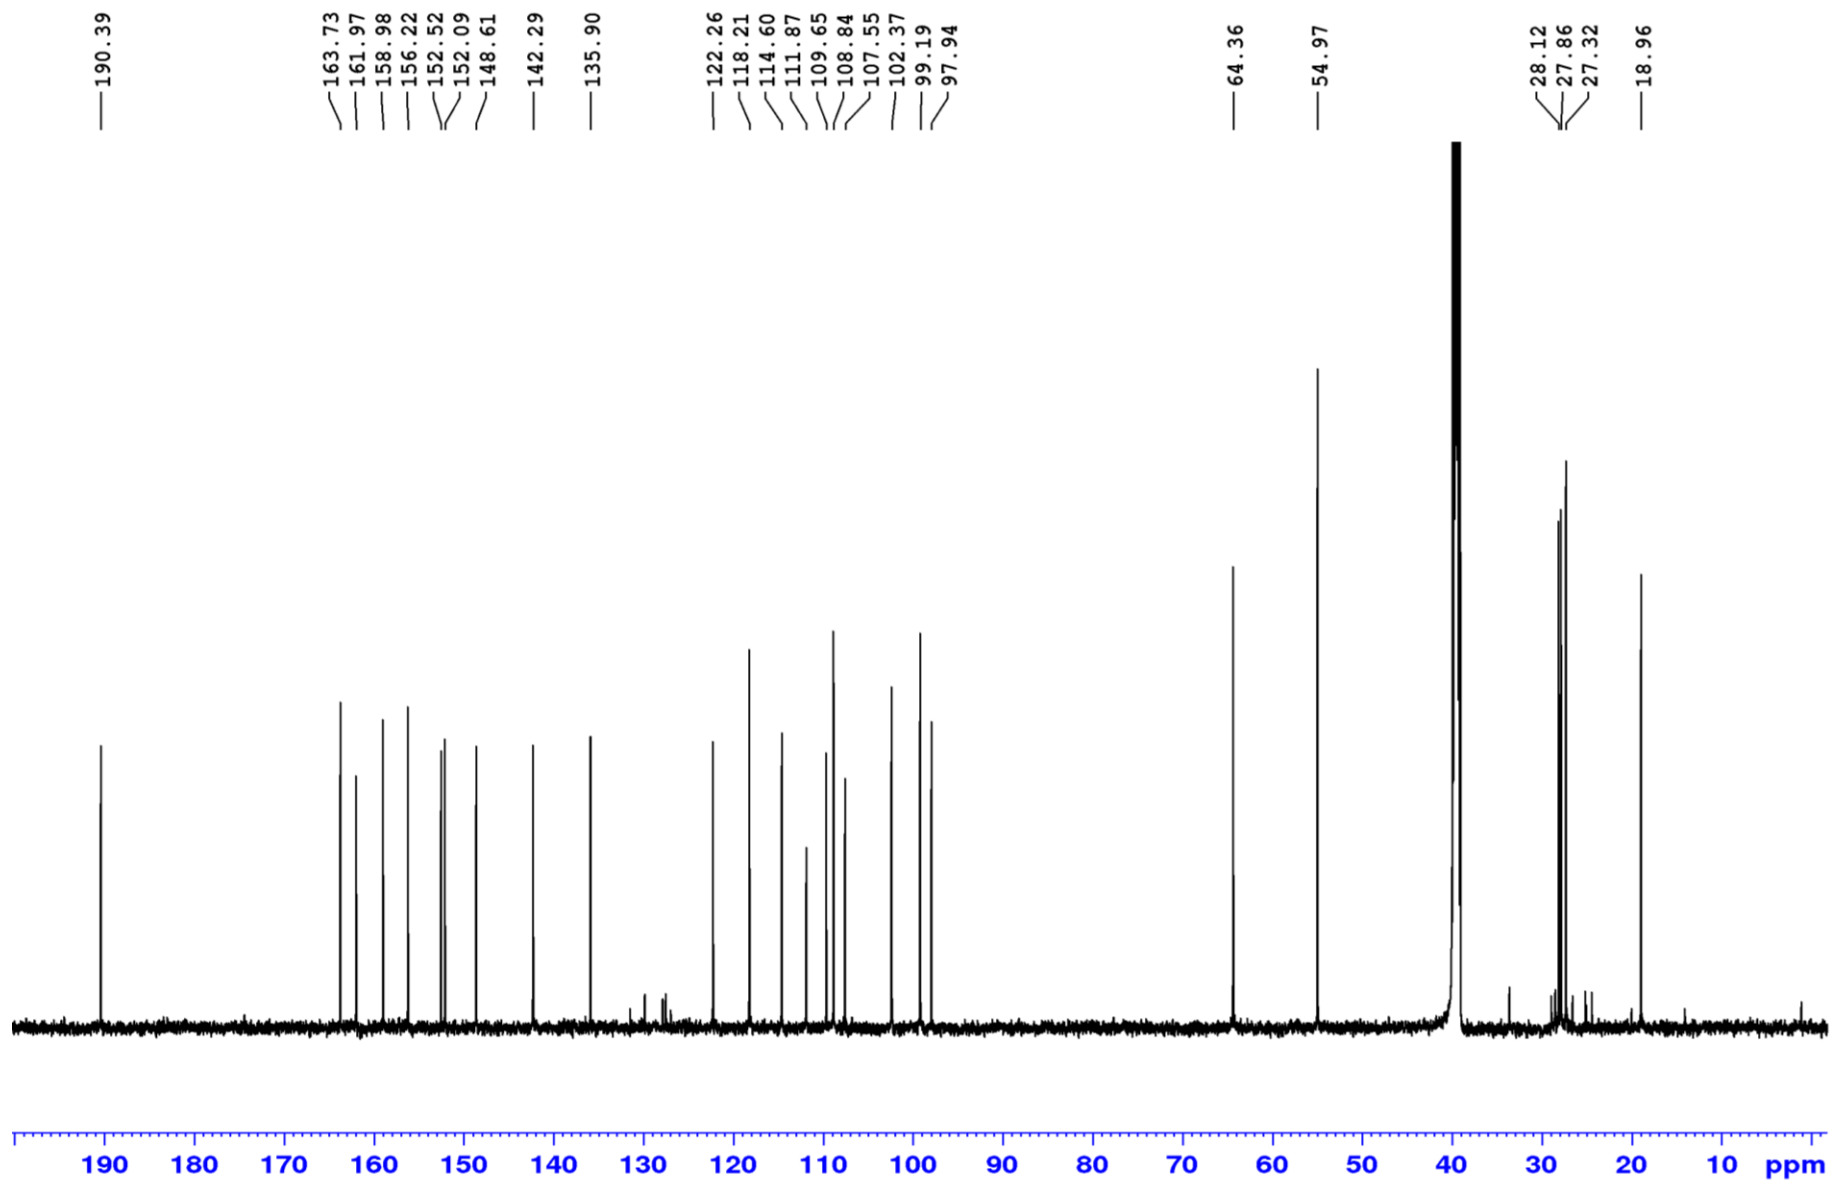

Figure S49.  $^{13}\text{C}$  NMR spectrum (150 MHz,  $\text{DMSO-}d_6$ ) of (-)-ABX-B (**11**)

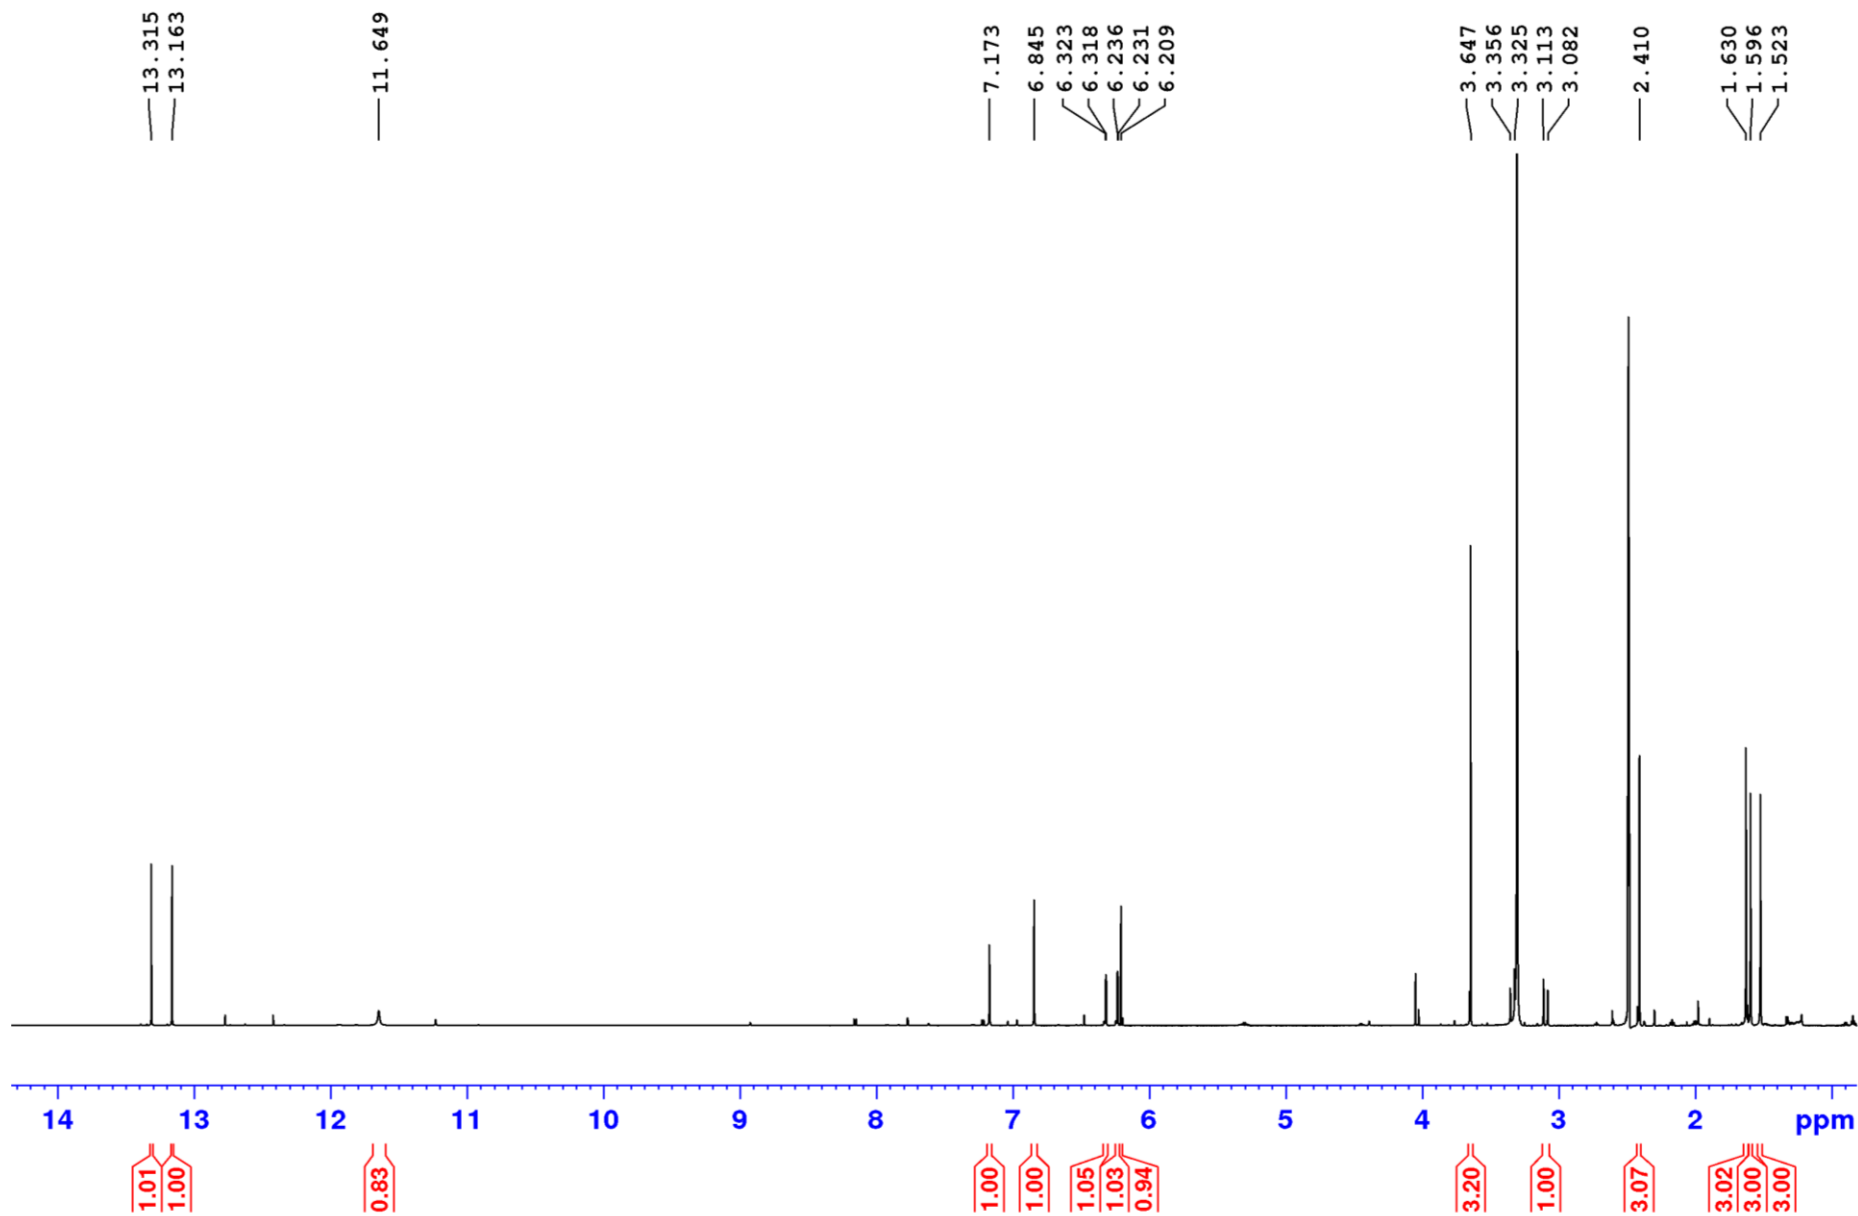

**Figure S50.**  $^1\text{H}$  NMR spectrum (600 MHz,  $\text{DMSO-}d_6$ ) of (-)-ABX-C (**12**)

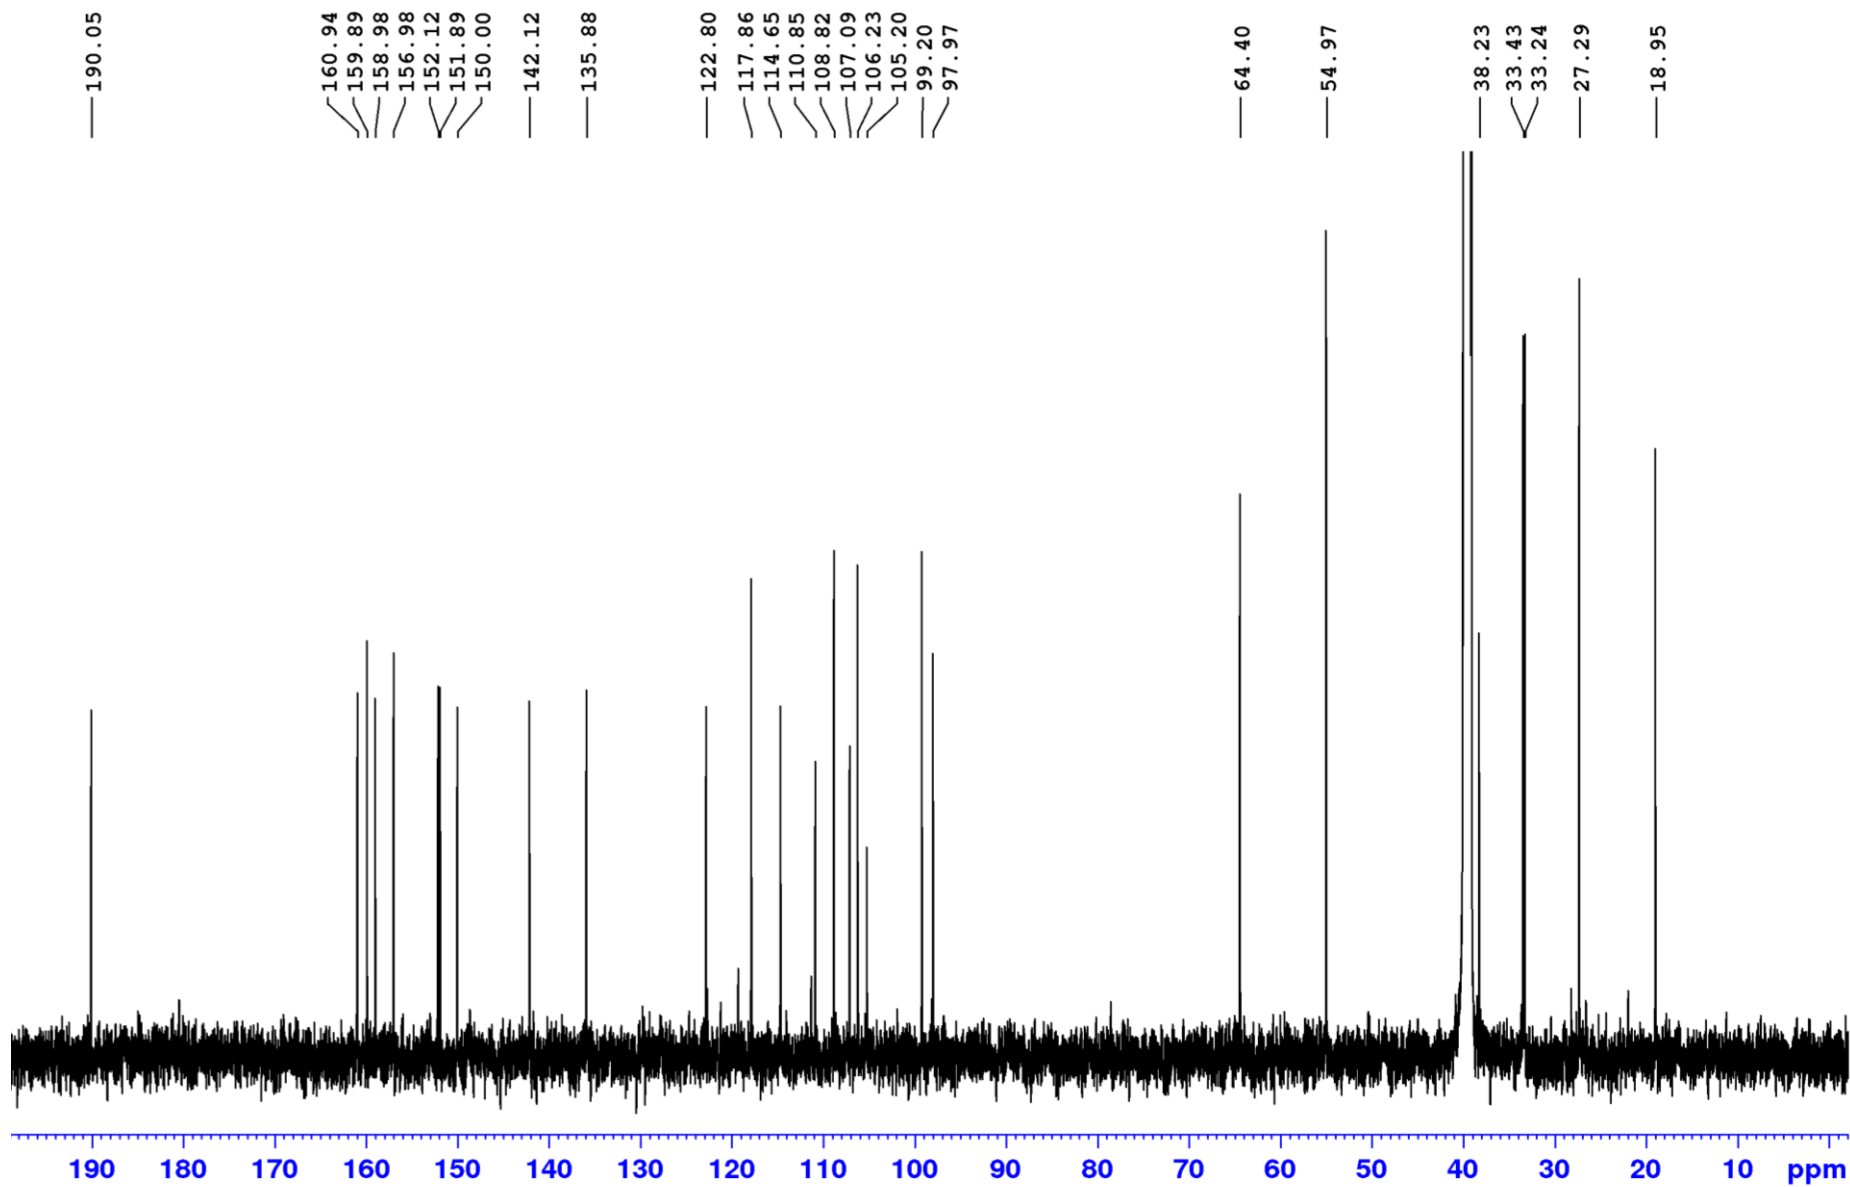

Figure S51.  $^{13}\text{C}$  NMR spectrum (150 MHz,  $\text{DMSO-}d_6$ ) of (-)-ABX-C (**12**)

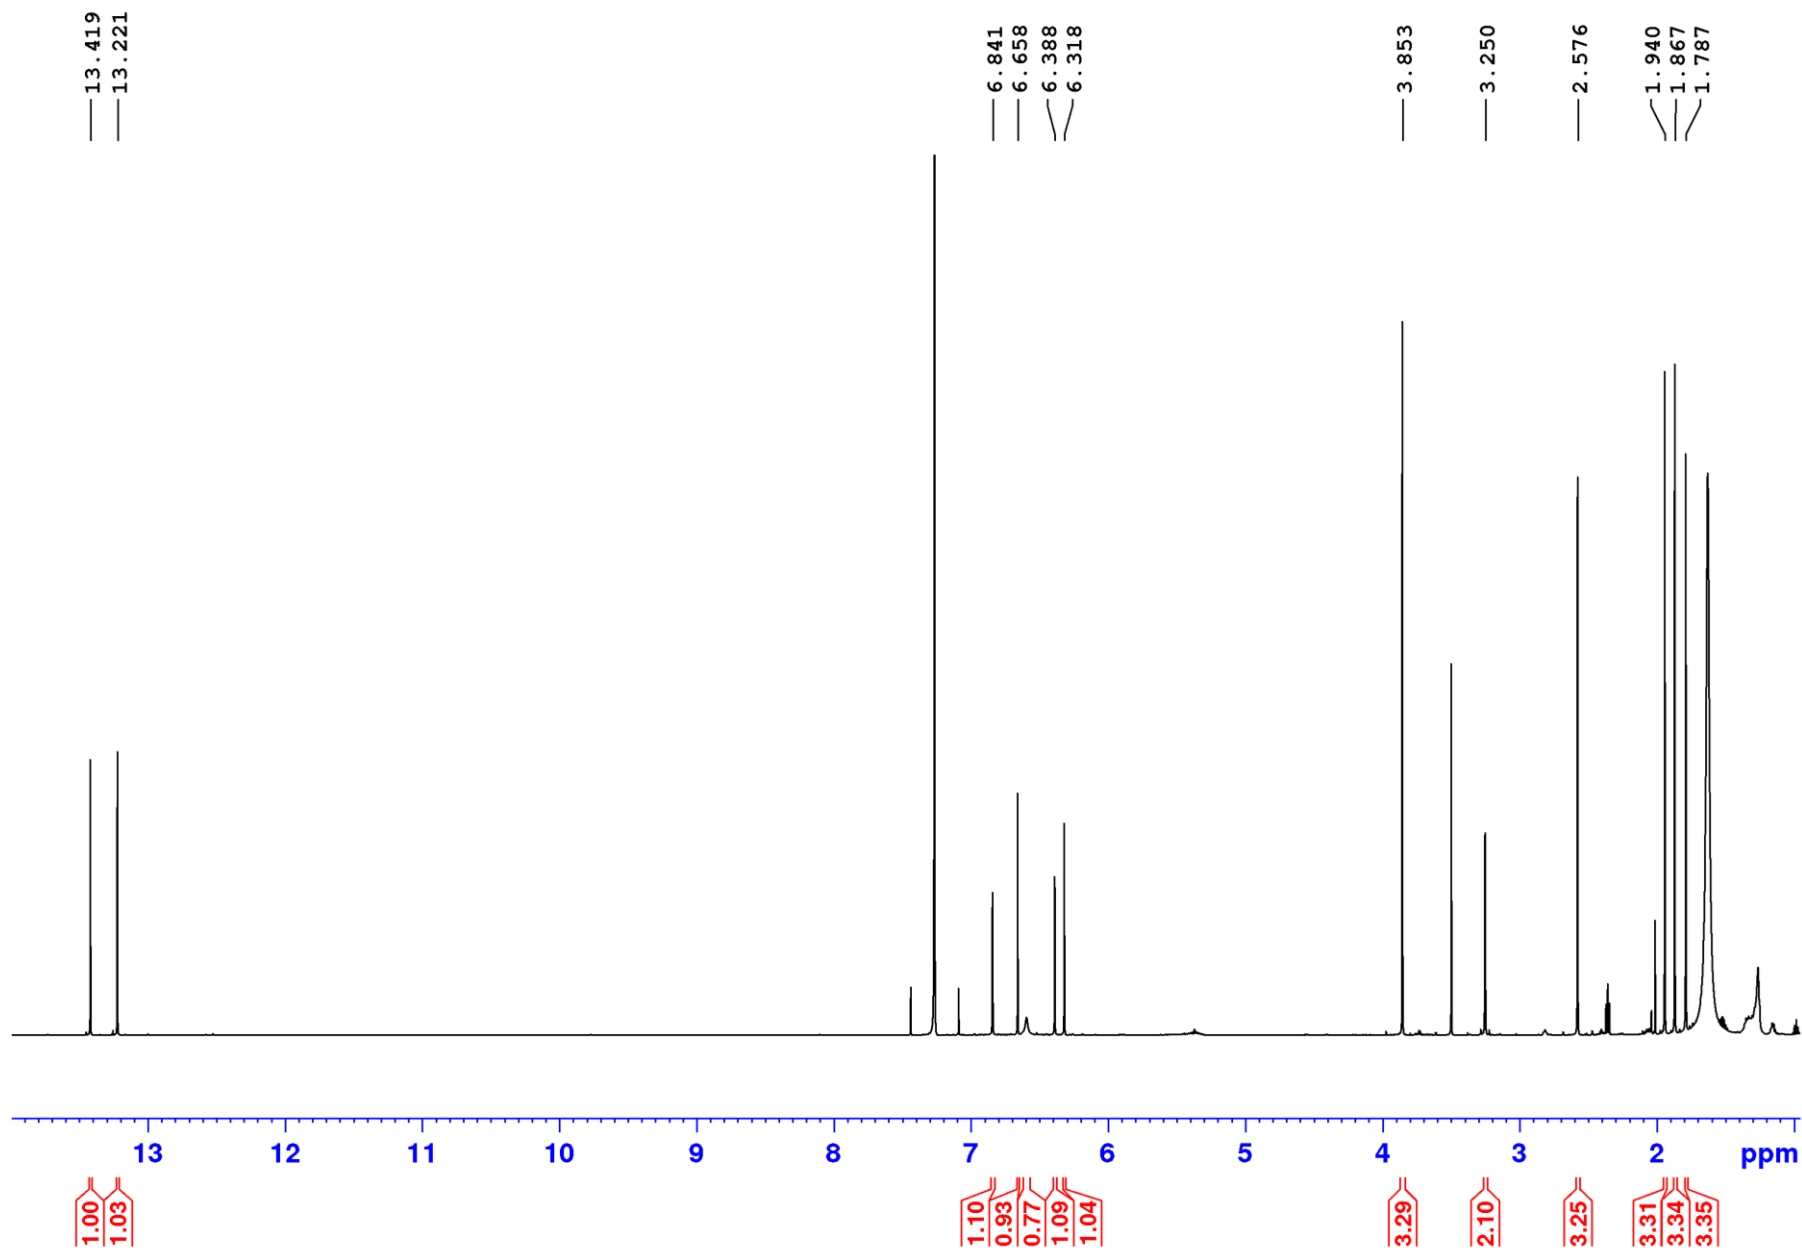

**Figure S52.** <sup>1</sup>H NMR spectrum (600 MHz, CDCl<sub>3</sub>) of (-)-ABX-D (13)

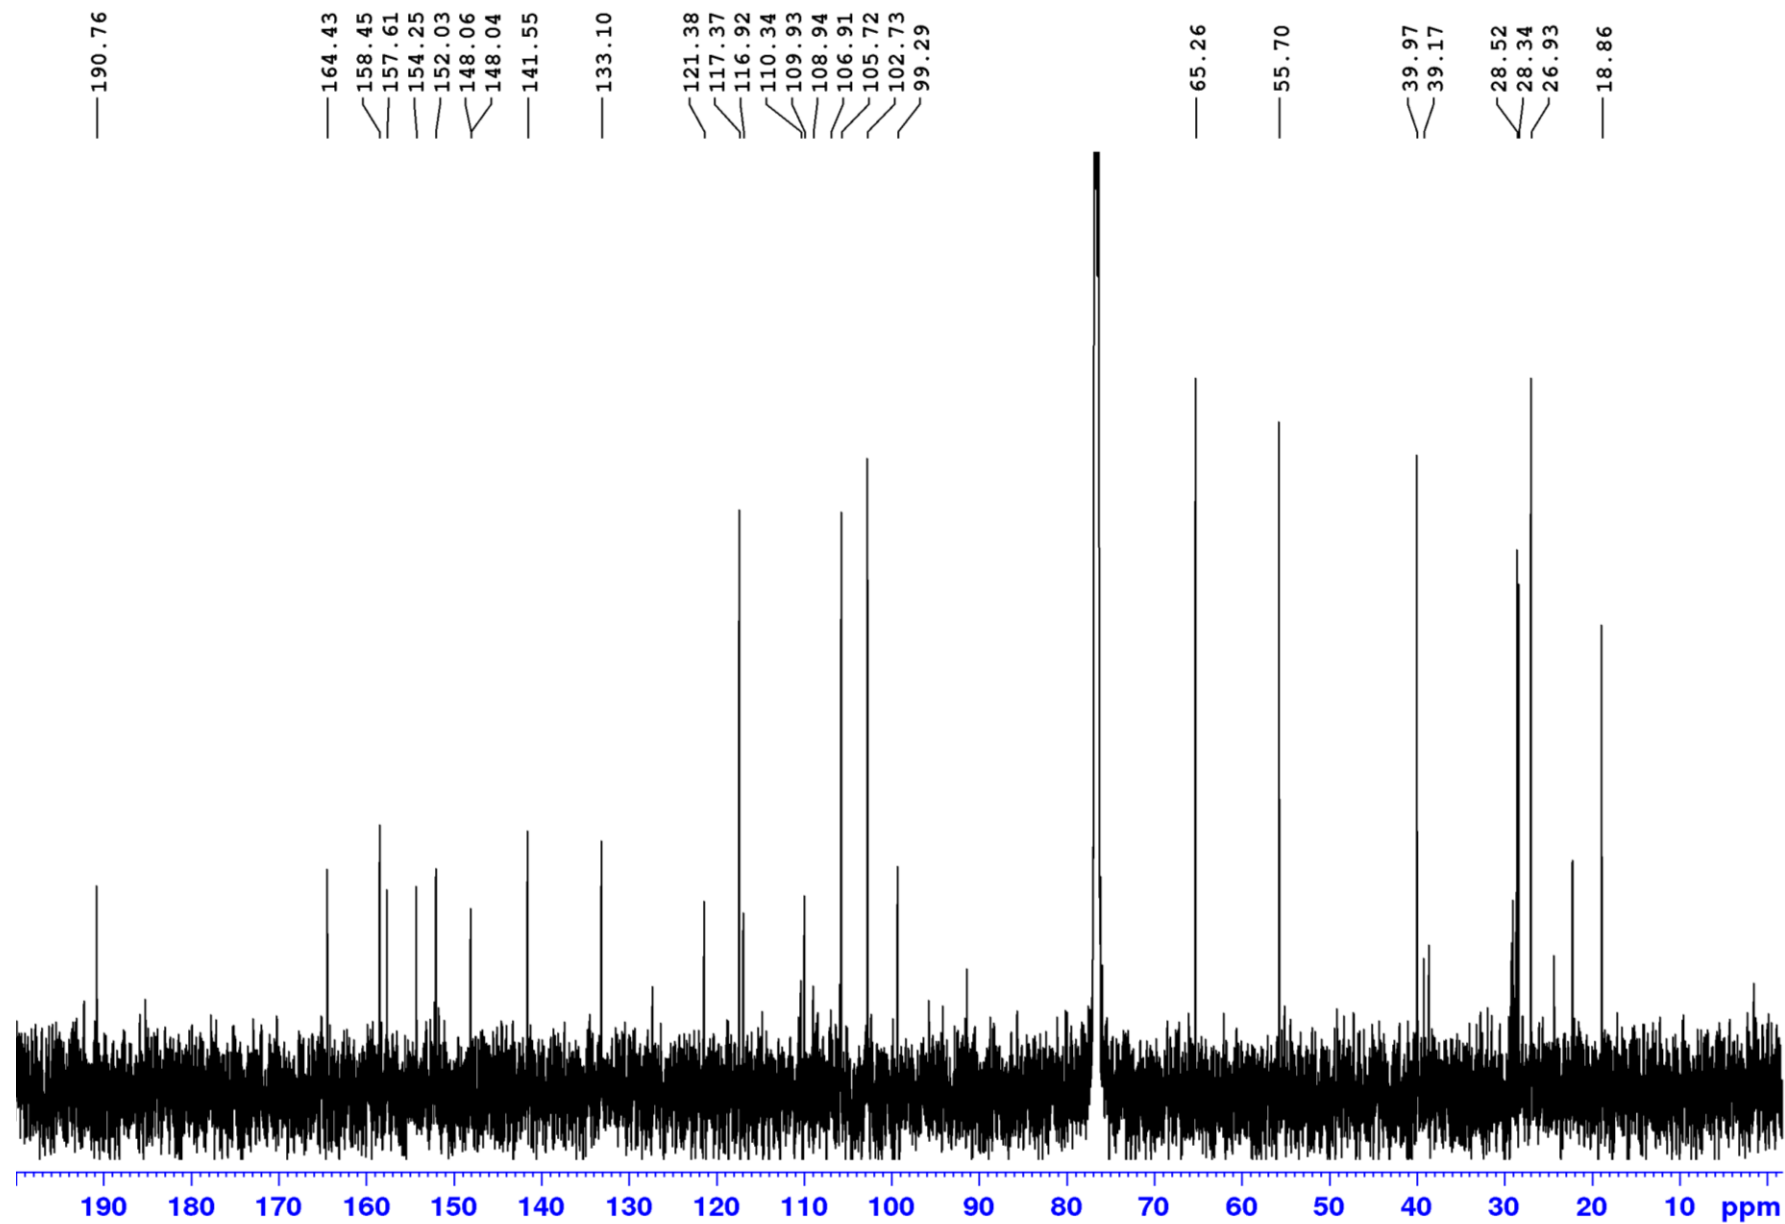

Figure S53.  $^{13}\text{C}$  NMR spectrum (150 MHz,  $\text{CDCl}_3$ ) of (-)-ABX-D (**13**)



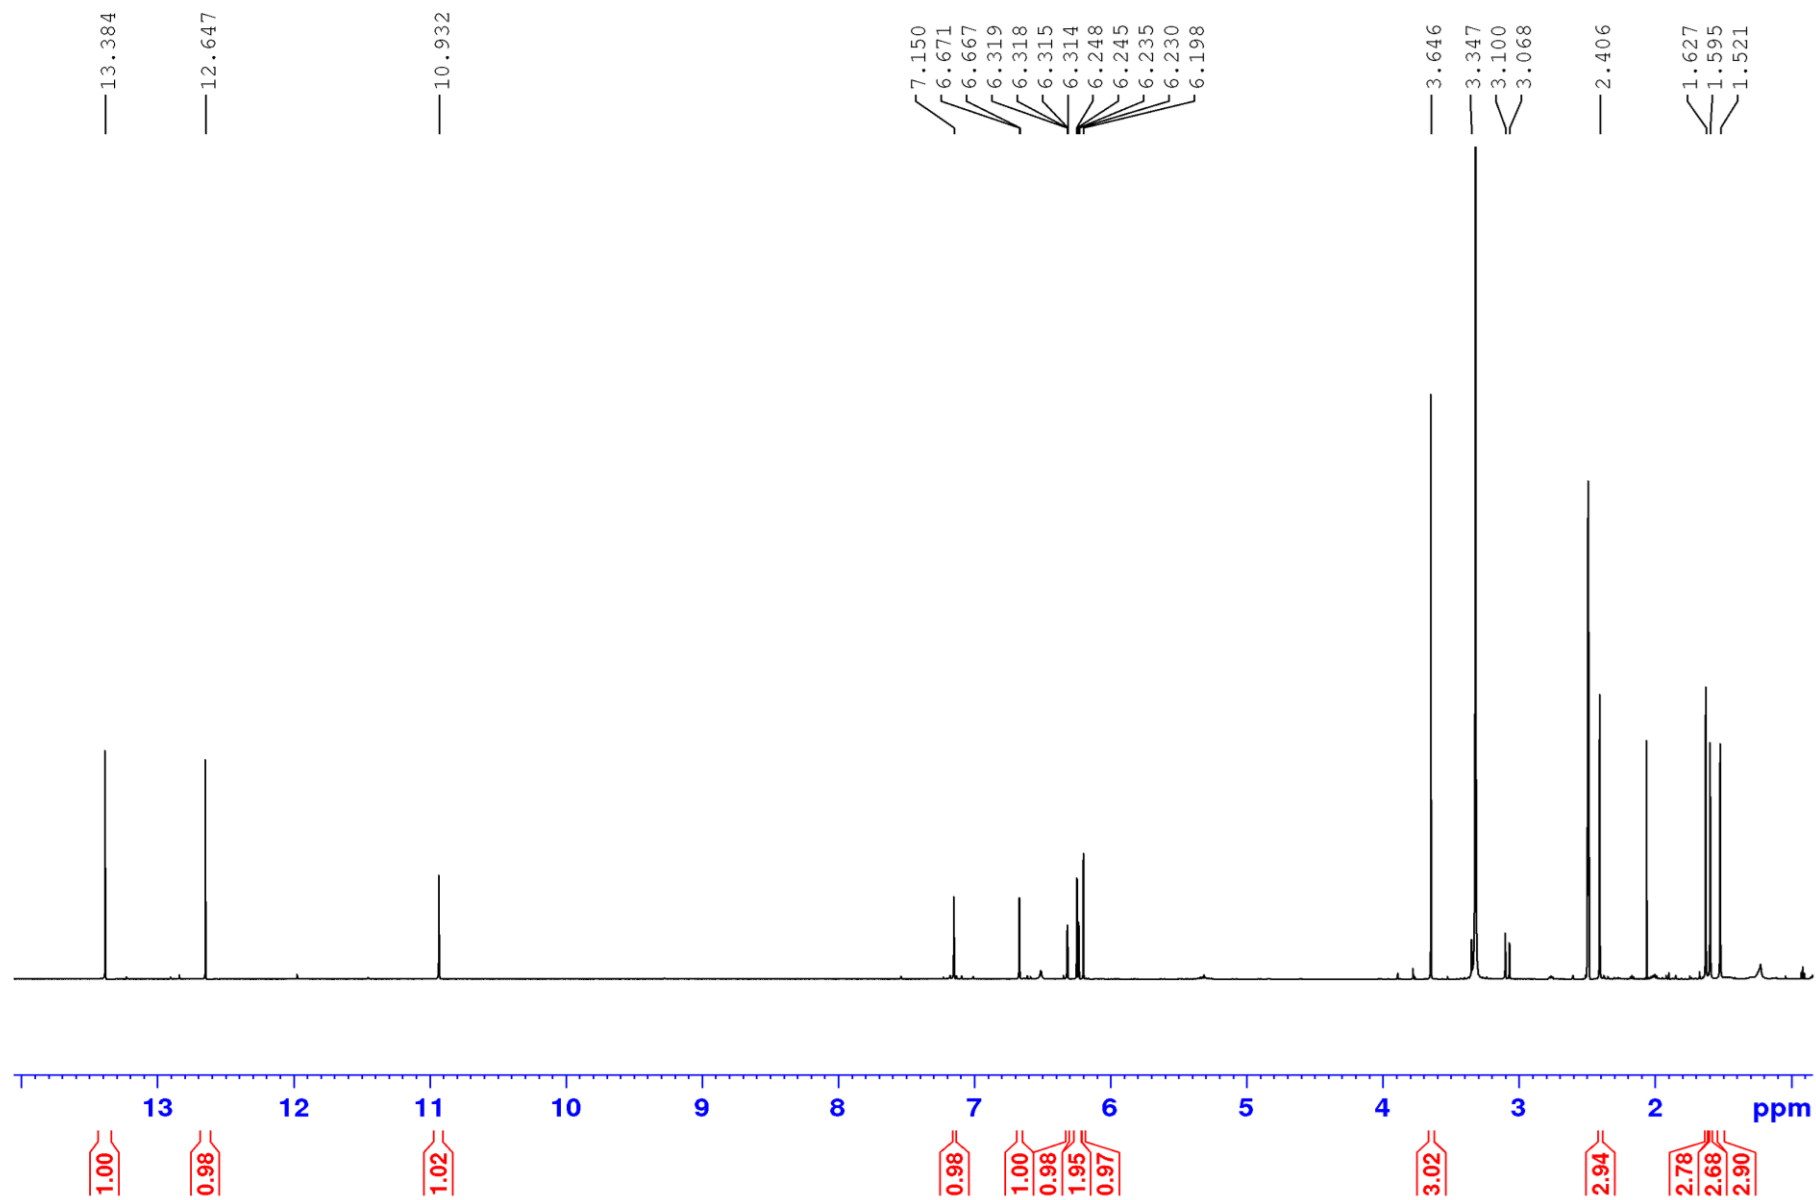

Figure S54. <sup>1</sup>H NMR spectrum (600 MHz, DMSO-*d*<sub>6</sub>) of (-)-ABX-E (14)

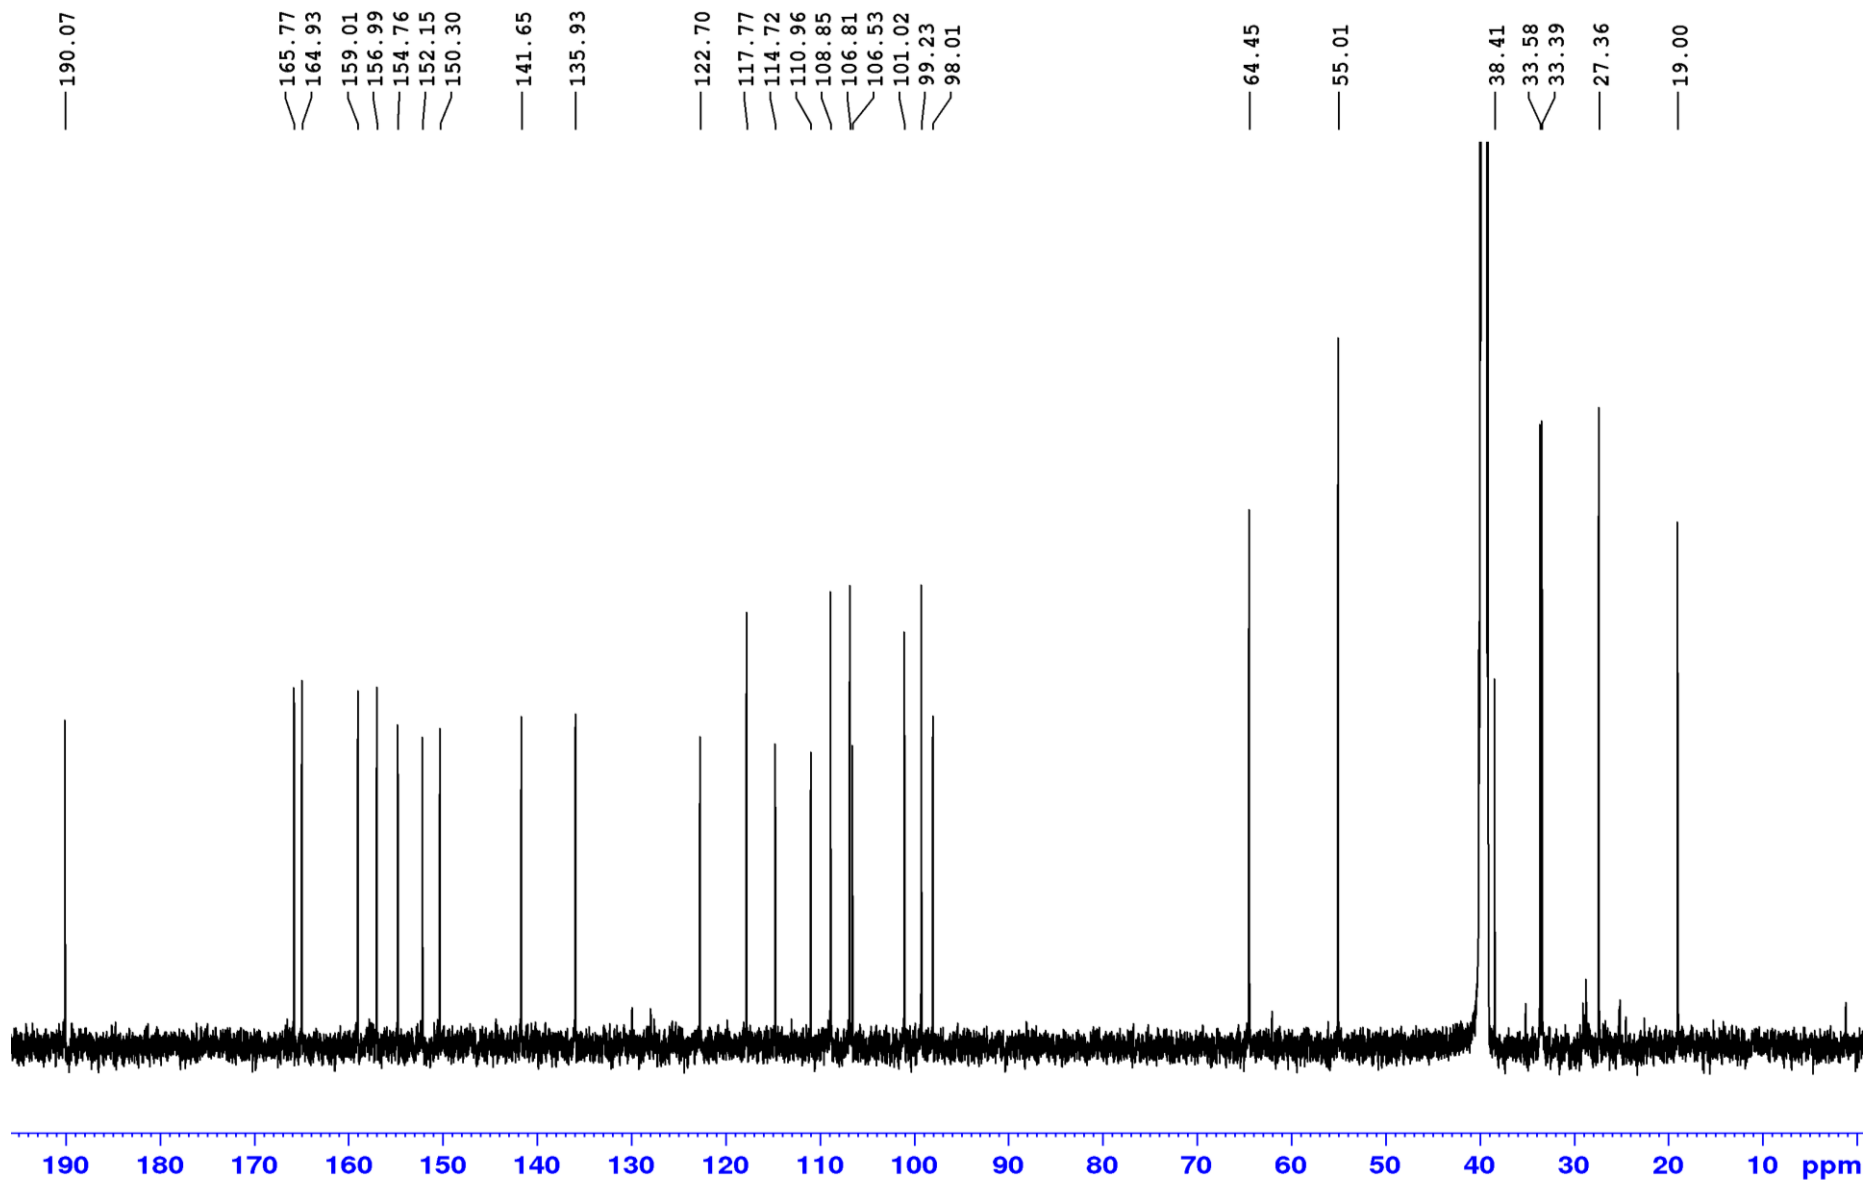

Figure S55.  $^{13}\text{C}$  NMR spectrum (150 MHz,  $\text{DMSO-}d_6$ ) of (-)-ABX-E (**14**)

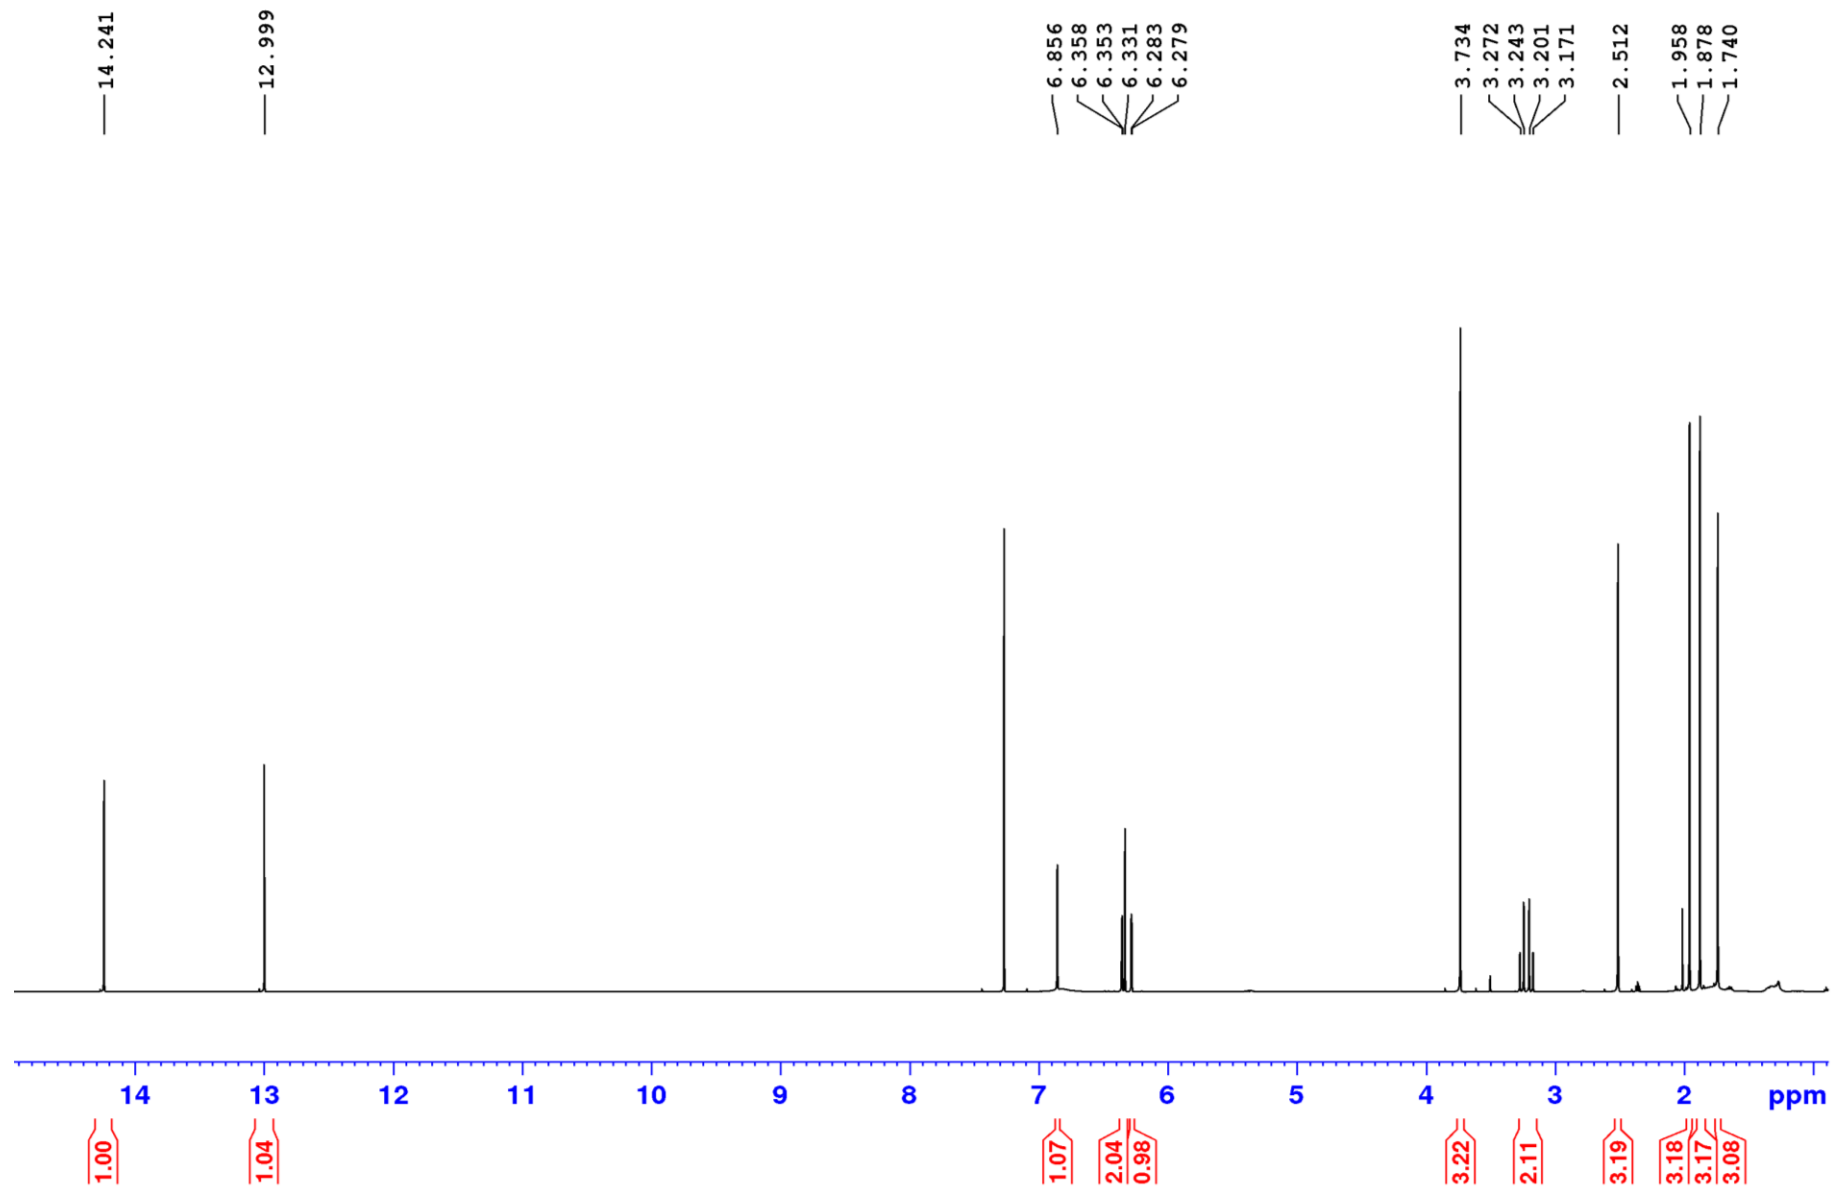

Figure S56. <sup>1</sup>H NMR spectrum (600 MHz, CDCl<sub>3</sub>) of (-)-BABX (15)

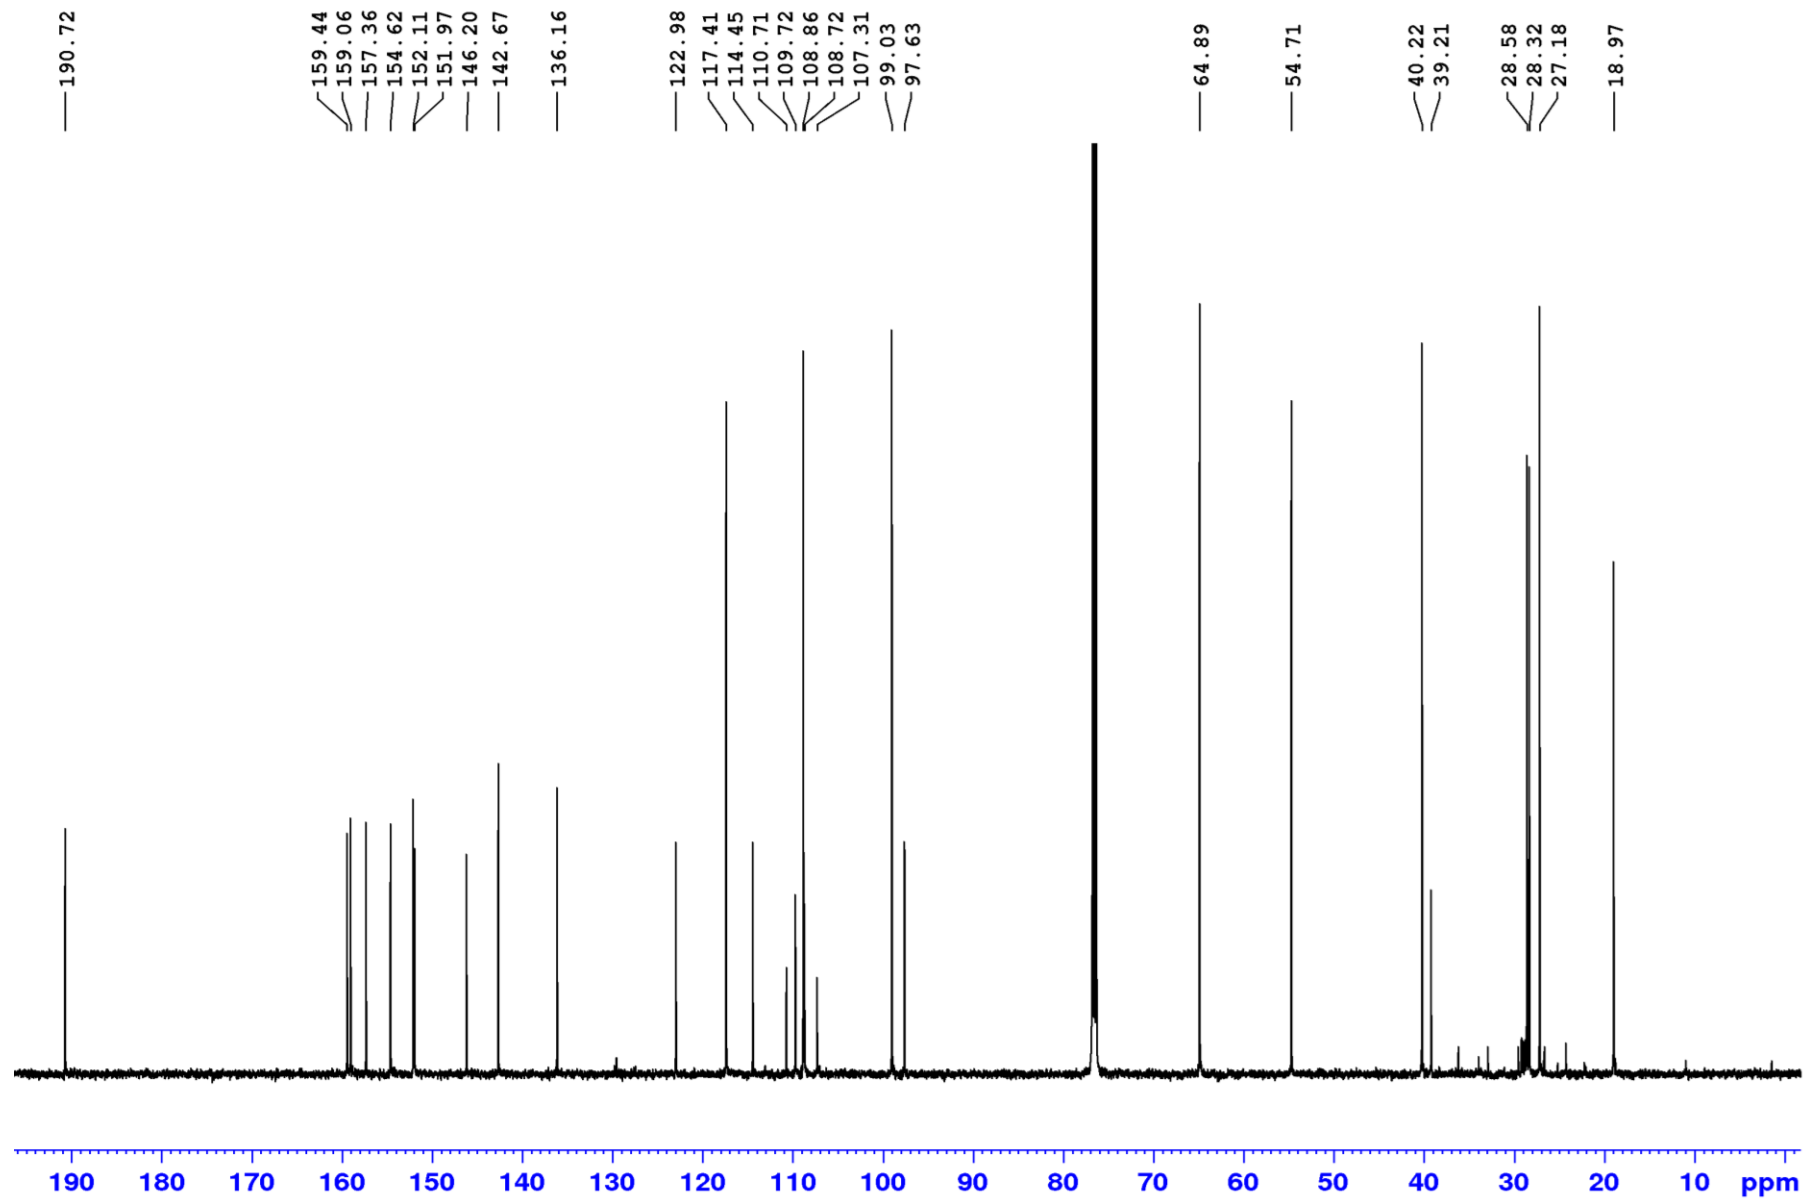

Figure S57.  $^{13}\text{C}$  NMR spectrum (150 MHz,  $\text{CDCl}_3$ ) of (-)-BABX (**15**)

190910\_P0030858\_QEP\_S0005788\_Svetamycin\_analouge\_Positive\_1 #44-61 RT: 0.54-0.70 AV: 18 NL: 3.34E7  
T: FTMS + p ESI Full ms [150.0000-1800.0000]

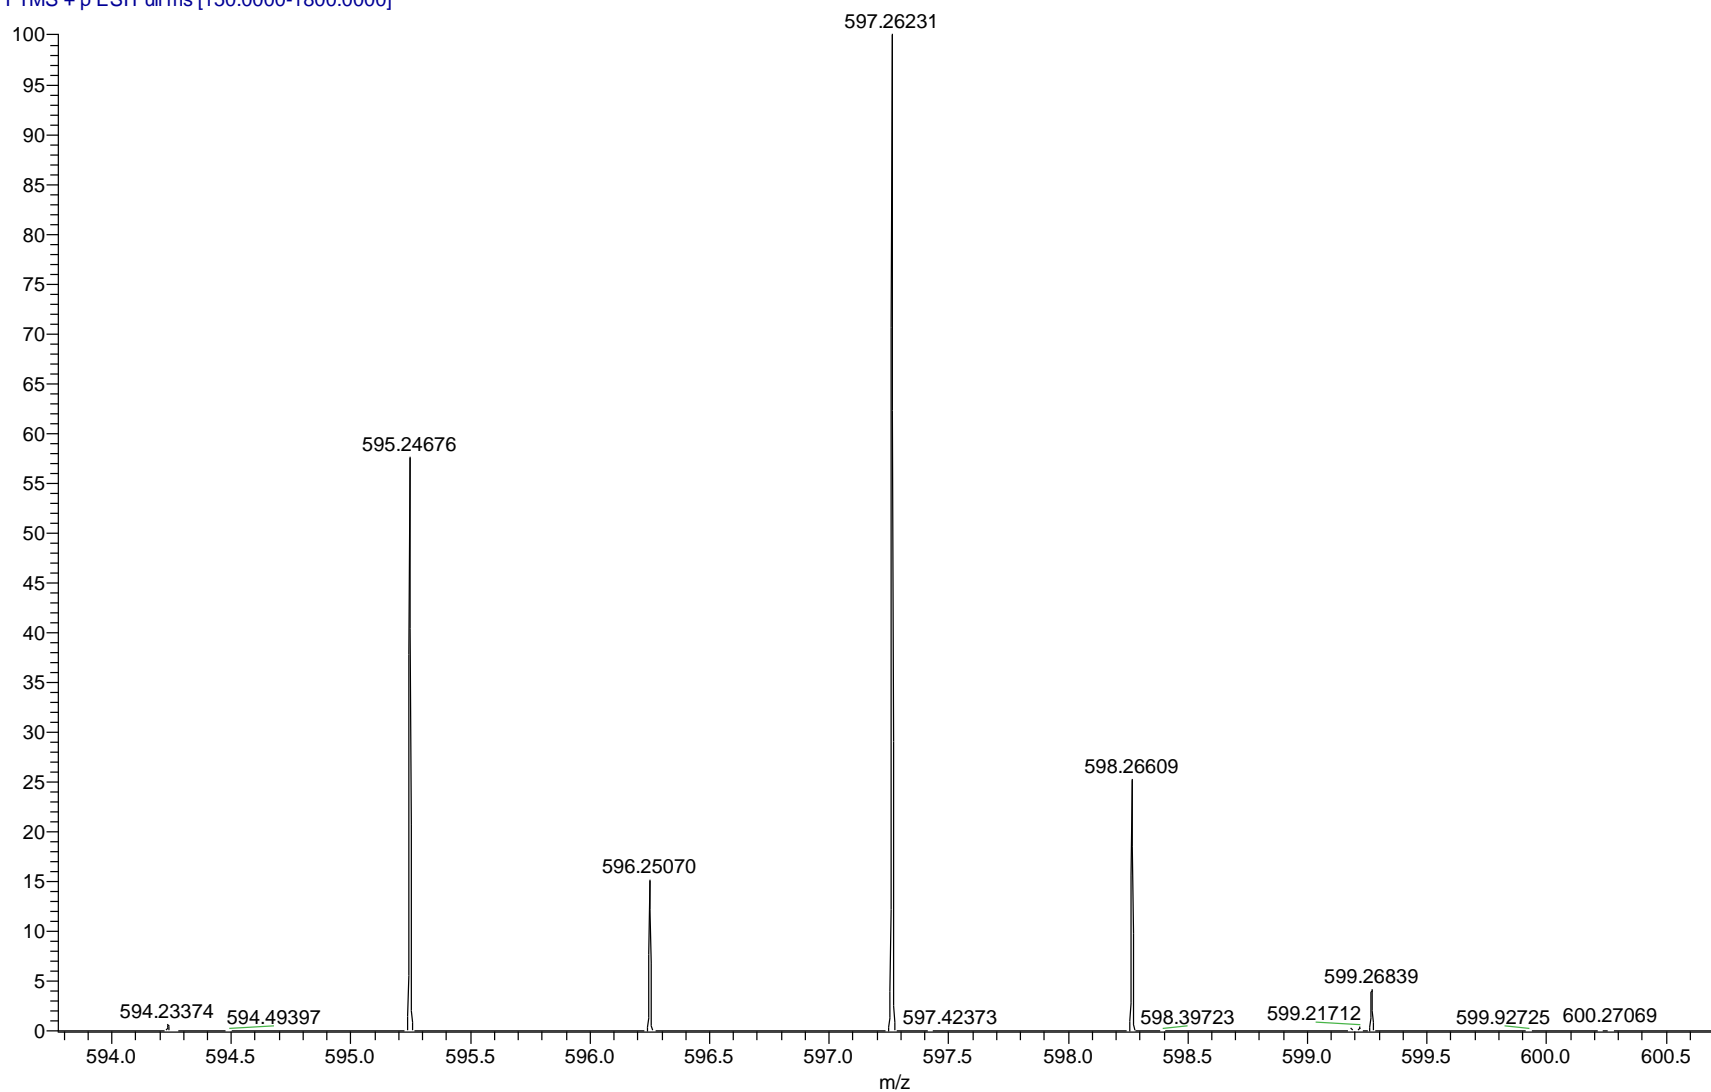

Figure S58. HR-ESI(+)-MS spectrum of deschlorosvetamycin A (1)

190910\_P0030858\_QEP\_S0005789\_TM\_3\_135\_2\_Negative\_1 #49-75 RT: 0.52-0.76 AV: 27 NL: 4.33E8  
T: FTMS - p ESI Full ms [150.0000-1800.0000]

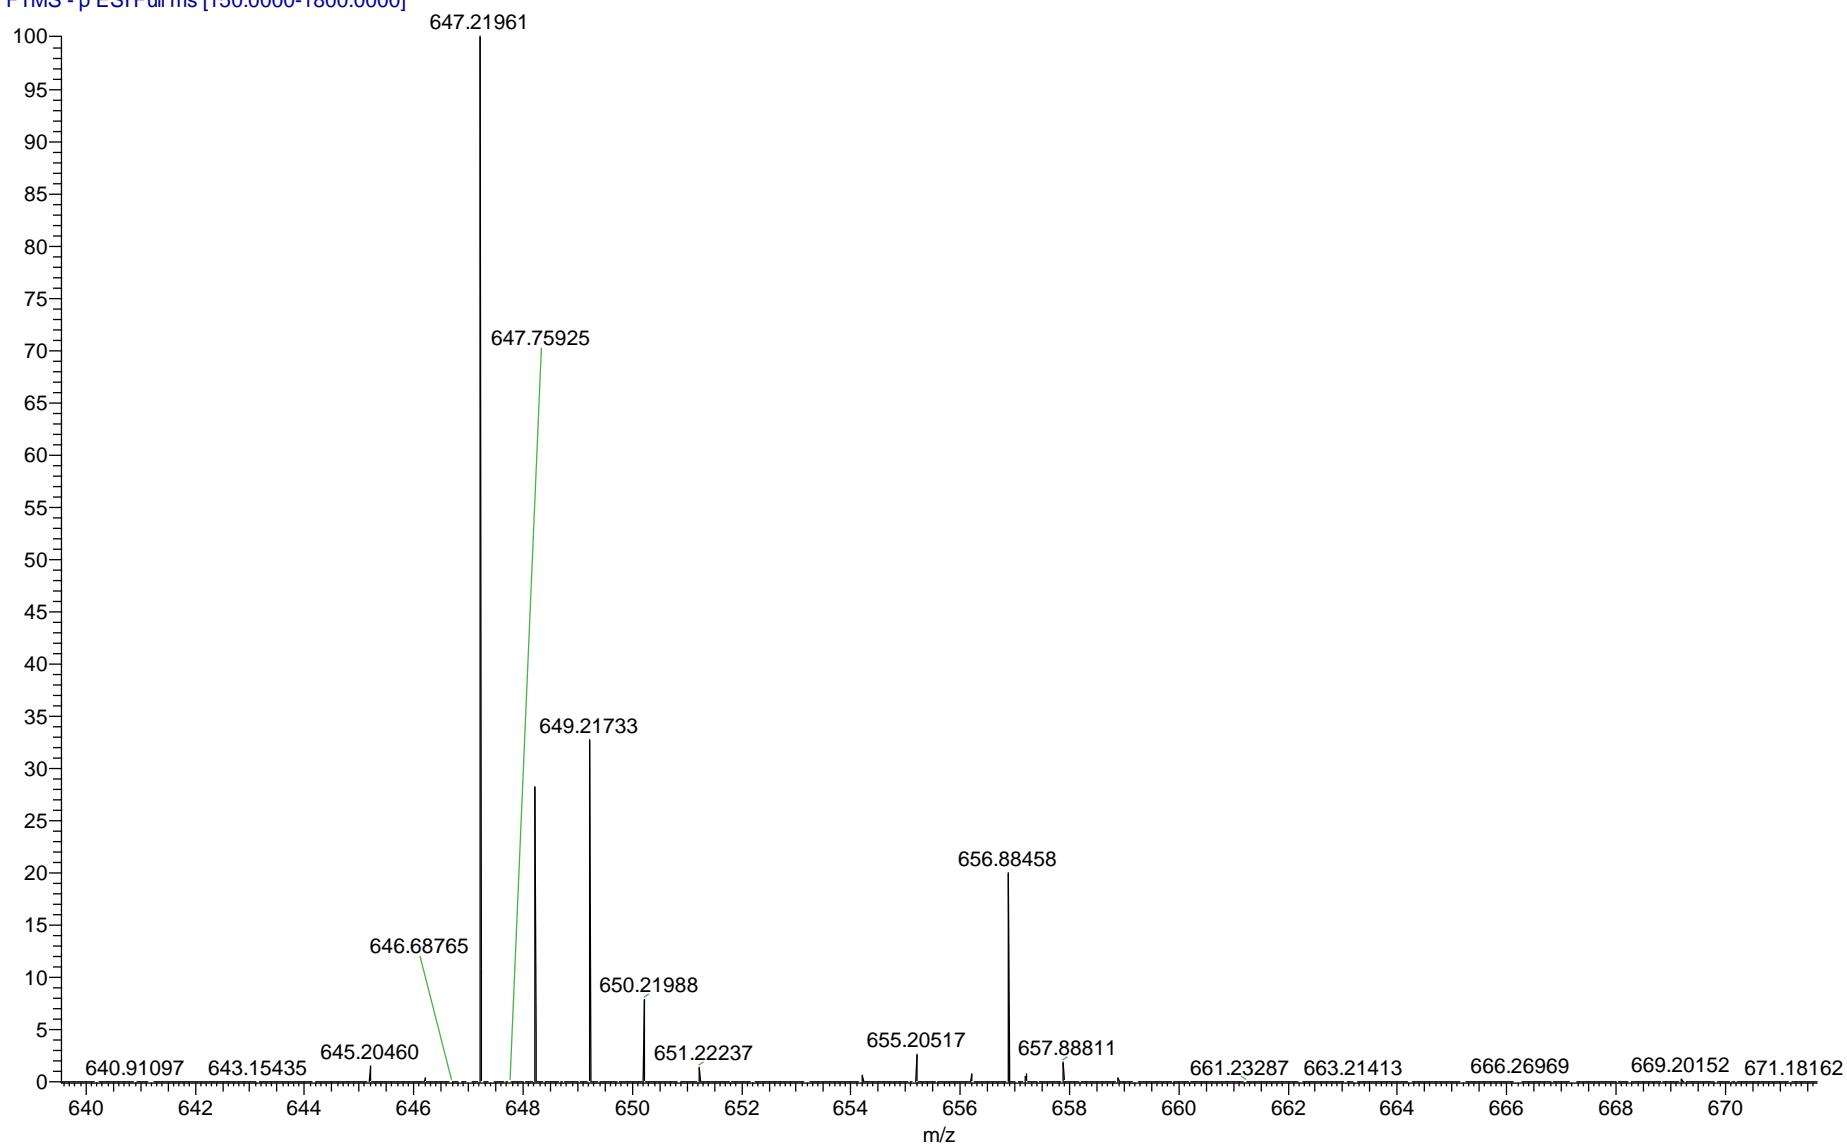

**Figure S59.** HR-ESI(-)-MS spectrum of svetamycin H (2)

190910\_P0030858\_QEP\_S0005787\_TM\_3\_112\_4\_Negative\_1 #51-70 RT: 0.53-0.70 AV: 20 NL: 6.93E7  
T: FTMS - p ESI Full ms [150.0000-1800.0000]

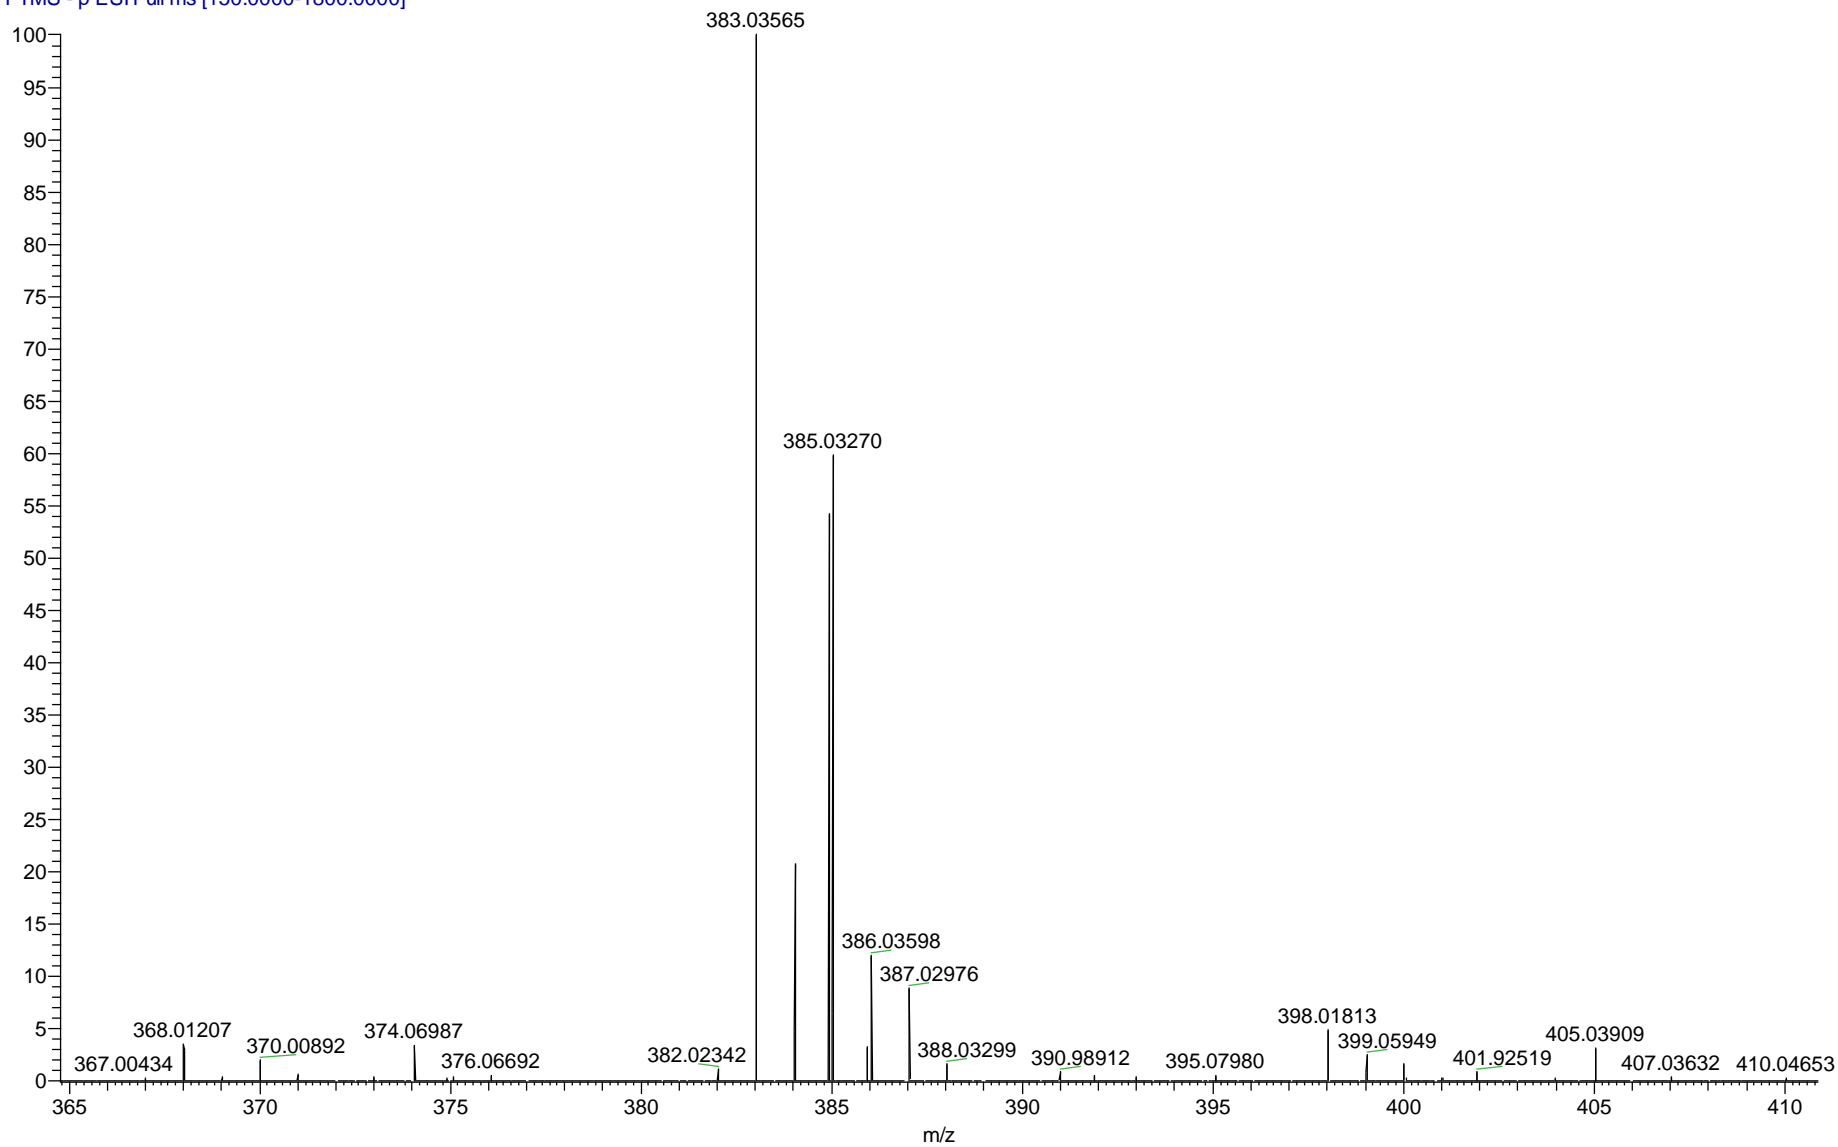

**Figure S60.** HR-ESI(-)-MS spectrum of borregomycin E (4)

190910\_P0030858\_QEP\_S0005786\_TM\_3\_118\_1\_Negative\_1 #50-69 RT: 0.54-0.72 AV: 20 NL: 5.26E7  
T: FTMS - p ESI Full ms [150.0000-1800.0000]

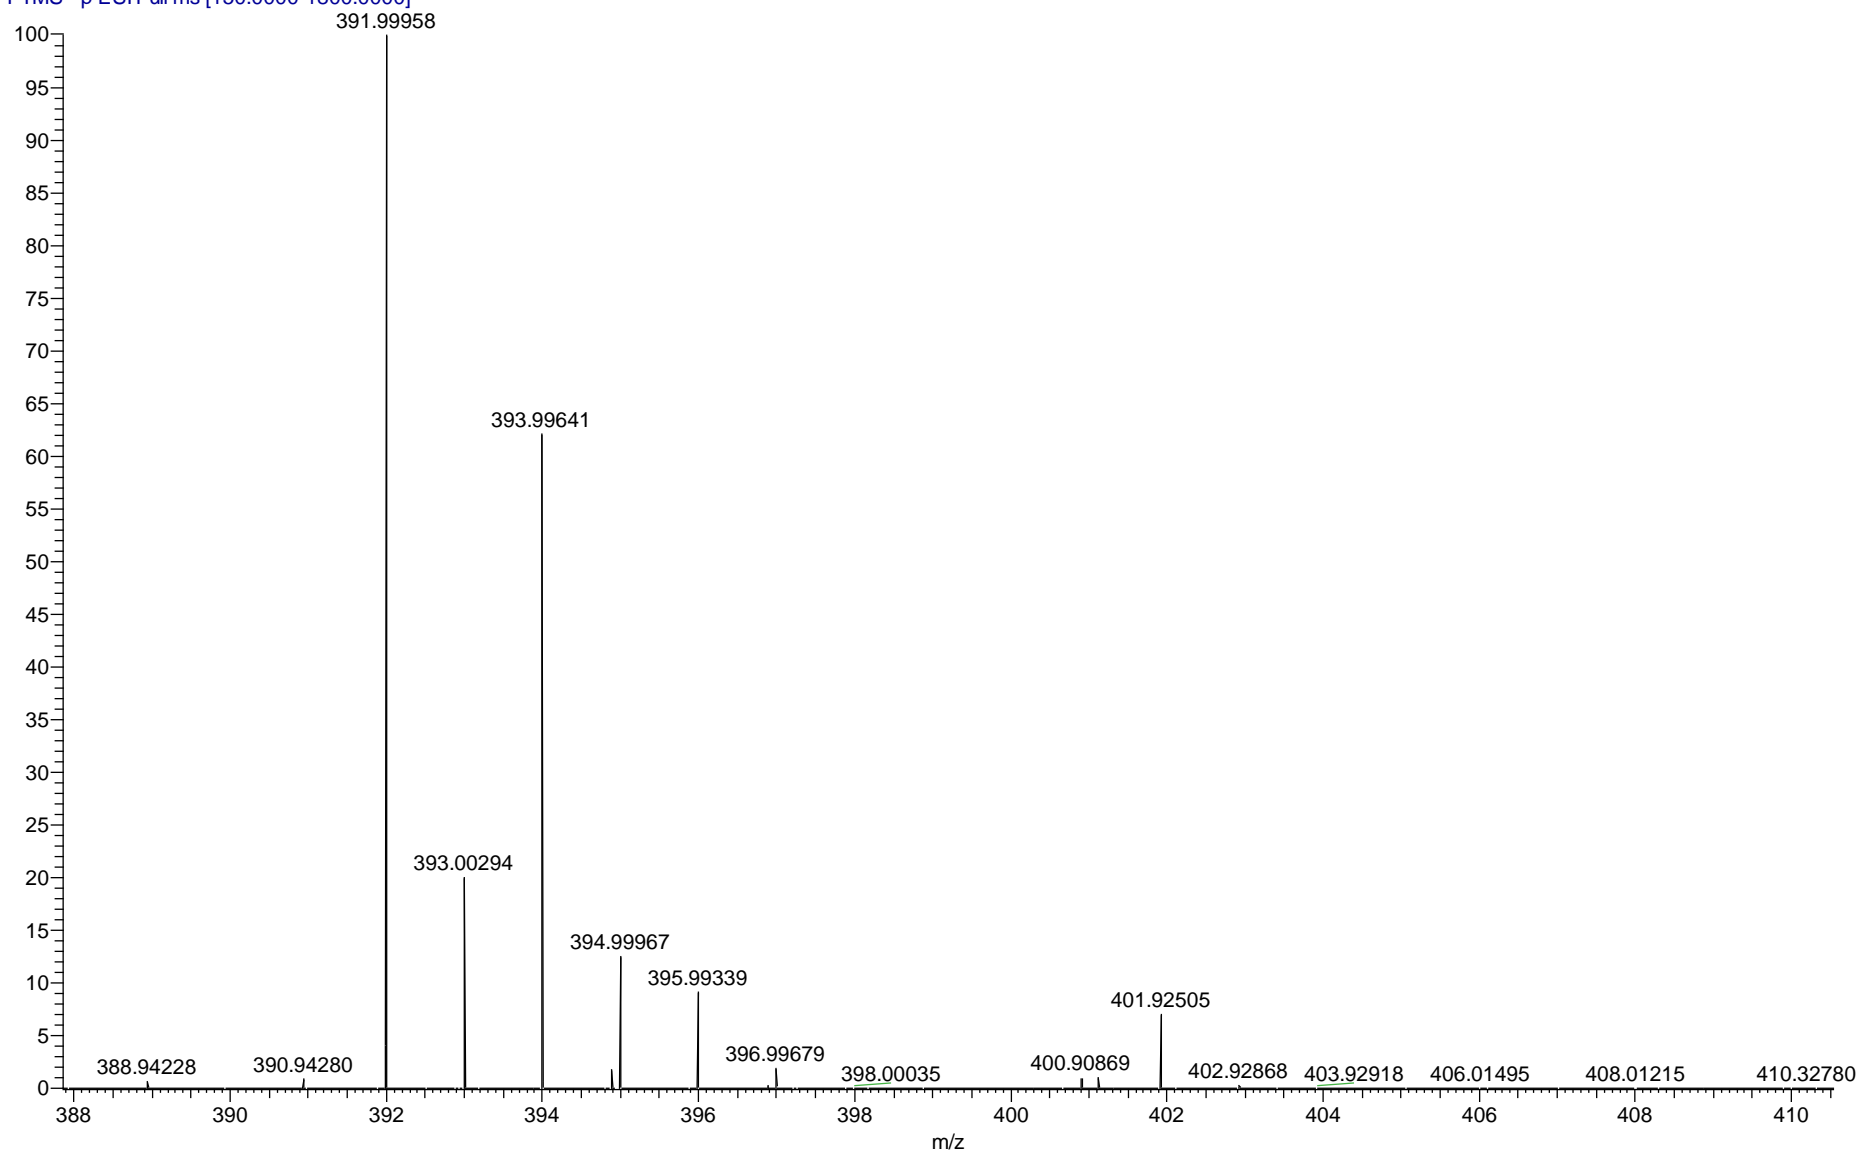

**Figure S61.** HR-ESI(-)-MS spectrum of borregomycin F (5)



190910\_P0030858\_QEP\_S0005785\_TM\_3\_105\_3\_Positive\_1 #42-57 RT: 0.53-0.67 AV: 16 NL: 1.10E6  
T: FTMS + p ESI Full ms [150.0000-1800.0000]

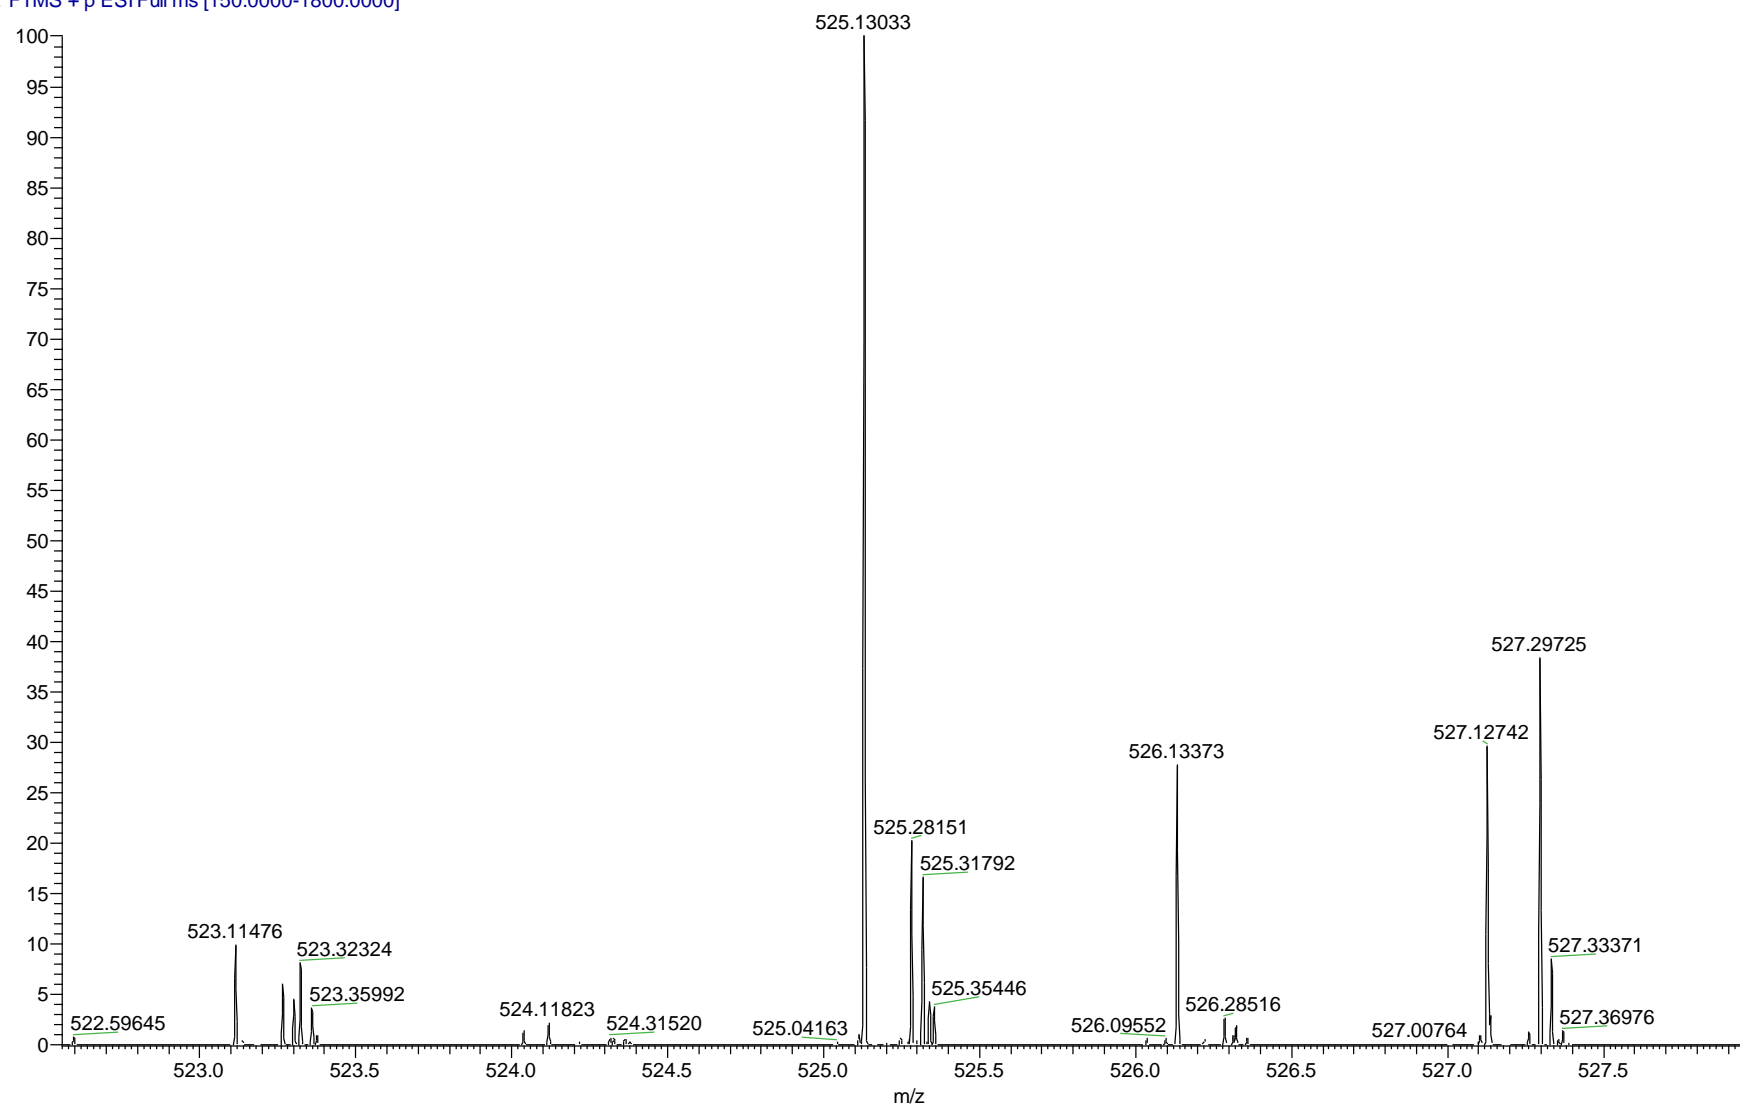

**Figure S62.** HR-ESI(+)-MS spectrum of (+)-ABX-G (**8**)

190910\_P0030858\_QEP\_S0005784\_TM\_3\_105\_4\_Positive\_1 #41-59 RT: 0.53-0.69 AV: 19 NL: 1.00E7  
T: FTMS + p ESI Full ms [150.0000-1800.0000]

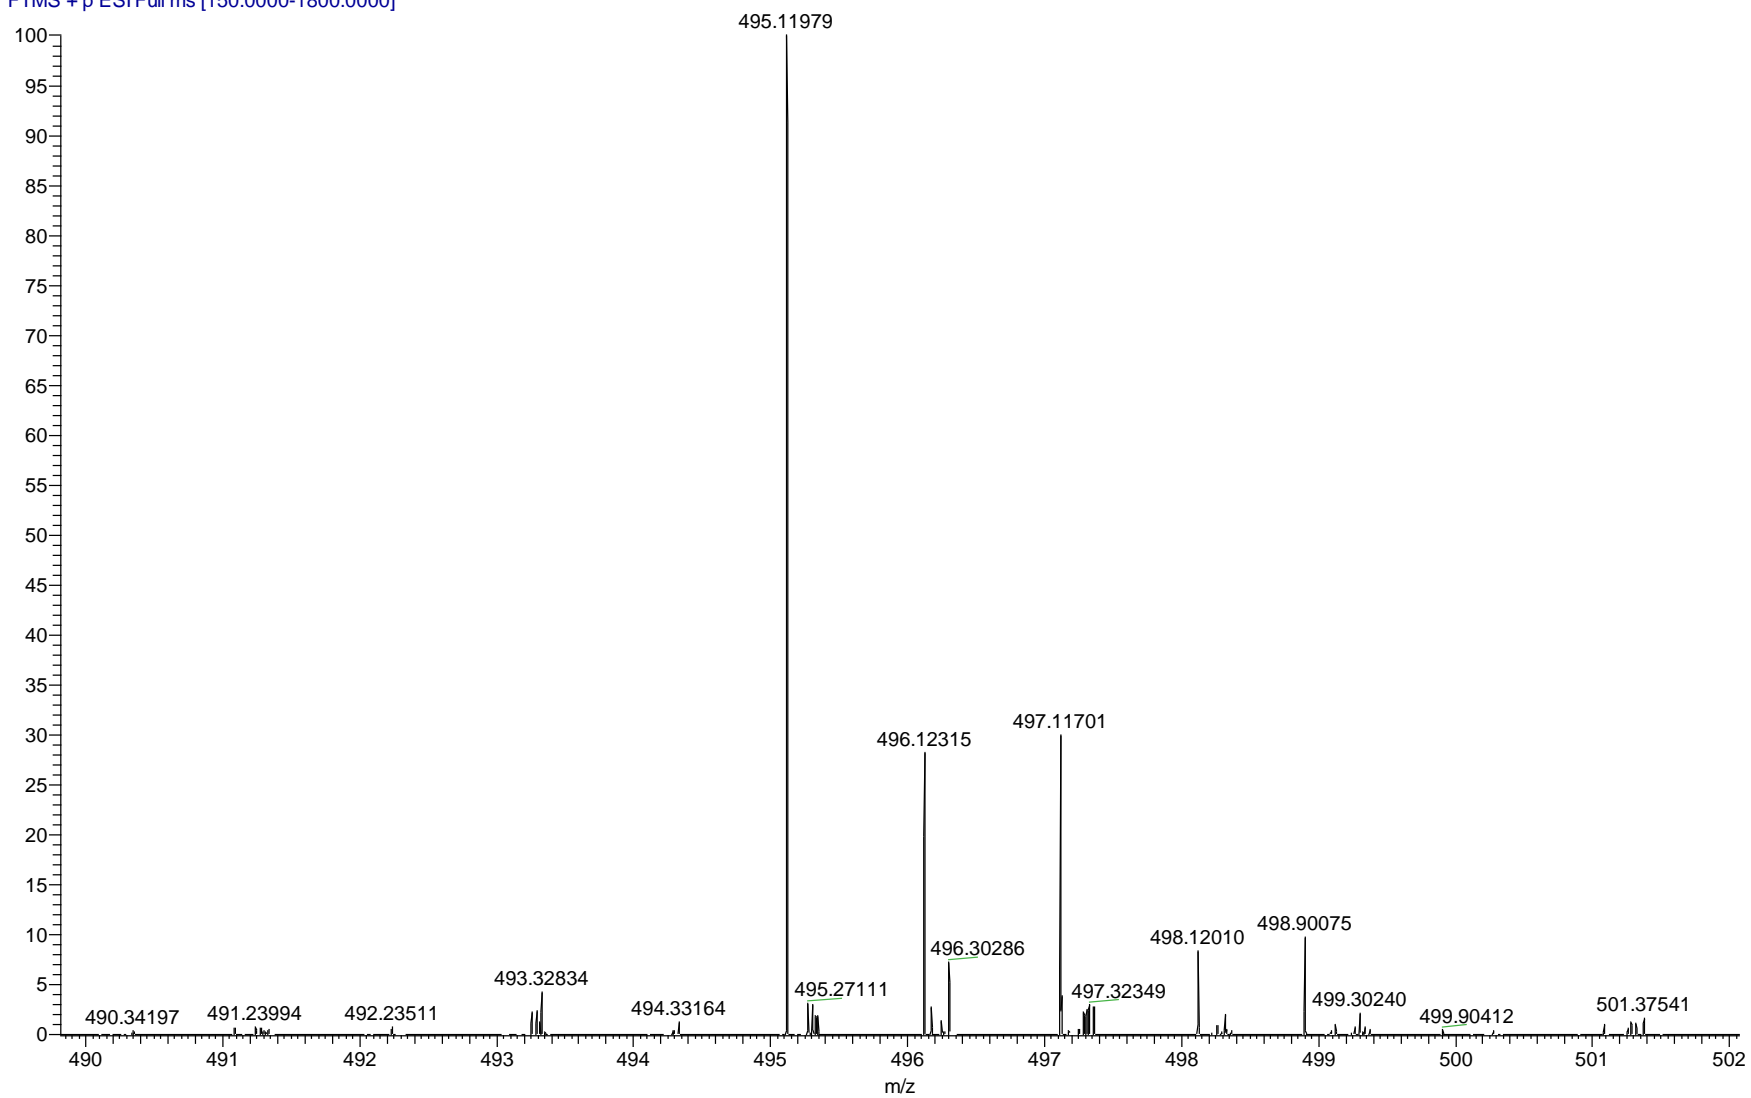

**Figure S63.** HR-ESI(+)-MS spectrum of (-)-ABX-K (**9**)

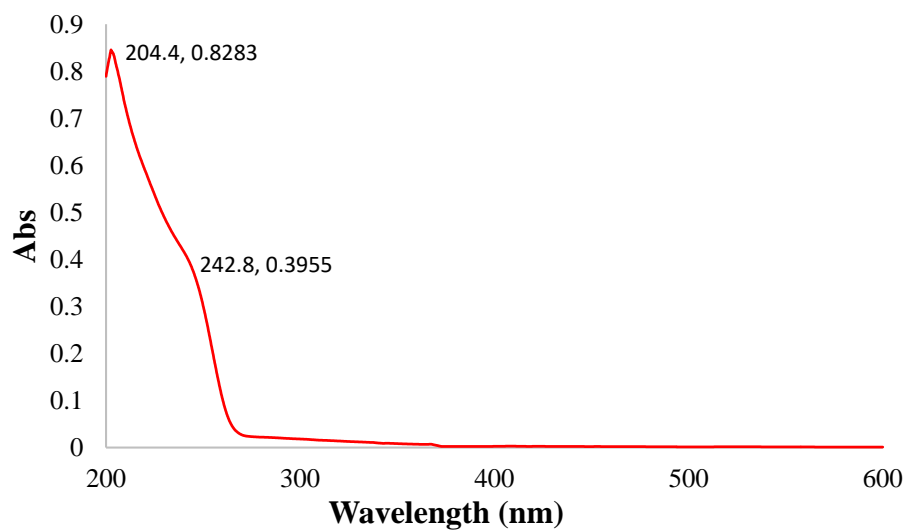

**Figure S64.** UV-vis spectrum of deschlorosvetamycin A (**1**) in  $\text{CHCl}_3$

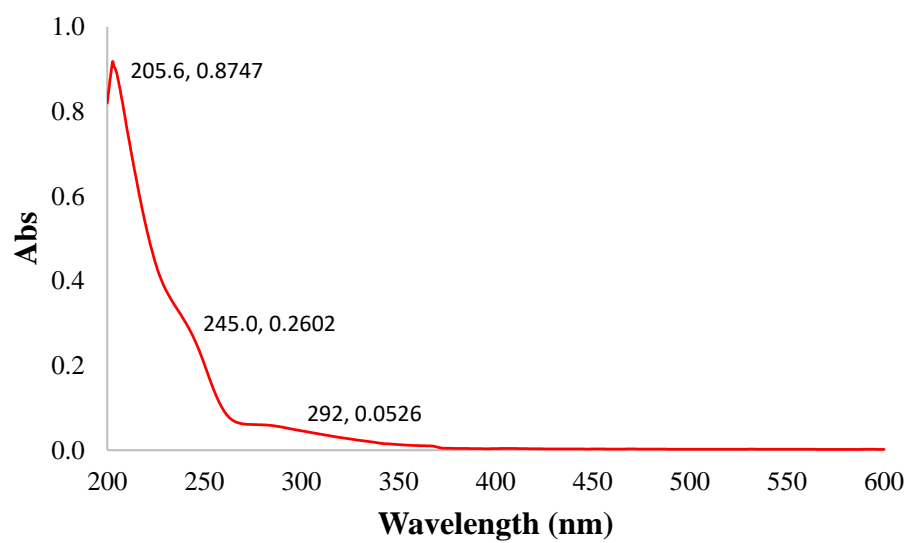

**Figure S65.** UV-vis spectrum of svetamycin H (**2**) in  $\text{CHCl}_3$

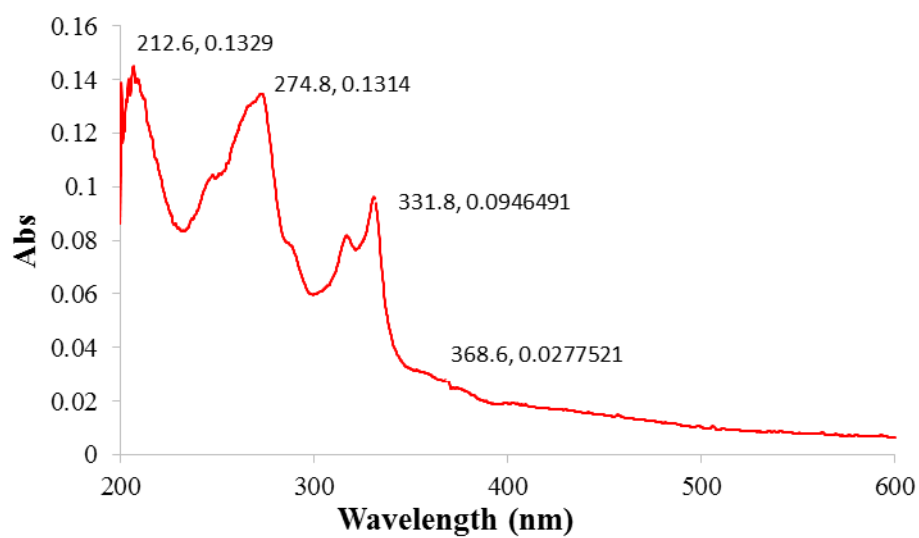

**Figure S66.** UV-vis spectrum of borregomycin E (4) in CHCl<sub>3</sub>

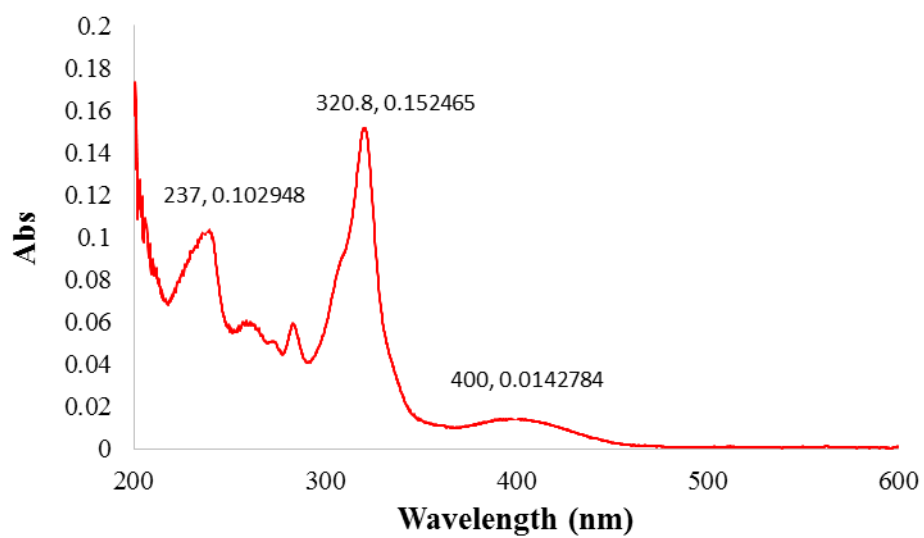

**Figure S67.** UV-vis spectrum of borregomycin F (5) in CHCl<sub>3</sub>

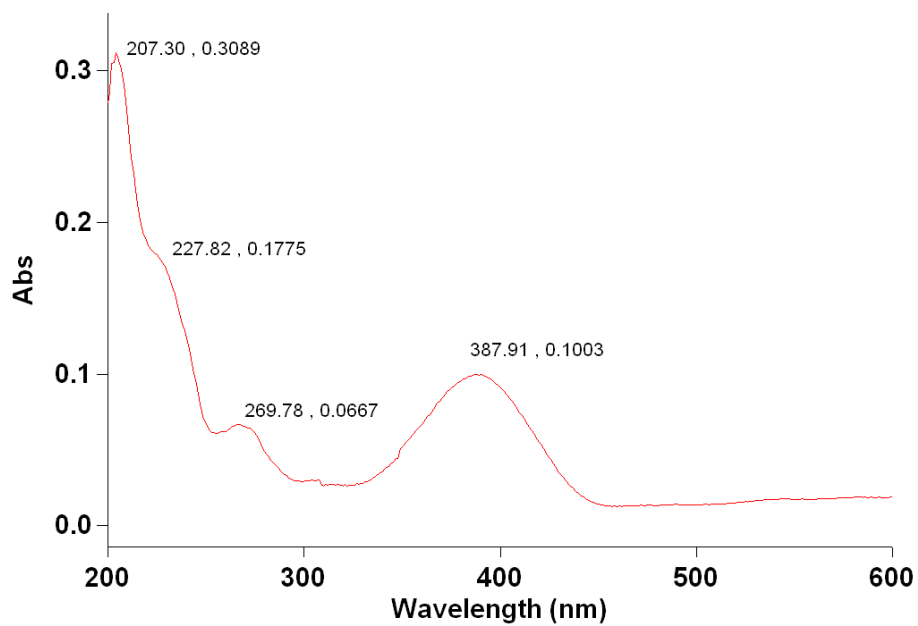

**Figure S68.** UV-vis spectrum of (+)-ABX-G (8) in CHCl<sub>3</sub>

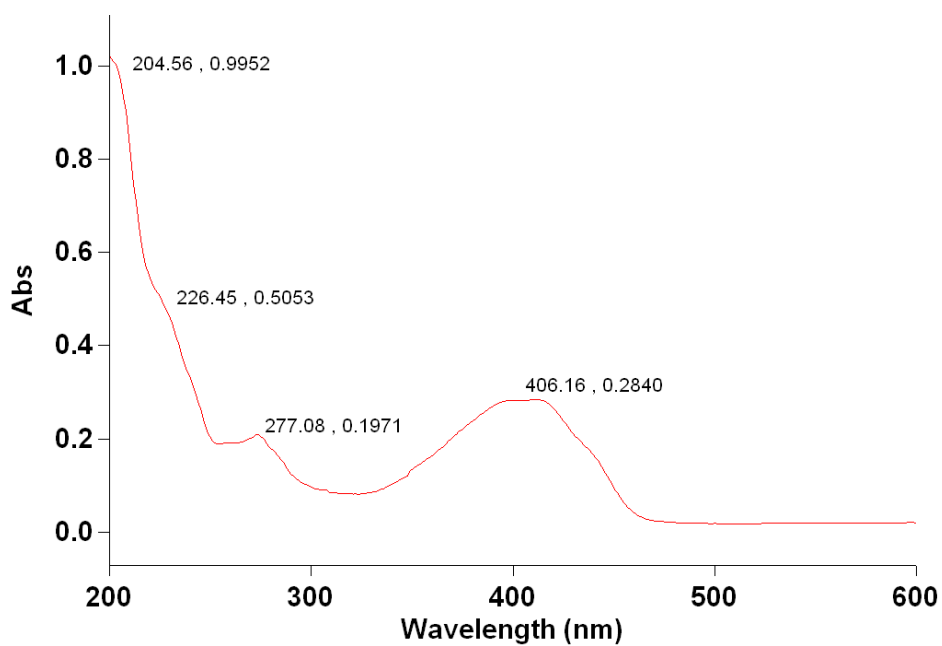

**Figure S69.** UV-vis spectrum of (-)-ABX-K (9) in CHCl<sub>3</sub>

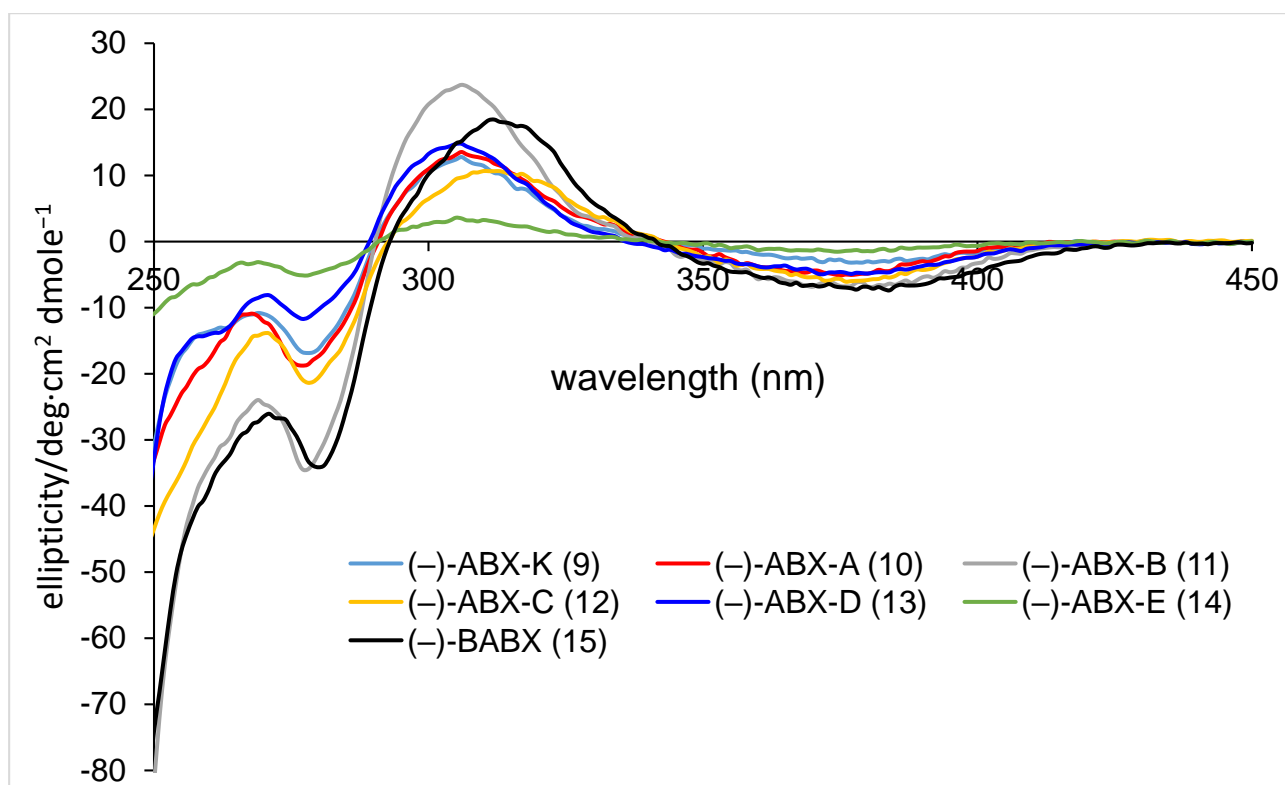

**Figure S70.** ECD spectra of ABX analogues **9–15** in  $\text{CHCl}_3$

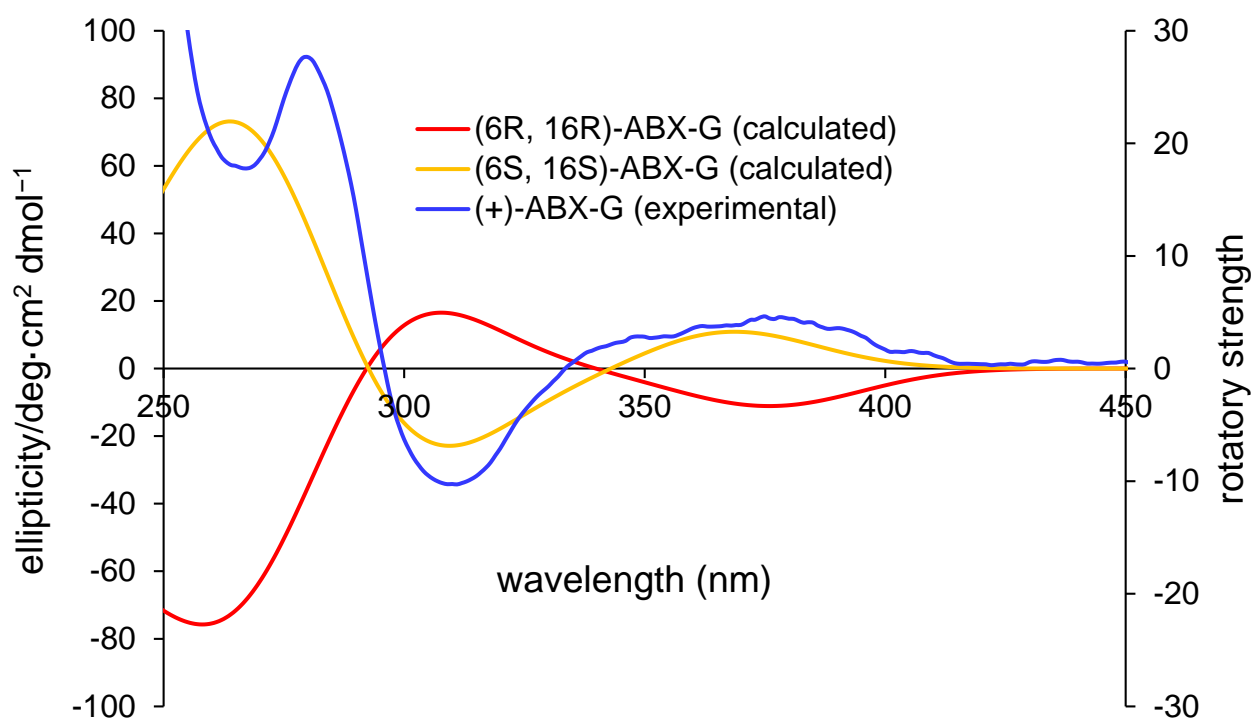

**Figure S71.** TD-DFT-D3(BJ)/PBE0/def2-SV(P)-COSMO(MeCN) calculated rotatory strengths for (6*R*,16*R*)-ABX-G and (6*S*,16*S*)-ABX-G, blue-shifted by 5 nm and broadened with an 18 nm standard deviation, compared to the experimental ECD spectrum for the natural product (+)-ABX-G (**8**).

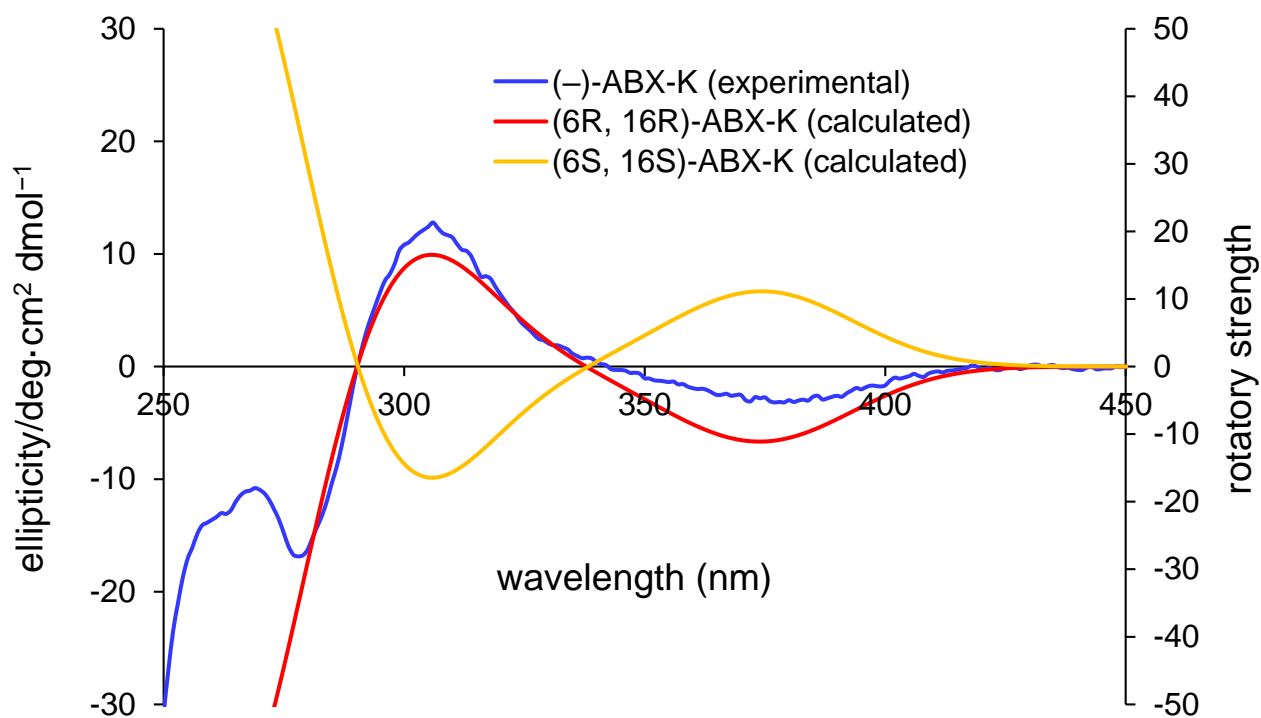

**Figure S72.** TD-DFT-D3(BJ)/PBE0/def2-SV(P)-COSMO(MeCN) calculated rotatory strengths for (6*R*,16*R*)-ABX-K and (6*S*,16*S*)-ABX-K, broadened with an 18 nm standard deviation, compared to the experimental ECD spectrum for the natural product (-)-ABX-K (**9**).



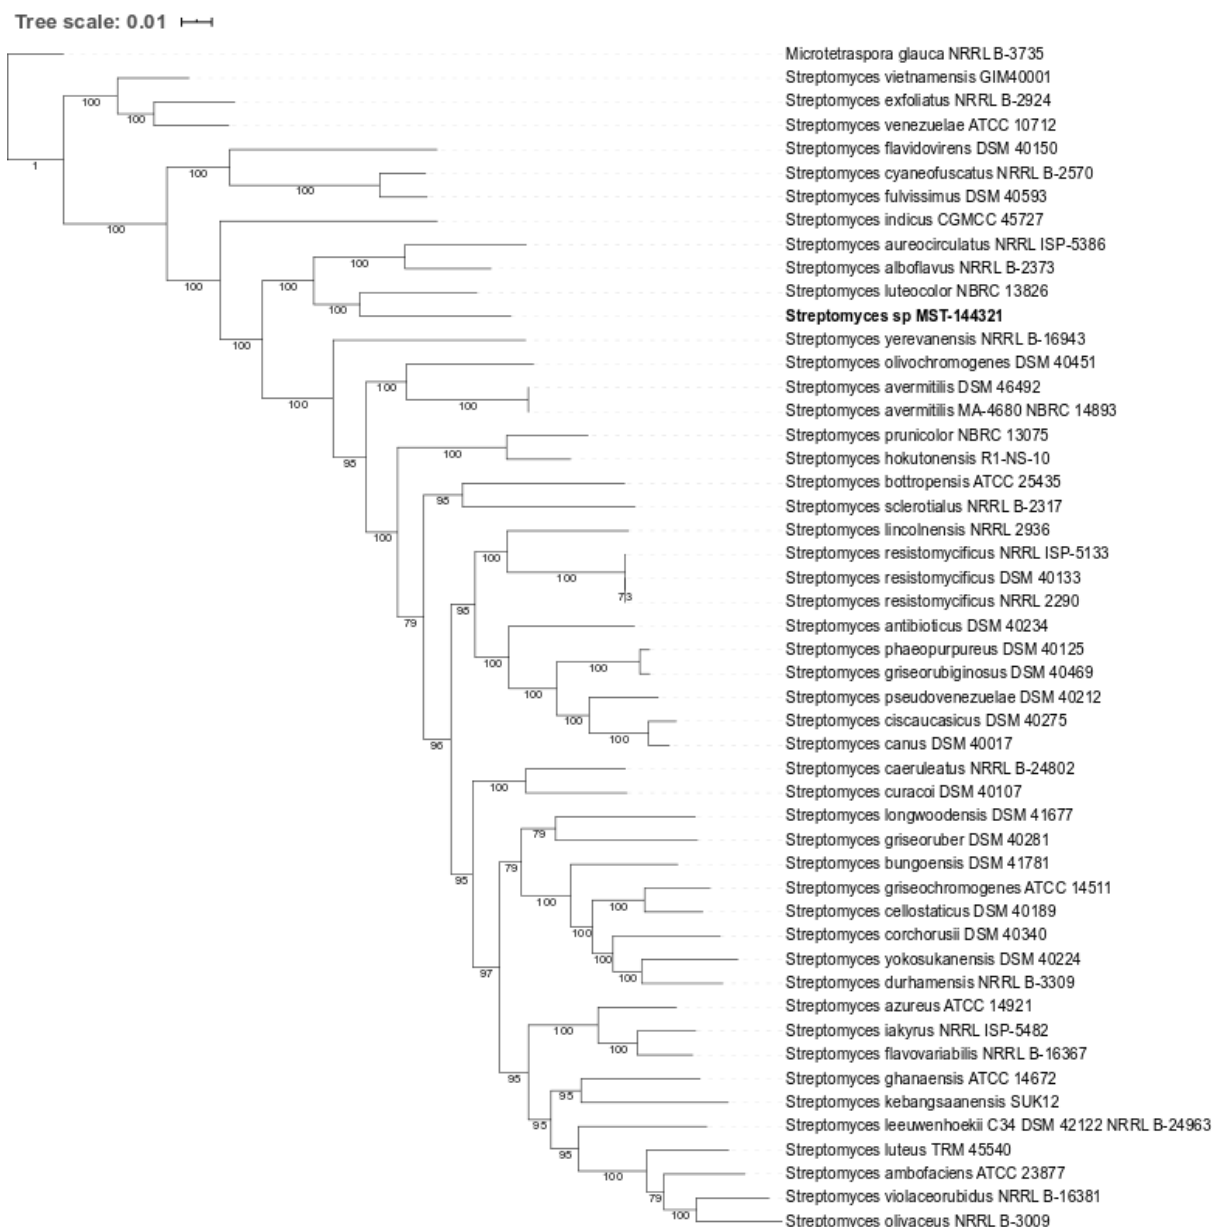

**Figure S73.** Phylogenetic tree of related *Streptomyces* strains as produced by AutoMLST.

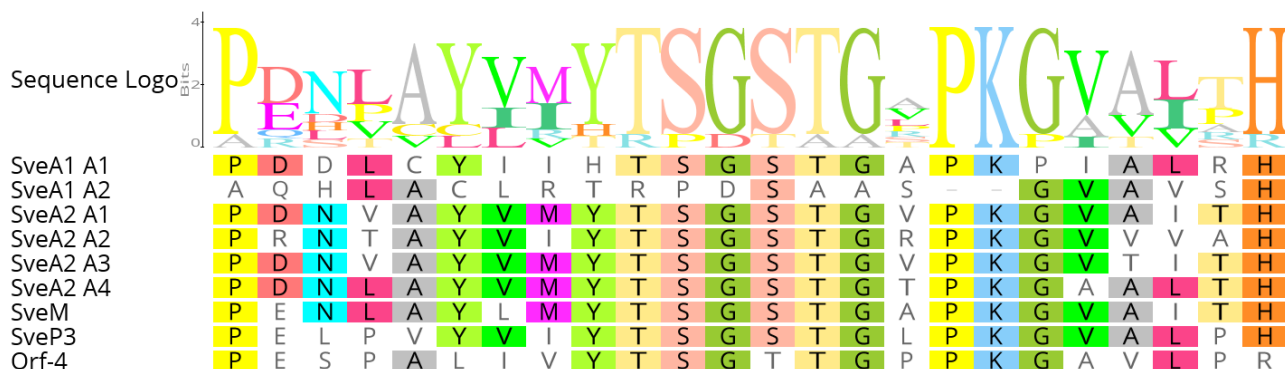

**Figure S74.** Walker motif of adenylation domains from the svetamycin (*sve*) biosynthetic gene cluster.

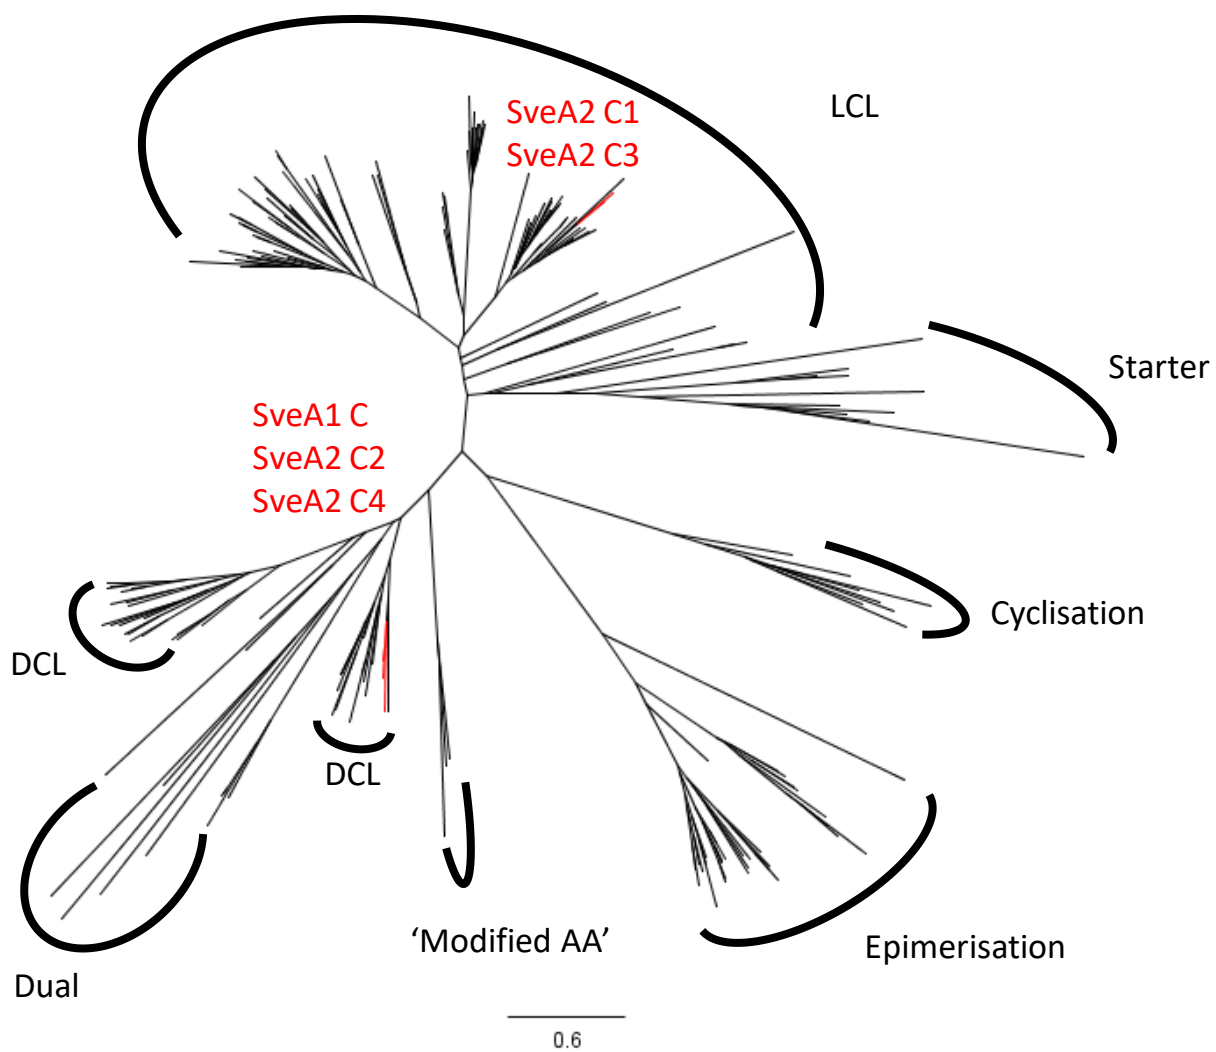

**Figure S75.** Phylogenetic prediction of condensation domain function generated by NaPDoS.<sup>20</sup>

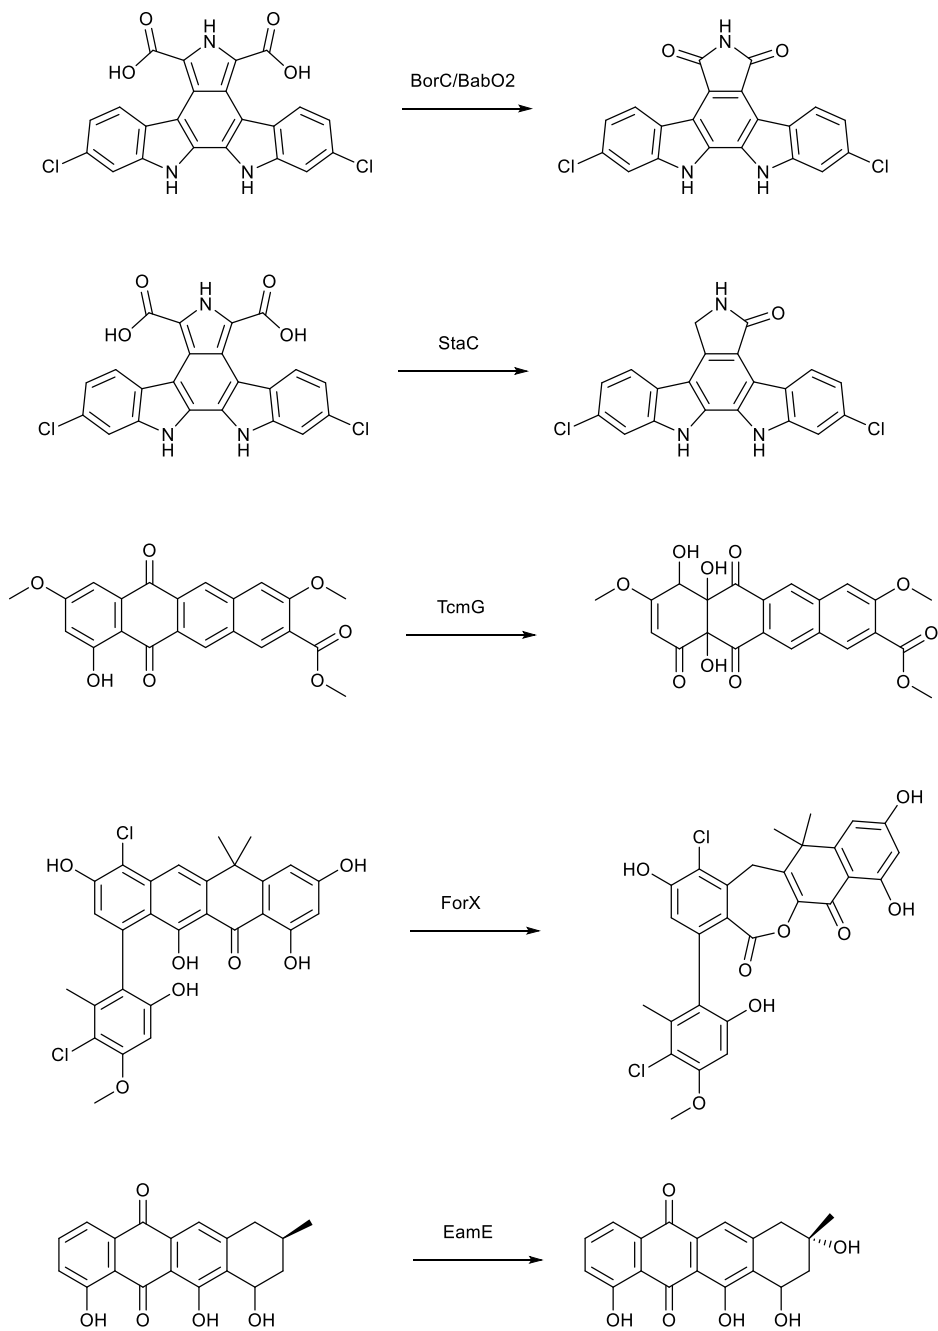

**Figure S76.** Varied oxidative reactions catalysed by BabO2 homologues.

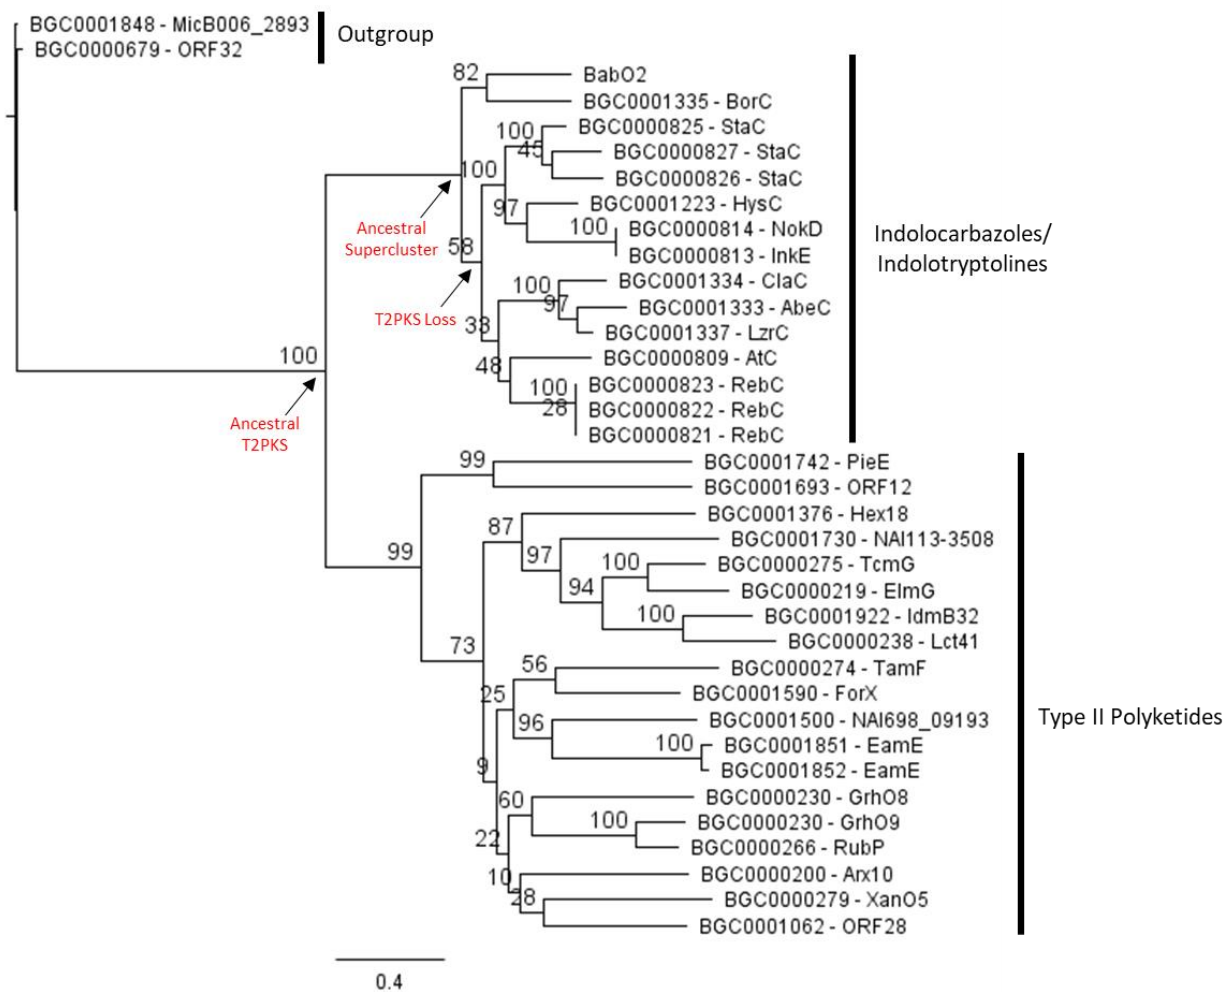

**Figure S77.** Phylogenetic tree of BabO2 homologues indicating the evolutionary history of the biosynthetic supercluster.

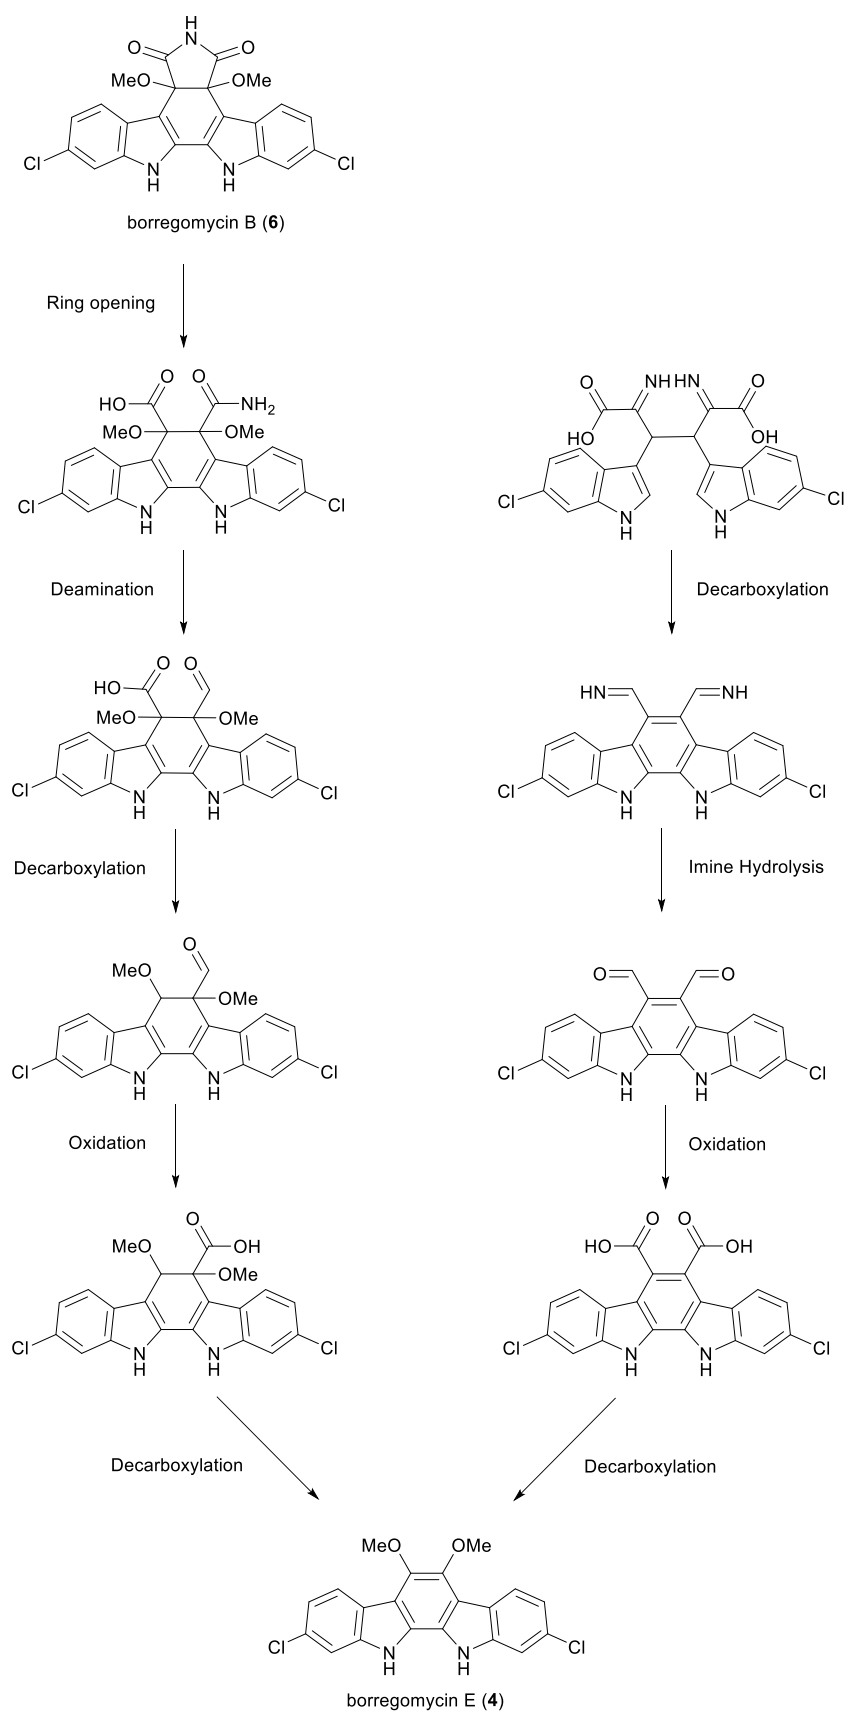

**Figure S78.** Putative pathways for the biosynthesis of borregomycin E (4) adapted from Chilczuk et al., 2020.<sup>21</sup>

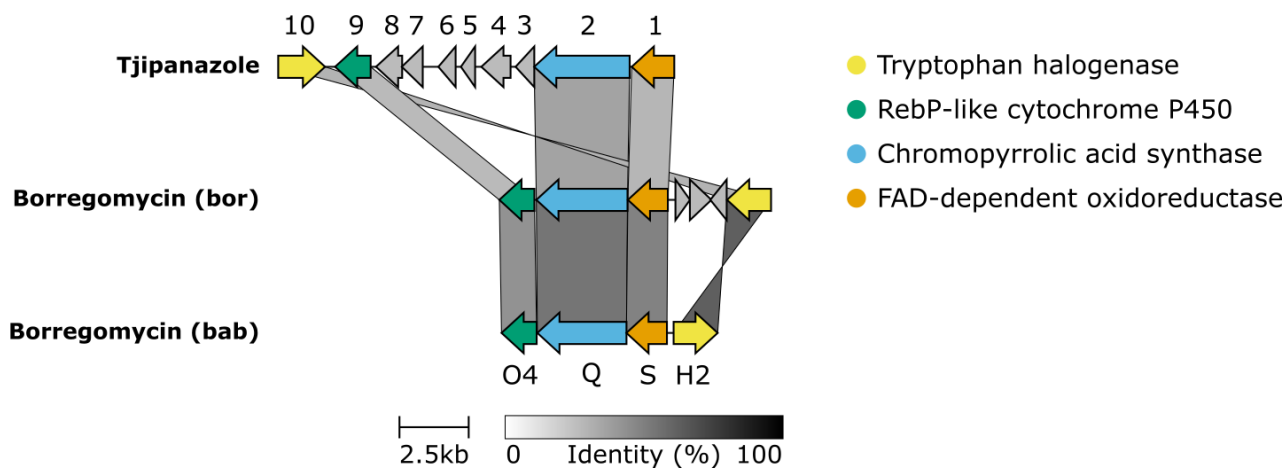

**Figure S79.** Comparison of borregomycin (*bor* and *bab*) and tjipanazole (*tjp*) BGCs. For simplicity, only regions homologous to tjipanazole biosynthesis are shown. Made using clinker<sup>22</sup>

## References

1. Molecular Operating Environment (MOE2019.01), Chemical Computing Group Inc. 1010 Sherbrooke St. W, Suite 910, Montreal, Quebec, Canada H3A 2R7. 2016.
2. Turbomole, V., A Development of University of Karlsruhe and Forschungszentrum Karlsruhe GmbH 1989–2007, Turbomole GmbH, since 2007. 2016; **7**.
3. Andrews, S., FastQC: a quality control tool for high throughput sequence data, <http://www.bioinformatics.babraham.ac.uk/projects/fastqc/>.
4. Wick, R. R.; Judd, L. M.; Gorrie, C. L.; Holt, K. E., *PLoS Comput. Biol.*, 2017, **13**, e1005595.
5. Blin, K.; Shaw, S.; Steinke, K.; Villebro, R.; Ziemert, N.; Lee, S. Y.; Medema, M. H.; Weber, T., *Nucleic Acids Res.*, 2019, **47**, W81-W87.
6. Gilchrist, C. L. M.; Booth, T. J.; Chooi, Y. H., *bioRxiv*, 2020, doi:10.1101/2020.11.08.370601.
7. Sievers, F.; Wilm, A.; Dineen, D.; Gibson, T. J.; Karplus, K.; Li, W.; Lopez, R.; McWilliam, H.; Remmert, M.; Söding, J., *Mol. Syst. Biol.*, 2011, **7**, doi:10.1038/msb.2011.75.
8. Stamatakis, A., *Bioinformatics*, 2014, **30**, 1312-1313.
9. Price, M. N.; Dehal, P. S.; Arkin, A. P., *PLoS One*, 2010, **5**, e9490.
10. FigTree v.1.4.3, <http://tree.bio.ed.ac.uk/software/figtree/>, (accessed Sep 27, 2018).
11. Antipov, D.; Raiko, M.; Lapidus, A.; Pevzner, P. A., *Genome Res.*, 2019, **29**, 961-968.
12. Wick, R. R.; Schultz, M. B.; Zobel, J.; Holt, K. E., *Bioinformatics*, 2015, **31**, 3350-3352.
13. Jolley, K. A.; Maiden, M. C., *BMC bioinformatics*, 2010, **11**, doi:org/10.1186/1471-2105-11-595.
14. Labeda, D. P., *Int. J. Syst. Evol. Microbiol.*, 2011, **61**, 2525-2531.
15. Alanjary, M.; Steinke, K.; Ziemert, N., *Nucleic Acids Res.*, 2019, **47**, W276-W282.
16. Rigaku, O. D., CrysAlisPro Software System, Version 1.171. 41.103a, Rigaku Cooperation. Oxford, UK: 2021.
17. Sheldrick, G. M., *Acta Crystallogr., Sect. A: Found. Adv.*, 2015, **71**, 3-8.
18. Sheldrick, G. M., *Acta Crystallogr., Sect. A: Found. Crystallogr.*, 2008, **64**, 112-122.
19. Dolomanov, O. V.; Bourhis, L. J.; Gildea, R. J.; Howard, J. A.; Puschmann, H., *J. Appl. Crystallogr.*, 2009, **42**, 339-341.
20. Ziemert, N.; Podell, S.; Penn, K.; Badger, J. H.; Allen, E.; Jensen, P. R., *PLoS One*, 2012, **7**, e34064.
21. Chilczuk, T.; Schäberle, T. F.; Vahdati, S.; Mettal, U.; El Omari, M.; Enke, H.; Wiese, M.; König, G. M.; Niedermeyer, T. H. J., *ChemBioChem*, 2020, **21**, 2170-2177.
22. <https://www.biorxiv.org/content/10.1101/2020.11.08.370650v1?rss=1>.
